# Supplementary material for: Rapid Evolution of Coral Proteins Responsible for Interaction with the Environment
Source: PLoS One. 2011 May 25;6(5):e20392. doi: 10.1371/journal.pone.0020392 (PMC3102110; doi:10.1371/journal.pone.0020392)
Supplement: Table S2 — List of molecular function GO categories most strongly enriched with orthologs (false discovery rate 10%) displaying elevated dN/dS and their assigned orthologs. (XLS) [file pone.0020392.s005.xls]

## Sheet: molfun.txt
dnds	seq	annotation
NA	GO:0016298	lipase activity
0.641	SEQINDEX12576_C_c_s	1-O-acylceramide synthase OS=Mus musculus GN=Lypla3 PE=1 SV=1; Accession=LYPA3_MOUSE; E-value=2.0e-83
1.0981	SEQINDEX15465_C_c_s	Conodipine-M alpha chain OS=Conus magus PE=1 SV=2; Accession=COMA_CONMA; E-value=5.0e-11
0.9106	SEQINDEX16046_C_c_s	Lipase ZK262.3 OS=Caenorhabditis elegans GN=ZK262.3 PE=1 SV=1; Accession=LIP1_CAEEL; E-value=9.0e-25
1.7289	SEQINDEX2461_C_c_s	Phospholipase A2 OS=Aipysurus laevis PE=2 SV=1; Accession=PA2_AIPLA; E-value=3.0e-16
0.4496	SEQINDEX3427_C_c_s	Proactivator polypeptide OS=Bos taurus GN=PSAP PE=1 SV=3; Accession=SAP_BOVIN; E-value=2.0e-47
0.2793	SEQINDEX6607_C_c_s	Probable phospholipase D family member FLJ33580 homolog OS=Xenopus tropicalis GN=TGas067k05.1 PE=2 SV=1; Accession=YQ008_XENTR; E-value=1.0e-40
0.3304	SEQINDEX7318_C_c_s	JmjC domain-containing protein 5 OS=Rattus norvegicus GN=Jmjd5 PE=2 SV=1; Accession=JMJD5_RAT; E-value=1.0e-15
1.0225	SEQINDEX7781_C_c_s	Pancreatic lipase-related protein 1 OS=Mus musculus GN=Pnliprp1 PE=2 SV=2; Accession=LIPR1_MOUSE; E-value=2.0e-53
0.7765	SEQINDEX7782_C_c_s	Pancreatic lipase-related protein 1 OS=Mus musculus GN=Pnliprp1 PE=2 SV=2; Accession=LIPR1_MOUSE; E-value=4.0e-46
0.7208	SEQINDEX8781_C_c_s	Peroxiredoxin-6 OS=Gallus gallus GN=PRDX6 PE=2 SV=3; Accession=PRDX6_CHICK; E-value=8.0e-87
NA	GO:0004888	transmembrane receptor activity
0.5604	SEQINDEX1063_C_c_s	Muscle M-line assembly protein unc-89 OS=Caenorhabditis elegans GN=unc-89 PE=1 SV=3; Accession=UNC89_CAEEL; E-value=6.0e-08
0.509	SEQINDEX12205_C_c_s	Neuropilin-1a OS=Danio rerio GN=nrp1a PE=2 SV=1; Accession=NRP1A_DANRE; E-value=2.0e-20
1.0263	SEQINDEX13512_C_c_s	Hemicentin-1 OS=Homo sapiens GN=HMCN1 PE=1 SV=2; Accession=HMCN1_HUMAN; E-value=1.0e-06
1.0495	SEQINDEX13525_C_c_s	Hemicentin-1 OS=Homo sapiens GN=HMCN1 PE=1 SV=2; Accession=HMCN1_HUMAN; E-value=2.0e-42
0.3199	SEQINDEX13535_C_c_s	Hemicentin-1 OS=Homo sapiens GN=HMCN1 PE=1 SV=2; Accession=HMCN1_HUMAN; E-value=1.0e-29
0.081	SEQINDEX14492_C_c_s	Neuropeptide FF receptor 1 OS=Homo sapiens GN=NPFFR1 PE=1 SV=1; Accession=NPFF1_HUMAN; E-value=2.0e-32
1.3714	SEQINDEX14752_C_c_s	Frizzled-1 OS=Xenopus laevis GN=fzd1 PE=2 SV=1; Accession=FZD1_XENLA; E-value=9.0e-39
0.001	SEQINDEX15694_C_c_s	Frizzled-4 OS=Homo sapiens GN=FZD4 PE=1 SV=2; Accession=FZD4_HUMAN; E-value=1.0e-139
0.3758	SEQINDEX2027_C_c_s	Thyrotropin-releasing hormone receptor OS=Gallus gallus GN=TRHR PE=2 SV=1; Accession=TRFR_CHICK; E-value=6.0e-09
0.2597	SEQINDEX2367_C_c_s	Neurogenic locus Notch protein OS=Drosophila melanogaster GN=N PE=1 SV=3; Accession=NOTCH_DROME; E-value=2.0e-26
0.7309	SEQINDEX31_C_c_s	DNA-directed RNA polymerase III subunit RPC9 OS=Bos taurus GN=CRCP PE=2 SV=1; Accession=RPC9_BOVIN; E-value=8.0e-22
0.3909	SEQINDEX3801_C_c_s	Somatostatin receptor type 5 OS=Homo sapiens GN=SSTR5 PE=1 SV=3; Accession=SSR5_HUMAN; E-value=9.0e-13
0.5592	SEQINDEX4338_C_c_s	Type-2 angiotensin II receptor OS=Homo sapiens GN=AGTR2 PE=1 SV=1; Accession=AGTR2_HUMAN; E-value=3.0e-25
0.6228	SEQINDEX5202_C_c_s	Enteropeptidase OS=Bos taurus GN=PRSS7 PE=1 SV=1; Accession=ENTK_BOVIN; E-value=2.0e-16
0.9767	SEQINDEX6872_C_c_s	Toll-like receptor 2 OS=Boselaphus tragocamelus GN=TLR2 PE=2 SV=1; Accession=TLR2_BOSTR; E-value=4.0e-13
NA	GO:0004620	phospholipase activity
0.641	SEQINDEX12576_C_c_s	1-O-acylceramide synthase OS=Mus musculus GN=Lypla3 PE=1 SV=1; Accession=LYPA3_MOUSE; E-value=2.0e-83
1.0981	SEQINDEX15465_C_c_s	Conodipine-M alpha chain OS=Conus magus PE=1 SV=2; Accession=COMA_CONMA; E-value=5.0e-11
1.7289	SEQINDEX2461_C_c_s	Phospholipase A2 OS=Aipysurus laevis PE=2 SV=1; Accession=PA2_AIPLA; E-value=3.0e-16
0.4496	SEQINDEX3427_C_c_s	Proactivator polypeptide OS=Bos taurus GN=PSAP PE=1 SV=3; Accession=SAP_BOVIN; E-value=2.0e-47
0.2793	SEQINDEX6607_C_c_s	Probable phospholipase D family member FLJ33580 homolog OS=Xenopus tropicalis GN=TGas067k05.1 PE=2 SV=1; Accession=YQ008_XENTR; E-value=1.0e-40
0.3304	SEQINDEX7318_C_c_s	JmjC domain-containing protein 5 OS=Rattus norvegicus GN=Jmjd5 PE=2 SV=1; Accession=JMJD5_RAT; E-value=1.0e-15
0.7208	SEQINDEX8781_C_c_s	Peroxiredoxin-6 OS=Gallus gallus GN=PRDX6 PE=2 SV=3; Accession=PRDX6_CHICK; E-value=8.0e-87
NA	GO:0004623	phospholipase A2 activity
0.641	SEQINDEX12576_C_c_s	1-O-acylceramide synthase OS=Mus musculus GN=Lypla3 PE=1 SV=1; Accession=LYPA3_MOUSE; E-value=2.0e-83
1.0981	SEQINDEX15465_C_c_s	Conodipine-M alpha chain OS=Conus magus PE=1 SV=2; Accession=COMA_CONMA; E-value=5.0e-11
1.7289	SEQINDEX2461_C_c_s	Phospholipase A2 OS=Aipysurus laevis PE=2 SV=1; Accession=PA2_AIPLA; E-value=3.0e-16
0.3304	SEQINDEX7318_C_c_s	JmjC domain-containing protein 5 OS=Rattus norvegicus GN=Jmjd5 PE=2 SV=1; Accession=JMJD5_RAT; E-value=1.0e-15
0.7208	SEQINDEX8781_C_c_s	Peroxiredoxin-6 OS=Gallus gallus GN=PRDX6 PE=2 SV=3; Accession=PRDX6_CHICK; E-value=8.0e-87
NA	GO:0005509	calcium ion binding
0.2781	SEQINDEX10192_C_c_s	Synaptotagmin-10 OS=Homo sapiens GN=SYT10 PE=2 SV=1; Accession=SYT10_HUMAN; E-value=2.0e-18
0.0553	SEQINDEX10754_C_c_s	Serine/threonine-protein phosphatase 2A regulatory subunit B'' subunit gamma OS=Danio rerio GN=ppp2r3c PE=2 SV=1; Accession=P2R3C_DANRE; E-value=4.0e-95
0.0556	SEQINDEX10968_C_c_s	Fumarylacetoacetate hydrolase domain-containing protein 1 homolog OS=Dictyostelium discoideum GN=fahd1 PE=3 SV=1; Accession=FAHD1_DICDI; E-value=7.0e-46
0.3657	SEQINDEX1100_C_c_s	Clathrin light chain A OS=Rattus norvegicus GN=Clta PE=1 SV=1; Accession=CLCA_RAT; E-value=6.0e-31
0.5417	SEQINDEX1103_C_c_s	Synaptotagmin-1 OS=Aplysia californica GN=SYT1 PE=1 SV=2; Accession=SY65_APLCA; E-value=1.0e-32
0.7925	SEQINDEX12311_C_c_s	Oncoprotein-induced transcript 3 protein OS=Mus musculus GN=Oit3 PE=2 SV=2; Accession=OIT3_MOUSE; E-value=8.0e-26
0.3393	SEQINDEX12338_C_c_s	Calmodulin OS=Strongylocentrotus intermedius PE=2 SV=3; Accession=CALM_STRIE; E-value=3.0e-32
0.001	SEQINDEX1248_C_c_s	Centrin-3 OS=Homo sapiens GN=CETN3 PE=2 SV=2; Accession=CETN3_HUMAN; E-value=4.0e-73
0.6479	SEQINDEX12677_C_c_s	Calcyphosin-like protein OS=Homo sapiens GN=CAPSL PE=2 SV=2; Accession=CAPSL_HUMAN; E-value=9.0e-52
0.6097	SEQINDEX1312_C_c_s	Allene oxide synthase-lipoxygenase protein OS=Plexaura homomalla PE=1 SV=1; Accession=AOSL_PLEHO; E-value=7.0e-69
0.1899	SEQINDEX13211_C_c_s	Translationally-controlled tumor protein OS=Branchiostoma belcheri PE=2 SV=1; Accession=TCTP_BRABE; E-value=3.0e-31
1.0263	SEQINDEX13512_C_c_s	Hemicentin-1 OS=Homo sapiens GN=HMCN1 PE=1 SV=2; Accession=HMCN1_HUMAN; E-value=1.0e-06
1.0495	SEQINDEX13525_C_c_s	Hemicentin-1 OS=Homo sapiens GN=HMCN1 PE=1 SV=2; Accession=HMCN1_HUMAN; E-value=2.0e-42
0.3199	SEQINDEX13535_C_c_s	Hemicentin-1 OS=Homo sapiens GN=HMCN1 PE=1 SV=2; Accession=HMCN1_HUMAN; E-value=1.0e-29
0.3372	SEQINDEX1409_C_c_s	Calumenin OS=Mus musculus GN=Calu PE=1 SV=1; Accession=CALU_MOUSE; E-value=2.0e-90
0.5002	SEQINDEX1412_C_c_s	Calpain-9 (Fragment) OS=Rattus norvegicus GN=Capn9 PE=2 SV=1; Accession=CAN9_RAT; E-value=1.0e-157
0.2926	SEQINDEX14196_C_c_s	Transketolase-like protein 2 OS=Mus musculus GN=Tktl2 PE=2 SV=1; Accession=TKTL2_MOUSE; E-value=1.0e-125
0.1544	SEQINDEX14388_C_c_s	Ionized calcium-binding adapter molecule 2 OS=Mus musculus GN=Iba2 PE=2 SV=1; Accession=IBA2_MOUSE; E-value=2.0e-29
0.1965	SEQINDEX14391_C_c_s	Testican-2 OS=Mus musculus GN=Spock2 PE=2 SV=1; Accession=TICN2_MOUSE; E-value=3.0e-15
0.2297	SEQINDEX14474_C_c_s	Coagulation factor V OS=Sus scrofa GN=F5 PE=2 SV=1; Accession=FA5_PIG; E-value=7.0e-26
0.7431	SEQINDEX14734_C_c_s	Calmodulin OS=Prorocentrum minimum PE=2 SV=1; Accession=CALM_PROMN; E-value=4.0e-19
0.4502	SEQINDEX14740_C_c_s	Neuronal acetylcholine receptor subunit alpha-10 OS=Gallus gallus GN=CHRNA10 PE=3 SV=1; Accession=ACH10_CHICK; E-value=6.0e-43
0.2323	SEQINDEX14744_C_c_s	Neuronal acetylcholine receptor subunit alpha-10 OS=Gallus gallus GN=CHRNA10 PE=3 SV=1; Accession=ACH10_CHICK; E-value=4.0e-71
0.7648	SEQINDEX1517_C_c_s	Calumenin OS=Homo sapiens GN=CALU PE=1 SV=2; Accession=CALU_HUMAN; E-value=8.0e-32
0.0813	SEQINDEX1518_C_c_s	Calumenin OS=Homo sapiens GN=CALU PE=1 SV=2; Accession=CALU_HUMAN; E-value=1.0e-46
0.0756	SEQINDEX15185_C_c_s	EH domain-containing protein 3 OS=Homo sapiens GN=EHD3 PE=1 SV=1; Accession=EHD3_HUMAN; E-value=1.0e-156
0.5757	SEQINDEX1520_C_c_s	Calumenin OS=Mus musculus GN=Calu PE=1 SV=1; Accession=CALU_MOUSE; E-value=3.0e-25
0.001	SEQINDEX15319_C_c_s	Alpha-actinin-4 OS=Rattus norvegicus GN=Actn4 PE=1 SV=2; Accession=ACTN4_RAT; E-value=1.0e-133
0.7593	SEQINDEX15323_C_c_s	Protein jagged-1 OS=Rattus norvegicus GN=Jag1 PE=2 SV=2; Accession=JAG1_RAT; E-value=4.0e-27
1.0981	SEQINDEX15465_C_c_s	Conodipine-M alpha chain OS=Conus magus PE=1 SV=2; Accession=COMA_CONMA; E-value=5.0e-11
0.1593	SEQINDEX15534_C_c_s	Peflin OS=Homo sapiens GN=PEF1 PE=1 SV=1; Accession=PEF1_HUMAN; E-value=6.0e-45
0.0831	SEQINDEX15831_C_c_s	Dystrophin, isoforms A/C/F/G OS=Drosophila melanogaster GN=Dys PE=1 SV=2; Accession=DMDA_DROME; E-value=6.0e-72
0.0528	SEQINDEX16392_C_c_s	Calcium and integrin-binding family member 2 OS=Mus musculus GN=Cib2 PE=2 SV=1; Accession=CIB2_MOUSE; E-value=4.0e-40
0.2017	SEQINDEX2037_C_c_s	Transient receptor potential cation channel subfamily M member 2 OS=Homo sapiens GN=TRPM2 PE=1 SV=2; Accession=TRPM2_HUMAN; E-value=3.0e-61
0.2045	SEQINDEX2259_C_c_s	Calmodulin OS=Tetrahymena pyriformis PE=1 SV=4; Accession=CALM_TETPY; E-value=1.0e-28
2	SEQINDEX2323_C_c_s	Cartilage matrix protein OS=Gallus gallus GN=MATN1 PE=1 SV=2; Accession=MATN1_CHICK; E-value=9.0e-08
0.2444	SEQINDEX2364_C_c_s	Calretinin OS=Gallus gallus GN=CALB2 PE=2 SV=3; Accession=CALB2_CHICK; E-value=8.0e-57
0.2597	SEQINDEX2367_C_c_s	Neurogenic locus Notch protein OS=Drosophila melanogaster GN=N PE=1 SV=3; Accession=NOTCH_DROME; E-value=2.0e-26
0.2713	SEQINDEX2404_C_c_s	Endoplasmin OS=Gallus gallus GN=HSP90B1 PE=1 SV=1; Accession=ENPL_CHICK; E-value=1.0e-153
1.7289	SEQINDEX2461_C_c_s	Phospholipase A2 OS=Aipysurus laevis PE=2 SV=1; Accession=PA2_AIPLA; E-value=3.0e-16
0.0592	SEQINDEX262_C_c_s	Protein naked cuticle homolog 2-B OS=Danio rerio GN=nkd2b PE=2 SV=1; Accession=NKD2B_DANRE; E-value=4.0e-16
0.2544	SEQINDEX2699_C_c_s	Programmed cell death protein 6 OS=Mus musculus GN=Pdcd6 PE=1 SV=2; Accession=PDCD6_MOUSE; E-value=9.0e-57
0.001	SEQINDEX2750_C_c_s	Protein disulfide-isomerase A4 OS=Homo sapiens GN=PDIA4 PE=1 SV=2; Accession=PDIA4_HUMAN; E-value=3.0e-40
0.3363	SEQINDEX2782_C_c_s	Glucosidase 2 subunit beta OS=Homo sapiens GN=PRKCSH PE=1 SV=2; Accession=GLU2B_HUMAN; E-value=7.0e-51
0.3485	SEQINDEX2909_C_c_s	Arylsulfatase B OS=Homo sapiens GN=ARSB PE=1 SV=1; Accession=ARSB_HUMAN; E-value=1.0e-127
0.163	SEQINDEX2970_C_c_s	Translocon-associated protein subunit alpha OS=Canis familiaris GN=SSR1 PE=1 SV=1; Accession=SSRA_CANFA; E-value=4.0e-36
1.0022	SEQINDEX3049_C_c_s	Calsequestrin-1 OS=Gallus gallus GN=CASQ1 PE=1 SV=1; Accession=CASQ1_CHICK; E-value=5.0e-36
0.0632	SEQINDEX3084_C_c_s	Plasma membrane calcium-transporting ATPase 1 OS=Rattus norvegicus GN=Atp2b1 PE=2 SV=2; Accession=AT2B1_RAT; E-value=2.0e-63
0.3312	SEQINDEX3180_C_c_s	Neurogenic locus notch protein homolog OS=Xenopus laevis GN=notch1 PE=1 SV=3; Accession=NOTCH_XENLA; E-value=3.0e-13
0.4061	SEQINDEX3238_C_c_s	Hatching enzyme OS=Paracentrotus lividus PE=1 SV=1; Accession=HE_PARLI; E-value=5.0e-39
0.7994	SEQINDEX3242_C_c_s	Trichohyalin OS=Ovis aries GN=TCHH PE=2 SV=2; Accession=TRHY_SHEEP; E-value=1.0e-07
0.8621	SEQINDEX3264_C_c_s	Sarcoplasmic reticulum histidine-rich calcium-binding protein OS=Homo sapiens GN=HRC PE=2 SV=1; Accession=SRCH_HUMAN; E-value=3.0e-15
0.4424	SEQINDEX3310_C_c_s	Calmodulin OS=Suberites domuncula PE=2 SV=3; Accession=CALM_SUBDO; E-value=6.0e-32
1.8191	SEQINDEX3318_C_c_s	SPARC-like protein 1 OS=Rattus norvegicus GN=Sparcl1 PE=2 SV=1; Accession=SPRL1_RAT; E-value=2.0e-10
0.0769	SEQINDEX3342_C_c_s	Calnexin OS=Canis familiaris GN=CANX PE=1 SV=3; Accession=CALX_CANFA; E-value=1.0e-147
0.3058	SEQINDEX3441_C_c_s	Calmodulin-2 OS=Petunia hybrida GN=CAM72 PE=2 SV=2; Accession=CALM2_PETHY; E-value=2.0e-31
0.4686	SEQINDEX3532_C_c_s	Myosin regulatory light chain 2, smooth muscle isoform OS=Pongo abelii GN=MYL9 PE=2 SV=3; Accession=MLRN_PONAB; E-value=9.0e-67
0.001	SEQINDEX3558_C_c_s	Inositol 1,4,5-trisphosphate receptor type 1 OS=Rattus norvegicus GN=Itpr1 PE=1 SV=2; Accession=ITPR1_RAT; E-value=1.0e-148
0.2065	SEQINDEX3888_C_c_s	Amiloride-sensitive amine oxidase [copper-containing] OS=Rattus norvegicus GN=Abp1 PE=2 SV=1; Accession=ABP1_RAT; E-value=1.0e-142
0.2551	SEQINDEX3898_C_c_s	Hippocalcin-like protein 1 OS=Homo sapiens GN=HPCAL1 PE=2 SV=3; Accession=HPCL1_HUMAN; E-value=5.0e-51
0.1139	SEQINDEX3970_C_c_s	Calbindin-32 OS=Drosophila melanogaster GN=Cbp53E PE=2 SV=1; Accession=CAB32_DROME; E-value=3.0e-45
0.8009	SEQINDEX3971_C_c_s	Calbindin-32 OS=Drosophila melanogaster GN=Cbp53E PE=2 SV=1; Accession=CAB32_DROME; E-value=8.0e-22
0.1274	SEQINDEX4035_C_c_s	Neurocalcin homolog OS=Drosophila melanogaster GN=Nca PE=1 SV=2; Accession=NCAH_DROME; E-value=1.0e-90
0.8161	SEQINDEX4040_C_c_s	Epidermal growth factor receptor substrate 15 OS=Homo sapiens GN=EPS15 PE=1 SV=2; Accession=EP15_HUMAN; E-value=3.0e-20
0.1159	SEQINDEX4102_C_c_s	Caltractin (Fragment) OS=Tetraselmis striata PE=2 SV=1; Accession=CATR_TETST; E-value=2.0e-40
0.436	SEQINDEX4178_C_c_s	Utrophin OS=Homo sapiens GN=UTRN PE=1 SV=1; Accession=UTRO_HUMAN; E-value=1.0e-43
0.2898	SEQINDEX4179_C_c_s	Utrophin OS=Homo sapiens GN=UTRN PE=1 SV=1; Accession=UTRO_HUMAN; E-value=1.0e-52
1.6933	SEQINDEX4261_C_c_s	Transient-receptor-potential-like protein OS=Drosophila melanogaster GN=trpl PE=1 SV=2; Accession=TRPL_DROME; E-value=1.0e-07
1.3675	SEQINDEX4337_C_c_s	Ectonucleoside triphosphate diphosphohydrolase 1 OS=Homo sapiens GN=ENTPD1 PE=1 SV=1; Accession=ENTP1_HUMAN; E-value=2.0e-40
0.1014	SEQINDEX4405_C_c_s	Matrix metalloproteinase-24 OS=Rattus norvegicus GN=Mmp24 PE=2 SV=1; Accession=MMP24_RAT; E-value=3.0e-75
0.2104	SEQINDEX4514_C_c_s	Coatomer subunit alpha OS=Homo sapiens GN=COPA PE=1 SV=1; Accession=COPA_HUMAN; E-value=1.0e-128
0.001	SEQINDEX4548_C_c_s	Myosin-2 essential light chain OS=Drosophila melanogaster GN=Mlc-c PE=1 SV=1; Accession=MLC2_DROME; E-value=3.0e-25
0.001	SEQINDEX4549_C_c_s	Myosin-2 essential light chain OS=Drosophila melanogaster GN=Mlc-c PE=1 SV=1; Accession=MLC2_DROME; E-value=4.0e-42
0.0546	SEQINDEX4550_C_c_s	Myosin-2 essential light chain OS=Drosophila melanogaster GN=Mlc-c PE=1 SV=1; Accession=MLC2_DROME; E-value=4.0e-25
0.1048	SEQINDEX459_C_c_s	Peroxidasin homolog OS=Caenorhabditis briggsae GN=pxn-1 PE=3 SV=1; Accession=PXDN_CAEBR; E-value=2.0e-39
0.4749	SEQINDEX4590_C_c_s	Neurocan core protein OS=Rattus norvegicus GN=Ncan PE=1 SV=1; Accession=NCAN_RAT; E-value=2.0e-16
0.6958	SEQINDEX4683_C_c_s	Sodium/calcium exchanger 3 OS=Homo sapiens GN=SLC8A3 PE=2 SV=2; Accession=NAC3_HUMAN; E-value=3.0e-34
0.2164	SEQINDEX4770_C_c_s	Calcium-binding protein p22 OS=Rattus norvegicus GN=Chp PE=1 SV=2; Accession=CHP1_RAT; E-value=2.0e-51
0.4473	SEQINDEX4804_C_c_s	Calmodulin OS=Renilla reniformis PE=1 SV=2; Accession=CALM_RENRE; E-value=2.0e-35
0.001	SEQINDEX4842_C_c_s	Calcineurin subunit B type 1 OS=Rattus norvegicus GN=Ppp3r1 PE=1 SV=2; Accession=CANB1_RAT; E-value=1.0e-62
0.2068	SEQINDEX5010_C_c_s	Nucleobindin-2 OS=Mus musculus GN=Nucb2 PE=1 SV=2; Accession=NUCB2_MOUSE; E-value=1.0e-56
0.0298	SEQINDEX5039_C_c_s	Troponin C, skeletal muscle OS=Anguilla anguilla PE=1 SV=1; Accession=TNNC2_ANGAN; E-value=1.0e-11
0.3219	SEQINDEX5197_C_c_s	Tolloid-like protein 2 OS=Mus musculus GN=Tll2 PE=1 SV=1; Accession=TLL2_MOUSE; E-value=5.0e-27
0.2201	SEQINDEX5212_C_c_s	Low-density lipoprotein receptor-related protein 1 OS=Gallus gallus GN=LRP1 PE=2 SV=1; Accession=LRP1_CHICK; E-value=3.0e-17
0.1235	SEQINDEX6474_C_c_s	Severin OS=Echinococcus granulosus GN=AG8 PE=2 SV=3; Accession=SEVE_ECHGR; E-value=7.0e-72
0.3163	SEQINDEX6646_C_c_s	Annexin A13 OS=Canis familiaris GN=ANXA13 PE=1 SV=2; Accession=ANX13_CANFA; E-value=6.0e-52
0.3421	SEQINDEX6677_C_c_s	Oncoprotein-induced transcript 3 protein OS=Bos taurus GN=OIT3 PE=2 SV=1; Accession=OIT3_BOVIN; E-value=1.0e-34
0.2988	SEQINDEX6678_C_c_s	Oncoprotein-induced transcript 3 protein OS=Bos taurus GN=OIT3 PE=2 SV=1; Accession=OIT3_BOVIN; E-value=6.0e-24
0.163	SEQINDEX6744_C_c_s	Fumarylacetoacetate hydrolase domain-containing protein 2 OS=Bos taurus GN=FAHD2 PE=2 SV=1; Accession=FAHD2_BOVIN; E-value=7.0e-90
0.6788	SEQINDEX6926_C_c_s	Glutamyl aminopeptidase OS=Bos taurus GN=ENPEP PE=2 SV=1; Accession=AMPE_BOVIN; E-value=1.0e-40
0.1787	SEQINDEX7009_C_c_s	EF-hand calcium-binding domain-containing protein 1 OS=Xenopus laevis GN=efcab1 PE=2 SV=1; Accession=EFCB1_XENLA; E-value=2.0e-48
0.3906	SEQINDEX7092_C_c_s	Calumenin OS=Bos taurus GN=CALU PE=2 SV=1; Accession=CALU_BOVIN; E-value=4.0e-55
1.6469	SEQINDEX7200_C_c_s	Peroxidasin homolog OS=Mus musculus GN=Pxdn PE=2 SV=1; Accession=PXDN_MOUSE; E-value=3.0e-81
0.1434	SEQINDEX7309_C_c_s	Cysteine and histidine-rich domain-containing protein 1 OS=Bos taurus GN=CHORDC1 PE=2 SV=1; Accession=CHRD1_BOVIN; E-value=2.0e-43
0.3304	SEQINDEX7318_C_c_s	JmjC domain-containing protein 5 OS=Rattus norvegicus GN=Jmjd5 PE=2 SV=1; Accession=JMJD5_RAT; E-value=1.0e-15
0.1708	SEQINDEX7593_C_c_s	Uncharacterized protein C6orf166 OS=Homo sapiens GN=C6orf166 PE=1 SV=2; Accession=CF166_HUMAN; E-value=7.0e-25
1.1119	SEQINDEX7679_C_c_s	EF-hand domain-containing protein C14orf143 homolog OS=Danio rerio GN=zgc:110317 PE=2 SV=1; Accession=CN143_DANRE; E-value=5.0e-23
0.1184	SEQINDEX8010_C_c_s	EF-hand domain-containing protein 1 OS=Homo sapiens GN=EFHC1 PE=1 SV=1; Accession=EFHC1_HUMAN; E-value=1.0e-178
0.6796	SEQINDEX8126_C_c_s	Sorcin OS=Pongo abelii GN=SRI PE=2 SV=1; Accession=SORCN_PONAB; E-value=5.0e-52
0.1255	SEQINDEX8207_C_c_s	FK506-binding protein 9 OS=Mus musculus GN=Fkbp9 PE=1 SV=1; Accession=FKBP9_MOUSE; E-value=1.0e-25
0.1467	SEQINDEX8209_C_c_s	FK506-binding protein 14 OS=Pongo abelii GN=FKBP14 PE=2 SV=1; Accession=FKB14_PONAB; E-value=2.0e-38
0.3408	SEQINDEX9194_C_c_s	Macrophage mannose receptor 2 OS=Rattus norvegicus GN=Mrc2 PE=1 SV=1; Accession=MRC2_RAT; E-value=6.0e-20
0.2197	SEQINDEX9277_C_c_s	Signal peptide, CUB and EGF-like domain-containing protein 3 OS=Mus musculus GN=Scube3 PE=1 SV=1; Accession=SCUB3_MOUSE; E-value=4.0e-15
0.1732	SEQINDEX9355_C_c_s	Switch-associated protein 70 OS=Mus musculus GN=Swap70 PE=1 SV=2; Accession=SWP70_MOUSE; E-value=1.0e-38
0.5801	SEQINDEX9561_C_c_s	Multiple C2 and transmembrane domain-containing protein 1 OS=Homo sapiens GN=MCTP1 PE=2 SV=1; Accession=MCTP1_HUMAN; E-value=1.0e-139
0.001	SEQINDEX9783_C_c_s	Mitochondrial Rho GTPase 1-A OS=Danio rerio GN=rhot1a PE=2 SV=1; Accession=MIRO1_DANRE; E-value=1.0e-127
NA	GO:0004714;GO:0005021;GO:0019199	transmembrane receptor protein tyrosine kinase activity;vascular endothelial growth factor receptor activity;transmembrane receptor protein kinase activity
0.5604	SEQINDEX1063_C_c_s	Muscle M-line assembly protein unc-89 OS=Caenorhabditis elegans GN=unc-89 PE=1 SV=3; Accession=UNC89_CAEEL; E-value=6.0e-08
0.509	SEQINDEX12205_C_c_s	Neuropilin-1a OS=Danio rerio GN=nrp1a PE=2 SV=1; Accession=NRP1A_DANRE; E-value=2.0e-20
1.0263	SEQINDEX13512_C_c_s	Hemicentin-1 OS=Homo sapiens GN=HMCN1 PE=1 SV=2; Accession=HMCN1_HUMAN; E-value=1.0e-06
1.0495	SEQINDEX13525_C_c_s	Hemicentin-1 OS=Homo sapiens GN=HMCN1 PE=1 SV=2; Accession=HMCN1_HUMAN; E-value=2.0e-42
0.3199	SEQINDEX13535_C_c_s	Hemicentin-1 OS=Homo sapiens GN=HMCN1 PE=1 SV=2; Accession=HMCN1_HUMAN; E-value=1.0e-29
NA	GO:0004857	enzyme inhibitor activity
1.0493	SEQINDEX10498_C_c_s	Cysteine-rich motor neuron 1 protein OS=Danio rerio GN=crim1 PE=2 SV=1; Accession=CRIM1_DANRE; E-value=1.0e-14
0.0586	SEQINDEX11774_C_c_s	C3 and PZP-like alpha-2-macroglobulin domain-containing protein 8 OS=Homo sapiens GN=CPAMD8 PE=1 SV=1; Accession=CPMD8_HUMAN; E-value=1.0e-43
0.7792	SEQINDEX13039_C_c_s	Tribbles homolog 2 OS=Homo sapiens GN=TRIB2 PE=2 SV=1; Accession=TRIB2_HUMAN; E-value=3.0e-99
0.001	SEQINDEX1505_C_c_s	TP53-regulated inhibitor of apoptosis 1 OS=Homo sapiens GN=TRIAP1 PE=1 SV=1; Accession=TRIA1_HUMAN; E-value=4.0e-16
0.8085	SEQINDEX1909_C_c_s	Papilin OS=Caenorhabditis elegans GN=ppn-1 PE=1 SV=1; Accession=PPN1_CAEEL; E-value=1.0e-12
0.4648	SEQINDEX2180_C_c_s	Serine protease inhibitor dipetalogastin (Fragment) OS=Dipetalogaster maximus PE=1 SV=2; Accession=DPGN_DIPMA; E-value=2.0e-28
0.7768	SEQINDEX261_C_c_s	Regulator of ribonuclease activity A OS=Pseudomonas mendocina (strain ymp) GN=rraA PE=3 SV=1; Accession=RRAA_PSEMY; E-value=2.0e-46
0.2587	SEQINDEX3422_C_c_s	Metalloproteinase inhibitor 3 OS=Gallus gallus GN=TIMP3 PE=1 SV=2; Accession=TIMP3_CHICK; E-value=3.0e-12
0.5592	SEQINDEX4338_C_c_s	Type-2 angiotensin II receptor OS=Homo sapiens GN=AGTR2 PE=1 SV=1; Accession=AGTR2_HUMAN; E-value=3.0e-25
0.3864	SEQINDEX4925_C_c_s	Caspase-3 OS=Mus musculus GN=Casp3 PE=1 SV=1; Accession=CASP3_MOUSE; E-value=1.0e-40
0.3241	SEQINDEX5840_C_c_s	Arrestin domain-containing protein 3 OS=Bos taurus GN=ARRDC3 PE=2 SV=1; Accession=ARRD3_BOVIN; E-value=2.0e-23
0.4877	SEQINDEX6868_C_c_s	Complement C3 OS=Bos taurus GN=C3 PE=1 SV=2; Accession=CO3_BOVIN; E-value=1.0e-14
0.5612	SEQINDEX7540_C_c_s	Coiled-coil domain-containing protein 58 OS=Homo sapiens GN=CCDC58 PE=1 SV=1; Accession=CCD58_HUMAN; E-value=8.0e-31
NA	GO:0004872	receptor activity
0.5604	SEQINDEX1063_C_c_s	Muscle M-line assembly protein unc-89 OS=Caenorhabditis elegans GN=unc-89 PE=1 SV=3; Accession=UNC89_CAEEL; E-value=6.0e-08
0.509	SEQINDEX12205_C_c_s	Neuropilin-1a OS=Danio rerio GN=nrp1a PE=2 SV=1; Accession=NRP1A_DANRE; E-value=2.0e-20
0.3064	SEQINDEX13038_C_c_s	Estradiol 17-beta-dehydrogenase 8 OS=Homo sapiens GN=HSD17B8 PE=1 SV=2; Accession=DHB8_HUMAN; E-value=5.0e-71
1.0263	SEQINDEX13512_C_c_s	Hemicentin-1 OS=Homo sapiens GN=HMCN1 PE=1 SV=2; Accession=HMCN1_HUMAN; E-value=1.0e-06
1.0495	SEQINDEX13525_C_c_s	Hemicentin-1 OS=Homo sapiens GN=HMCN1 PE=1 SV=2; Accession=HMCN1_HUMAN; E-value=2.0e-42
0.3199	SEQINDEX13535_C_c_s	Hemicentin-1 OS=Homo sapiens GN=HMCN1 PE=1 SV=2; Accession=HMCN1_HUMAN; E-value=1.0e-29
0.2864	SEQINDEX13756_C_c_s	Selenoprotein S OS=Homo sapiens GN=SELS PE=1 SV=3; Accession=SELS_HUMAN; E-value=5.0e-13
1.3241	SEQINDEX14302_C_c_s	Plexin domain-containing protein 2 OS=Mus musculus GN=Plxdc2 PE=1 SV=1; Accession=PXDC2_MOUSE; E-value=4.0e-32
0.081	SEQINDEX14492_C_c_s	Neuropeptide FF receptor 1 OS=Homo sapiens GN=NPFFR1 PE=1 SV=1; Accession=NPFF1_HUMAN; E-value=2.0e-32
0.2298	SEQINDEX14726_C_c_s	Steroid receptor RNA activator 1 OS=Homo sapiens GN=SRA1 PE=1 SV=1; Accession=SRA1_HUMAN; E-value=1.0e-13
0.4502	SEQINDEX14740_C_c_s	Neuronal acetylcholine receptor subunit alpha-10 OS=Gallus gallus GN=CHRNA10 PE=3 SV=1; Accession=ACH10_CHICK; E-value=6.0e-43
0.2323	SEQINDEX14744_C_c_s	Neuronal acetylcholine receptor subunit alpha-10 OS=Gallus gallus GN=CHRNA10 PE=3 SV=1; Accession=ACH10_CHICK; E-value=4.0e-71
1.3714	SEQINDEX14752_C_c_s	Frizzled-1 OS=Xenopus laevis GN=fzd1 PE=2 SV=1; Accession=FZD1_XENLA; E-value=9.0e-39
0.001	SEQINDEX14769_C_c_s	WD repeat-containing protein 31 OS=Mus musculus GN=Wdr31 PE=2 SV=1; Accession=WDR31_MOUSE; E-value=1.0e-19
0.3221	SEQINDEX15378_C_c_s	Autocrine motility factor receptor OS=Mus musculus GN=Amfr PE=1 SV=2; Accession=AMFR_MOUSE; E-value=1.0e-43
0.1515	SEQINDEX15562_C_c_s	Translocation protein SEC63 homolog OS=Pongo abelii GN=SEC63 PE=2 SV=1; Accession=SEC63_PONAB; E-value=1.0e-125
0.001	SEQINDEX15694_C_c_s	Frizzled-4 OS=Homo sapiens GN=FZD4 PE=1 SV=2; Accession=FZD4_HUMAN; E-value=1.0e-139
0.3758	SEQINDEX2027_C_c_s	Thyrotropin-releasing hormone receptor OS=Gallus gallus GN=TRHR PE=2 SV=1; Accession=TRFR_CHICK; E-value=6.0e-09
0.2597	SEQINDEX2367_C_c_s	Neurogenic locus Notch protein OS=Drosophila melanogaster GN=N PE=1 SV=3; Accession=NOTCH_DROME; E-value=2.0e-26
0.24	SEQINDEX2414_C_c_s	Signal recognition particle receptor subunit alpha OS=Mus musculus GN=Srpr PE=2 SV=1; Accession=SRPR_MOUSE; E-value=1.0e-35
0.7309	SEQINDEX31_C_c_s	DNA-directed RNA polymerase III subunit RPC9 OS=Bos taurus GN=CRCP PE=2 SV=1; Accession=RPC9_BOVIN; E-value=8.0e-22
0.001	SEQINDEX3558_C_c_s	Inositol 1,4,5-trisphosphate receptor type 1 OS=Rattus norvegicus GN=Itpr1 PE=1 SV=2; Accession=ITPR1_RAT; E-value=1.0e-148
0.2307	SEQINDEX3577_C_c_s	Translocator protein OS=Homo sapiens GN=TSPO PE=1 SV=2; Accession=TSPO_HUMAN; E-value=7.0e-31
0.3909	SEQINDEX3801_C_c_s	Somatostatin receptor type 5 OS=Homo sapiens GN=SSTR5 PE=1 SV=3; Accession=SSR5_HUMAN; E-value=9.0e-13
0.5592	SEQINDEX4338_C_c_s	Type-2 angiotensin II receptor OS=Homo sapiens GN=AGTR2 PE=1 SV=1; Accession=AGTR2_HUMAN; E-value=3.0e-25
0.2061	SEQINDEX4415_C_c_s	P2X purinoceptor 4 OS=Rattus norvegicus GN=P2rx4 PE=1 SV=1; Accession=P2RX4_RAT; E-value=1.0e-106
0.001	SEQINDEX468_C_c_s	Prohibitin-2 OS=Xenopus tropicalis GN=phb2 PE=2 SV=1; Accession=PHB2_XENTR; E-value=1.0e-103
0.6228	SEQINDEX5202_C_c_s	Enteropeptidase OS=Bos taurus GN=PRSS7 PE=1 SV=1; Accession=ENTK_BOVIN; E-value=2.0e-16
0.2201	SEQINDEX5212_C_c_s	Low-density lipoprotein receptor-related protein 1 OS=Gallus gallus GN=LRP1 PE=2 SV=1; Accession=LRP1_CHICK; E-value=3.0e-17
0.9767	SEQINDEX6872_C_c_s	Toll-like receptor 2 OS=Boselaphus tragocamelus GN=TLR2 PE=2 SV=1; Accession=TLR2_BOSTR; E-value=4.0e-13
0.4116	SEQINDEX7350_C_c_s	Signal recognition particle receptor subunit beta OS=Rattus norvegicus GN=Srprb PE=2 SV=1; Accession=SRPRB_RAT; E-value=3.0e-44
0.0915	SEQINDEX7574_C_c_s	Photoreceptor-specific nuclear receptor OS=Mus musculus GN=Nr2e3 PE=2 SV=1; Accession=NR2E3_MOUSE; E-value=1.0e-52
1.0224	SEQINDEX8122_C_c_s	Translocation protein SEC62 OS=Pongo abelii GN=SEC62 PE=2 SV=1; Accession=SEC62_PONAB; E-value=3.0e-61
1.0339	SEQINDEX8700_C_c_s	Membrane-associated progesterone receptor component 2 OS=Rattus norvegicus GN=Pgrmc2 PE=1 SV=1; Accession=PGRC2_RAT; E-value=4.0e-21
0.0993	SEQINDEX8701_C_c_s	Membrane-associated progesterone receptor component 2 OS=Rattus norvegicus GN=Pgrmc2 PE=1 SV=1; Accession=PGRC2_RAT; E-value=1.0e-34
0.001	SEQINDEX8913_C_c_s	COUP transcription factor 1 OS=Mus musculus GN=Nr2f1 PE=2 SV=2; Accession=COT1_MOUSE; E-value=1.0e-146
0.3408	SEQINDEX9194_C_c_s	Macrophage mannose receptor 2 OS=Rattus norvegicus GN=Mrc2 PE=1 SV=1; Accession=MRC2_RAT; E-value=6.0e-20
0.1881	SEQINDEX9209_C_c_s	P2X purinoceptor 7 OS=Rattus norvegicus GN=P2rx7 PE=2 SV=1; Accession=P2RX7_RAT; E-value=7.0e-06
0.6206	SEQINDEX9380_C_c_s	Renin receptor OS=Rattus norvegicus GN=Atp6ap2 PE=2 SV=1; Accession=RENR_RAT; E-value=2.0e-08
0.2991	SEQINDEX9447_C_c_s	Progestin and adipoQ receptor family member 9 OS=Homo sapiens GN=PAQR9 PE=2 SV=1; Accession=PAQR9_HUMAN; E-value=1.0e-23
NA	GO:0004497	monooxygenase activity
0.457	SEQINDEX10153_C_c_s	Cytochrome P450 20A1 OS=Homo sapiens GN=CYP20A1 PE=2 SV=1; Accession=CP20A_HUMAN; E-value=5.0e-17
0.2887	SEQINDEX13217_C_c_s	Cytochrome P450 74A, chloroplastic OS=Arabidopsis thaliana GN=CYP74A PE=1 SV=3; Accession=CP74A_ARATH; E-value=7.0e-28
0.6134	SEQINDEX14117_C_c_s	Pterin-4-alpha-carbinolamine dehydratase 2 OS=Mus musculus GN=Pcbd2 PE=1 SV=1; Accession=PHS2_MOUSE; E-value=2.0e-36
0.6106	SEQINDEX3688_C_c_s	Putative tyrosinase-like protein tyr-1 OS=Caenorhabditis elegans GN=tyr-1 PE=1 SV=2; Accession=TYR1_CAEEL; E-value=3.0e-10
0.3033	SEQINDEX4202_C_c_s	Cytochrome P450 3A24 OS=Ovis aries GN=CYP3A24 PE=2 SV=1; Accession=CP3AO_SHEEP; E-value=2.0e-74
0.8034	SEQINDEX5613_C_c_s	DBH-like monooxygenase protein 2 homolog OS=Danio rerio GN=moxd2 PE=2 SV=2; Accession=MOXD2_DANRE; E-value=3.0e-11
0.3919	SEQINDEX6753_C_c_s	Ubiquinone biosynthesis monooxygenase COQ6 OS=Bos taurus GN=COQ6 PE=2 SV=1; Accession=COQ6_BOVIN; E-value=1.0e-73
