# Supplementary material for: Rapid Evolution of Coral Proteins Responsible for Interaction with the Environment
Source: PLoS One. 2011 May 25;6(5):e20392. doi: 10.1371/journal.pone.0020392 (PMC3102110; doi:10.1371/journal.pone.0020392)
Supplement: Table S3 — Orthologs of A. millepora and A. palmata with associated pairwise dN/dS estimates. (XLSX) [file pone.0020392.s006.xlsx]

## Sheet: Orthologs Amil Apal
Table S3. Orthologs of A. millepora and A. palmata with associated pairwise dN/dS estimates
Amil_ID	Amil_nt	Apal_ID	Apal_nt	Amil BLASTx annot Swiss	Amil BLASTx annot Trembl	Amil_1st BLASTp	Amil_2nd BLASTp	dN/dS (M0)
Annotated, BLASTp 1st = BLASTx hit
SEQINDEX10381_C_c	AATTTTGTTTGACTTTCATCTAGTTGTTTGGAAAAGAAGTTTCAGTGGCGAAGATCTGCAGAAGTTGTGGAAAGCTGTTTTTGGACAGGATGACCGACAGAAAAGCCGTAATAAAAAATGCCGATATGACAGAGGATATGCAGCAAGATGCTGTAGAATGTGCAACGCAAGCGATGGAAAAATTCAACATAGAGAAAGACATCGCCGCGTACATTAAGAAAGAATTTGACAAGAAGTATAACCCAACTTGGCATTGTATTGTCGGAAGGAACTTCGGTTCATACGTGACACACGAAACGAAGCATTTCATTTACTTCTACCTTGGACAAGTTGCTGTTCTGCTTTTCAAGTCTGGGTAATAAAATTGTCTGAGAGCGAGAAACAGTTGGTATGCTCTAA…	Contig2317	GGGGAGAGTGGAATTAGTTTCCTATTACGGCGTGGTCATGAAAGTCCAAGGAAGCGATGTTGAATTTTGTTTGACTTTCATCTAGTTGTTTGGAAAAGAAGTTTCAGTGGCGAAGATCTGCAGAAGTTGTGGAAAGCTGTTTTTGGACAGGATGACCGACAGAAAAGCCGTAATAAAAAATGCCGATATGACAGAGGATATGCAGCAAGATGCTGTAGAATGTGCAACGCAAGCGATGGAAAAATTCAACATAGAGAAAGACATCGCCGCGTACATTAAGAAAGAATTTGACAAGAAGTATAACCCAACTTGGCATTGTATTGTCGGAAGGAACTTCGGTTCATACGTGACACACGAAACGAAGCATTTCATTTACTTCTACCTTGGACAAGTTGCTGT…	Dynein light chain 2, cytoplasmic OS=Rattus norvegicus GN=Dynll2 PE=1 SV=1; Accession=DYL2_RAT; E-value=3.0e-45	Q1RM30_DANRE	Q1RM30_DANRE	Q1RM30_DANRE	0.001
SEQINDEX12308_C_c	GAAAAGCTTCGAAGTAATTCGTAACGTTACAATANCTGTTTCTGTGTGGAAACTTTGAACAAAGTTGAATGTGGAGCGTCTTCTGACAAGTCGCTCACGCGGAAACGCACACTTGAAAATTTAAAATTCGTTGTGGTTGTTCCAAGAAAAAATATGTCCCAGCAGATTGATGTAACTGTTCCAGATTCTGAAACATTAAGCTCTGAGAAGTCGAAACGTTTTACGGTATACAAAGTTCTAGTCAACCTCCCTGATGGACGAAGTTACTTCATATTCCGCAGATACAATGAATTCTACAATCTGTATGAAAAGATCAAGAAAGTTTATCCTGAATTAAACATCAAGTTGCCAGGCAAACGACGACTGGGAAATAACTTTGATCCTGAGTTCATTAAAATG…	Contig2309	GGGGTAACGTTACAATACCGTTTCTGTGTGGAAACTTTGAACAAAGTTGAATGTGGAGCGTCTTCTGACAAGTCGCTCACGCGGAAACGCACACTTGAAAATTTAAAATTCGTTGTGGTTGTTCCAAGAAAAAATATGTCCCAGCAGATTGATGTAACTGTTCCAGATTCTGAAACATTAAGCTCTGAGAAGTCGAAACGTTTTACGGTATACAAAGTTCTAGTCAACCTCCCTGATGGACGAAGTTACTTCATATTCCGCAGATACAATGAATTCTACAATCTGTATGAAAAGATCAAGAAAGTTTATCCTGAATTAAACATCAAGTTGCCAGGCAAACGACGACTGGGAAATAACTTTGATCCTGAGTTCATTAAAATGAGAAGAGAAGGACTTAAT…	Serine/threonine-protein kinase Sgk3 OS=Rattus norvegicus GN=Sgk3 PE=2 SV=2; Accession=SGK3_RAT; E-value=1.0e-19	Q5ZJQ4_CHICK	Q5ZJQ4_CHICK	NA	0.001
SEQINDEX4810_C_c	AAAAACAAACTGGTCAAGAACAGAACATTTCTCTTGGCCCTCAGGCCAGTGAAGGTGAACAGATTTTTGCTGTGGCGCATATCTTTGCCTCCTTCAATGACACATTTGTCCATGTCACTGATTTGTCTGGAAAGGAAACAGTTGTGAAAGTGACTGGTGGAATGAAGGTCAAGGCTGATCGTGATGAGGCCTCCCCTTATGCTGCAATGTTGGCTGCCCAGGATGTAGCAGCAAGATGCAAGGAAATTGGTATCACTGCTCTGCATATCAAACTTAGAGCCACTGGAGGCAACAGAACCAAAACCCCTGGTCCAGGTGCCCAGTCTGCCCTAAGAGCTCTTGCGCGTTCAGGAATGAAGATTGGACGTATTGAGGATGTTACTCCCATTCCATCAGACA…	Contig2316	GGGGTCCTTTCCTAACTTGTTGTGAAACTTTCAGTATGGCGCCGAGAAAGGGTCAAAAACAAACTGGTCAAGAACAGAACATTTCTCTTGGCCCTCAGGCCAGTGAAGGTGAACAGATTTTTGCTGTGGCGCATATCTTTGCCTCCTTCAATGACACATTTGTCCATGTCACTGATTTGTCTGGAAAGGAAACAGTTGTGAAAGTGACTGGTGGAATGAAGGTCAAGGCTGATCGTGATGAGGCCTCCCCTTATGCTGCAATGTTGGCTGCCCAGGATGTAGCAGCAAGATGCAAGGAAATTGGTATCACTGCTCTGCATATCAAACTTAGAGCCACTGGAGGCAACAGAACCAAAACCCCTGGTCCAGGTGCCCAGTCTGCCCTAAGAGCTCTTGCGC…	40S ribosomal protein S14 OS=Mus musculus GN=Rps14 PE=2 SV=3; Accession=RS14_MOUSE; E-value=5.0e-53	A7S2J5_NEMVE	A7S2J5_NEMVE	NA	0.1539
SEQINDEX1511_C_c	CTTTGCGAGGGAGACAATATTTTGCATTGGGTGCGATTGCCAAAGCAGTCTCAACAATAATGACATATCCGTTACAAGTGGCTCAGTGCAGACAGAGGTCTGGGCATAAAACACCAAGTGGAAAGGCAGACTTTCTCTCCCAGATGACAAGACTTGTGAGGGAACAAGGCCCGATGGGAATGTATAAAGGCCTGGAAGCCAAGCTACTCCAAACTGTTTTAACAGCAGCTCTGATGTTTGTCGCTTATGAAAAGATAGCAGCTTTTATTTTTAGACTTCTACGCGGGAGCAAAAGATAGCCACCACGAATAAAGACTTTTGTACTTAAACACTAATATGGGGGCTCGGACGTTATCGGACGAATGCAGTTTTGATTGTGAACCCGACTACCAAGAGGTT…	CCHX15941.b1_c_s	GGGGTCTATGAAGCAACAAAGAAGTTTTTGATGAGTGACACAAAAGAGGCTTTGCGAGGGAGACAATATTTTGCATTGGGTGCGATTGCCAAAGCAGTCTCAACAATAATGACATATCCGTTACAAGTGGCTCAGTGCAGACAGAGGTCTGGGCATAAAACACCAAGTGGAAAGGCAGACTTTCTCTCCCAGATGACAAGACTTGTGAGGGAACAAGGCCCGATGGGAATGTATAAAGGCCTGGAAGCCAAGCTACTCCAAACTGTTTTAACAGCAGCTCTGATGTTTGTCGCTTATGAAAAGATAGCAGCTTTTATTTTTAGACTTCTACGCGGGAGCAAAAGATAGCCACCACGAATAATGACTTTTGTACTTAAACACTAATATAGGGGTTCGGAC…	Peroxisomal membrane protein PMP34 OS=Homo sapiens GN=SLC25A17 PE=1 SV=1; Accession=PM34_HUMAN; E-value=3.0e-16	A7SCQ3_NEMVE	A7SCQ3_NEMVE	NA	0.3847
SEQINDEX14409_C_c	TTTATCTTCCCGGAGACGATATTCATGGCTGTGACATCATACCAGAATCATCTCATAACTCGACTCAAGATTTACAGCAATCCATTTGCCAAAGGATTCAGGGATTCCATCAGATTCTCGGGTAACACGGAGAGAGAAAGTTTTCTGATGTCCAACGGCATTCAGGCATTTGAAAATCAAGATAGCACCTACTTAATGTCAACAAGTATGCTGGCACAAGGAACCACCAGGGACTTCTACAGTGATGATTTTTGTCATGTTTCAAATCCGTGTCATTGGGGAACTTGCGGGGATTCCTGTTGTCGAGTAAACGAAGTCACTGTTGCTAACAACCGCTTTCCTCATCCACTCCAGAGCACAGGTTCGAGTAGTATCTACAACAGGGAGCATGCGTGGTGG…	Contig4417	GGGGGACATTTGCATTGCCCAACGCACGGAAATGTCGCATACCCACCGTAAAACGGCGAATTTATCGCACAGAGCTAAAGCATTTTCTATTGCTTCGCTGGTAAACAACGAGGAGCTTGACAATGCAAGCGATGACAAAGCCGTGTTGAGAGGCTCAGCGCAGGAAAAATCACACATTGAGTGTCCTGTACCAAAGAAAAAACTTAAAAGTTTAAAACCGCAGGTTTTCCTTGAAGGCAAAGAGCTCTGGAACTGCTTTTACCGCTTGGGTACAGAAATGATAATCACCAAGACAGGAAGGCGCATGTTTCCAACCCTGCGTGTCTCGTTCGCCGGCTTGGACCCTGCAGCTAACTACGCCATAATTCTCGACATAGTCCAGGTTGACACGAAACGACA…	T-box transcription factor TBX20 OS=Mus musculus GN=Tbx20 PE=2 SV=3; Accession=TBX20_MOUSE; E-value=1.0e-11	A7S668_NEMVE	A7S668_NEMVE	NA	0.3914
SEQINDEX11410_C_c	AAAATGGACTCGTTGAAGACCGTAGCCGCCAAAGTGAAACACAGCCCTAAGGTTATAAGAAAAACGTTTGCCAACCCACAGAAATCTTACAACAAAGTTACAGAAGGCGAGAGAGCTAAAGGCAAAGATGAGGAAGACTGGCTTCATGCTGAAGATTCTTTGAAAGAAGGAATTCATTTTTATGTTAAGATGCTTGGCTCCTGCTCAGTTACTCGAGCACAGGGCACGGGATGTACAGATGAAGCAGTGCATACGATCATAGGAAACACAAAAAAGGCAAAGAATGCTCCTACTGGTGGAAGTCTTCAGAAGGTTCTAATCACCGTTTCAACCCGTAAACTACTTGTTCAAGACATGATTACAAAGGAAAAAATAATGGATATTCCCATATATCGGATA…	Contig2491	GGGAACGCACCGATGATACAGGTTACACAAGATTACCCTTCAACAGCAGCCGCGATGCAAGATTCAGCGAAAAAACTCGAGGCATTGGACCTTGCTGTTGATGACTTTGACGATTTTGATGCAGAATTTACAAAGTTGGCTGAATCCCGTTCAAATCCAAACCTGTTCGAAACACCTGTACGTAGACAGGATTTTATGGATGATGTGAATCATCTCATGGCAACGGAAGCCACAGCCAAACAGTTAATGATGTCCAAATCAAGTGAAGATCTTAGTTTTATATAAAGGCAATGATGCAGCCATCGTATCAGATTAAAGACACAAATAGGGAGCTTAAGGCTTCGTCTTCACATTACACGATTCACAAATCTGTCATTAAATGAAATCTTCATCCTCAGC…	Low density lipoprotein receptor adapter protein 1 OS=Mus musculus GN=Ldlrap1 PE=1 SV=2; Accession=ARH_MOUSE; E-value=2.0e-29	A7S2P5_NEMVE	A7S2P5_NEMVE	A7S2P5_NEMVE	0.3927
SEQINDEX9302_C_c	CGAATGGTGAATGACTTAGCAGCGAAAGTATCTCGCTTGAAAGGGATTGCAATTGACATTGAGAATGAATCCAAACAGCAAAATAATTACCTTGATGGAATGGGAGATGAGTTTGGCAGCTCTTCAAGTTTATTAAGTGGCAGTGCAGCCCGCCTTTCAAAAATGATTAACTCTGGACGATCAAACAGAAAAGTCATGTGTTACCTAATAGCTGGGCTGGTGGGACTTTTCATCGTTGGATATTATGCACTCAGTAAAGTTATCATCAAGTAGCAAAAAGCCAAGAGAATAATGTCATCCTGTGGTTTTCTTCTTTTCTTTGTCAAGCATCATGCAGAGGACCTAATGTCTCTTTGTTCAAAATTTAAAATCTTAGCCAGGGAAAACATTGTCTTTCTT…	CCHX6327.b1_c_s	GGGGAAACAAACACAAGTCCAAGATGGCGACTCGAGGCTCTAGAAGTACATCGACAGATGAAATGCTAGAGACAGAAAACAATCGAATGGTGAATGACTTAGCAGCGAAAGTATCTCGCTTGAAAGGGATTGCAATTGACATTGAGAATGAATCCAAACAGCAAAATAATTACCTTGATGGAATGGGAGATGAGTTTGGCAGCTCTTCAAGTTTATTAAGTGGCAGTGCAGCCCGCCTTTCAAAAATGATTAACTCTGGACGATCAAACAGAAAAGTCATGTGTTACCTAATAGCTGGGCTGGTGGGACTTTTCATCGTTGGATATTATGCACTCAGTAAAGTTATCATCAAGTAGCAAAAAGCCAAGAGAATAATGTCATCCTGTGGTTTTCTTCTTT…	BET1-like protein OS=Danio rerio GN=bet1l PE=3 SV=1; Accession=BET1L_DANRE; E-value=3.0e-14	A7S5H3_NEMVE	A7S5H3_NEMVE	NA	0.4198
SEQINDEX10741_C_c	AATTTTCAGAGGTAAACAATACCTTAACGCAATCACGAACTGAGCAAATGCGTCGAAGCGAACTGTTACGATTAATTTCAACCATGTCATGTCATCGACTTGAAGCGATTATTATCGTGAAATTCGATTATAGCAACACGGTCTTCTGAAAATTCAAAGGTATAGCGCATCGAAAAGAAACAGAAATCGCGTGAAACTATACACGGGACAAATCAACTACCGAAAGAACGCGTTGGTTGTCTTCGGAAGCGGACGGAATTTAAGGAAGGAAAACCTTTCTTGTTATAGTAGCGAGGTGGGTTTGCGTATGATATTACTTGTCAATAGTTTCGTCTTCGACGCGTGATCGTTNCAGGTAAACTCTGTCTTCGGCTTCATTCTTATTTGAAGGTGATTTTC…	CCHX8222.b1_c_s	GGGGAATTTCGACCATGTCATGTCATCGACTTGAAGCGATTATTATCGTGAAATTCGATTATAGCAACACGGTCTTCTGAAAATTCAAAGGTATAGCGCATCGAAAAGAAACAGAAATCGCGTGAAACTATACACGGGACAAATCAACTACCGAAAGAACGCGTTGGTTGTCTTCGGAAGCGGACGGAATCAAATTTAAGGAAGGAGAACCTTTCTTGTTATAGTAGCGAGGTGATTTTCGACTTGCGAAATCGTGCTGATCGATTTGACAGACGATGGAATCGACTAAGCCCTTGTTTGGTAGGTGATAACTACAGAACCCCTCTCGAGTTAAAACACGCAACCTGCCGAGAACAGCAAGACTACGTTTCGTCAACCGACCAAATCACGACAACTTCG…	NA	A7RGL0_NEMVE	A7RGL0_NEMVE	A7RGL0_NEMVE	0.4219
SEQINDEX3890_C_c	ATCCATGTTGGATTTCAATGTACGGGATGTCAAGTTACAATCCATGGCCATCTTGGCCTTGAGAAATTGTTTGCGGTATTGTCAGGGTTAAATCTTCTCGTAAGATATCTATGTATGGTGTTTCGATAGAATTTTGCCGTTAATGCGATGGCAAAAGATGGAGGAGAAGTGCAGTGGTGCTTTTCACAAGTGAAAGGGACCTTAGATGAGGATCTCACCGAAGCCGACATCGTCTCCACCGTTGAATTTAATCATGATGGTGAGCTACTTGCAACCGGAGACAAGGGAGGAAGAATTGTGATCTTTCAGAAAGAGGACGCGCCGAAAGGATCACAACATTATGGAGAATACAATGTTTACAGCACTTTTCAAAGTCACGAACCAGAGTTCGATTACCTA…	CCHX16610.b1_c_s	GGGGTGTGGAATGGAAATGATGGGTCTATAATGACTGGTTCCTACAACAATTTTTTTCACATCTTTGATCGAAGTAGTAAAACAGATGTTTGCCTTGAGGCATCGCGGGAGTTTACAAAACTGCGACAGATCCTTAAGCCACGCCGTGTCGCAGTAACAGGAAAGAGGAAGAAGGATGATATTACGGTAGAATGCTTGGACTTTAGTCATAAGATACTTCATACTGCCTGGCACCCGAGGGAGAACATTATAGCTGTTGCTGCAACAAATAACTTGTACCTATTCCAGGAGGCTCAAACATAACTCTTATTAGTGTTCATAGGAAATGTTTTTGCAATAATAATACCAACAATTTTGAATGTGGGCTTGACCTCAGTGAAGCCTATTATAGGTATTGTA…	Serine/threonine-protein phosphatase 2A 55 kDa regulatory subunit B alpha isoform OS=Rattus norvegicus GN=Ppp2r2a PE=2 SV=1; Accession=2ABA_RAT; E-value=0.0e+00	A7SQ97_NEMVE	A7SQ97_NEMVE	NA	0.4316
SEQINDEX4760_C_c	CTTTTGGGACAAAAATGAAGTGGATATTCAAAGAAGAGCATTCCTTAGAATCGAGATGTCATGAATCTGCGAAGATAAGGTCCAAGTATCCAGACAGAATCCCTGTTGTCGTAGAAAAGGCACCAAAGTCTTCGATTCAGGATATTGACAAAAGAAAATTTCTCGTTCCTTCGGATCTCACAGTCGCACAGTTCATGTATATCATCCGAAAGAGGATCCAGCTTCCACCTGAGAAAGCCATGTTTTTATTCGTGAACAAAGTTCTTCCAACTACGAGCTCAACAATGGGTGCTATTTATGAAGAACATAAAGATGAAGATGGCTTTTTGTACATTGCCTACAGTGGAGAAAACACCTTTGGAATGTGATGATGAATGTTCTTCAAGTGCGATTTATCTT…	Contig1838	GGGGATTTTGGAAAAAATAGGTTGCGCAGCAGAGAAGAGAAGTGAAAGGGCGAATCCTCGTTGCGTTTAATACTCTTTTGGGACAAAAATGAAGTGGATATTCAAAGAAGAGCATTCCTTAGAATCGAGATGTCATGAATCTGCGAAGATAAGGTCCAAGTATCCAGACAGAATCCCTGTTGTCGTAGAAAAGGCACCAAAGTCTTCGATTCAGGATATTGACAAAAGAAAATTTCTCGTTCCTTCGGATCTCACAGTCGCACAGTTCATGTATATCATCCGAAAGAGGATCCAGCTTCCACCTGAGAAAGCCATGTTTTTATTCGTGAACAAAGTTCTTCCAACTACGAGCTCAACAATGGGTGCTATTTATGAAGAACATAAAGATGAAGATGGCTT…	Gamma-aminobutyric acid receptor-associated protein-like 2 OS=Rattus norvegicus GN=Gabarapl2 PE=2 SV=1; Accession=GBRL2_RAT; E-value=6.0e-47	A7RRA1_NEMVE	A7RRA1_NEMVE	A7RRA1_NEMVE	0.449
SEQINDEX9844_C_c	TGAGAGCGTACCTCGACAGAACGACAAACGAACTCTCGACAGACCGTCAGAAATTTGTCGTGGAATATTCCACTGCTGTTGGCAAAGAGTTAATTTTGTTTGAGTTCGTAGAGTTGGATTGAACAATGTCCACGACCACAATTTTGACATCGTCGCCAAATGCGGGCTCGAACTCGAACGCCGAGAGCAATGGAAAATGTAGTCCAGACCGTGTCAAGCGACCCATGAATGCTTTTATGGTTTGGAGCAGAGAGCGGCGACGCCGTATGGCTCAAGAAAATCCGAAGATGCACAACTCTGAAATTTCGAAGCGTTTGGGTGCGGAATGGAAACAGTTATCCGACCCGGAAAAGCGGCCTTATGTTGACGAAGCGAAGAGATTGCGAGCGGTTCATATGA…	Contig839	GGGGGTAACGAGGTTTTGAGAGCGTACCTCGACAGAACAACAAACGAACTCTCGACAGACCGTCAGAAATTTGTGGTGGAATATTCCACTGCTGTTGGCAAAGGGTTAATTTTATTTGAGTTCGTAGAGTTGGATTGAACAATGTCCACGACCACAATTTTGACATCGTCGCCAAATGCGGGCTCGAACTCGAACGCCGAGAGCAATGGAAAATGTAGTCCAGACCGTGTCAAGCGACCCATGAATGCTTTTATGGTTTGGAGCAGAGAGCGGCGACGCCGTATGGCTCAAGAAAATCCGAAGATGCACAACTCTGAAATTTCGAAGCGTTTGGGTGCGGAATGGAAACAGTTATCCGACCCGGAAAAGCGGCCTTATGTTGACGAAGCGAAGAGATTG…	Transcription factor Sox-2 OS=Danio rerio GN=sox2 PE=2 SV=1; Accession=SOX2_DANRE; E-value=1.0e-45	Q3S381_NEMVE	Q3S381_NEMVE	Q3S381_NEMVE	0.4981
SEQINDEX9217_C_c	GTCAAACGTTCTTCGTTTTCCATCGTTGTTGAACGTTTTTCGGCTTCAAGCGAGCGATGCCTACCAAATTATTTGTGGGAAATGTCTCCGAGTCATGCACGGAGGACGACTTAAAGCAAGCTTTTGAAAAATACGGTCCCATTGTGGAGCATGCGATAAAAAGAAACTATGCATTTGTTCATTTCGAGAAGAAAGAAGACGCTGAAACTGCGATCAAAGAGCTCCACGAATCTGAGTTAAAAGGCAATGTCATTAGAGTATTACTCTCAACAACTCCGCACAAGACAGGAAGAGGTGGTGGAGGTGGTGGAAGAGCACCTCCATATAACAGGGATCGCGACAGAGCAGGATACCAACGCGGTCCGCCACGAAGAGGTTACGACCGCGGATACGGTCCAG…	Contig5707	GGGGGCGTGCACGGCCATCTTGTCAATCGAAGCCTTGTGTCAAACGTTCTTCGTTTTCCATCGTTGTTGAACGTTTTTCGGCTTCAAGCGAGCGATGCCTACCAAATTATTTGTGGGAAATGTCTCCGAGTCATGCACGGAGGACGACTTAAAGCAAGCTTTTGAAAAATACGGTCCCATTGTGGAGCATGCGATAAAAAGAAACTATGCATTTGTTCATTTCGAGAAGAAAGAAGACGCTGAAACTGCGATCAAAGAGCTCCACGAATCTGAGTTAAAAGGCAATGTCATTAGAGTATTACTCTCAACAACTCCGCACAAGACAGGAAGAGGTGGTGGAGGTGGTGGAAGAGCACCTCCATACAACAGGGATCGCGACAGAGCAGGATACCAACGCGG…	RNA-binding protein 4 OS=Oryctolagus cuniculus GN=RBM4 PE=2 SV=1; Accession=RBM4_RABIT; E-value=3.0e-13	Q2KIV3_BOVIN	Q2KIV3_BOVIN	NA	0.001
SEQINDEX10658_C_c	CTTCTTTGATCAATGGATCCTTCGGAGGTGGAGTTCATCGCTGAAAAGGAAAAAATATCGATCCTGACGAACTTTTCTGAGAACAAGATTTATTTGATCGGGGGTGATATTGGGCCATTTAGCGCATCAATACCGACTGACGTGCCGCTTTGGGTAGCAATATTTTTGAAACAGAGAAGGAAATGTAGAATTCAGCCTCCTCATTGGATGGATGTTGAAAAACTGCAGGAACTGAAAGAGAAGGAGAAGGAAGCAGAGTACTTTACAAAAATGCCATCAAAACACTACATGGAGATTTCATCTCTTCTGCTCAGCAGTGCAGCTGATGATATTCCACATGCTGATGAAGTGCGCACATTGATAAAGGATATCTGGGACTTGAGGATAGCTAAGCTACGC…	Contig768	TGGTAAGGAGCGTTACTGAGCGGGAAAACATGGCGGCAAAGGTTATGAAAGTTTGAATACGAGAAAAAGTCACCTACAGCTCTTCTTTGATCAATGGATCCTTCGGAGGTGGAGTTCATCGCTGAAAAGGAAAAAATATCGATCCTGACGAACTTTTCTGAGAACAAGATTTATTTGATCGGGGGTGATATTGGGCCATTTAGCGCATCAATACCGACTGACGTGCCGCTTTGGGTGGCAATATTTTTGAAACAGAGAAGGAAATGTAGAATTCAGCCTCCTCATTGGATGGATGTTGAAAAACTGCAGGAACTGAAAGAGAAGGAGAAGGAAGCAGAGTACTTTACAAAAATGCCATCAAAACACTACATGGAGATTTCATCTCTTCTGCTCAGCAGT…	DNA replication complex GINS protein PSF2 OS=Xenopus laevis GN=gins2 PE=2 SV=1; Accession=PSF2_XENLA; E-value=2.0e-51	A7SQT9_NEMVE	A7SQT9_NEMVE	NA	0.001
SEQINDEX3055_C_c	CAAAGGAGATAGCTAAGAGTTCAGCGTTCACAATTCCAACCACAACCATTTGTTATCCTCGAACAGAGGAAGAGGCCTCAGACGTGTTGCGACCTCCAGCCAAATTATCGCTTATTTCACCTGTACTGGCGGGGCAAACGCGCCGACGAAGGGCAGCTACTAGTGCCAAACAAAAGGAGCCAGCCGTAGTGGCAAGGAGGAACGCAAGGGAACGAAAACGCGTTAAATTGGTGAACGACGGTTTCATGCGGCTCAGAAAACACGTGCCAACGGACCCTAAAAACAAGAAATTGTCCAAAGTTAAAACGCTGCGTAGCGCAATCGAGTACATACGGCACCTGCAACATGTTCTGGCGATGGCCAATAAACATCAAATGGAAGCAGAACACGAGGCAGCTG…	Contig528	GGGGGACTTAGTCAGTGTTATATAGAGCGAGAGGACAGGGACGAAGATATGACTGCAAAGGAGATAGCTAAGAGTTCAGCGTTCACAATTCCAACCACAACCATTTGTTATCCTCGAACAGAGGAAGAGGCCTCAGACGTGTTGCGACCTCCAGCCAAATTATCGCTTATTTCACCTGTACTGGCGGGGCAAACGCGCCGACGAAGGGCAGCCACTAGTGCCAAACAAAAGGAGCCAGCCGTAGTGGCAAGGAGGAACGCAAGGGAACGAAAACGCGTTAAATTGGTGAACGACGGTTTCATGCGGCTCAGAAAACACGTGCCAACGGACCCTAAAAACAAGAAATTGTCCAAAGTTAAAACGCTGCGTAGCGCAATCGAGTACATACGGCACCTGCAA…	Achaete-scute homolog 2 OS=Rattus norvegicus GN=Ascl2 PE=2 SV=1; Accession=ASCL2_RAT; E-value=2.0e-18	A7SX24_NEMVE	A7SX24_NEMVE	NA	0.001
SEQINDEX15355_C_c	CAAAGTTTAAGAAGCTACTGGTTCCAGGCAAAATACAGCATATTTTGTGCACTGGTAATCTCTGTACGAAGGATTCCTATGATTATCTCAAAACCCTTGCCAGTGATGTTCATGTTGTCAGAGGAGATTTTGATGAGAATTTAGTGTATCCAGAACAGAAGGTGGTGAATGTTGGCCAGTTTAGGATAGGAGTTTGTCATGGTCATCAGATTGTTCCATGGGGAGATGCTGAAGCACTTGCTATGCTTCAACGTCAACTTGACGTTGACATTGTCATATTTGGTCACACACACAAGTTTGCAGCCTATGAGCATGAAGGAAAATTTTACATCAACCCTGGGTCTGCTACTGGAGCTTACAATCCATTACAAAGTGACATTGTACCCTCATTTGTGTTGA…	Contig1419	GGGGGATCTCCCCGGCAAGAGTAAGCCGCGGCGCCGCGCTTTCAGTGATCACAAGGTAATAGGGAAAATGCTTGTTCTAGTGCTTGGAGATCTTCATATTCCACACAGGCAGCACAGTTTGCCAGCAAAGTTTAAGAAGCTACTGGTTCCAGGCAAAATACAGCATATTTTGTGCACTGGTAATCTCTGTACGAAGGATTCCTATGATTATCTCAAAACCCTTGCCAGTGATGTTCATGTTGTCAGAGGAGATTTTGATGAGAATTTAGTGTATCCAGAACAGAAGGTAGTGAATGTTGGCCAGTTTAGGATAGGAGTTTGTCATGGTCATCAGATTGTTCCATGGGGAGATGCTGAAGCACTTGCTATGCTTCAACGTCAACTTGACGTTGACATTGT…	Vacuolar protein sorting-associated protein 29 OS=Pongo abelii GN=VPS29 PE=2 SV=1; Accession=VPS29_PONAB; E-value=4.0e-76	A7RV73_NEMVE	A7RV73_NEMVE	NA	0.001
SEQINDEX8216_C_c	TCTCTTCCTATTTCGAAGATGTGCGGCGAATGAATAAAAGACAGCTTTTTTATCAAGTATTAAACTTTGCAATGATAGTCTCCTCCGCCCTTATGATTTGGAAAGGTCTGATGGTTGTAACTGGAAGTGAAAGCCCTATCGTAGTTGTTTTAAGTGGAAGCATGGAACCAGCTTTTCAACGAGGCGATCTTTTGTTTCTGACCAATTACAAAGAAGATCCGATTCGTGTTGGTGAAATAGTTGTGTTTAAAGTTGAAGGACGGGAAATACCGATCGTACATCGAGTTTTGAAGATACACGAAAAAGAGAATGGAGATATAAAGTTCTTAACAAAAGGAGACAATAACTCTGTCGATGATCGTGGTCTCTATGCTCCTGGGCAGCTGTGGCTTCAAAGAA…	Contig1458	GGGGGTAGTACACGTGTCCGCCATCATGGATATCTCTTCCTATTTCGAAGATGTGCGGCGAATGAATAAAAGACAGCTTTTTTATCAAGTATTAAACTTTGCAATGATAGTCTCCTCCGCCCTTATGATTTGGAAAGGTCTGATGGTTGTAACTGGAAGTGAAAGCCCTATCGTAGTTGTTTTAAGTGGAAGCATGGAACCAGCTTTTCAACGAGGCGATCTTTTGTTTCTGACCAATTACAAAGAAGATCCGATTCGTGTTGGTGAAATAGTTGTGTTTAAAGTTGAAGGACGGGAAATACCGATCGTACATCGAGTTTTGAAGATACACGAAAAAGAGAATGGAGATATAAAGTTCTTAACAAAAGGAGACAATAACTCTGTCGATGATCGTGGTCT…	Signal peptidase complex catalytic subunit SEC11A OS=Pongo abelii GN=SEC11A PE=2 SV=1; Accession=SC11A_PONAB; E-value=8.0e-82	A7S5L9_NEMVE	A7S5L9_NEMVE	NA	0.001
SEQINDEX4446_C_c	ACTTGCCCAAGATGCAAAACAACCAAATACNGGAATCCCAAGTTGAAACTTCTGGTGAATGTGTGTGGCCACAAATTGTGTGAGACTTGTGTTGAGACGCTGTTCACCAGGCCCTCAGCTGCTTGCCCTGAGTGTAACACAGCCTTGAGACGCAATGACTTTAGGATCCAACAATTTGAAGATCTTATAGTCGAGAAGGAGGTCGACATCAGGAAAAGGATCTTGAAAATTTACAACAAGCTTGAAGATGATTTTCAGACAGCCTCTGATCCACTGAGAGCCTACAATGATTACCTAGAGGAAGTGGAGAGTATAATTTGGAACCTTGCAAATGGTCAAGATGTAGAGGAGACAAAGAAACAAATTGATAAATACAAGAAAGACAATGAATCCTGATAA…	CAOH923.b2_c_s	GGGGACTGGCAGACTTGCCCAAGATGCAAAACAACCAAATACAGGAATCCCAAGTTGAAACTTCTGGTGAATGTGTGTGGCCACAAATTGTGTGAGACTTGTGTTGAGACGCTGTTCACCAGGCCCTCAGCTGCTTGCCCTGAGTGTAACACAGCCTTGAGACGCAATGACTTTAGGATCCAACAATTTGAAGATCTTATAGTCGAGAAGGAGGTCGACATCAGGAAAAGGATCTTGAAAATTTACAACAAGCTTGAAGATGATTTTCAGACAGCCTCTGATCCACTGAGAGCCTACAATGATTACCTAGAGGAAGTGGAGAGTATAATTTGGAACCTTGCAAATGGTCAAGATGTAGAGGAGACAAAGAAACAAATTGATAAATACAAGAAAGACAAT…	CDK-activating kinase assembly factor MAT1 OS=Marthasterias glacialis PE=1 SV=1; Accession=MAT1_MARGL; E-value=6.0e-47	A7RWZ3_NEMVE	A7RWZ3_NEMVE	NA	0.001
SEQINDEX7082_C_c	GAAGCACGCTACCGTCAAAATGGCAGACACGCGGGGTCGAGCGCCTTCCCCTTCGAGAGCAAACAGAAACCGTTCGCGGGAAAAAGATCGGGTCAAAGAACCAGAAAAAACTGAAGAGAAGCCATCAATCGACAGAGAAAAGACATGTCCATTACTTCTTAGAGTGTTTTGTAATCAAGGACGACATCACAGATTAGATGAATACTCCAGAACTGCTCTGCCATCAAATGAGCTTCAAGTATACACATGGAAAGACGCTACTCTGAAAGAGCTGATGAGTCTAGTGAAAGAAGTTAATCCAGATACAAGACGCAGGGGCACAATGTTTGATTTTGCCATTGTATTTCCTGATGCTCGGCGTGGTGGATTTATCATGAAAGAGATTGGCTCAACTGTAGC…	Contig2824	GGGGGTCACTAAGCACGCTACCGTCAAAATGGCAGACACGCGGGGTCGAGCGCCTTCCCCTTCGAGAGCAAACAGAAACCGTTCGCGAGAAAAAGATCGGGTCAAAGAACCAGAAAAAACTGAAGAGAAGCCATCAATCGACAGAGAAAAGACATGTCCATTACTTCTTAGAGTGTTTTGTAATCAAGGACGACATCACAGATTAGATGAATACTCCAGAACTGCTCTGCCATCAAATGAGCTTCAAGTATACACATGGAAAGACGCTACTCTGAAAGAGCTGATGAGTCTAGTGAAAGAAGTTAATCCAGATACAAGACGCAGGGGCACAATGTTTGATTTTGCCATTGTATTTCCTGATGCTCGGCGTGGTGGATTTATCATGAAAGAGATTGGCTC…	Histone deacetylase complex subunit SAP18 OS=Pongo abelii GN=SAP18 PE=2 SV=1; Accession=SAP18_PONAB; E-value=1.0e-44	A7RY60_NEMVE	A7RY60_NEMVE	NA	0.001
SEQINDEX407_C_c	CAATTGGCTCACGAACAGTTGTTCATCCCAAGGCTCGTATAATTGCTGAAGCAGGACCAATAATTATTGGAGACAACAACCTCATAGAGGAACAAGCCACCATATTAAACTCTTGCTTCCTCGACGATGACGATCAAGTGGGCGAAAAGATTGTGATGAAAATTGGGAATCATAATGTGTTTGAGGTGGGTAGTCAGTGCGAGGCAGTAAGTGTTGGAGACAACAATATACTCGAAGCAAAAAGCAAGATTGGTCGCCATACATGCGTTTCCCATGGCTGTGTTATTGGAGCCAAGTGTGAGGTGACCTCCCAACAAACACTGCCCGAGAATACGGTAATCTACGGACAGAGTTGTTCAAGGAGAGTTCAGGGCGAGAGGCCAGTCCCTCAAACACTAC…	Contig2107	GGGGGAGCTGCCAGCAGAAGCAAGATGTCGAAGGCTCCCCAAACCCCTCGTAAACTAAAAATTGGGAGTGGTTCAGTCGTTTGCCAGGAGGCGGAAATAAAAGGTGAAGTGACAATTGGCTCACGAACAGTTGTTCATCCCAAGGCTCGTATAATTGCTGAAGCAGGACCAATAATTATTGGAGACAACAACCTCATAGAGGAACAAGCCACCATATTAAACTCTTGCTTCCTCGACGATGACGATCAAGTGGGCGAAAAGATTGTGATGAAAATTGGGAATCATAATGTGTTTGAAGTGGGTAGTCAGTGCGAGGCAGTAAGTGTTGGAGACAACAATATACTCGAAGCAAAAAGCAAGATTGGTCGCCATACATGCGTTTCCCATGGCTGTGTTATT…	Dynactin subunit 6 OS=Nematostella vectensis GN=dctn6 PE=3 SV=1; Accession=DCTN6_NEMVE; E-value=7.0e-61	Q4T0Y4_TETNG	Q4T0Y4_TETNG	NA	0.001
SEQINDEX12021_C_c	CGGAAAGGATCAATCGGGCGCCGGCCGAAGTTGTCTTTGAAAGATCAAAAATGGAGAATGGCATGATGAACGGCGACCATCGCGATCGATCGCCTTCCCCTTCGTCCGGGTTGACTCGCTCAAACTCGCGAAACGGGAATTGCAAAGAAATCAACCGTACCTCCCTGTTAAGAAGAAACCAAAGCCTCAGCGCCAAGCAAATTCGCTTTTACAGGAATGGCGACCGATTTTTTAGCGGGCTTAAACTGGCCGTATCTCCTGAGCGGTATAAAGAGTTTGATGCTCTGCTGGCAGAGTTATCAAACAAGCTCGAACTTTCAACCGGCGCCGTACGCTACGTTTTCAACGCTGAAACGGGGAAGATGATTACAGATGTGAACGAACTTCAGTACGGTTCCT…	Contig4985	GGGCGCTGAAACGGGGAAGATGATTACAGATGTGAACGAACTTCAGTACGGTTCCTGTTATGTGTGTTCTTCCTGTAACGTCTTCAAAGAGGTAGAAAATGGGTACGGCAATGTTAAGCCATGTTGGTCGCTCTCACACCCCAAGAAAGAATCGGCTCCTACATCCTCAGGATCGCATCAAATTGATGGTAGTCGAGATTTCATCAAACCAAAACTGGTCACGGTTATAAAGAATGGAAAACCCCCACAAAAGAAAGTTACTATGCTACTTAATGCAAAGACAGCAGTCAGCTTGGAACAAGTTTTGAACCATCTGTCTTCGAAGGGAACGTTAGGAAAAGTAGACAAACTTCACACAGTCGATGGAAAGCAGATCAAAGAGCTTAGACATCTGTTTGG…	Serine/threonine-protein kinase DCLK2 OS=Homo sapiens GN=DCLK2 PE=2 SV=3; Accession=DCLK2_HUMAN; E-value=3.0e-36	A7RVP9_NEMVE	A7RVP9_NEMVE	NA	0.001
SEQINDEX19990_C_c	CGTGAAGGCAGGGTTGATGCGAATCAAGGAGAAGTTATTGAAAAAGGTGATCTTGTGCGAAATGTGCAAAGGAAACGCAAGCGTATCGTCGCCTAACATGAGTTGGGATTCTCTTCAGAATACGAAAGGTCCCAACAGCATGAAGATTGTTCTTTTTGCGGATTTTGCATCCAGCAGTCACGGTTTAAACCAGGCACAGTACATGCTAAAACTAACTTTAGTAATGAAGGACATCAAATTTCTCTTTTTGAATGTGCCAATGTTAGTGTGCCTCTGCTGATGTATGAAGATACTCAAACATGCCTTTGTCAAGTATTTGAAGAGCCTATGAAAGTTTTGGAACGTAAAGTGCAAGAAGCTGATGCTTTTCTCCTTGTAACGGACAAGACAGGATTTCAG…	Contig2578	GGGGACGTGCTACTTTGAGCTCGAGCGTGAAGGCAGGGTTGATGCGAATCAAGGAGAAGTTATTGAAAAAGGTGCTCTTGTGCGAAATGTGTAAAGGAAACGCAAGCGTATCGTCCCCTAACATGAGTTGGGATTCTCTTCAGAATACGAAAGGTCCCAACAGCATGAAGATTGTTCTTTTTGCGGATTTTGCATCCAGCAGTCACGGTTTAAACCAGGCACAGTATATGCTAAAACAACTTTGTAATGAAGGACATCAAATTTCTCTTTTTGAATGTGCCAATGTTAGTGTGCCTCTGCTGATGTATGAAGATACTCAAACATGCCTTTGTCAAGTATTTGAAGAGCCTATGAAAGTTTTGGAACGTAAAGTGCAAGAAGCTGATGCTTTTCTCCTTG…	NA	A7S6V1_NEMVE	A7S6V1_NEMVE	NA	0.001
SEQINDEX1963_C_c	AAACATGGCGGAGGGTATCCATCATTATTTTGAGGACCTCATAACAAGGCACGAGGGCATTCTCGCTATAATGGTTACAGACCGTGACGGAGTTCCTCTCGTGAAAGTTGCAGATCACTCCAAAGTGCCACAAAATGCTCTGAGGGCCAGTTTTCTCTCAACATTCTCCACAACAGCTGAACAAGCAAGTAAGCTGGGGTTATTAAAAAACAAGAGTATTGTGTGCTTTTTTGCTTCATATCAGGTAGTTCATTTCAGTTTTCTTCCCCTTGTTGTCAGCATAATTGCTACAAGTCAGGCAAACACAGGTCTTCTATTAGGTCTTGAAAAAGAATTTGAGGAAACAGTGAAGAGGATAAAAAATATAGTTGATGGGGTTTAATGAGATTGTCACTGTTT…	Contig3460	GGGGGAATGAGCATTGTTCAAACATGGCGGAGGGTATCCATCATTATTTTGAGGACCTCATAACAAGGCACGAGGGCATTCTCGCTATAATGGTTACAGACCGTGACGGAGTTCCTCTCGTAAAAGTTGCAGATCACTCCAAAGTGCCACAAAATGCTCTGAGGGCCAGTTTTCTCTCAACATTCTCCACAACAGCTGAACAAGCAAGTAAGCTGGGGTTATTAAAAAACAAGAGTATTGTGTGCTTTTTTGCTTCATATCAGGTAGTTCATTTCAGTTTTCTTCCCCTTGTTGTCAGCATAATTGCTACAAGTCAGGCAAACACAGGTCTTCTATTAGGTCTTGAAAAAGAATTTGAGGAAACAGTGAAGAGGATAAAAAATATAGTTGATGGGGTTT…	Mitogen-activated protein kinase kinase 1-interacting protein 1 OS=Rattus norvegicus GN=Map2k1ip1 PE=2 SV=1; Accession=MK1I1_RAT; E-value=6.0e-23	A7RQ93_NEMVE	A7RQ93_NEMVE	NA	0.001
SEQINDEX8063_C_c	ATGGATTCACCTAGTCCAGAGCTGGACCAAAGCTTACAAGGCCTCATCAGTTTTGAGAGATTGGATCGAGCTTCGCCAGATTTATGGCCAGAGCAAATTCCAGGAGTTTCAGATTTTGCTTCTCTGGCTGTCAGCCCATTCACATTGACAAGCCCTACTCCAAAATGGTTGGCTGATTTAGAGAAAGACGACATGGATATGCTGCAAGAATTTGGAAGTCTTACTACATCTCAACTCATGGAGAAAGTTAGAGGTCTGCAGAATCTTGCATTTCAACTTGGGTTAGATGAAGCACGAGAAATGACCAGGGGAAAGTTTTTAAACATTTTGGAAAAGGTCAATTCAGGAAGACGATAGAACAACAGTATGGCTGAACTTAACCCTTTGTACTGTACAGAA…	Contig1689	GGGGAGGTTGGGCGCAGAAGTTAAATTTTTCAACTTTGTCCTCTTGTTTATTACACGTTTTAAAACTTAATTGTGACATTTTGCACCGCATTGAGATTACGTAAGGAAAATGGATTCACCTAGTCCAGAGCTGGACCAAAGCTTACAAGGCCTCATCAGTTTTGAGAGATTGGATCGAGCTTCGCCAGATTTATGGCCAGAGCAAATTCCAGGAGTTTCAGATTTTGCTTCTCTGGCTGTCAGCCCATTTACATTGACAAGCCCTACTCCAAAATGGTTGGCTGATTTAGAGAAAGACGACATGGATATGCTGCAAGAATTTGGAAGTCTTACTACATCTCAACTCATGGAGAAAGTTAGAGGTCTGCAGAATCTTGCATTTCAACTTGGGTTAGATGA…	Protein lin-52 homolog OS=Pongo abelii GN=LIN52 PE=3 SV=1; Accession=LIN52_PONAB; E-value=3.0e-38	A7RGP2_NEMVE	A7RGP2_NEMVE	NA	0.001
SEQINDEX9593_C_c	TATCCAGAAATCGACGATGTTGTTATGGTCAACGTACGAAGCATTGCAGAGATGGGAGCGTACGTTAATCTGTTGGAATACAACAACATCGAAGGGATGATTTTGCTCAGTGAACTATCGAGAAGGCGAATTCGTTCAATTAATAAACTGATCAGAGTTGGAAGAAACGAGTGTGTGGTCGTGATTCGTGTGGATAAAGACAAAGGTTACATTGACTTGTCTAAAAGGAGGGTTTCACCTGAAGAAATTAAGAAATGTGAGGAGAAGTTTACAAAAGCAAAGGCAGTTTACAGTATCTTAAGACACTGTGCAGAAATCTTGGAGTATGAGACAGATAAACAGCTGGAGGAACTGTATGAAAAGACAGCTTGGCATTTTGATGAAAAGTTTAAGTCACCA…	Contig3699	GGGGGCACATGTGTAAGTGAATGAGGCCTTTTGATCTTGAAGCTCATTTTCCTTTTCCACGATGCCTTTAACCTGCAGATTTTACAAACACAAGTATCCAGAAATCGACGATGTTGTTATGGTCAACGTACGAAGCATTGCAGAGATGGGAGCGTACGTTAATCTATTGGAATACAACAACATCGAAGGGATGATTTTGCTCAGTGAACTATCGAGAAGGCGAATTCGTTCAATTAATAAACTGATCAGAGTTGGAAGAAACGAGTGTGTGGTCGTGATTCGTGTGGATAAAGACAAAGGTTACATTGACTTGTCTAAAAGGAGGGTTTCACCTGAAGAAATTAAGAAATGTGAGGAGAAGTTTACAAAAGCAAAGGCAGTTTACAGTATCTTAAGACA…	Eukaryotic translation initiation factor 2 subunit 1 OS=Xenopus tropicalis GN=eif2s1 PE=2 SV=1; Accession=IF2A_XENTR; E-value=1.0e-107	A7S534_NEMVE	A7SC47_NEMVE	NA	0.001
SEQINDEX21769_C_c	CCTTATCAAGGCAGTATACAGCGGAGACAGACAATCTTTTGAAGGAGAAAGGACTCAAATGTGTTTGCGAACTGTGCGATTGTGGTGGATACCATCGCCACCAGGGCTGCATGAAAAATTCCCACAAAGTGAAAGCTGTGTTTCAGCGGCCGGGTATGTCTGACGTCAAGACGGATTACCAACAAACCTACACACTCCACGAGGATACCATGCCACGCAACCCAAGGAAACCCCTGCCCCGCTTGAGGAACCCTAATCCACCGCCTATGGACTTCCGGACGGTACAAAGAATGGATTTCATTGAACGAAAACCTGAACCACTGCAATTTCACAAGGCCACCGAAGAATACAAAACACCCGAAGAGAAGATCGACGGGAAGACAGTATATGCCCAAGATT…	CCHX13366.b1_c_s	GGGGGATAAATAGTCACAACACAACGATTCATGTTAAAAATGGGTTCTCCCAGCGTGAGAGGATTTCGTTCAGTAGTATCGATGAAGGCCCTTTCGTAGTATTTTGGTTTGCAAAAGGCAAGCAAAGATAAAATGGCCTTATCAAGGCAGTATACAGCGGAGACAGACAATCTTTTGAAGGAGAAAGGACTCAAATGTGTTTGCGAACTGTGCGATTGTGGTGGATACCATCGCCACCAGGGCTGCATGAAAAATTCCCACAAAGTGAAAGCTGTGTTTCAGCGGCCGGGTATGTCTGACGTCAAGACGGATTACCAACAAACCTACACACTCCACGAGGATACCATGCCACGCAACCCAAGGAAACCCCTACCCCGCTTGAGGAATCCTAATCCACCG…	NA	A7RHM3_NEMVE	A7RHM3_NEMVE	NA	0.001
SEQINDEX3228_C_c	GACAACTGCAGGTCATGAGGATCGCATCCTTGGCGGTACTGGTCGCCATAGGCCTAGTCCATTTCAAGTTATCGGAGTCGTTGCCAATGTCTTCAGTTCCCCCATTGCTTAACAAACTACTCAAGGATCAGAATGTAACGCTCGGCTTCATTCTCAAAGGCCTTCAAGGTCCACCCGGTATGAACGGTATGGCAGGAATGTCGGGTTCTCCCGGTCCACAAGGACCTCCGGGATTCAAGGGAGATCCCGGTTCGCCTGGATTCCCCGGAAGCCCTGGTCTTCCTGGTGCTCCGGGTTTCCAGGGTCCTCCTGGTATGGATGGTGCTCCTGGTTCACCTGGTTTTCCCGGACCTGCCGGTTTCCCCGGTGGTAGCGGAATGCCTGGTACACCCGGTATGC…	Contig3990	GGGGCTCCGGGTTTCCAGGGTCCTCCTGGTATGGATGGTGCTCCTGGTTCACCTGGTTTTCCCGGACCTGCCGGTTTCCCCGGTGGTAGCGGAATGCCTGGTACACCCGGTATGCAAGGTCCTCCTGGTCCACAAGGTCCCCCTGGTCCAACACCAATCAGATACAATGGCACAGTTAAATGCGAAGAAGACACAGCCTGGCTTCGGTGCAACGAATACAAACACATTAGCATTATCTCCGCCTTCTGGGGAAGGCGAAATTTTGGTCTCTGCACAGAACACACAGGAAATCTCCAGTATAATCAATACTGCCCGACAACTCCAATGTTTCTTACAAAAGTAAAGGACGCCTGCGAGGGAACAACCATGTGTGAAATCAGATGCACCAAGCTCTTTTTC…	Uncharacterized 9.5 kDa protein in DHFR 3'region OS=Saimiriine herpesvirus 2 (strain 488) PE=4 SV=1; Accession=YDH3_SHV2C; E-value=4.0e-09	B7T139_ACRMI	B7T139_ACRMI	NA	0.001
SEQINDEX20504_C_c	GTAAGTAGCACTGGAACAACCTCAGATAGAGATCAGTCCGCAACTGGGGCACAACGAACCACATTCAGCGAGCCGGTTTATGCGAACTCCGAAGCAAGCGGATCACATGTTAAGTACACTGAGAGGCTCCACAAGCACATCCGACCGAAACTAGGACCAAATGAAATTTATCAAACCCAAATAACAGCAAATAAAAACTACAGCTACTGGATGAAAGATGGTGTTCAGAATGAATCATGGACACAGAATGAACAACATCCAAGAGTTAATAGTGAAATGACCAGGTTTGTTGATGAGATGACACTAACAAACAGAGAATTCACACTATTTTAACAATTTCCTTTCAAGAAAGACAAGGACAAAAACCTCCAATTCATCCCTTTTAATTTTGCATCTTTT…	Contig2102	GGGGGTTTTGAAAGTTTTTGCTATTTATTGCGGTTCTTTCTTACTTGATGAAGTTTTGTCATGGCTTTCTTCAACTTGACACGCTTAGGATTTCAAGACCCTATCAAAGCTGCTGTAAGTAGCACTGGAACAACCTCAGATAGAGATCAGTCCGCAACTGGGGCACAACGAACCACATTCAGCGAGCCAGTTTATGCGAACTCCGAAGCAAGCGGATCACATGTTAAGTACACTGAGAGGCTCCACAAGCACATCCGACCGAAACTAGGACCAAATGAAATTTATCAAACCCAAATAACAGCAAATAAAAACTACAGCTACTGGATGAAAGATGGTGTTCAGAATGAATCATGGACACAGAATGAACAACATCCAAGAGTTAATAGTGAAATGACCAGG…	NA	A7S008_NEMVE	A7S008_NEMVE	NA	0.001
SEQINDEX8050_C_c	CGTAGCAGCCTCAAACATACCTCAGAAAGTTCACGCTGTTGTTGATTTATACGGAAGATGCGTTGAAGTATCAATTTATGAGCCCTACGATGGTAGCACTGGTATGAGTTCACCAGAAGCACAGTCATGTCCTTCCACTGCCTCAGTGCACTTTCATCCCCACTGTGGCTCTCTCATAAAGCTTTCAAACAATAACAGAACCGCAGAACGAGAAAGACCCACAGAAGAATTTAAGTNNNNNNNNNNNNATGATCAACAGGTCACTAAATGGGCAGGGTCAGTAGAGATTGGCATCACTACCCATGACCCAGAGACCCTAGAGTTCCCGTCAACAATGACTAATCTGCAACTTCCAGGAACTTGGATGATGTCTGGGGGAAGCCTGGTGTGTGATGGAGT…	Contig4006	GGGGAGAGACTGAACGAGAGTGCACGTAGTATATCTTAAAATTAAAAAAAAAAAGAGATTTAATGCTTTCTGCAGTGCATTCATAACAGGAACAAGATATTAATGCCTGTTGCTCACGAGAAATGGGCTATAGGCTTGCATGACCGTCATGGACGCTATATAACTTTGTCAAATAACAATCGGAGAGCCACTCGTGAAGGTGACACCTACGACCATGGTATGGTGTTCAGTGATAGAGCTCTTCACATTGGCGAGGTTTTCCAGCTGAAAATCGAGGAACTAGAATCCAAATGGGCAGGATCACTGAGATTTGGAATCACAACAAGAAATCCCAACTGTCCACACACAAGGATTGTACGTGCGGCAACAGATTTGTTTACTCCAGATGGCAAGGATTAC…	NHR domain-containing protein KIAA1787 homolog OS=Xenopus tropicalis PE=2 SV=1; Accession=K1787_XENTR; E-value=2.0e-50	A7RUP8_NEMVE	A7RUP8_NEMVE	NA	0.001
SEQINDEX13320_C_c	CGGCAAAATGAGAAGATGTAGAATCCTTCGTCAAGTTCCAACTGGCAAGTTAACAGTACAGCAGCTATATCTTCAACATCTTCTAGCAACAGTACAAACACTGTTCCATCCCTTCTTAAAGAACTCCATGGCCTTGTGTTGCAAATTCAGGAGCAAAGAACACAAAGTGAGCAAAACTTAAGTTCAATTGCCAAGACACATGAAAAGATGAAAGCTGAAGTTAGAGTATCTCCCTACTTTAAAACCAAGTTGAGGGGTTTGTATAAAACTGCAGGCTCTGATGCAGAAACTGAGGCCGAACTGATTAGAAAGGCACTGGATAAGATAGCCATTATCAAAGCACTTAGAAATGACAGAAGAATGGTTCGGAGTGGAAATAGCAGAATGGGACATCAGGAG…	Contig3530	GGGGGAGCCTGTGTACGTGATCCTCGATTAAGATGTCGGCAAAATGAGAAGATGTAGAAATCCTTCGTCAAGTTCCAACTGGCAAGTTAACAGTACAGCAGCTATATCTTCAACATCTTCTAGCAACAGTACAAACACTGTTCCATCCCTTCTTAAAGAACTCCATGGCCTTGTGTTGCAAATTCAGGAGCAAAGAACACAAAGTGAGCAAAACTTAAGTTCAATTGCCAAGACACATGAAAAGATGAAAGCTGAAGTTAGAGTATCTCCCTACTTTAAAACCAAGTTGAGGGGTTTGTATAAAACTGCAGGCTCTGATGCAGAAACTGAGGCCGAACTGATTAGAAAGGCACTGGATAAGATAGCCATTATCAAAGCACTTAGAAATGACAGAAGAAT…	SAGA-associated factor 29 homolog OS=Homo sapiens GN=CCDC101 PE=2 SV=1; Accession=SGF29_HUMAN; E-value=1.0e-95	B0BM70_XENTR	B0BM70_XENTR	NA	0.001
SEQINDEX1505_C_c	AAGGTGAGGTGTTTGAAGTAATGAACAGTATTGGTCCAGAGTGCAATGACTTGAAGAAAGAGTACGATGCTTGTTTCAACGTTTGGTACTCAGAGAGCTTCCTTAAAGGACAATACAAAGCCGACCCATGTAGTGAGCTTCTGAAGAGCTATAGATCATGTGTTCTGAAAGCCATTAAGGAAAGGAACATAGATCTTTCAGATATTGAAGCCAATATTATTGGAACTGAAAAGGAGAAGCAACCACCCCCAGAAAAATAGCTCATCAAGACACATGACATGTGTCTGTTAACTCAGTCAAGAAACAGTGGAATTGCAGAAATGCAGTCTAATTCAGAGCAAAAAAATCCATCACAACTTGTCAATGAAATAGAGACCTTTGGACTTTCATAGGAATGAA…	Contig116	GGGGAAGAAAGCATCGAACATCTTGAAGTTGTATTTGGGCTTGAATCAAAGGTGAGGTGTTTGAAGTAATGAACAGTATTGGTCCAGAGTGCAATGACTTGAAGAAAGAGTACGATGCTTGTTTCAACGTTTGGTACTCAGAGAGCTTCCTTAAAGGACAGTACAAAGCCGACCCATGTAGTGAGCTTCTGAAGAGCTATAGATCATGTGTTCTGAAAGCCATTAAGGAAAGGAACATAGATCTTTCAGATATTGAAGCCAATATTATTGGAACTGAAAAGGAGAAGCAACCACCCCCAGAAAAATAGCTCCTCAAGACACATGACATATGTCTGTTAACTCAGTCAAGAAACAGTGGAATTGCAGAAATGCAGTCTAATTCACAGCAAAAAAATCCAT…	TP53-regulated inhibitor of apoptosis 1 OS=Homo sapiens GN=TRIAP1 PE=1 SV=1; Accession=TRIA1_HUMAN; E-value=4.0e-16	A7SVU1_NEMVE	A7SVU1_NEMVE	NA	0.001
SEQINDEX3425_C_c	GCACGAGATAGATTACAAGGGGCAAGGTTTGGTTGAAGTTTGCGCAGATTTGATCCACAATAACAGCCGAAAGTTTTGCAAACCTCTCCTTTTGTGTCATTTTAGTCTTCAGCTCATTGTTTAGAAGAAAGTTGTGCCGTTTATCAAATGAGTTGCCGAGTGTATTTAGGAAGATTGCCATACGGCACGAGGGAACGCGACATCGATAAATTTTTCCGTGGCTACGGAAAATTGCGCGAAATCAACCTAAAGAATGGATATGGATTTGTGGAATTTGAAGATCCAAGAGATGCTGATGATGCTGTGTATGAATGCAATGGCAAGGAAATGATGGGAGAAAGAATTCTAGTTGAGCATTCTCGAGGAACAGCAAGAGGTTTCAGTGGTGGTCGCAAATCC…	Contig6510	GGGTGGGCCTCCAGTTAGAACGCCTTGGAGAGTGACTGTTGAAAACCTGTCAACCCGTATAAGCTGGCAGGATCTGAAAGACTATGCACGTCAAGCAGGAGAAGTGACATATGGAGATGCACACAAACAGCGACAAGGTGAAGGTACACTAGAGTTTGCAAGCAAGCGGGACATGAAGAATGCTATCAGAAAGCTTGATGGAACTGAATTAAATGGCAAGCGCATCAAGATGGTTGATGAGAGCCCGCGGTCACGTTCTCGGTCCCGCTCACCTTCCCGCTCTAGAAGCCGTTCCCGATCCAGATCTCGTTCCAGGTCTCGCTCTGGTTCACGGTCAAGACGCCGTCGCTCCAAATCTCGCTCGCGTTCGAGATCGAGGTCTCGCTCGCCCTCGCCCCG…	Serine-arginine protein 55 OS=Drosophila melanogaster GN=B52 PE=1 SV=4; Accession=SRR55_DROME; E-value=2.0e-61	A7RM69_NEMVE	A7RM69_NEMVE	A7RM69_NEMVE	0.001
SEQINDEX11053_C_c	CCCCCGCCAGAACAAGATGGAAAGTCGATTGTCCCACAGACAAAGAAGGCAAGAACATTGGAAGATTTTAACGCGTTCTGTAGACTAATTCTCGCTTACGAAGCCAGAGAAGAGGATGTTCGGCAGAGAGACAGAAGTCCAAATTCCTTGGAAAGCGTTTCTTCAAGCACAGACTCTGCTTACAGCGAAGCGGCGTCGTCGCCAACAAGTTCTAGTGGCGACGAACGATTACTGGACGACGTAGATGAGGAGTACAGTTCAGACGATGAATCGTGGAACAAGATCACATGTTACTGCCAAAAACCTTTCGCTGGGAGACCCATGATTGAGTGTTCCGAATGCCTCACGTGGATACATCTATCATGTGCGAAGATTAGAAAATCGAACGTTCCTGATGTT…	Contig3152	GGGGAATGATGTGTAGTTCGACAAGATTTTGCGTTTGGCATTGGAAGGGGGAATAATAATCCGTCTTTCTTAGTTGCACACTCAGCTGTTTTTGAGAATTTTTTCAAGCTTTTATGGTTCAATCAAGGGTAATGACCTCAGGAACTGTCAAAGTCTCGAGGAAGCTTCCTCCGCCAGAACAAGATGGAAAGTCGATTGTCCCACAGACAAAGAAGGCAAGAACATTGGAAGATTTTAACGCGTTCTGTAGACTAATTCTCGCTTACGAAGCCAGAGAAGAGGATGTTCGGCAGAGAGACAGAAGTCCAAATTCCTTGGAAAGCGTTTCTTCAAGCACAGACTCTGCTTACAGCGAAGCGGCGTCGTCGCCAACAAGTTCTAGTGGCGACGAACGATTAC…	PHD finger protein 13 OS=Homo sapiens GN=PHF13 PE=2 SV=1; Accession=PHF13_HUMAN; E-value=5.0e-26	A7SWD0_NEMVE	A7SWD0_NEMVE	A7SWD0_NEMVE	0.001
SEQINDEX15503_C_c	TGTAAATATGGGTCGTGTTATCAGAGGTCAGCGAAAGGGTGCTGGGGGTATTTTCAAGGCCCATACCAAGAAGAGAAAAGGAGCACCAAAACTGCGCAAACTGGACTACTCAGAACGTAATGGCTACCTAAAGGGTGTTGTCAGGCAGATCATTCACGACCCTGGTCGTGGGGCACCCTTAGCTGTGGTCACCTTCCGGGATCCATACAAGTACAGGCAAAGGAAGGAGTTATTTATCGCCACTGAAGGAATGTATACTGGGCAGTATATTTTCTGTGGAAAGGGAGCAAGCCTTCAAATTGGCAACTGCTTGCCTATTGGTGTCATGCCAGAAGGAACCATAATCTGCAACATGGAGGAGAAAGCAGGTGACAAAGGCAAACTTGCTCGTACATCAGG…	Contig1519	GGGGTCTCTTTGCCCTCCGTGGCCATATTGTAAATATGGGTCGTGTTATCAGAGGTCAGCGAAAGGGTGCTGGGGGTATTTTCAAGGCCCATACCAAGAAGAGAAAAGGAGCACCAAAACTGCGCAAACTGGACTACTCAGAACGTAATGGCTACCTAAAGGGTGTTGTCAGGCAGATCATTCACGACCCTGGTCGTGGGGCACCCTTAGCTGTGGTCACCTTCCGGGATCCATACAAGTACAGGCAAAGGAAGGAGTTATTTATCGCCACTGAAGGAATGTATACTGGGCAGTATATTTTCTGTGGAAAGGGAGCAAGCCTACAAATTGGCAACTGCTTGCCTATTGGTGTCATGCCAGAAGGAACCATAATCTGCAACATGGAGGAGAAAGCAGGTG…	60S ribosomal protein L8 OS=Anopheles gambiae GN=RpL8 PE=2 SV=2; Accession=RL8_ANOGA; E-value=1.0e-114	Q1HR32_AEDAE	Q1HR32_AEDAE	Q56FH5_LYSTE	0.001
SEQINDEX4421_C_c	GCACGAGGCCATGAGCCGCGCAAGCGCATTTGAAGTCTTGACGTGGCTGAGTTCTTGTCGGCTTGTTCCACGCGAGAAATAGAAGTGTTTTGCCGTGATATTTGGCTTGGTTTCGTTCAGAATACCACACCATGGGTCTTACGATATCAAGCCTTTTCTCGAGATTTTTTGGAAAGAAACAGATGAGAATTTTGATGGTTGGTCTTGATGCAGCCGGCAAAACCACTATTTTGTACAAACTGAAATTGGGAGAAGTGGTCACAACCATTCCTACAATTGGTTTTAATGTCGAGACAGTGGAATATAAGAATATATCCTTTACTGTTTGGGATGTTGGTGGCCAGGACAAAATCAGGCCTCTGTGGAGACATTACTTTACAAACACTCAAGGACTTATAT…	Contig1322	GGGGGACGTGGCTGAGTTCTTGTCGGCTTGTTCCACGCGAGAAATAGAAGTGTTTTGCTGTGATATTTGGCTTGGTTTCGTTCAGAATACCACACCATGGGTCTTACGATATCAAGCCTTTTCTCGAGATTTTTTGGAAAGAAACAGATGAGAATTTTGATGGTTGGTCTTGATGCAGCCGGCAAAACCACTATTTTGTACAAACTGAAATTGGGAGAAGTGGTCACAACCATTCCTACAATTGGTTTTAATGTTGAGACAGTGGAATATAAGAATATATCCTTTACTGTTTGGGATGTTGGTGGCCAGGACAAAATCAGGCCTCTGTGGAGACATTACTTTACAAACACTCAAGGACTTATATTCGTTGTAGATAGTAACGACAGAGAGAGAATAAAT…	ADP-ribosylation factor 4 OS=Xenopus laevis GN=arf4 PE=2 SV=2; Accession=ARF4_XENLA; E-value=4.0e-84	Q56P20_PIG	Q56P20_PIG	NA	0.001
SEQINDEX6859_C_c	GGAAGGTCATGCTGCTTTGTTTGCTACTCTTATTTCACGAACTGCAAAAGACATAGATTTCTTAATTGAGTCACTGCCAAGTGAAGAATGCTCTTCAGCTCTCCAGGTAGCAAGCTTACACAAGCTGGAAAGTGAAAGTTATGCAGCTGGCAGAAGACTGGAGGAAGCCGTCATGAGAGGGGAGAAGTTATTGGAGTCAATTCAGCAGGCTCTGAGTGAAATAGCAGAATCGAGGCTCTCGAACAAGTAAAGCTGGAGTAACCGGACCGTCAAAGCACTTTCAATACCCGTGAAAATAGACGCTACTAAGTCAAGTCAACACGTTTGCGGACACCAGTTGGAGAAAGATCGGTGTTATCGGTATCGCAAATAAGTCTGTGAATTGAGTTGACGAAGCTG…	Contig2150	GGGGAGTGAAATAAAAAAAGATGGCGGATAGAATCACTCAGTTGCAGGACGCACTAAATCAGCTTGCAGATCAATTTTGTAACAGTGTTGGTATACTGCAACAAACAGCACAACCTGGTATTTCTGGCTTTGACAAAACATCAACAGGAGGAGGTAGTGGTGTTACCCAGGAAGGTCATGCTGCTTTGTTTGCTACTCTTATTTCACGAACTGCAAAAGACATAGATTTCTTAATTGAGTCACTGCCAAGTGAAGAATGCTCTTCAGCTCTCCAGGTAGCAAGCTTACACAAGCTGGAAAGTGAAAGTTATGCAGCTGGCAGAAGACTGGAGGAAGCCGTCATGAGAGGGGAGAAGTTACTGGAGTCAATTCAGCAGGCTCTGAGTGAAATAGCAGAAT…	Mediator of RNA polymerase II transcription subunit 21 OS=Bos taurus GN=MED21 PE=2 SV=1; Accession=MED21_BOVIN; E-value=8.0e-19	A7RLY3_NEMVE	A7RLY3_NEMVE	A7RLY3_NEMVE	0.001
SEQINDEX5392_C_c	AGCATGGATTTCCATGTTGACGAAGGGAGTGGATTTTGAATACATAGAACAAGATCCTTACAACAAGTCTGCTGATTGGCTTGCGATAAATCCCCGTGGATTGATCCCAGTCGTTGTTCACAATGGCAGATCTATCTATGAGAGTCATGTGTGTATCGAGTACATCGATGAAGCTTGGCCAAGTGAACCCAGATTACTCCCAAGAGATCCTTATGACAGAGCAAGGGCACGTATATGGGGAGATTTTGTTGCAAAGAAACTTGTTCCTCCGCACTACCAGTTCCTCTTGAAGCAGTCTCAAGAAGAACAAGACGATGCAAGAAATCAGCTACTGACCAACATTCTCGAGTTCACACAAGCCATGGACCCTGAGGGACCATTCTTTCTCGGAAAGAATTT…	Contig3201	GGGGGAATAAAACTCTCGCAGTGAAAAGGAAATATGGCTTTAAGCAAACCCAAACTGTACTGTGCCTGGTTCTGTCCATTTGCACACAGAGCATGGATTTCCATGTTGACGAAGGGAGTGGATTTTGAATACATAGAACAAGATCCTTACAACAAGTCTGCTGATTGGCTTGCGATAAATCCCCGTGGATTGATCCCAGTCGTTGTTCACAATGGCAGATCTATCTATGAGAGTCATGTTTGTATCGAGTACATCGATGAAGCTTGGCCAAGTGAACCCAGATTACTCCCAAGAGATCCTTATGACAGAGCAAGGGCACGTATATGGGGAGATTTTGTTGCAAAGAAACTTGTTCCTCCGCACTACCAGTTCCTCTTGAAGCAGTCTCAAGAAGAACAA…	Lactoylglutathione lyase OS=Glycine max PE=2 SV=1; Accession=LGUL_SOYBN; E-value=1.0e-20	A7RJG9_NEMVE	A7RJG9_NEMVE	NA	0.001
SEQINDEX11430_C_c	CAAAATGGCGATGTCAGACGTGGACGTGANGTAGTTCTTTAGACCACGACGAGGAGCCTTTGGCTGAACTTTCAGACGAAGACTNGTATACTCTTGTTCAAGAGAATATCCAGGCCAATGAAGTCCTCAAAAATGAAACTACCATGTTTGAAAAGTTTTTGAAAAGGGTTGACCCAAAGGACATTGGTCTCCAACAGGCTGCTACACAAGGCCCAAGTCAACCAGTGATTGAGATTGGTCTTCGGGGATCAAGAAAGAAATCAAGATCCAGGGGACCGTCATTAGACAGGCATTTAAAATTAACAGCGGAGCAAAAATGTGATATTGCTCAGCGGGAACTGGAAGAGTTACGAGATGAAATTGAGAAGCTCAAGGATGAATCAGAAAAGATCCTGGATA…	Contig6458	GGGGATAACTTTAGAGCTGTCATGGAAGAAGCTGACATAAGAAGTGCTGAAGTAAAAAAGTCATCATATGAATTTGAAAGAGATATTGTCAAAGGTGCTGTTAATCAGAGAACCAATAAAGTTATTGCTGAAAGAGTTACCAAATACCTGGAAGACAAACTAAGAGCTAGGGACACAACAATAGAAAAACTTCGACTCAAGAACTCCACTCTTAAGGTTCAAAAGAGAAAGCTTCACATGCAATTAAAACAGAAAGAAGAAATGGGTGAAGTACTTCATGAAGTTGACTTTAATCAGTTGAAAATTGAAAACCAGCAGTATCTTGAAAAGATTGATGAAAAGAATCAAGATCTTCTAAGACTCAAACTCATGTCCACAAACGTACAACAGATTCTCAAC…	Coiled-coil domain-containing protein 113 OS=Mus musculus GN=Ccdc113 PE=2 SV=1; Accession=CC113_MOUSE; E-value=2.0e-70	A7SJZ5_NEMVE	A7SJZ5_NEMVE	A7SJZ5_NEMVE	0.001
SEQINDEX9397_C_c	GTAAGATTTACGAGGCATTTATTTTAAGCAAACTTCACCAGAACTTTGATCCTTTTGAGGAACAAAAGAAGACATCTTTCATAGAACTTCAGAATTCTGCCATTTCTTTGGCTCAGTTCCTTTGCCAAACTCTAGATGCTACTCTTGTTGACCATAAAGGAAATGTGAAACTTTGTTTGACATTTTCCTCCAGTTTTGCTTGTGGGGGAACCGTTGCGATCTCTCAATCTCTAGTGGAGAAATCCAGGCAGGCCAGGGAGCTGGCCAGACAGANCATCTTCAACGTATGAAAGACAAAATTATTGTTGACAACTTAGAAGATGTTTGGAGTGTAGTTCACAAGATTGGAAACGAGAGGGTTGACTTTGTCCTCGACAACTCTGGGTTTGAACTTTTCAC…	Contig3782	GGGGTAAGAAGGATCTTCTTTCGATGTTGGAAGAAATGAAATCATCTTCTAATGAATGTCTGTCGCAGCTTGGGGAACGCTGGCTAAAGCGCATCCAGGAAGGATCATTTGTCATTCAAAGTCACAAGTTCTGGACCTTGGCTCAAGACTACAGTGAAATGAAAAGCATTGCATCTGATTTGTATCAAGATCTCTCTCAAGCCAAAGTCGTGTTTTTCAAAGGTGACCTGAATTATCGAAAATTGGTTGGTGACCGCAAGTGGCCTCACACTACTCCTTTTACAGAAGCTCTTTGGGGATTTTTGCCAGCACCTTTATGTTCATTGAGAACTCTCAAAGCTGATGTCCAAGTTGGTTTACTTCCAGGTCAAGATAACAAGATCCAGGCTGAAAGCAAAG…	UPF0364 protein C6orf211 homolog OS=Rattus norvegicus PE=2 SV=1; Accession=CF211_RAT; E-value=2.0e-64	A7RWT7_NEMVE	A7RWT7_NEMVE	NA	0.001
SEQINDEX15963_C_c	ACCTTCAAGAACGGAGCGTATTTGCTCTCGACAACCTAGAAATTCCTAGGAGCTTGAATATCTCTAGACACTGTCAGTATTTGTCAGAAATCGATACTTCCTGTTTCATCATGTCGAAACCAACGGAACATGTCAAGAGGCCCATGAATGCGTTCATGGTTTGGTCCCGAGAGGAAAGGCGAAAAATTGCTCAAGATAATCCCAAGATGCACAATTCGGAGATCAGTAAACAGCTAGGAGCCGAGTGGAAGAAGTTGACAGACGTAGAAAAAAAGCCGTTTGTTGAGGAAGCTAAACATCTTCGAGCGCAACACATGAAACAACATCCAGACTACAAATACCGACCGCGACGAAAGCCGAAATCTTTGTTAAAGAAAGTTGACCGTTATCCGTTCACGC…	Contig1467	GGGGACCGCACTTGGCAATCAAGATTTAATTCAGTTTCAACGAGGCACCTTCAAGAACGGAGCGTATTTGCTCTCGACAACCTAGAAATTCCAAGGAGCTTGAATATCTCTAGACACTGTCAGTATTTGTCAGAAATCGATACTTCCTGTTTCATCATGTCGAAACCAACGGAACATGTCAAGAGGCCCATGAATGCGTTCATGGTTTGGTCCCGAGAGGAAAGGCGAAAAATTGCTCAAGATAATCCCAAGATGCACAATTCGGAGATCAGTAAACAGCTAGGAGCCGAGTGGAAGAAGTTGACAGACGTAGAAAAAAAGCCGTTTGTTGAGGAAGCTAAACATCTTCGAGCGCAACACATGAAACAACATCCAGACTACAAATACCGACCGCGACGA…	Transcription factor SOX-14 OS=Gallus gallus GN=SOX14 PE=2 SV=1; Accession=SOX14_CHICK; E-value=1.0e-41	A7SUF3_NEMVE	A7SUF3_NEMVE	Q1W380_ACRMI	0.001
SEQINDEX4209_C_c	GAAGACTCGAAAGCTGCGAGGCCATGTCAGCCATGGTCATGGTCGTATTGGAAAACACAGGAAACATCCTGGAGGTCGTGGTAATGCTGGTGGACAGCATCATCACAGGATCAATTTTGATAAATTCCATCCAGGTTACTTTGGAAAAGTAGGCATGAGGCACTTTCACAAAACTAACAACAAGTACTACAGACCAATTATCAACCTAGAGAAGCTGTGGTCCCTTGTGAGTGAGCAGACAAGACTGTACTACAAGGACAAGCCAGATGGACCAGTACCTGTTATCGATGTTGTCAGAGCTGGGTACTACAAAGTTCTTGGAAAAGGCAGTTTGCCTCAGCAGCCACTTATTGTGAAAGCCAAGTTTTTTAGTCAGAAAGCTGAACAAAAGATCAAGAA…	Contig1543	GGGGACATTTTCTCTTTGCTTCCTTCCAAAATGACTGCACGACTGAAGAAGACTCGAAAGCTGCGAGGCCATGTCAGCCATGGTCATGGTCGTATTGGAAAACACAGGAAACATCCTGGAGGTCGTGGTAATGCTGGTGGACAGCATCATCACAGGATCAATTTTGATAAATTCCATCCAGGTTACTTTGGAAAAGTAGGCATGAGGCACTTTCACAAAACTAACAACAAGTACTACAGACCAATTATCAACCTAGAGAAGCTGTGGTCCCTCGTGAGTGAGCAGACAAGACTGTACTACAAGGACAAGCCAGATGGACCAGTACCTGTTATTGATGTTGTCAGAGCTGGGTACTACAAAGTTCTTGGAAAAGGCAGTTTGCCTCAGCAGCCACTTATT…	60S ribosomal protein L27a OS=Xenopus laevis GN=rpl27a PE=2 SV=2; Accession=RL27A_XENLA; E-value=3.0e-50	Q4S172_TETNG	Q4S172_TETNG	NA	0.001
SEQINDEX15548_C_c	AAAGCCATTGAAACTGCAGAGCAACAGGGCTACGAAGTTCTTAGTAAGTATGTTGCACTCTACGCTGCGAATTTGATCAAAGACAACAACACTCTCAGGCGCTGGACTTGTTTTGTAGATACGGTGCCCCGGCAAATCCTCAGAACTTCAATATTTACAAGCGAATTATACAGACGTCATATCGATGGCGGGACTCAGTTCTGCAGAAAGTTACCACACTTGGGCGGATCTCAGAGACGTTTTGTTTGAAATAGTCGATGGACTGGGTAAAGGATCTGCAGCAAGTTCACCGCTGCGCAAGAGTTCGAGGTCATGTTGGAGATAGTTCATTATTACAGCACCAGATGTGCATGTATGCAACACAAATCACTGGATACCTTGGCGGCCAAACTATCTATT…	Contig2432	GGGGATGTGCATGTATGCAACACAAATCACTGGATACCTTGGCGGCCAAGCTATCTATTTCTCTTCTTCGCCACTCGGACATTGTCCCTTGCGACAAGGCTTTTTACGAGGCTGGTGTCGCTGCTAAGGGTGTTGGCTGGGATAACATGGCTTTCGTATTTTTAAATCGCTACTTGGATCTAAGTGAGGGCATCGAAGAAGGAAACCTAGACATGTTGGACAATAGTGATTTCACAGATACTGATATTCCATTTGAAGTTCCTGTCCCGGATAAACAGCATCTACCAGAGGAGAAACGCGAAGAAGTGAAAGAGTGGGTGTTGGCTGTATCTATGGATCAAAAGGTGGAGCAAGTGTTGCCAACTGACGAGCGTGACACGTACGAGGCTTGTCTTGTGG…	Intraflagellar transport protein 172 homolog OS=Homo sapiens GN=IFT172 PE=1 SV=2; Accession=IF172_HUMAN; E-value=7.0e-87	A7SES7_NEMVE	A7SES7_NEMVE	A7SES7_NEMVE	0.001
SEQINDEX14534_C_c	GACGAGGAAAATGGCGATGTGGTAAAGAATTAAAAGTGGTAGCTACTGTACTTTGTGAACAAGGATTCTATAGAACGCCATGTCAAATGAAGACAGGGCAATTGAGCTTGTAGCTCAGGCAGAGAAGAAAGTTAAGTCATCTCAAGGTTTTTTGGGCGGTTTATTTGGCGGGGCCTCGAAGCTAGAAGATGCGGCAGAATTGTACATCCAAGCAGGAAATGCGTTCAAAATGGCACAAAAATGGAGTGCCGCAGGTAAAGCGTTCATGGAAGCAGCCAAACTGCACATTAACCTTCAGTCCACGCATGAAGCGGGACAACGTTATCTTGATGCAGGGAATTGCTTTAAGAAGACAGATACTGAAGAAGCCGTGAGGGCTTTTGAAATGGCCATAAACAT…	CCHX12917.b1_c_s	GGGGGAAGACGAGGAAAATGGCGATGTGGTAAAGATTAAAAGTGGTAGCTACTGTACTTTGTGAACAAGGATTCTATAGAACGCCATGTCAAATGAAGACAGGGCAATTGAGCTTGTAGCTCAGGCAGAAAAGAAAGTTAAGTCATCTCAAGGCTTTTTGGGCGGTTTATTTGGCGGGGCCTCGAAGCTGGAAGATGCGGCAGAATTGTACATCCAAGCAGGAAATGCGTTCAAAATGGCACAAAAATGGAGTGCCGCAGGTAAAGCGTTCATGGAAGCAGCCAAACTGCACATTAACCTTCAGTCCACGCATGAAGCGGGACAACGTTATCTTGATGCAGGGAATTGCTTTAAGAAGACAGATACTGAAGAAGCCGTGAGGGCTTTTGAAATGGCCAT…	Beta-soluble NSF attachment protein OS=Mus musculus GN=Napb PE=1 SV=2; Accession=SNAB_MOUSE; E-value=1.0e-100	A7SV93_NEMVE	A7SV93_NEMVE	NA	0.001
SEQINDEX421_C_c	AAAAGAAGGAAGAGAAACAAACATCGTGTTATTTTTAGTTTTCTGTCCCAAAGAAAAGCCTGTCTTTCCCGCAAATGAGCCAAGCAGAAAAAACAGAAGAAGGAAACAAAGAGGAGTGGATGGCGAAGTTAACAGACATGCGTTTTCAGCGGGCAGACATGAATCGTTTGATTATGGACTACCTTGTCACTGAAGGCTTCAAGGAAGCTGCTGAAAAATTCAAAATTGAATCAGGCACGCAACCATCGGCTTCTCTCGATAGCTTGGACGAAAGGATAAAAATAAGGGCAGCAGTCCAAAGAGGGGATATAGAGGAAGCAATTGCGCTCACAAACAAGCTAAACCCAGAAATATTGGATTGCAAACCTCATCTCTACTTCCATTTGCAACAACAACGTC…	Contig1539	GGGGGTATTGCCGGGACTTACTATTTTTGAAAAGAAGGAAGAGGAACAAACATCGTGTTATTTTTAGTTTTCTGTCCCAAAGAAAAGCCTGTCTTTCCCGCAAATGAGCCAAGCAGAAAAAACAGAAGAAGGAAACAAAGAGGAGTGGATGGCGAAGTTAACAGACATGCGTTTTCAGCGGGCAGACATGAATCGTTTGATTATGGACTACCTTGTCACTGAAGGCTTCAAGGAAGCTGCTGAAAAATTCAAAATTGAATCAGGCACGCAACCATCGGCTTCTCTCGATAGCTTGGACGAAAGGATAAAAATAAGGGCAGCAGTCCAAAGAGGGGATATAGAGGAAGCAATTGCGCTCACAAATAAGCTAAACCCAGAAATATTGGATTGCAAACCTCA…	UPF0559 protein v1g247787 OS=Nematostella vectensis GN=v1g247787 PE=3 SV=1; Accession=U559_NEMVE; E-value=5.0e-82	Q6AZQ0_XENLA	Q6AZQ0_XENLA	NA	0.001
SEQINDEX10461_C_c	CGGCCCAGAAATTTCAGAGAGAATTGAAAAAGGCGGTTTGGACCTAAAGATTTTCGAGTTAAGCTGTTTGAATTTTCTTCAGATTTCAAACACAAAATTATTTTCTCTCCCAGAGGATTTGGGAAATTTGTTGCACCTAAAAACTTTGGACTTGCACAGAAATTCTTTACAGGAACTACCTTCTTCAATAGGTCTGTTGAAAGAATTGAAAAACCTCGACTTGTCTGGAAACGAATTGGAGGTTCTGCCTTCAGCTTTAGGACAACTGAGTTCACTTCACACTTTGAATTTGAACTGTAACAAGCTCACAGAGATACCCGACTTAAAGGAGGTTACAGAATTATCAAGGCTAGACTTAAGTCACAACCAGCTCACAGAGCTGCCTGAGAGTTTGTTTGA…	CCHX7564.b1_c_s	GGGGCTTGGTGAGTGAAGTTTTGAGTGCACGTTGTTAACATGGGCTGGCCAGAAGTTGACCAAGCAGCTGACGAGCATCGATATGAGCTAGTTCTCAACGGCCCAGAAATTTCAGAGAGAATTGAAAAAGGCGGTTTGGACCTAAAGATTTTCGAGTTAAGCTGTTTGAATTTTCTTCAGATTTCGAACACAAAATTATTTTCTCTCCCAGAGGATTTGGGAAATTTGTTGCACCTAAAAACTTTGGACTTGCACAGAAATTCTTTACAGGAACTACCTTCTTCAATAGGTCTATTGAAAGAATTGAAAAACCTCGACTTGTCTGGAAACGAATTGGAGGTTCTGCCTTCAGCTTTAGGACAACTGAGTTCACTCCACACTTTGAATTTGAACTGTAAC…	Leucine-rich repeat-containing protein 40 OS=Danio rerio GN=lrrc40 PE=2 SV=1; Accession=LRC40_DANRE; E-value=7.0e-20	A7RY02_NEMVE	A7RY02_NEMVE	A7RY02_NEMVE	0.001
SEQINDEX8339_C_c	GCAAAAGGGAACCTACTGCTGGAAAATATACTTAATTTTGACGAAGCCTTCGNAGCGACTTGTGCAATAGAAACGGTAAACAATGGGTCGAATTTTTCTTGCCCATCCTGGTGGTACAAGACTGTTCTCTTGCGGTAACTGTGACACTGCCTTGACGAACAGATCGGAGCTAACTTCCACGAAATTTACTGGTGCTACAGGGAGAGCATTCCTGTTTAAACGAGTAGTGAATTTGGCATACAGTGAAGTTCAAGATAGAGTTATGCTCACTGGTAGACACATGGTTAGAGATGTTTATTGCAAGAATTGTGAAATCAAGTTGGGCTGGATGTATGAATATGCCACAGAGGAAAGCCAGCAGTACAAGGAAGGTCAAGTTATTCTGGAGCGGGCATTGGT…	Contig1375	GGGGGACGATAAAACCAAAATAAAGAAGTCCGCGGCAAAAGGGAACCTTTGCTAGAAAATATACTTAATTTTGACGAAGCCTTCGAACGACTTGTGCAATAGAAACGGTAAACAATGGGTCGAATTTTTCTTGCCCATCCTGGTGGTACAAGACTGTTCTCTTGCGGTAACTGTGACACTGCCTTGACGAACAGATCGGAGCTAACTTCCACGAAATTTACTGGTGCTACAGGGAGAGCATTCCTGTTTAAAAGAGTAGTGAATTTGGCATACAGTGAAGTTCAAGATAGAGTTATGCTCACTGGTAGACACATGGTTAGAGATGTTTATTGCAAGAATTGTGAAATCAAGTTGGGCTGGATGTATGAATATGCCACAGAGGAAAGCCAGCAGTACAAG…	Protein yippee-like 5 OS=Pongo abelii GN=YPEL5 PE=2 SV=1; Accession=YPEL5_PONAB; E-value=4.0e-49	A7RW79_NEMVE	A7RW79_NEMVE	A7RW79_NEMVE	0.001
SEQINDEX15694_C_c	GTACAACTCAACTCGAATGCCTAATANACTAGGTCACGATACTCAGAGCGAAGCAGAAAATCAAATACTTCAATTTGAAGCGTTGGTAAAATACCAATGTGCAAGTCAATTGAAGTTTTTCTTGTGTTCGGCATATTTTCCGCTGTGCACAGAATTGGTAGAGGAAATGGTCACGTCTTGTCGCCCGTTGTGCGAATTTGTGCGGAAGAAATGTCTCCCCGTNCTTGAAGAATTCGGCGTTTCATGGCCTGGTAATCTCAATTGTAGCAAGTTCCGGAGAGAAAACAACTTGGAAACGATGTGTATGGAGGGGCCAAACATTACGGATGACTCAAGTTCAAAGCCAACTTCAGTGTTTGGCGGCATCGGATCGCAAATGGTAGCGAAATAACGCCAAGG…	CCHX16940.b1_c_s	GGGGAATTTCATGCGATCGAGAAACCGATGGTCCTAAATTTCTTATACAAGATGGTCTTAGAAACACCGGATGTGCTGTTGTGTTTTTAGTGCAGTATTTCTTCGGTATGGCTGCGACAATTTGGTGGGTCATTTTAGCCTTGAGTTGGTTCCTTGCTGCTGGAATGAAATGGAGCTATGAGGCCATTAGCTCATATTCGAACTTATTTCATGTCATTGCGTGGACCTTGCCAGGCATAAAGACAATTTTTATCCTTATTACGCGTAAAATCGACGGTGATGAATTGACTGGGCTCTGTTTTGTTGGAAATCAAGACTTGATCGCACTTGCAGCGTTTGTGTTGGGCCCTGATTTTACGTACTTAATTATCGGCACTCTTTTTTTGATCGCTGGATTTG…	Frizzled-4 OS=Homo sapiens GN=FZD4 PE=1 SV=2; Accession=FZD4_HUMAN; E-value=1.0e-139	A7SZJ6_NEMVE	A7SZJ6_NEMVE	A7SZJ6_NEMVE	0.001
SEQINDEX16103_C_c	CCCGGACAGCTCTTCCTGCACAGGATATTTGGCTACAGAGGTAATACTCTTCACTTGGACAGCAAGACTGTACGATCGAGATAAAGAAACACGAGAAAATGAAAAGTCCCTTGAAGAGAATGGATCTTTTAATCCTGGAAAGGAGATGAAAGCTGAAACACAGACTTATTATCAGGCACTGATTGATAACAGAGATTCACCATTTATTAGGGCTCAACCGGAGATTGTCACATTTCTGGGATATGAAAGCGAGAATGCTCTTTACTCAATACCTGGTCTGGATTACATTTCTCAGGAAGACGTTCTTCCCTACATGATTTCAGATATTTCTTCTCATCCAATCCATCATGAACTTTTTGACAAGTTCTTGTATCCTGAAGCTAAAAGAGTACCACCCTT…	Contig970	GGGGACGGTACATGGCATGTTTCCATACACCACGTGCATACCAAGAGTGAGTAAAGATGGCGAAGATGCGAAATGTGATAGGGGCTTTTCTCCAAATCAAGCGGCGTTATGCACGATTGGCGGAGATCGGACGTTTTCAAGAGCCCATAACCAGCGGGAAATATGAACCCGGACAGCTCTTCCTGCACAGGATATTTGGCTACAGAGGGGTAATACTCTTCACTTGGACAGCAAGACTGTACGATCGAGATAAAGAAACACGAGAAAATGAAAAGTCCCTTGAAGAGAATGGATCTTTTAATCCTGGAAAGGAGATGAAAGCTGAAACACAGACTTATTATCAGGCACTGATTGATAACAGAGATTCGCCATTTATTAGGGCTCAACCGGAGATTGTCA…	Polymerase delta-interacting protein 2 OS=Homo sapiens GN=POLDIP2 PE=1 SV=1; Accession=PDIP2_HUMAN; E-value=3.0e-97	A7SY84_NEMVE	A7SY84_NEMVE	NA	0.001
SEQINDEX3396_C_c	AAGTTTCGGATCGGAATTAGACTAAAAATTGTGCTTTTTTGTTGAGATCTTTCGCAAGAAAATAGGTTTCTTAGGGCATGGCGTTAAAAAGGATCAATAAAGAATTGCAAGATCTTGGACGCGATCCGCCAGCGCAATGTTCGGCAGGACCGGTTGGCGATGATTTATTTCATTGGCAAGCGACTATCATGGGGCCGCCCGATAGCCCCTATCAAGGTGGAGTATTTTTCCTCACAATACATTTCCCAACAGATTATCCGTTCAAGCCACCAAAGGTGTCTTTTACTACCAAAATATACCACCCAAACATTAACAGTAATGGAAGTATTTGTCTTGATATCCTGAGATCTCAGTGGAGTCCAGCTCTTACTATCTCTAAAGTTCTTTTGTCAATATGTT…	Contig1513	GGGGGTACTCCATTAACAGGAAGTTTGGGATCGGAATTAGACTAAAAATTGTGCTTTTTTGTTGAGATCTTTCGCAAGAAAATAGATTTCTTAGGGTATGGCGTTAAAAAGGATCAATAAAGAATTGCAAGATCTTGGACGCGATCCGCCAGCGCAATGTTCGGCAGGACCGGTTGGCGATGATTTATTTCATTGGCAAGCGACTATCATGGGGCCGCCCGATAGCCCCTATCAAGGTGGAGTATTCTTCCTCACAATACATTTCCCAACAGATTATCCGTTCAAGCCACCAAAGGTGTCTTTTACTACCAAAATATACCACCCAAACATTAACAGTAATGGAAGTATTTGTCTTGATATCCTGAGATCTCAGTGGAGTCCAGCTCTTACTATCTCTAA…	Ubiquitin-conjugating enzyme E2-17 kDa OS=Drosophila melanogaster GN=eff PE=1 SV=1; Accession=UBCD1_DROME; E-value=6.0e-81	Q6PPH5_HOMCO	Q6PPH5_HOMCO	Q6PPH5_HOMCO	0.001
SEQINDEX6253_C_c	CACAAACCAAGTTGGTTCTGCGTCCACGCAGAGCGAAACTCGCGTAGTTCAAAATCACCCGACCACCATGGCTTACGTGCGAGACGAACACACCGTTGTGAAGTACGAGAATCTTACTCCAGCGAGTGTAGCTTCGTTAAACGACCAACGAGTTGGAAATAATCATCTTGCGACGCATCAATGGGTCGTGCAAGACCATACAGGGGCGGTTGGCTGGCCCGCAAACACAGTGAGTTTACAAGAAGTCAAACCAATGTTGGGAGAAAATGCTTCACCGGTAATAACAACAATCGCCGGTGCAACTCTTGTTCATCACCGGCCCGGTGGTCACCCAGTTATGCCTTTAGACCAAGCACGTTGGCCTACTTCTGCTACACATGGGGCACACTCTCCCGATCA…	Contig2329	GGGGGAAACCAAGCTTGTTACAATGGAAGCGCAAAGCAACCCCTACACAAACCAAGTTGGTTCTGCGTCCACGCAGAGCGAAACTCGCGTAGTTCAAAATCACCCGACCACCATGGCTTACGTGCGAGACGAACACACCGTTGTGAAGTACGAGAATCTTACTCCAGCGAGTGTAGCTTCGTTAAACGACCAACGAGTTGGAAATAATCATCTTGCGACGCATCAATGGGTCGTGCAAGACCATACAGGGGCGGTTGGCTGGCCCGCAAACACAGTGAGTTTACAAGAAGTCAAACCAATGTTGGGAGAAAATGCTTCACCTGTAATAACAACAATCGCCGGTGCAACTCTTGTTCATCACCGGCCCGGTGGTCACCCAGTTATGCCTTTAGACCAAGC…	Silk gland factor 3 OS=Bombyx mori GN=SGF3 PE=2 SV=1; Accession=SGF3_BOMMO; E-value=3.0e-68	Q1W381_ACRMI	Q1W381_ACRMI	NA	0.001
SEQINDEX4347_C_c	TATTCGGTCCGTCAGCTGGCAGAGTCGCTTAGTTAGTAATCCCATTTTGGTTGATATCGCCGAGTGTGCCTTGTGAAGTTCCTTGGGAATGAGCGAGCAGGAGCTTCAGCGTATGTAGATCGCTACGTGATTCCTCGCTCGTCAAAATAAACTTATAACCTTAGCGTCGCGTCTCTCTTGGGTGCTCGCGAGCATTTCCTGTCACGCTTTAAACCAAGGAGCTCTTAAGGTTTGTTTTGTATTTCTCTTGCAGAAAAGCGTCGAATATCCATGTGTGTCGGCTGCGGCTCCCAGATCCAAGACCAGTACATTCTTCGCGTTGCTCCAGACCTTGAATGGCACGCGGGCTGCCTCAAATGTGCCGATTGCCACACATATCTGGACGAGACTTGTACGTGT…	Contig4994	GGGGGGGGAATGAGCGAGCAGGAGCTTCAGCGTATGTAGATCGCTACGTGATTCCTCGCTCGTCAAAATAAACTTATAACCTTAGCGTCGCGTCTCTCTTGGGTGCTCGCGAGCATTTCCTGTCACGCTTTAAACCAAGGAGCTCTTAAGGTTTGTTTTGTATTTCTCTTGCAGAAAAGCGTCGAATATCCATGTGTGTCGGCTGCGGCTCCCAGATCCAAGACCAGTACATTCTTCGCGTTGCTCCAGACCTTGAATGGCACGCGGGCTGCCTCAAATGTGCCGATTGCCACACATATCTGGACGAGACTTGTACGTGTTTTGTGCGAGACGGAAAGACCTATTGCAAGCGTGATTACGTTAGGTTATTTGGAACAAAATGCGCCAAGTGCTCTAGAT…	Insulin gene enhancer protein ISL-1 OS=Gallus gallus GN=ISL1 PE=2 SV=1; Accession=ISL1_CHICK; E-value=1.0e-54	A7RR95_NEMVE	A7RR95_NEMVE	NA	0.001
SEQINDEX9912_C_c	CCTTACGGATATGGCGGCAACCTTGCATACGATTATGGTGCTCAGGACCGACCACGATGAGCTCAACTATTGGTGGAGGCTACGGAATGCAAGGATCGATGAAACCACGGCAAACTAGCGAAGACTATACGAGTTTTGAAGACGAACCTCCGTTGTTAGAAGAGCTTGGTATCAATTTTGAGCACATTTGGCAAAAGACATTGTCAGTATTAAATCCATTACAACTCACTGAAGCCAACATCATGGATGACACAGACCTAGCAGGTCCATTAGTGTTCTGTTTGGCATTTGGTGGATTTCTGCTACTGTCTGGAAAAGTTCATGGTTTTGGTTACATCTATGGTGTGGGTTTATTAGGCTGTGTTTCCATGTATGCCATTCTAAATCTTATGAGCATGA…	CCHX1938.b1_c_s	GGGGAGGTTGACAAGCTTCCAAGACAACAACACTTTCTTGTTGGCAAAAATGTCGAATTTCGGAAGCGATAGCAGCATTTCAATTGATCAGGATTTTTTTGAAAGTGGGTACAATTACCCTGAACAGAAGGAGCAGCCATATGGTGGATATAACTATGATCCAAAATACCCAGATTATGGACAATCTGCTCAGCAAATTCCGACTTATAATTACCCGTCTGCAACAAGCTCCCACGGATTTTACGATTCGTCAACTCCTTACGGATATGGCGGCAACCTTGCATACGATTATGGTGCTTCAGGACCGACCACGATGAGCTCAACTATTGGTGGAGGCTACGGAATGCAAGGATCGATGAAACCACGGCAAACTAGCGAAGACTATACGAGTTTTGAAGA…	Protein YIPF5 OS=Danio rerio GN=yipf5 PE=2 SV=1; Accession=YIPF5_DANRE; E-value=7.0e-52	A7S3E2_NEMVE	A7S3E2_NEMVE	A7S3E2_NEMVE	0.001
SEQINDEX2711_C_c	CAACGAAGCTGGCCTTCTTACTAAAAGGCTCTTACCTTCGACCTTAACGCGCTCTTGGGACAAGGCGAATTTCCTTTAACCAAATGTTATCGTTAATTTGCAGTCGACCCAAAGAAACTACGGAGACAATGGCCCTTCAATGCAAGGCCTTTGTTGGGGAGATCCAAATCCTCTCGGACGACGAAAGCGCCCTCGTTCAAATCGCCAAGCCTCTCGGAAGCGGAGGTTTCGGTACTGTATACGAAGGGAAATTTCGGGGACGAAAAGTTGCCGTGAAAAAAATGAACACGAATTCAAAAAATCCTCGAGCGGTTCTGCAAAGCTTTCAAGCAGAAACTTCAATAGCCTCGTTTTGTCATCCTCACATTGTCCGGACTCTTGCTGCCTCGAGCTCGGACC…	Contig4363	GGGGGCATTACCACGGAAGTTGCAGGCGACTTGATCTGGAGGCCTCTTTGGAGTCACGAAGCTGGACTTCTTAAAACGACTCAACAACGAAGCTGGCCTTCTTACTAAAAGGCTCTTACCTTCGACCTTAACGCGCTCTTGGGACAAGGCGAATTTCCTTTAACCAAATGTTATCGTTAATTTGCAGTCGACCCAAAGAAACTACGGAGACAATGGCCCTTCAATGCAAGGCCTTTGTTGGGGAGATCCAAATCCTCTCGGACGACGAAAGCGCCCTCGTTCAAATCGCCAAGCCTCTCGGAAGCGGAGGTTTCGGTACTGTATACGAAGGGAAATTTCGGGGACGAAAAGTTGCCGTAAAAAAAATGAACACGAATTCGAAAAATCCTCGAGCGGTTC…	Serine/threonine-protein kinase mos OS=Xenopus laevis GN=mos PE=2 SV=1; Accession=MOS_XENLA; E-value=1.0e-50	A7SD99_NEMVE	A7SD99_NEMVE	NA	0.001
SEQINDEX13113_C_c	CTGAGTTATGAAACAGGCAGTGCGACCCATGTTGAACGGTTTGTACGCAAGGTAAAGCTGGCAGAGTTAGATCCCAGAAATGCACCCGACGACGGCTTCGTTCCTCGGGGGACTTCGCAAGTACAAAATAGTGCTTCTTGGAGAGGGTGGAGTTGGAAAATCAGCTCTAACCATGCAGTTTGTGTCCCACTGCTTCTTGGATTACCATGATCCCACAATAGAGGATGCATACCAGCGCCAAGCTGTTATAGATGGAGAGTCAGGATTGTTGGATATTTTGGATACCGCTGGACAACAAGAGTTCACAGCAATGAGAGAACAGTACATGCGAAGTGGTGAAGGATTTGTCATAATGTATTCCATCACAGATAGGCAAAGTTTCCGAGAAGTATCACAAGC…	Contig2822	GGGGACAAGAGTAAAAACAAGTCAAGCGAACGAGACAAACAACCATCAACTAAGTTATGAAACATAGGCAGTGCGACCCATGTTGAACGATTTGTACGCAAGGTAAAGCTGGCAGAGTTAGATCCCAGAAGAAATGCACCCGACGACGGCTTCGTTCCTCGGGGGTCTTCGCAAGTACAAAATAGTGCTTCTTGGAGAGGGTGGAGTTGGAAAATCAGCTCTAACCATGCAGTTTGTGTCCCACTGCTTCTTGGATTACCATGATCCCACAATAGAGGATGCATACCAGCGCCAAGCTGTTATAGATGGAGAGTCAGGATTGTTGGATATTTTGGATACTGCTGGACAACAAGAGTTCACAGCAATGAGAGAACAGTACATGCGAAGTGGTGAAGGATT…	GTP-binding protein Rit1 OS=Homo sapiens GN=RIT1 PE=1 SV=1; Accession=RIT1_HUMAN; E-value=2.0e-64	B3MF50_DROAN	B3MF50_DROAN	NA	0.001
SEQINDEX6165_C_c	ATAGCGGCGTTGGAAAAAGTAGTTTGCTTCTCAGGTTTGCAGATAATACATTTTCAGGAAATTACATTACAACAATTGGAGTTGATTTTAAAATAAGAAAGATAAATGTTGATGGTGAAATGGTTAAGTTGCAAATTTGGGACACCGCTGGACAAGAAAGGTTTCGTACCATAACATCGACATATTATCGTGGAACTCATGGAGTTATTGTGGTATATGATGTAACAAGTGCTGACACTTTTGTTAACGTAAAAAGATGGTTACATGAAATCGATCAAAATTGTGATGATGTTCTTAGAATTTTGGTCGGCAACAAAGATGATGATCCAGAAAGGAAAGTGGTTGAAAGAGATGATGCAAAGAAGTTTGCAGAGCAAATGGGAATTCAAGTATTTGAAA…	Contig4771	GGGGACTTTAGCTTACTTCCTGTGCCAGCGAGAGAACTGTACATTTCGTTGTCGTTTTAAGCCTTTTTAGATGTTTTAATGCTAAATATACTATGGCTGCTAAGGATTATGATCATTTATTCAAGCTGTTAATCATTGGGGATAGCGGCGTTGGAAAAAGTAGTTTGCTTCTCAGGTTTGCAGATAATACATTTTCAGGAAATTACATTACAACAATTGGAGTTGATTTTAAAATAAGAAAGATAAATGTTGATGGTGAAATGGTTAAGTTGCAAATTTGGGACACCGCTGGACAAGAAAGGTTTCGTACCATAACGTCGACATATTATCGTGGAACTCATGGAGTTATTGTGGTATATGATGTAACAAGTGCTGACACTTTTGTTAACGTAAAAAGAT…	Ras-related protein Rab-35 OS=Rattus norvegicus GN=Rab35 PE=2 SV=1; Accession=RAB35_RAT; E-value=4.0e-75	A5D7E0_BOVIN	A5D7E0_BOVIN	A5D7E0_BOVIN	0.001
SEQINDEX13284_C_c	AATCGGAATGGCGTCCAAACGTAAGTTTAACGGTGAGACAAGTCAAGCCCTTGTCCCTGTGAAGAAGCAAAAACAGCACCAGGTAGCGCTTTTAAACCACGAAGGAGTCATACAAGAGCTCCCTCAAAGAACCTCCAGTCTCGATGCGCCTATTATGCTGCTTAGTGGACATGAAGGAGAGATTTTTACGGCAAGATTCCATCCCTCAGGAGAAACTTTAGCATCAGCAGGGTTTGATCGCCTAATTTATCTTTGGAATGTATATGGCGAGTGCGAAAATTTTGCTGTACTTAAAGGTCACACTGGAGCAGTCATGGAACTTCACTTTTCTTTGGATGGAAGTACAATGTTTACAGCCTCCACAGACAAAACTTTAGGAATTTGGGATTTTGAAACAGG…	Contig6729	GGGGGTGGCTTTGAGGGAATCGGAATGGCGTCCAAGCGTAAGTTTAACGGTGAGACAAGTCAAGCCCTTGTCCCTGTGAAGAAGCAAAAACAGCACCAGGTAGCGCTTTTAAACCACGAAGGAGTCATACAAGAGCTCCCTCAAAGAACCTCCAGTCTCGATGCGCCTATTATGCTGCTTAGTGGACATGAAGGAGAGATTTTTACGGCAAGATTCCATCCCTCAGGAGAAACCTTAGCATCAGCAGGGTTTGATCGCCTAATTTATCTTTGGAATGTATATGGCGAGTGCGAAAATTTTGCTGTACTTAAAGGTCACACTGGAGCAGTCATGGAACTTCACTTTTCTTTGGATGGAAGTACAATGTTTACAGCCTCCACAGACAAAACTTTAGGAATT…	WD repeat-containing protein 57 OS=Homo sapiens GN=WDR57 PE=1 SV=1; Accession=WDR57_HUMAN; E-value=1.0e-138	A7RQB4_NEMVE	A7RQB4_NEMVE	A7RQB4_NEMVE	0.001
SEQINDEX4548_C_c	GGAAAGTACTTTGCACATTGTCAGTGTTAATTGCTGCGACTGGCGAGAAAATCAGAGACCCAAACATAGCGTCAAAAATGACCAGCAAGCCAGTATTGAGGGAAGAAGGGATGCTCAAGGAAATCTTTCAACTTTACGATACAAGTGGAGGCGACAAGATTGAAGTAAACAAACTCGGACAAGTTTTGAGATCAGCTGGGTTGAATCCCACTCAGAGTGAAGTCCACAAAGTCGAACGTGATTTGGGGAAGACAACCGTATCTTTCGAAGAATTTTTGCCGATCTACAACTCGGTAGCTCAGCACATGGCGAGTGTAACGAGCAAAGCAACACCTGAACAAATTGTGGATTGTTTTAAGCACTTTGATCGAGACGGAGCAGGCACGATCTCGTCCAGTA…	Contig3219	GGGGAAAGTACTTTGCACATTGTCAGTGTTAATTGCTGCGACTGGCGAGAAAATCAGAGACCCAAACATAGCGTCAAAAATGACCAGCAAGCCAGTATTGAGGGAAGAAGGGATGCTCAAGGAAATCTTTCAACTTTACGATACAAGTGGAGGCGACAAGATTGAAGTAAACAAACTCGGACAAGTTTTGAGATCAGCTGGGTTGAATCCCACTCAGAGTGAAGTCCACAAAGTCGAACGTGATTTGGGGAAGACAACCGTATCTTTCGAAGAATTTTTGCCGATCTACAACTCGGTAGCTCAGCACATGGCGAGTGTAACGAGCAAAGCAACACCTGAACAAATTGTGGATTGTTTTAAGCACTTTGATCGAGACGGAGCAGGAACGATCTCGTCCAG…	Myosin-2 essential light chain OS=Drosophila melanogaster GN=Mlc-c PE=1 SV=1; Accession=MLC2_DROME; E-value=3.0e-25	A7S688_NEMVE	A7S688_NEMVE	A7S688_NEMVE	0.001
SEQINDEX13223_C_c	AAGCCAGTAACTCAGTCCTAGCCCAACTGCCTCTTTTTCTTCGTGGTTATGTTGTGCATGGAATGAGAAGAGGAGGCAAAGATTTAGGGATCCCACGGCTAATTTTCCTGTAAGTGTGGTGGAAAATTTACCGGAAGCCATAAGCACTGGAATTTACTATGGATGGGCAAGTGTTAATAGGGGACCAGTATACAAAATGGTTATGAGTATAGGATGGAATCCATTTTACAAAAACACCAAAAAATCTATGGAGACGCACATTATTCATACTTTTGAGGAAGATTTCTATGGAGCAGAGCTCAGTGTTGCCATTGTAGGATTTATTCGACCAGAAAAGAATTACCCTTCTCTAGAGGCTTTAATTGATGCCATTCATGCTGATATAAAAGAGGCAGAACA…	Contig1966	GGGGGATCGCGTCTGTTCAGGTGTATTGAAAATCATTTTCGTTTATCGGCGATCTTGAAGACTGAAATGCGTTCTGACCTTTTAGCAAGTTGTTTACCGCATTTCTCTCGCGGAGAAGTAGTTAAAGGTTTTGGGAGAGGCAGCAAAGAATTAGGTATTCCCACGGCTAATTTTCCTGTAAGTGTGGTGGAAAATTTACCGGAAGCCATAAGCACTGGAATTTACTATGGATGGGCAAGTGTTAATAGGGGGCCAGTATACAAAATGGTTATGAGCATAGGATGGAATCCATTTTACAAAAACACCAAAAAATCTATGGAGACGCACATTATTCATACTTTTGAGGAAGATTTCTATGGAGCAGAGCTCAGTGTTGCCATTGTAGGATTTATTCGACCA…	Riboflavin kinase OS=Homo sapiens GN=RFK PE=1 SV=1; Accession=RIFK_HUMAN; E-value=3.0e-47	A7RL68_NEMVE	A7RL68_NEMVE	NA	0.001
SEQINDEX14274_C_c	GGGTGGCAACGTCGACCGAAAACAAGTAAAGAAAATTCAAAATGTCTGAAGTCGAGGAATTGCTCAAGAGAATTCAGGGCCATAAGGGTGTGATGGGAATAATTATCGTTAATAACGAAGGAATTCCAATCAGAACGACCTTGGATAACTCAACGACTGTGCAGTATGCGGGTTTGATCCATACGTTGACAGCGAAAGCGCGAAGTACAGTACGAGATATCGACCCACAGAATGATTTAACTTTTCTCAGGATCCGTTCCAAGAAACATGAAATCATGATTGCCCCTGACAAAGAGTATCTGATGATTGTCATTCAAAATCCATCTTCCCAATAGACGGGGTTACATTTTATGCGGGTTTACGTTATTTTGTATCAATGGTCTTGCACCTTACTTTTTC…	Contig1708	GGGGGTGGCAACGTCGACCGAAAACAAGTAAAGAAAATTCAAAATGTCTGAAGTCGAGGAATTGCTCAAGAGAATTCAGGGCCATAAGGGTGTGATGGGAATAATTATCGTTAATAACGAAGGAATTCCAATCAGAACGACCTTGGATAACTCAACGACTGTGCAGTATGCGGGTTTGATCCATACGTTGACAGCGAAAGCGCGAAGTACAGTCCGAGATATCGACCCACAGAATGATTTAACTTTTCTCAGGATCCGTTCCAAGAAACATGAAATCATGATTGCCCCTGACAAAGAGTATCTGATGATTGTCATTCAAAATCCATCTTCCCAATAGACGGGGGTACATTTTATGCGGGTTTACGTTATTTTGTATCAATGGTCTTGCACCTTACTTTT…	Dynein light chain roadblock-type 2 OS=Mus musculus GN=Dynlrb2 PE=2 SV=1; Accession=DLRB2_MOUSE; E-value=8.0e-41	A7SMZ7_NEMVE	A7SMZ7_NEMVE	A7SMZ7_NEMVE	0.001
SEQINDEX8438_C_c	CGGTTTCCGAAGGTTCACAGCTTGCCCAGTGTTTTCTCAATACTCATTAGCTGATAAGCACAAGTTTGAGAGATTCATGCCACAGGAAGGAGCATTCATGGTTACAGTATACGCACCCATTATGTTCCCGCCTGCACCACTTTTGCTGTTCGCACAAGATAAACACACAAGCTGTCATTCTCTCGTTGGAACGGGCTCCCTTTACAGAGTCGATCCAGATAGAATTGTTGCTAAAAGAATTATGTTGAGCGGGCATCCTTATAAGATCAATAAACGATCAGTGGTTGTACGCTACATGTTCTTTTACAGAGAGGACATCCAGTGGTTTAAACCCGTTGAGCTCCACACCAAGCATGGAAGAAGAGGTCATATCCGGGAACCTCTAGGGACACATGGACA…	CCHX2030.g1_c_s	AGAGTCGATCCAGATAGAATTGTTGCTAAAAGAATTATGTTGAGCGGGCATCCTTATAAGATCAATAAACGATCAGTGGTTGTACGCTACATGTTCTTTTACAGAGAGGACATCCAGTGGTTTAAGCCCGTTGAGCTCCACACCAAGCATGGAAGAAGAGGTCATATCCGGGAACCTCTAGGGACACATGGACACATGAAGTGTGTTTTTGACGGTAACATCAAATCTCAAGACACTGTTTGTATGAATTTGTACAAGCGAGTGTTTCCTAAATGGACTTACGAGCCTACAGTTATGTCACCGCCACCAGAATCTCCGAAAGACGACAGTGATGGCATGGAGATATAAACAAAAGGTCATCACTTGCAGCGTGATCTGGGCAGAGTTTTGAGGACGAGG…	Pre-rRNA-processing protein TSR1 homolog OS=Mus musculus GN=Tsr1 PE=2 SV=1; Accession=TSR1_MOUSE; E-value=5.0e-66	A7SGF5_NEMVE	A7SGF5_NEMVE	NA	0.001
SEQINDEX14689_C_c	CGGTGGATTTAGCTGCACGCGGAGCAAGAGTTATCATCGGCTGCAGAAATCTCGAAAAAGGGACGGAAGCGCTGAAAGAAATTCAAGATCGCAGTGGCAACAGAAACGTTTTTCTTGAGAAGCTTGACCTGGCTTCGTTGGAGTCAGTCCGTACATTTGCAGACAAAATCCTCAACAGCGAGCCTCGCGTAGACATCTTGATAAACAACGCTGGAGTGATGGCCTGTCCTTACCAGAAGACTCAAGACGGATTTGAAATGCAGTTTGGTGTGAATCATCTTGGCCACTTTCTTCTGACATTGCTACTTCTTGATCGGTTGAAGAGTTCCCAGCCGAGCCGAATAATAAACGTGTCCTCGTCAGCTCATCGAATGGGAACGGGAAAGATAAAGTTTGATG…	Contig3169	GGGGAAAACAAACAATAACAAATTATACAAATGGCTGCCCAAATTGCCGTTGGTGCGGCTGTAGTAGTAGGTCTATGTGCGGGTAAAAAGTACTTCCAAGGGCCAAGATGCCAGAGCAGCAAAAGCTTGCAAGGGAAAACGGTTGTCATCACTGGCGCAAACACTGGTATCGGAAAAGAGACTGCAGTGGATTTAGCTGCACGCGGAGCAAGAGTTATCATCGGCTGCAGAAACCTCGAAAAAGGGACGGAAGCGCTGAAAGAAATTCAAGATCGCAGTGGCAACAGAAACGTTTTTCTTGAGAAGCTTGACCTGGCTTCGTTGGAGTCAGTCCGTACATTTGCAGACAAAATCCTCAACAGCGAGCCTCGCGTAGACATCTTGATAAACAATGCTGGA…	Retinol dehydrogenase 14 OS=Homo sapiens GN=RDH14 PE=1 SV=1; Accession=RDH14_HUMAN; E-value=1.0e-61	Q6DC71_DANRE	Q6DC71_DANRE	Q6DC71_DANRE	0.001
SEQINDEX12934_C_c	AGACAGTCCGAGAAGTTACAGGAGGATTCAAGCTGAGAAAAAGAAATCCATGGCGAAGGGGGCCACTGTATCGTGGTTTTCTGATCAACTAAGCCGTGGGTCTTTTCTCTTGCTTCTGGACTGTAGACCGTTTGCCGAGTTCGCCCGTTCTCATGTTCAGGGGCTATCAACTTGACGATTCCTTCGTTGATGCTGCGGCGTCTTAAGAAAGGGGCCAACTTTGCCATTAGTTCGTTCATCACATCAGATGAGGGCAAAGCGCAATTTAACAGGAATCTTCTGCATGCTTCGGGAATTGTTCTCTATGATTCAGTAACTTCAGATTTATCGGCTGTTTGTACAAACAGTGCTCTCGGTGTTCTACTAAAGAAGTTCAGTGAAGATGTCAACACCCCCGTT…	Contig3706	GGGGGCATTTCGAGAAGTTATCATAAACTTAACCGCGGCTTCGGGAACGAGATTTCAACTACAAATGCCTTCACTGCTGATAGACAGTCCGAGAAGTTACAGGAGGATTCAAGCTGAGAAAAAGAAATCCATGGCGAAGGGGGCCACAGTATCGTGGTTTTCTGATCAACTAACCCGTGGGTCTTTTCTCTTGCTTCTGGACTGTCGACCGTTTGCCGAGTTCGCTCGTTCTCATGTTCGAGGGGCTATCAACTTGACGATTCCTTCGTTGATGCTGCGGCGTCTTAAGAAAGGGGCCAACTTTGCCATTAGTTCGTTTATCACATCAGATGAGGGCAAAGCGCAATTTAACAGGAATCTTCTGCATGCTTCGGGAATTGTTCTCTATGATTCAGTAAC…	Dual specificity protein phosphatase 7 OS=Mus musculus GN=Dusp7 PE=2 SV=3; Accession=DUS7_MOUSE; E-value=4.0e-67	A7RTA2_NEMVE	A7RTA2_NEMVE	NA	0.001
SEQINDEX2548_C_c	AGGAAATCCGTCATTTTGGGGGAAGTGATTTCATATATCAACAACTCCATGAATGTCAAAATAACGACCTTGGCCAGGGTGATTTGAGGGATTTGCTGCTCTGTATGCAATCCCTTTAAACTGTCAGCAACCGTCCGTTGGTTACTAATTAACCGAAATCAACTTTCAAAATTGCAACACAACATGAATGTGAAGGAATATAAAGTCGTTGTTTTAGGTTCCGGTGGAGTTGGAAAAAGTGCCTTGACTGTTAAATTTGTCACAGGAACGTTTGTAGAAAAATATGATCCAACAATTGAGGATTTTTATCGCAAGGAGATTGATGTGGATAACAATCCCTCCATATTGGAAATTTTGGATACCGCGGGGACAGAACAATTTGCATCCATGCGGGATTAT…	Contig929	GGGGACGTGTTGTTCCCTGAGGCAAAGAGAAGAGTACATTTATTGAACAGGAAAGGAAATCCGTCATTTAGGGGAAGTGATTTCATATATCAACAACTCCATGAATGTCAAAATAACGACCTTGGCCAGGGTGATTTGAGGGATTTGCTGCTCTGTACGCAATCCCTTTAAACTGTCAGCAATTGTCCGTTGGTTACTAATTAACCGAAATCAACTTTCAAAATTGCACACAACATGAATGTGAAGGAATATAAAGTCGTTGTTTTAGGTTCCGGTGGAGTTGGAAAAAGTGCCTTGACTGTTAAATTTGTCACAGGAACGTTTGTAGAAAAATATGATCCAACAATTGAGGATTTTTATCGCAAGGAGATTGATGTGGATAACAATCCCTCCATATTG…	Ras-related protein Rap-2a OS=Homo sapiens GN=RAP2A PE=1 SV=1; Accession=RAP2A_HUMAN; E-value=2.0e-56	A7SZN4_NEMVE	A7SZN4_NEMVE	A7SZN4_NEMVE	0.001
SEQINDEX15341_C_c	GGAACTTCCAGGGAACTTCATTCTAGTGATGACGACGAATTAGACGAACTTCTGGACAGTGCTCTAGAGGACTTTGACAAAAATACCCCGTCAACCACAAAACAGTGTGTGGAGAATGAATCCAAACCATCTGTAAGCAGCTCTGTTGAGGCACGAGAAGATAAAGGTGTACAAGGTTATACAGGTGAAGTTGTGCAAGATGACTCAGCTGTCGAGATGGAAGCCCAGTTTGCAAAGGCAGCAGAAGACTTTGAAAATGCTATGAAAACAATGCTAGGAAATGAGCCTGAAATACTTGCCCAGTTGGGTCAGTTCTCCAAAGCTGCAGCTAATGCTGACCCTGGCAACCCATCAGGAGTAACTGATTTTGAAGCACATTTGGCAAGAACCATGAGTCAT…	CCHX12518.b1_c_s	GGGCATGGCAGATATGAACCTTGGAGAAGGTGGTGAAGGGGAAATGGACTTCCTTCCTTTGATGCAGGGCATGATGCAAAACCTTCTCTCCAAAGATGTACTTTATCCTGCCTTAAAAGATTTACAAGAAAAGTATCCAGCATGGTTGGAAGAGAAAAAGTCCTCTTTGCCAGAAGAGGAACTGAATCGCTACAAAAAACAATTCAGTTTGGTGTCAAATGTTTGTTCTGAATATGAGAATGAGAAAGAAGATGAGCCTGATGACATCAAGAAGAAAAGATTTGAAAAACTTTTGGGTCTAATGCAACAGATGCAAGAATGTGGGCAACCACCAACCGAACTTGTTGGAGAAATGCCTCCAGGTTTTGCGGGTCCAATCTCAGAGATGCCAGATCCCCC…	Peroxisomal biogenesis factor 19 OS=Rattus norvegicus GN=Pex19 PE=2 SV=1; Accession=PEX19_RAT; E-value=6.0e-35	A7S8I7_NEMVE	A7S8I7_NEMVE	NA	0.001
SEQINDEX6068_C_c	TTGCGTTCTTCGAGGTATACGCACGCTGATAGAGAATCTTCGCGCCGCCCAAAGAAGAACCCAAGGACCTTTGATTCCTGCGAAAACGATCGAAGGCATAAAAGAGCAATTATTTCAGAAGACCAATTCATTCCCCTTATACCATCTGCTGCGAGTGATCCCAAGGAAAACTCAGCTGAGAGCAAAGGTTTTCAATCTTCAAGGAACCCATGGACTGAAAACAGGAAAACTCCTTTAGAAAACTCAACACAACACAAAGAAAATCNATCAATAGACCTCTCTCTGGAATTCCCCCCTCTGGGTGTTTCAAGCTTCTCTGCCACACCTGNAAGTTAGCAAAGATTGGGGAAGCTTGGTTGAAGAAGAAGAAGAAAGAGAAGCAAGTTTACAGAAGAAGGA…	AOKG1375.b2_c_s	GGGGGAGATTGTCTTTTATTCTTCTTCTTTTAAAGCCCTTTTTATGTCACTATGGATATCATACCTAAAGAAATAGGAAAATACCGACGCTCCCGTTTGAAAGGCGATGAAAGGTTGCGTTCTTCGAGGTATACGCACGCTGATAGAGAATCTTCTTCGCGCCGCCCAAAGAAGAACCCAAGGACCTTTGATTCCTGCGAAAACGATCGAAGGCATAAAAGAGCAATTATTTCAGAAGACCAATTCATTCCCCTTATACCATCTGCTGCGAGTGATCCCAAGGAAAACTCAGCTGAGAGCAAAGGTTTTCAATCTTCAAGGAACACATGGACTGAAAACAGGAAAACTCCTTTAGAAAACTCAACACAACACAAAGAAAATCAACCAATAGACCTCTCT…	Histone RNA hairpin-binding protein OS=Homo sapiens GN=SLBP PE=1 SV=1; Accession=SLBP_HUMAN; E-value=7.0e-16	A7RH28_NEMVE	A7RH28_NEMVE	NA	0.001
SEQINDEX19208_C_c	TGTCGGATGTAGAACCGGGAAAGGCAAAGGCCGCTGGAATTGTTGGTATCATTATTGGAGTGACAGGTTTGGTGAACTTCATCTGTGGCTGCATCTACACCAGTTTTGGTCCAAAGGATGCCTCTGGTTTATGGTCTGGTATTGGGCAAATTATCATTGGCATCCTGGGCATTGTGACATGGTTGAAGCTCAACAAGATGACGTTTGTATTTTTCTTGGTGTTCAACATCCTCTGGTTGATTATACTCATCATCCAAGTTGTCGTTGCCCTCATTGCCTGGTTGATCTGGTACGTTATACGCAAAGTGGTGGAAACAAACTGTTCTGAAAGTCCACAAGGGTGCGTTTGCAACGCAGATAAGAGTCTGCCGATTGGAGTGGACAAATGCAGCGACATCA…	Contig4646	GGGGGTTGGCTGGGAGACGTTTCGTTTTCGTTGTCAAGACGTTTTCGTACGGCGCAAATTTATAGTCAATCCTTTGAAACCAAAAAAGTTAGAAAGAAACAACAGCAAAAAAAATGTCGGATGTAGAACCGGGAAAGGCAAAGGCCGCTGGAATTGTTGGCATCATTATTGGAGTGACAGGTTTGGTGAACTTCATCTGTGGCTGCATCTACACCAGTTTTGGTCCAAAGGATGCCTCTGGTTTATGGTCTGGTATTGGGCAAATTATCATTGGCATCCTGGGCATTGTGACATGGCTGAAGCTCAACAAGATGACGTTTGTATTTTTCTTGGTGTTCAACATCCTCTGGTTGATTATACTCATCATCCAAGTTGTCGTTGCCCTCATTGCCTGGTTGA…	NA	A7SFP9_NEMVE	A7SFP9_NEMVE	NA	0.001
SEQINDEX3170_C_c	GCACGAGTGCACTGTCATTCCCTCAACATGTCTCGGCGCTATGACACAAGGACTACGATATTCTCGCCAGAAGGGCGTCTGTATCAAGTGGAATATGCTATGGAAGCCGTCGGTCATGCTGGCATTTGCCTAGGAATTTTAGCCAATGACGGGATTGTAATGGCTGCTGAGCGACGAAACACAAACAAACTCCTTGATGATGTGTTTGCTTCAGAAAAGATTTATAAGCTTCATGAGGACTTTGCTTGTAGTGTGGCCGGCATAACTTCCGATGCAAATGTGCTGACGAATCAACTTCGACTTATTGCTCAAAGGTACTTATTGCAATTTCAAGAGCCAATTCCCTGTGAACAACTTGTCAGCTCACTATGTGATGTTAAACAATATTACACACAGTTT…	Contig205	GGGGGTGCACTGTCATTCTCTCAACATGTCTCGGCGCTATGACACAAGGACTACGATATTCTCGCCAGAAGGGCGTCTGTATCAAGTGGAATATGCTATGGAAGCCGTCGGTCATGCTGGCATTTGCCTAGGAATTTTAGCCAATGACGGGATTGTAATGGCTGCTGAGCGACGAAACACAAACAAACTCCTTGATGATGTGTTTGCTTCAGAAAAGATTTATAAGCTTCATGAGGACTTTGCTTGTAGTGTGGCCGGCATAACTTCCGATGCAAATGTGCTGACGAATCAACTTCGACTTATTGCTCAAAGGTACTTATTGCAATTTCAAGAGCCAATTCCCTGTGAACAACTTGTCAGCTCACTATGTGATGTTAAACAATATTACACACAGTTTGG…	Proteasome subunit alpha type-4 OS=Rattus norvegicus GN=Psma4 PE=1 SV=1; Accession=PSA4_RAT; E-value=1.0e-112	Q6WN57_BRABE	Q6WN57_BRABE	Q6WN57_BRABE	0.001
SEQINDEX1952_C_c	GGACTTACCAAGATGGCGGCACAAATGAAACAAATGTTAAACTCTCCGTCCAACACTGGAGGCTCGCACAAGGATATCACAGGAAAATATCGCGAAATTCTGGAAAAGGTTTTCAAATTCCAGGAGCCATCCCTCTCAGAAGCTCTCAAAGTTTTTATTGAGGCCGTTGTTCATGAGAGTGTAAGCCTTGTTGTGTCAAGACAAGTGTTAACAGAGCTTTGCAGCTACATTCCAAACATGGAATCAATGTCAGCAAAGAATGTATCACACTTTATACTGGACAAATTGCAACCAAGGGCTATCTCATTTGAGGAACAGGTTGCAACTATACGAAAACACTTAGCTAAAATGTATGAAGATTGCCAGCAATGGAGAGAAGCTGCAAGGGTTTTAACAGGG…	Contig4202	GGGGGACTTACCAAGATGGCGGCACAAATGAAACAAATGTTAAACTCTCCGTCCAACACTGGAGGCTCGCACAAGGATATCACAGGAAAATATCGCGAAATTCTGGAAAAGGTTTTCAAATTCCAGGAGCCATCCCTCTCAGAAGCTCTCAAAGTTTTTATTGAGGCTGTTGTTCATGAGAGTGTAAGCCTTGTTGTGTCAAGACAAGTGTTAACAGAGCTTTGCAGCTACATTCCAAACATGGAATCAATGTCAGCAAAGAATGTATCACACTTTATACTGGACAAATTGCAACCAAGGGCTATCTCATTTGAGGAACAGGTTGCAACTATACGAAAACACCTAGCTAAAATGTATGAAGATTGCCAGCAATGGAGAGAAGCTGCAAGGGTTTTAACA…	COP9 signalosome complex subunit 4 OS=Mus musculus GN=Cops4 PE=1 SV=1; Accession=CSN4_MOUSE; E-value=1.0e-170	Q14AI7_MOUSE	Q14AI7_MOUSE	Q4S252_TETNG	0.001
SEQINDEX12826_C_c	CGTGTACTGTGACTTCGAAAACAAGAGGGCCTGTGTCCAACCTAAGAAGGAAAATATCTCAATTGATGAAGCGCAGTCCAAGCAGTGGATAAGTGAGAGTCACCCGGGTGACCAGCTTATTCAATACCAGATGGATCCGGGACAGATGAAATTCCTGCGGCTTCTGAGCACGCGCATGACGCAGACTATAACTTATCATTGCTACAATTCCCGCGCATGGGAGGACGAGAATGACCGCACGATCAAACTTCAAGGAGACAACGAAATGGAACTAACTTCATCAGAGAAAACCAAACCCAGAGTTGTTACAAACAACTGCGATAATAAAGACGGTTCTGGCATCAGACGGTCCTCGAGATTGACACGAAACAAAAGAACGCCTTGCCCGTCATGGATGTC…	Contig4424	GGGTAACTACAAGAGACAGGACGGGACCAGGTTCCACCCGGCCCGCTCTTGCAGAGATGTGCAACTCGAGAGTGGCGACTCTGTGAAAAGCGGGTATTATTGGATTGACCCGAACGAGGGTTGCTTCAGTGACGCAGAGTATGTGTACTGTGACTTCGAAAACAAGAGGGCCTGTGTCCAACCTAAGAAGGAAAATATCTCAATTGATGAAGCGCAGTCCAAGCAGTGGATAAGTGAGAGTCACCCGGGTGACCAGCTTATTCAATACCAGATGGATCCGGGACAGATGAAATTCCTGCGGCTTCTGAGCACGCGCATGACGCAGACTATAACTTATCATTGCTACAATTCCCGCGCATGGGAGGACGAGAATGACCGCACGATCAAACTTCAAGGAGA…	Collagen alpha-1(II) chain OS=Xenopus laevis GN=col2a1 PE=2 SV=2; Accession=CO2A1_XENLA; E-value=3.0e-16	A7RG67_NEMVE	A7RG67_NEMVE	NA	0.001
SEQINDEX5792_C_c	CAGACCTTAAATGACGACGATGGTAGATGACAAAGCGACTGCCAAAGATCTAGAGTCATGGATCGAGCAGTTAATGGAATGCAAACAGCTTAGCGAGGCTCAAGTGAAAACGCTCTGCGACAAGGCCAAAGAAATCCTAAGCAAGGAGTCAAATGTCCAGGATGTGAAATGCCCTGTGACAGTCTGTGGAGATGTGCATGGCCAGTTTCATGATCTTATGGAGCTATTTAAAATAGGAGGAAGGTCACCAGATACTAATTATCTGTTCATGGGTGACTATGTTGATAGAGGATATTATTCTGTTGAGACTGTTACTCTCCTGGTCACTTTGAAGGTCCGTTTTCCTCATAGAATTACAATTTTGCGCGGTAACCATGAGAGCCGACAGATTACTCAGGT…	CCHX2072.b1_c_s	GGGGGGTGTCGATCCGACGGCCATCACAACTTCGGACGTTGGGAAGGGTTAGGGACAGACTTTAAATGACGACGATGGTAGATGACAAAGCGACTGCCAAAGATCTAGAGTCATGGATCGAGCAGTTAATGGAATGCAAACAGCTTAGCGAGGCTCAAGTGAAAACGCTCTGCGACAAGGCCAAAGAAATCCTAAGCAAGGAGTCAAATGTTCAGGATGTGAAATGCCCTGTGACAGTCTGTGGAGATGTGCATGGCCAGTTTCATGATCTTATGGAACTATTTAAAATAGGAGGAAGGTCACCAGATACTAATTATCTGTTCATGGGTGACTATGTTGATAGAGGATATTATTCTGTTGAGACTGTTACTCTCCTGGTCACTTTGAAGGTCCGTTTTC…	Serine/threonine-protein phosphatase 2A catalytic subunit beta isoform OS=Bos taurus GN=PPP2CB PE=2 SV=1; Accession=PP2AB_BOVIN; E-value=1.0e-164	A7T2Q5_NEMVE	A7T2Q5_NEMVE	A7T2Q5_NEMVE	0.001
SEQINDEX14942_C_c	GGAGATCGTTTGGAAAGATGGTCGAGAGAATAAAGGAGAGCCAGCTGTCTGCTTCAATAAACCAGAAGTTAGTGGAGTCAGGAGAACGAGAAAAGTTGAAGGAGCTTCTAAGAACTAGGCTTATAGAATGTGGATGGCGTGACAAGTTAAGGAGTCATTGCAAAGATGTGATTAAGCAGAAAGGCCTTGAAAATGTAACTGTTGATGATCTTGTAGCTGAAATAACTCCAATGGGAAGAGCATTGGTTCCTGACGAAGTGAAAAGAGATATGCTGCTTAGGATCCGTTCATTTCTGGCTGAAAATTCATAGCACATCGTACATTTGTACAAGTTTGTGAAATATTAAGTTGCTTTGAAAAAGTACGACTTGTTTACTTAAAGTCATTTTCATGATCACA…	CCHX16733.b1_c_s	GGGGAAGAAACAGCAGATCGTTTGGAAAGATGGTCGAGAGAATAAAGGAGAGCCAGCTGTCTGCTTCAATAAACCAGAAGTTGGTGGAGTCAGGAGAACGAGAAAAGTTGAAGGAGCTTCTAAGAACTAGGCTTATAGAATGTGGATGGCGTGACAAGTTAAGGAGTCATTGCAAAGATGTGATTAAGCAGAAAGGCCTTGAAAATGTAACTGTTGATGATCTTGTAGCTGAAATAACTCCAATGGGAAGAGCATTGGTTCCTGACGAAGTAAAAAGAGATATGCTGCTTAGGATCCGTTCATTTCTGGCTGAAAATTCATAGCACATCGTACATTTGTACAAGTTTGTAAAATATTAAGTTGCTTTGAAAAAGTACGACTTGTTTACTTAAAGTTATT…	Enhancer of yellow 2 transcription factor homolog OS=Mus musculus GN=Eny2 PE=2 SV=1; Accession=ENY2_MOUSE; E-value=3.0e-25	B2RE52_HUMAN	B2RE52_HUMAN	NA	0.001
SEQINDEX7122_C_c	TTCCTTCGCTTACATTTCGCATGGTTAAAGTGTAGATAAGGATTATGCTCAAACGTTGGCAAACGGTGGTTGAAAACTGTTCTTTGTCACTAGAACACGATACGAAAAGGAAGTGACGTCGAAAAGGTTGGGCTTCTAGGGCGCGTGTTGGTAATATTACAAGTCAAGTTGCCTGTTTGGAGTCCTTGAAACCGTGAAATCCGATAATCTTACTTCATATGACGGAGCTGTGATCGACGAAAAATCGGAGTTGGCTTTTGGTGAAGATTTTCCTCGATGGTGATAGCGAAAGTGACAAGTAGTGTAATTTTTCATGTAAATGGCAGGCAAGCCATCAACCACAACTATAAATGGCGATGACCGCGGGGACAGAAATGGCTCTAGTTACCAAGATACAAA…	CCHX9845.g1_c_s	TAGATTCATCCAGCGATCGCTTGAAACAATTCTCGTTGAAGCCAAAGGATTTGCAGATTTGTTTTGTGGACGATACTCTTCTGAGTGATATTGAAGGTGACGAAGATAGTTGTCTAATTAAAGAGTACATTATTGATAAACAAGAGATTTCTGATGAAGAGAAAAGAGACTCGGGCTGTGTTGCCGGCGATGATGAAATGTCAGAATCGTTCAGTATAAAAACAGTCAATCCCGAAGCACTGAAAAGCCAAGATATATCGCAAGCGGAAACCGAAAAGGTTTTACTAGAACTGAAGAAGCAAGACAGTGATTGTGGAGAGAAGGATGAGAAATATTCTATTGTTATGTCAGGCTGGACCGAGAGGAGACTAAATGAATTGACTGTTGCTGAACTAAGAG…	NA	A7RYK1_NEMVE	A7RYK1_NEMVE		0.001
SEQINDEX9979_C_c	GACTTGAGCTTCAACACACGGTTGGGATTGTCGGAAGAGGAGAACGTTGAGAGTGTTTTTGCATTGAAATCTCAGAAAATATTTCATTATGTTTAAAAACACTTTTCAGTCGGGTTTCCTATCCATATTGTACAGTATAGGAAGCAAGCCATTACAAATATGGGACAAGAAGGTCAGGAATGGACATATCAAGAGAATAACTGATAATGACATCCAGTCTCTCGTTTTGGAAGTGGTTGGAACAAATGTCAGCACAACATACATTACATGTCCTGCTGATTCCAAAAAGACTCTTGGAATAAAGCTACCCTTCCTGGTGATGATCATAAAAAATTTGAAAAAATACTTTACCTTCGAAGTTCAGGTCCTAGACGACAAGAATGTAAGGAGACGTTTTCG…	Contig4324	GGGGAAACACTTGTGCTTAGCGACAAAACTGTTCACTTGAGCTTCAACACACGGTTGGGATTGTCGGAAGAGGAGAACGTTGAGAGTGTTTTTGTATTGAAATCTCAGAAAATATTTCATTATGTTTAAAAACACTTTTCAGTCGGGTTTCCTATCCATATTGTACAGTATAGGAAGCAAGCCATTACAAATATGGGACAAGAAGGTCAGGAATGGACATATCAAGAGAATAACTGATAATGACATCCAGTCTCTCGTTTTGGAAGTGGTTGGAACAAATGTCAGCACAACATACATTACATGTCCTGCTGATTCCAAAAAGACTCTTGGAATAAAGCTACCCTTCCTGGTGATGATCATAAAAAATTTGAAAAAATACTTTACCTTCGAAGTTCAGGT…	UPF0468 protein C16orf80 homolog OS=Xenopus tropicalis PE=2 SV=1; Accession=CP080_XENTR; E-value=1.0e-106	A7SJZ7_NEMVE	A7SJZ7_NEMVE	NA	0.001
SEQINDEX11750_C_c	AGCAAGCTAAACAACTCTTACAAGCCGCACATTGGCAGTTCGAGACTGCTTTGAGTTTGTTTTTCCAAGAAGCAGCGATTCCTTCACATTCGCAACACAACGCGCTTGTAACGCCAGCAAATACACCCGCTACTCCACCGAACTTCCCAGACGCCTTGCTTGCCTTTTCGAAACTTCAAGCTTCGGATAGTAGCTCCAAGCCACAGCCTTTGAACGCCAGTCACCAACCCGTGAGATGATTTTATTTACGCAACATTGTTGTCATCTTGCACTATCCGTTCATTGTATTTGTGTAATTCCGCCGTATCTTTCATCTACGCAGCATTACTAGACCCTTTTTTTATAACAATGCGTTAAAATACAAGATAATTAGTGGATTCATCGTCGACAGTAAGCTGC…	Contig103	GGGACAGCGTTTTCGTACCGTACACCGAAGCGTAAGCGAGTGCTAGTAGTGTGGTGTTGTTTTTGTCATTTTTTTCTTCAAATGGACGCCTTAAAAGAACAAGCCATGATAAATCAGTTTGTCATGGCGGCTGGGTGTGCCAGAGAGCAAGCTAAACAGCTCTTACAAGCCGCACATTGGCAGTTCGAGACTGCTTTGAGTTTGTTTTTCCAAGAAGCAGCGATTCCTTCACATTCGCAACACAACGCGCTTGTAACGCCAGCAAATACACCCGCTACTCCACCGAACTTCCCAGACGCCTTGCTTGCCTTCTCGAAACTTCAAGCTTCGGATAGTAGCTCCAAGCCACAGCCTTTGAACGCCAGTCACCAACCCGTGAGATGATTTTCTTTACGCAAC…	Protein FAM100B OS=Homo sapiens GN=FAM100B PE=1 SV=1; Accession=F100B_HUMAN; E-value=5.0e-10	A7RJI9_NEMVE	A7RJI9_NEMVE	NA	0.001
SEQINDEX12505_C_c	TCAAAACGCTCTCAAAGTGCTGAGAAAGTGTAGATTTAGATCAGAGAAGCCAGGTGAATTTGCTCAAGTTAACTACAGCTAAATATAGACGGCTATTTTTAACCCTTTCGCCGACCAATTAGTTCGATTCACCGACACATTATCTCTCGGCCAATATATTGAGATCTACATACAACACGATGTGCGCAAGATGGCTGCTTCTAGTAACAACTGGGTCAAGCTAAATGTCGGTGGAACCTCCTTTTTAACGACAAAACAGACACTTTGTAGACATCCCAACTCTTTCTTACATAGACTGTGTGCAGAGGACCCCGATCTGCCTTCGGATAAGGACGAAAATGGAGCCTACATGATTGATCGCGACCCTCGCTATTTTGGACCAGTTTTGAACTATTTAAG…	Contig730	GGGGATACAACACGATGTGCGCAAGATGGCTGCTTCTAGTAACAACTGGGTCAAGCTAAATGTCGGTGGAACCTCCTTTTTAACGACAAAACAGACACTTTGTAGACATCCCAACTCTTTCTTACATAGACTGTGTGCAGAGGACCCCGATCTGCCTTCGGATAAGGACGAAAATGGAGCCTACATGATTGATCGCGACCCTCGCTATTTTGGACCTGTTTTGAACTATTTAAGGCATGGAAAGCTCATAATCGACAAAGATCTTCTAGAAGAAGGTGTTTTAGAGGAGGCTGAATTTTATAATATTGATCCACTTGTTAGACAAATAAAGGAAAAAATACAGTCCCGTGAAGCTCGTCTAAAACATCCCTTCCAATCAAAGAAACACGTATACAGAGT…	BTB/POZ domain-containing protein KCTD5 OS=Mus musculus GN=Kctd5 PE=2 SV=1; Accession=KCTD5_MOUSE; E-value=1.0e-73	A7S880_NEMVE	A7S880_NEMVE	A7S880_NEMVE	0.001
SEQINDEX182_C_c	ATCAAGTGCTGAAACTTGAACCATCTTCAGAGTTGCGATTTCGGGGTTCTTTTACAAAAGTTGTGACAGCCAATCTGAAACTAACAAACCCTACAGACAAGAATGTCTGCTTCAAAGTCAAAACGACAGCTCCAAAAAGATATTGCGTTCGCCCAAATAGTGGGTTTGTGGAGCCTCATGGTGTTGTAGAAGTTGCCGTTATGTTGCAGCCGTTTGACTATGATCCCAAGGAAAAGAGTAAACACAAATTCATGGTTCAGACAATGCTTGCTCCAGAGGGAGAAATGGACCATGAGACTCTGTGGAAAGAGGCTGATCAAACTTCATTTATGGACTCCAAACTTAAATGTGTGTTTGACTTTGTGGGAGACAGTGATGACCCAGTCAGCATTGGCGTAG…	Contig270	GGGGGGAACATGCTCTCAAATAGTCGTCATCGTTCACTTATCTCTGGTTAGCGTTGCCGTTTGTATGTTTTATTGAAAGTCGACGTGGATTTTTGGGTTTGAAATCATATCATAGGGTTGATATCTTCAAAAATGTCCAAAGGAGATCAAGTGCTGAAACTTGAGCCATCTTCAGAGTTGCGATTTCGGGGTTCTTTTACAAAAGTTGTGACAGCCAATCTGAAACTAACAAACCCTACAGACAAGAATGTCTGCTTCAAAGTCAAAACGACAGCTCCAAAAAGATATTGCGTTCGCCCAAATAGTGGGTTTGTGGAGCCTCATGGCGTTGTAGAAGTTGCCGTTATGTTGCAGCCGTTTGACTATGATCCCAAGGAAAAGAGTAAACACAAATTCATG…	Vesicle-associated membrane protein-associated protein B OS=Bos taurus GN=VAPB PE=2 SV=1; Accession=VAPB_BOVIN; E-value=3.0e-48	A7SAN7_NEMVE	A7SAN7_NEMVE	NA	0.001
SEQINDEX15097_C_c	GGAGGCTTTTGCGGAATTGGCATTGTACTAGTGCTGCACAATCGCTCTCTTTTTTCAACACTTTTCGCCTAAATTTTAAGTACAACATGCCCCGTAAAGCTATGAAAGTCATAGTAGAGCTGGACATTCACACATTAACATGCCCTGGAACTTATCTTCGAGACTATGGCTATCTTTATCTCAAAGTAAACTGCATGGGCTTAGAAGTGAACACGAAATCTGTGTCTCCAACATTTCCCTTGTTCTTTCACGAACGTTTGCGTTTCGAACGGGTTTTCAAGAGCTGTCAAGATCCCGCTTATGTGACTATTCATCTCAAAGGTGAAGATGTTTTGGTTGAGTTAAGACAACACGATGATTACGTCTCTGATGGCTATGTTATTGGTCACTATGCCAACA…	Contig1229	GGGGGAGTATCGTGCGTGTTTGTAGCAGCCGGAGGCTTTTGCGGAATTGGCATTGTACTAGTGCTGCACAATCGCTCTCTTTTTTCAACACTTTTCGCCTAAATTTTAAGTACAACATGCCCCGTAAAGCTATGAAAGTCATAGTAGAGCTGGACATTCACACATTAACATGCCCTGGAACTTATCTTCGAGACTATGGCTATCTTTATCTCAAAGTAAACTGCATGGGCTTAGAAGTGAACACGAAATCTGTGTCTCCAACATTTCCCTTGTTCTTTCACGAACGTTTGCGTTTCGAACGGGTTTTCAAGAGCTGTCAAGATCCCGCTTATGTGACTATTCATCTTAAAGGTGAAGATGTTTTGGTTGAGTTAAGACAACACGATGATTACGTCTCTG…	Spermatogenesis-associated protein 6 OS=Homo sapiens GN=SPATA6 PE=1 SV=1; Accession=SPAT6_HUMAN; E-value=2.0e-15	A7SQL7_NEMVE	A7SQL7_NEMVE	NA	0.001
SEQINDEX9783_C_c	GCTCGTGGGCGATCCTCAAGTTGGAAAAACTTCATTAATTTTGTCCCTGGTCAGTGAGGAATTCCCAGAAGAGGTTCCAACCAAAGCAGAGGAAATAACAATTCCTGCTGATGTCACTCCAGAAAAAGTCCCAACGCACATTGTGGATTACTGTGCCTTAGAGCAATCAGAAGACATGCTAGTAGATGAAATTATCAAGGCAAATGTAGTTTGTGTGGTCTTTGATGTGATGGTGGAGGAGACTCTTGAAAGGATAACCTCATACTGGTTGCCACTCATAAGGCAGGCTGCAGAGGAAGATGACACAGCAAAACCTGTCATTATAGTTGGTAACAAATCTGATCTCTCAGATGGAAGTGTAATAGATACTATTTTACCAATAATGAATGACTTTTCTGA…	CCHX2079.b1_c_s	GGGGATTACTTCCCAATTTTATTGAGGCGGTAAATATGGACCAAAAATGAGTGGAAAGAAGGAGTGGAAAATCGAAATCTAGATCTCTTTATGCCAAACTGAGTTTCTTATAATTGTTTTTTCATCATTAAAATCGATTGTCGTTCGGTTAGTTTTGTAAAATATAATCTCGATTATATGCTAAATAATGAAGGACGTACGAATATTGCTCGTGGGCGATCCTCAAGTTGGAAAAACTTCATTAATTTTGTCCCTGGTCAGTGAGGAATTCCCAGAAGAGGTTCCAACCAAAGCAGAGGAAATAACAATTCCTGCTGATGTCACTCCAGAAAAAGTCCCAACGCACATTGTGGATTACTGTGCCTTAGAGCAATCAGAAGACATGCTAGTAGATGAAAT…	Mitochondrial Rho GTPase 1-A OS=Danio rerio GN=rhot1a PE=2 SV=1; Accession=MIRO1_DANRE; E-value=1.0e-127	A7SCK4_NEMVE	A7SCK4_NEMVE	NA	0.001
SEQINDEX13050_C_c	ACCAAGTTCTTTGCTCATTATTCAGAAGACATGCAACATCAGATTATTAGAGAGACATTTCATATTGTGTCAAGGAGAGATGACAATGTTTGTAATTTCTTGGAAGGAGGAACTTTGATAGGGGGATCTGACTTCAAGATTATCTACAGGCATTATGCAACTCTCTATTTTGTGTTTTGTGTGGATTCTTCTGAAAGTGAACTTGGAATTCTTGATCTCATACAGGTGTTTGTGGAAACCTTAGACAAATGTTTTGAAAATGTTTGTGAGTTGGATCTCATATTTCATATGGATAAGGTGCACTACATCTTGCAAGAAATAGTCATGGGTGGAATGGTGTTAGAAACTAATATGTCGGAGATCTTAACTCACATTGAAGCTCAGAATAAACTGGAAAAA…	Contig1242	GGGGAGGGTCATGGGTAACGTTGTGGCCGCCATCTTGAATTGGCTTGGAACTGCTTGTATTTAGTTTGTCTTTACAGCCAATTCCTCGAAATGATCAAGGCGATTCTGGTCTTCAACAACCATGGGAAACCACGTTTGACCAAGTTCTTTGCTCATTATTCAGAAGACATGCAACATCAGATTATTAGAGAGACATTTCATATTGTGTCAAGGAGAGATGACAATGTTTGTAATTTCTTAGAAGGAGGAACTTTGATAGGGGGATCTGACTTCAAGATTATCTACAGGCATTATGCAACTCTCTATTTTGTGTTTTGTGTGGATTCTTCTGAAAGTGAACTTGGAATTCTTGATCTCATACAGGTGTTTGTGGAAACCTTAGACAAATGTTTTGAAAAT…	AP-3 complex subunit sigma-1 OS=Mus musculus GN=Ap3s1 PE=1 SV=2; Accession=AP3S1_MOUSE; E-value=8.0e-72	A7S1Q2_NEMVE	A7S1Q2_NEMVE	A7S1Q2_NEMVE	0.001
SEQINDEX14673_C_c	TGACGGCCCTCAAGATTGGGAAGGCTTAGGAGAACATTGTCAAAAAGAGGGTTAATGCTAGACCGCTGTGCAAAGATCGTGAGCGGAAATTATTGCAGACATCTCTTGGAGAAGAGCTCTGAATAATTCTTCCTCAAGTTTAAGAGGAGTATCTTTGCAGTGTAACATGGCAGAAAAGGAAGTGAAGACCAGCTTTAATCACAGTCATAACTTAGAGGAATATGTATTATTAGCAAAGTCTGCACGAGGTGCAGGTGTGGTTGCCCTAATACAAAAGGCTCTGGAAGCACCAGGAGTGTATGTATTTGGAGAATTGATGGAGATGCCATCTGTTAAAGAGTTAGAAAAGTCAGAAAATTCAGGATTTTGGAATCTTTTGAACATATTTGCATTGGGGAC…	Contig3099	GGGGGTACCAATAGCGGACATGATGACGGCCTGCAAGATTGGGAAGGCTTAGGAGAACTTTGTCAAAAAGAGGGTTAATGCCAGACCGCTGTGCAAAGATCGTGAGCGGAAATTGCAGACATCTCTTGGAGAAGAGCTCTGAATAATTCTTCCTCAAGTTTAAGAGGAGTATCTTTGCAGTGTAACATGGCAGAAAAGGAAGTGAAGACCAGCTTTAATCACAGTCATAACTTAGAGGAATATGTATTATTGGCAAAGTCTGCACGAGGTGCAGGTGTGGTTGCCCTAATACAAAAGGCTCTGGAAGCACCGGGAGTGTATGTATTTGGAGAATTGATGGAGATGCCATCTGTTAAAGAGTTAGAAAAGTCAGAAAATTCAGGATTTTGGAATCTCTTG…	COP9 signalosome complex subunit 7b OS=Homo sapiens GN=COPS7B PE=1 SV=1; Accession=CSN7B_HUMAN; E-value=1.0e-29	A7SCT7_NEMVE	A7SCT7_NEMVE	NA	0.001
SEQINDEX1111_C_c	AGTCATTTGAGCCCTTTCTCTTATTGGGTGGAGAGAAAAAAATCACGATAACAAAGGACACGAAAGTTCCAAATGCAGCCCACTTCGTGGTGAACAAGGAAGACCACACACTTGGAAATCTTCTCAGGGCGCAACTGTTGCGTGATCCACAAGTTTTATTTGCTGGCTATAAAGTTCCTCATCCCCTGGAACACAAATTTGTTCTTCGTGTGCAGACCACCTCTGACTACAGTCCACAAGAGGCATTTACAAATGCTATAACAGATTTAATAAGTGAGGTGTCACTTCTAGAGGAAAGATTCAAGGCTTCTATCAGGGACAAGCAAGAGGGCTTAGAGTAATCAAGAGAGAATTTTTCATAGTTGACCTGCTTCTCCACATCCCAAGGGTTATGAAGAC…	Contig1945	GGGGATGGCCGTTTTGTAGTTCGGGAAAGGGAATTTAGGATGAATGCTCCAGAGTCATTTGAGCCCTTTCTCTTATTGGGTGGAGAGAAAAAAATCACAATAACAAAGGACACGAAAGTTCCAAATGCAGCCCACTTCGTGGTGAACAAGGAAGACCACACACTTGGAAATCTTCTCAGGGCGCAACTGTTGCGTGATCCACAAGTTTTATTTGCTGGCTATAAAGTTCCCCATCCCCTGGAACACAAATTTGTCCTTCGTGTGCAGACCACCTCTGACTACAGTCCACAAGAGGCATTTACAAATGCTATAACAGATTTAATAAGTGAGGTGTCACTTCTAGAGGAAAGATTCAAGGCTTCTATCAGGGACAAGCAAGAGGGCTTAGAGTAATCAAGA…	DNA-directed RNA polymerase II subunit RPB11 OS=Mus musculus GN=Polr2j PE=2 SV=1; Accession=RPB11_MOUSE; E-value=8.0e-47	A7SGE2_NEMVE	A7SGE2_NEMVE	NA	0.001
SEQINDEX4104_C_c	CCGCCAGCTGCTCATTATCAACTGTAGATCCAGATGTCGATGATCTTTACACCAAATACAAGCGGCTTCAAAAGCAGTTGGAATTTCTCAAGGTGCAGGAAGAGTATATCAAAGATGAACAAAAGAATCTCAAAAAGGAGTTACTTCATGCTCAAGAGGAAGTAAAAAGAATCCAGTCAGTCCCTCTTGTTATTGGTCAGTTTCTCGAAGCTGTAGATCAGAATACAGGAATTGTTGGCTCCACAACAGGTTCCAACTTTTATATTCGCATTCTCAGCACCATCGACAGGGAGTTGTTAAAGCCAAGTGCATCTGTAGCCCTTCACAAGCATTCCAATGCATTGGTAGATGTTCTTCCACCAGAAGCTGATAGCAGTATAGCAATGCTAACTGCTGATG…	Contig2873	GGGGGAAACCAAAATGGAGGAAATAGGTATCTCTGTTCAAAGTCGGGATTCAAGTCGTCCGACGACTGCCGCCAGCTGCTCATTATCAACTGTAGATCCAGATGTTGATGATCTTTACACCAAATACAAGCGGCTTCAAAAGCAGCTGGAATTTCTCAAGGTGCAGGAAGAGTACATCAAAGATGAACAAAAGAATCTCAAAAAGGAGTTACTTCATGCTCAAGAGGAAGTAAAAAGAATCCAGTCAGTCCCTCTTGTTATTGGTCAGTTTCTCGAAGCTGTAGATCAGAATACAGGAATTGTTGGCTCCACAACAGGTTCCAACTTTTATATTCGCATTCTCAGCACCATCGACAGGGAGTTGTTAAAGCCAAGTGCATCTGTAGCCCTTCACAAGCA…	26S protease regulatory subunit 6B OS=Rattus norvegicus GN=Psmc4 PE=1 SV=1; Accession=PRS6B_RAT; E-value=0.0e+00	A7RYL2_NEMVE	A7RYL2_NEMVE	A7RYL2_NEMVE	0.001
SEQINDEX4326_C_c	GTGATTTTGCGAGTGTCATTTGCCTTTCGTTGGGTTTCCATAGCGTGAAAAAAGACCTTTATCGTTCTTGTAAGAGATTGATCGGTGGATAGGCATTCCGTATAGGAGCATCCCAAATAAACGGTATTGGTTTTGTCCTTCAATGAGAGGAAAAGTGTGCAGTTTAAGGACCATTAAGAAAAATCACTTGTCGGTGTAAGATTGTTTGAAAGCAACTCTCCATGTTGAATGTAAGCTGACGACGGAAATGTAATGGTTCGGTGATCCTTTGGGCTCATCTAAATCGAAGATTTTACAATCATGAGTGGACATAGACCAAGAACAACATCGTTTGCTGAAACAAATAAGTCGCACCCGCCGTCTTTTGGAGGAGTAAAAATAAGTCGGGATAAAGATGGA…	Contig1843	CTGATATTGATGTTTGGTCTGCTGGTTGTGTGTTAGCAGAACTGCTCCTTGGTCAGCCTATCTTCCCTGGTGCCAGTAGTGTTGATCAACTGGTTGAAATAATTAAAGTTTTAGGAACTCCAACCAGGGAACAAATTAAGGAAATGAATCCTCACTACACAGAATTTAAGTTCCCACAGATTAAACCTCATCCATGGAGCAAGGTGTTCAGACCCAAGACTCCACCTGAAGCAATAAACTTGTGTAGTAGGTTACTAGAGTATACACCTTCAACAAGGCTTATACCTGTGGAGTCATGTGCTCATTGCTTCTTTGATGAACTGAGGGATCCCAACACTAAACTTCCAAATGGTCGAGATCTACCACCTCTTTTTAACTTCACACCACAAGAGCTATCTG…	Glycogen synthase kinase-3 beta OS=Homo sapiens GN=GSK3B PE=1 SV=2; Accession=GSK3B_HUMAN; E-value=0.0e+00	A7SIW0_NEMVE	A7SIW0_NEMVE	NA	0.001
SEQINDEX6465_C_c	CGGAAAACATGGCAGACAGGTGCCCACGCTGTAGAGACAGAGTGTACATGGCTGAAGAAGTGAAAGCAGGAAGACTCAAGTTCCACAAGCGGTGTTTCACATGCAATAACAAACCTTCCTGTAACAAGTCCCTGAGTAGCGGTTCATACAATGACCATGAAGGAGAGGTGTACTGCAGGGGTTGCTATGGCAAACTTTTTGGTCCCAAAGGTTATGGATTCGGAAGTGGTGCAGGGGCTCTTCATCTGACTGGAAAGTAGAATTGTACCAAATAGTGGGACTTCTCAGTCTCATGATTCCATATTTTTTCTACAACGTTTTGAAGACTTGAAAACAAAAACACAAACACTTATTTGGTTTCCTTTGGAATCGTGCTAAAATTTGTACAAGACAGGTCCA…	Contig3493	GGGGGACTACATATAAAAACGCGGTCAGTGGCACTTGTATATTTTATATCGTCAAGGAAAGTGAGCGTCGGATATACTTTTGACCAAGAAAGGAAAACATGGCAGACAGGTGCCCACGCTGTAGAGACAGAGTGTACATGGCTGAAGAAGTGAAAGCAGGAAGACTCAAGTTCCACAAGCGGTGTTTCACATGCAATAACAAACCTTCCTGTAACAAGTCCCTGAGTAGTGGTTCATACAATGACCATGAAGGAGAGGTGTACTGCAGGGGTTGCTATGGCAAACTTTTTGGTCCCAAAGGTTATGGATTCGGAAGTGGTGCAGGGGCTCTTCATCTGACTGGAAAATAGTATTGTACCAAATAGTGGGACTTCTCAGTCTCATGATTCCATATTTTTT…	Muscle LIM protein Mlp84B OS=Drosophila melanogaster GN=Mlp84B PE=1 SV=1; Accession=MLP2_DROME; E-value=1.0e-19	Q9U412_EPISC	Q9U412_EPISC	NA	0.001
SEQINDEX13230_C_c	AACGGCTTCGCGATGAAAGCTTTCGCCTTGCACATGAAACCGAAGTTCGAACACGCCAGACCCAATTGGATGTGAACAAGAAACTCGATCAGCGAATTACAGATATAAACTTCTGGAAATCGGAATTAGATCAAAAGCAGGAAGATACAGTGAATGAGATCACCATGATGCTCCAGTTTAAAGCGAGATTAGAAAGAGCTTTGGCCGATACCGAGCTTCCCCTTATGATCGCTCAACAGTGTCTCGCTAACCGTGAAAAGAGGATGAAAGTCGATCTTGTTCATGACAATGTAGAAATGCAGCTTCTGAAGGAAGTGGAGGTGATTGAGGGAGTACAGGCGCTTCTACAAAGGACACTCGAACAAGCCACCGAACAGATAAGACTTCTACGATCTGCAA…	Contig489	GGGGATAGAAGCGAGATTCCCTCATCGAGAAAGGATAGTTCCTGACATCAAGGCAAGATGGCAAGATTGGTACAACCTCCACCGAAATACACGCCAGAGGAATGGCATGCTTCGAATCATTTACAGTATTTCAACGCCGAACGCGAACGAGCGGCGGCTGAACGGCTTCGCGATGAAAGCTTTCGCCTTGCACATGAAACCGAAGTTCGAACACGCCAGACCCAATTGGATGTGAACAAGAAACTCGATCAGCGAATTACAGATATAAACTTCTGGAAATCGGAATTAGATCAAAAGCAGGAAGATACAGTGAATGAGATCACCATGATGCTCCAGTTTAAAGCAAGATTAGAAAGAGCTTTGGCCGATACCGAGCTTCCCCTTATGATCGCTCAACAG…	Tektin-1 OS=Homo sapiens GN=TEKT1 PE=2 SV=1; Accession=TEKT1_HUMAN; E-value=1.0e-107	A7SAK1_NEMVE	A7SAK1_NEMVE	A7SAK1_NEMVE	0.001
SEQINDEX9878_C_c	TGAAGGTTGACTTGGTTTGTCNGTTGCATTTTCCACTGCCAATATCTCAAACGGTTTTCAGAAAGTTGTTTTATGAATCAAAAGCAACAAAAACCTACACTCAGTGGTCAGCGGATCAGAACCCGCAAAAGAGACGAAAAAGAGAAGCAAGATCCTCTTGCATTTCGTGATGCTATAATTCAAGGACTTCAAGACATTGGAAACAATGATCTAGAACAAGTAACAGTGTTTCTTGACAAAAGTGGCAGTAAGCTGAATTACAGGCTTTACGGAGAGTATCTCTTTGATATACTGTTTGCTGGAGGTGTTTTAGCCCCTGGTGGAAGTGTACAGGAAGAAGGCGAGAAAGCCACATGGAGGACAACAGTCTGTGTGTTTGAAGCTAATGATGATGAACTC…	Contig3026	GGGGAGTGACATAAGTATTCTATCAGATACTAAACACTGAAGGTTGACTTGGTTTGTCAGTTGCATTTTCCACTGCCAATATCTCAAACGGTTTTCAGAAAGTTGTTTTATGAATCAAAAGCAACAAAAACCTACACTCAGTGGTCAGCGGATCAGAACCCGCAAAAGAGACGAAAAAGAGAAGCAAGATCCTCTTGCATTTCGTGATGCTATAATTCAAGGACTTCAAGACATTGGAAACAATGATCTAGAACAAGTGACAGTGTTTCTGGACAAAAGTGGCAGTAAGCTGAATTACAGGCTTTACGGAGAGTATCTCTTCGATATACTGTTTGCTGGAGGTGTTTTAGCCCCTGGTGGAAGTGTACAGGAAGAAGGCGAGAAAGCCACATGGAGGAC…	Basic leucine zipper and W2 domain-containing protein 1 OS=Xenopus tropicalis GN=bzw1 PE=2 SV=1; Accession=BZW1_XENTR; E-value=1.0e-138	A7S047_NEMVE	A7S047_NEMVE	A7S047_NEMVE	0.001
SEQINDEX4525_C_c	GTCGCGAGATACGAATTAGAGGAAAAATCTGGAATTGTGCTGGTTTTACAGACGGCTGCCCTTTTTAGCGTTATTTTCGCGTCACTTAGTTGTCAGGCCTCCTGCCTAAGTGTCATATCGCTCTTCACTTGGATCAAGCTGTTTGTATTCGGGTGGGAAGTGTGCAAGGAATCTTATTGACTGGAATGCCGCCATTGTAGAAGGGAAAACACATCTCTTATTTCAGGCTCGCGTTTAGCTTAGTTCTCTAAGGCATTACCGTCTTTGCTAATGACTAGCTGTTATTAATAGCATACAAACTGGATCCCTTAGACGACTTCGATACGTCCAAAATGGACGACTTCAACGACGATGGTGATGGCATTCCCGACAAGTCTTCCCATGGTAGACTTAGAAAGA…	CAOI2575.b1_c_s	GGGGTAAACCTGATAAACTCACTGTGCTGAGAATGGCAGTTAACTACATGAAATCACTGAGAGGCCCTGGCCTTACTCCTGATGTTTCGCACAAACCTTCATTTTTGTCTGATCAAGAACTCAAGCATCTTATCTTGGAGGCTGCAGATGGTTTTCTGTTTGTGGTTAATTGTACCACTGGAATTGTAGTGTATGTTTCAGACTCCATAACTCCGGTCCTAAATCAGCCACAGAGTGCGTGGATGAATCAAGAGATATTTGACTTGGTGCATCCCGAAGACACTGATAAAATACGAGATCAACTTTCTGCTACTGAATCACCAGATGCAGGGAGAGTATTGGATCTAAAAAGTGGAAGTGTGAAGAAGGACAGTCATGGAGCCTTGTCAAGGATGTACT…	Aryl hydrocarbon receptor nuclear translocator OS=Mus musculus GN=Arnt PE=1 SV=2; Accession=ARNT_MOUSE; E-value=9.0e-70	A7SFT2_NEMVE	A7SFT2_NEMVE	Q0WXX4_MESAU	0.001
SEQINDEX13274_C_c	GGGAACATTCTGTTCTCCAACATGGCGGCTAAGCTTGGACGGCTCGCAGCAAACAACACAGCTTTTTTGCTGTGTGATATCCAGGAAAAGTTTCGTCCGTCAATCAGATACTTTCCAGAGATAATCAAAGTTGCCCAAAGAATGGCAGAAGCTGCTAACATCTTGAAAATTCCAATCATCGCAACTGAGCAGTATCCCAAAGGCCTTGGCAATACTGTGGAGGAAATTGACACCAGTTCATTCAAGGAGCGGGTGTTTTCCAAGACAAAGTTTTCCATGGTCATACCTGAGGTGGAAGAACAGTTGAAGCAACTCAAAGTTGAGAACATCGTGTTGATGGGAATTGAGACGCAAGTCTGTGTGCTGCAAACTACGATGGATCTACTAGAAAAGAACTAT…	Contig498	GGGGGTTCTCCAACATGGCGGCTAAGCTTGGACGGCTCGCAGCAAACAACACAGCCTTTTTGCTGTGTGATATCCAGGAAAAGTTTCGTCCGTCAATCAGATACTTTCCAGAGATAATCAAAGTTGCCCAAAGAATGGCAGAAGCTGCTAACATCTTGAAAATTCCAATCATCGCAACTGAGCAGTATCCCAAAGGCCTTGGCAATACTGTGGAGGAAATTGACACCAGTTCATTCAAGGAGAGGGTGTTTTCCAAGACAAAGTTTTCCATGGTCATACCTGAGGTGGAAGAACAGTTGAAGCAACTCAAAGTTGAGAACATCGTGTTGATGGGAATTGAGACGCAAGTCTGTGTGCTGCAAACTACCATGGATCTACTAGAAAAGAACTATAATGTTC…	Isochorismatase domain-containing protein 2, mitochondrial OS=Xenopus laevis GN=isoc2 PE=2 SV=1; Accession=ISOC2_XENLA; E-value=3.0e-54	A7S2I8_NEMVE	A7S2I8_NEMVE	A7S2I8_NEMVE	0.001
SEQINDEX16221_C_c	AGCACGCGCGGAAAGAAAGATGGCGGATGTTCTCGATGTGGATGTGGAAGACAAAGGTGGTTTTTCTGAGGACGAAGGCGAAGAGGGAATTCAGAGATTGAAATCAGCTGTAACTAAACGCAAGGGAAGAGGCTTTAAGGGTGACTCTTCATCACATGCTAGAGATCAGTATGAGTCAATGGAAACGGATGAAGGGGGACAATCAGGCCCAGCGCGATCTGTGGAAGGATGGATCCTTTTTGTCACTAATGTTCACGAAGAAGCTCAAGAAGATGATATTCATGAATTATTTTCTGATTATGGTGAGATAAAAAACCTTCATGCCAACTTGGACAGACGGACTGGATTCTTAAAGGGTTATGCACTTGTAGAATATGAGACCTATAAAGAAGCCCAAGC…	Contig147	GGGGAAGCACGCGCGCCGGAAAGAAAGATGGCGGATGTTCTCGATGTGGATGTGGAAGACAAAGGTGGTTTTTCTGAGGACGAAGGCGAAGAGGGAATTCAGAGATTGAAATCAGCTGTAACTAAACGCAAGGGAAGAGGCTTTAAGGGTGACTCTTCATCACATGCTAGAGATCAGTATGAGTCAATGGAAACGGATGAAGGGGGACAATCAGGCCCAGCACGATCTGTGGAAGGATGGATCCTTTTTGTCACCAATGTTCACGAAGAAGCTCAAGAAGATGATATTCATGAATTATTTTCTGATTATGGTGAGATAAAAAACCTTCATGCCAACTTGGACAGACGGACTGGATTCTTAAAGGGTTATGCACTTGTAGAATATGAGACCTATAAAGAA…	RNA-binding protein 8A OS=Mus musculus GN=Rbm8a PE=2 SV=2; Accession=RBM8A_MOUSE; E-value=5.0e-48	C3ZCD9_BRAFL	C3ZCD9_BRAFL	NA	0.001
SEQINDEX8501_C_c	AAAAGAAGAACCCGATGAGCCAGAACCGGAGCAGGGTCCACCACTTCTCACACCACTCTCTGAAGATGCTGAAGTGGATAGCATGCCTCCCTGGACAGCACAGAAATCTTCCACTTTAGTTCCCCAATACGCATTAGCTGTTATGCACTCTAATCTCTGGCCAGGAGCTCATGCATTTGCTGTTGAAAGAAAATTTGAGAACATTTATGTTGGGTGGGGCCAGCGATATAGTGCTGAGAACTATAGTCCACCACCTCCTCCCCCACCTCAAGAGGAATTTCCAAGTGGGCCTGAAATAACAGAAGCTGAAGACCCATCTGTGGAGGAAGAGAAGGCTTTGAAAGCAGCACAACAAGAAGCACTTGAGGCAGCAGAAATGGAGGAAGATGAGGAGGATGA…	CCHX12290.b1_c_s	GGGCATGTGCTGACGTGTGAGGATGCCATATGAGTCAGCAATGTTGAGGGAAGGGGGAGGACGAGACTCTTTTGTGGTGAATCAAGAGTTTGAAGGACTCACGATAAATGACATGACTGATCTGTCCTGCTCAAACTGGGTGCATCATGTGCAATACATCTTACCTCAGGGTCGATGCACATGGTTCAACCCATCACAGAAAAGAGAGGAAGAAGAGCTTGAGGAAGAAGAGGATGAAGAGGAAAAAGAAGAACCCGATGAACCAGAACCGGAGCAGGGTCCACCACTTCTCACACCACTCTCTGAAGATGCTGAAGTGGATAGCATGCCTCCCTGGACAGCACAGAAATCTTCCACTTTAGTTCCCCAATACGCATTAGCTGTTATGCACTCTAATCT…	Radial spokehead-like protein 3 OS=Homo sapiens GN=RSHL3 PE=2 SV=1; Accession=RSHL3_HUMAN; E-value=6.0e-27	A7RIU6_NEMVE	A7RIU6_NEMVE	NA	0.001
SEQINDEX1856_C_c	AACAAGTCTGCCAAGGTTCGACAACAAGNTGCTGATCTGATTTCAAGAATCGCCCAGGTCATGATGACCTGTGGAGAGGAAAAGCTCATGGGTCATTTAGGTGTGGTCTTGTACGAGTACCTCGGAGAAGAGTACCCAGAAGTACTTGGAAGCATCCTGGGAGCCCTTAAGGCAATTGTAAATGTCATCGGAATGAACAAGATGACTCCACCTATCAAGGATTTACTTCCGAGGTTGACACCCATTCTTAAAAACAGGCACGAGAAAGTACAAGAGAATTGTATTGACCTCGTGGGCAGAATTGCTGACAGAGGGGCAGAACATGTGGGAGCGAGAGAATGGATGCGAATCTGTTTTGAGCTGCTTGAACTGTTGAAGGCCCACAAAAAGGCCATCAGA…	CCHX8765.b1_c_s	GGGAGCCATCAAGCACATGGCTTTAGGCGTGGCCGGATTTGGCTGCGAAGATGCGCTCACCCATCTCGTTAATTACGTGTGGCCGAACATCTTTGAAACTTCGCCTCATGTTATCAACGCTGTCATGGAATCTATCGAGGGAATGAGAGTGGCCTTAGGTCCCTCTAGGGTCCTTCATTACTGTTTGCAGGGTATGTTCCACCCCGCGCGAAAAGTTCGAGATGTGTATTGGAAGATCTACAACAGCCTGTATATTGGATCTCAGGATTCGCTAGTGGCCGCCTACCCAACAGCACCAAGCGACGAAAAGAATAATTTTGTCCGATCAGAACTCACTTATTTCCTTTGAATTCACTTGCTTTTGTTCTCGCGTACAACCATTTACTGCATTGTCACGCC…	Splicing factor 3B subunit 1 OS=Homo sapiens GN=SF3B1 PE=1 SV=2; Accession=SF3B1_HUMAN; E-value=1.0e-176	A7S041_NEMVE	A7S041_NEMVE	NA	0.001
SEQINDEX4812_C_c	AAAGGTATTTCTGCTTCAGCTTTGCCGTACCGCCGAAGTGTCCCGACGTGGCTCAAGTTGACGTCAGATGATGTTAAAGAACAAATATACAAATTAGCCAAGAAGGGCCTGACACCATCACAGATAGGTGTGATCTTGCGGGACTCACACGGAGTGGCACAAGTTCGCTATGTAACTGGAAACAAGATCCTTAGGATTCTGAAGGCGAAAGGGTTAGCGGGAAATCTTCCTGAAGATCTCTATTTCCTTATCAAGAAGGCAGTTTCTGTTCGAAAACATCTTGAAAAGCACAGGAAGGACAAGGATTCCAAGTTCAGGCTTATCCTCATTGAGAGCAGGATTCATCGCTTGGCCCGTTACTACAAGACCAAAAGACTTTTGCCTCCAAACTGGAAATAT…	Contig510	GGGGACGTGAATCCTCTTTTCTCGCCGCCATCTTGGAATATTATTGGTAACGAGTACTTGCGACAAAAACTTTCAAAATGGGTCGTATGCACGCTCCAGGGAAAGGTATTTCTGCTTCAGCTTTGCCGTACCGCCGAAGTGTCCCGACGTGGCTCAAGTTGACGTCAGACGATGTTAAAGAACAAATATATAAATTAGCCAAGAAGGGCCTGACACCATCACAGATAGGTGTGATCTTGCGGGACTCACATGGAGTGGCACAAGTTCGCTATGTAACCGGAAACAAGATCCTTAGGATTCTGAAGGCGAAAGGGTTAGCGGGAAATCTTCCTGAAGATCTCTATTTCCTTATCAAGAAGGCAGTTTCTGTTCGAAAACATCTTGAAAAGCACAGGAAGG…	40S ribosomal protein S13 OS=Rattus norvegicus GN=Rps13 PE=2 SV=2; Accession=RS13_RAT; E-value=7.0e-70	B2R549_HUMAN	B2R549_HUMAN	NA	0.001
SEQINDEX6189_C_c	CCCACAAAAGCGAGCGTTCTAGCGAGTACCAGTGCTCCAAATCCGACAGTTTCTGGCGAAAACAGCNGCGATTTGTATGACGAACGAGAAAAGATGCAGCTGTTGGTTTCTTCATTTTCAGAGGAACAGTTAAATCGCTATGAAATGTACAGGAGAGCAGCCTTTCCAAAAGCTGCCATAAAAAGGCTAATGCAAAGTGTCACAGGAGGAACCTCAATCCCTCCCAATGTTGTCATAGCAATGGCTGGTATAGCAAAAGTTTTTGTTGGAGAAGTTGTTGAGGAAGCTTGTGATACAATGGAACAATGTAAAGAAAAGGGTCCTATCCAACCCAAACACCTGAGAGAAGCCGTCAGAAAACTTAAGAGAAAAGGCCTTGTTCCAAATACACGGTATCAA…	Contig629	GGGGGAGAACAACGAAATGGAAAAAGACGCCTCTGAAAGCGGCGCTTTAAAGCGAAAACTTGAGGTTGATACAACTCTAGAAGGGTCAGAATCAGATTTGAACTCACCACCTTCAAAACTTCGCGCTACAGATGAGAAAAGAATGGACCAAGATCCCACAAAAGCGAGCGTTCTAGCGAGTACCAGTGCTCCAAATCCGACAGTTTCTGGCGAAAACAGCGGCGATTTGTATGACGAACGAGAAAAAATGCAGCTGTTGGTTTCTTCATTTTCAGAGGAACAATTAAATCGCTATGAAATGTACAGGAGAGCAGCCTTTCCAAAGGCTGCCATAAAAAGGCTAATGCAAAGTGTCACAGGAGGAACCTCAATCCCTCCCAATGTTGTCATAGCAATGGC…	Transcription initiation factor TFIID subunit 11 OS=Pongo abelii GN=TAF11 PE=2 SV=1; Accession=TAF11_PONAB; E-value=8.0e-38	A7SYY0_NEMVE	A7SYY0_NEMVE	NA	0.001
SEQINDEX4375_C_c	TCCAAGATGTCGGCAGAGTTTTATCTTCGCTATTATGTCGGACACAAAGGAAAATTCGGCCATGAGTTTCTAGAATTCGAGTTCCGTCCAGATGGAAAACTTCGGTATGCGAATAACTCAAACTACAAGAACGATGTGATGATTCGGAAAGAGGCATTTGTTCATAAAGCTGTTATGGATGAACTTAAACGCATAATTGGAGAAAGTGAGATATTGAAAGAAGATGACACTCTATGGCCTCAGCCTGATAGAGTTGGTAGACAAGAACTTGAAATTGTGATGGCTGATGAGCACATTTCATTCACAACTTCCAAGATAGGTTCTCTCATTGACGTCAACCAATGCAAAGATGCAGATGGCCTGAGGTGCTTCTATTATCTGGTTCAAGATCTTAAGTGC…	Contig2875	GGGGACGCTTTCTTTTTCCAAGATGTCAGCAGAGTTTTATCTTCGCTATTATGTCGGACACAAAGGAAAATTCGGCCATGAGTTTCTAGAATTCGAGTTCCGTCCAGATGGAAAACTTCGGTATGCGAATAACTCAAACTACAAGAACGATGTGATGATTCGGAAAGAGGCATTTGTTCATAAAGCTGTTATGGATGAACTTAAACGCATAATTGGAGAAAGTGAGATACTGAAAGAAGATGACACTCTATGGCCTCAGCCTGATAGAGTTGGTAGACAAGAACTTGAAATTGTGATGGCTGATGAGCACATTTCATTCACAACTTCCAAGATAGGTTCTCTCATTGACGTCAACCAATGCAAGGATGCAGATGGCCTGAGGTGCTTCTATTACCTGGT…	Protein mago nashi homolog OS=Gallus gallus GN=MAGOH PE=2 SV=2; Accession=MGN_CHICK; E-value=1.0e-71	A7RP78_NEMVE	A7RP78_NEMVE	NA	0.001
SEQINDEX14886_C_c	TGGCGAGAGAGTGGTCGCATGGATTGTTCAGCTGTTTCGACGACTGCGGCACTTGCTTGGTGACTTATTTCTGCCACTGTTACACTGCGGGCAAAAACGCTGAAGCTGTAGGGGATAGTTGTCTGCTGTGTGGATTAGCCACCTTTGTCCCACTTGCCAATGTGTTCTTCATGGCGCAGATCCGATCTAAGATTCGCGAGTCCAAAGGAATCAACGGTACGTTCCTCAATGACCTCTGCGCAACATGTTGCTGTCCATTGTGTATGCTGGTGCAGTCGGCCCAAGAAGTTAAAGGAGCACCAGGTGCCATGTCCATCGCTCGCTCTTAAACAAGGTGTGATACGCTGTCAAGATTAGCTTTCTTTTTTTTTGTTTTCTCGTTGAAGGACACTTTAACGA…	Contig1512	GGGGGGTCTTATTGCTTCATACAACCTTCAGACGCGTAGTCGTTCGATTTTGCTCATTCATTTTCGGATCTGTCTTTCTGACCCAACATGGCGAGAGAGTGGTCGCATGGATTGTTCAGCTGTTTCGACGACTGCGGCACTTGCTTGGTGACTTATTTCTGCCACTGTTACACTGCGGGCAAAAACGCTGAAGCTGTAGGAGATAGTTGTCTGCTGTGTGGATTAGCCACCTTTGTCCCACTTGCCAATGTGTTCTTCATGGCGCAGATCCGATCTAAGATTCGCGAGTCCAAAGGAATCAACGGTACGTTCCTCAATGACCTCTGCGCAACATGTTGCTGTCCATTGTGTATGCTGGTACAGTCGGCCCAAGAAGTTAAAGGAGCACCAGGTGCCATG…	Uncharacterized protein At1g14870 OS=Arabidopsis thaliana GN=At1g14870 PE=1 SV=1; Accession=Y1487_ARATH; E-value=3.0e-10	A7RFB0_NEMVE	A7RFB0_NEMVE	A7RFB0_NEMVE	0.001
SEQINDEX7918_C_c	GACTAAGCAGAAGATTTCGCCGACGATTTGGGAAAGATAAAGAGGAGAAGAAAGACAAAAGTGCTTTGGATTATGTGATAGTTCTACTCGATGGCAGTGACCTCTCGTTAAATTTGCATAAAAAGGCAAAGGGGCAAGAACTGCTTGATCATGTCTTTAAGAACCTTGATCTGGTTGAGAAGGATTACTTTGGACTCCAATTTATGGACACTCACCAAGTCTCACATTGGTTAGACCCCTTGAAAAAGATCAAGAAACAAGTAAGAATTGGTCCACCCTTCACTTTACACTTTAGAGTGAGGTTTTATGCTGCTGAACCACAAGATCTCAGTGAAGAACTGACAAGATATCATTTCTTCTTACAAATCAAGCAAGATATTTCCAAGGGAAA	Contig6387	GGGGGACACGAATGAGATAATTTTCACCGGTTCAGAGGCCATGCGACTTTAATTGCGAGGTGCAGGAAATAGTTGCCTGTTTTCCACGATGTATAGACTAAGCAGAAGATTTCGCCGACGATTTGGGAAAGATAAAGAGGAGAAGAAAGACAAAAGTGCTTTGGATTATGTGATAGTTCTACTCGATGGCAGTGACCTCTCGTTAAATTTGCATAAAAAGGCAAAGGGGCAAGAACTGCTTGATCATGTCTTTAAGAACCTTGATCTGGTTGAGAAGGATTACTTTGGACTCCAATTTATGGACACTCACCAAGTCTCACATTGGTTAGATCCTTTGAAAAAGATCAAGAAACAAGTAAGAATTGGTCCACCCTTCACTTTACACTTTAGAGTGAGGTT…	Band 4.1-like protein 5 OS=Rattus norvegicus GN=Epb41l5 PE=2 SV=2; Accession=E41L5_RAT; E-value=1.0e-34	A7S031_NEMVE	A7S031_NEMVE	A7S031_NEMVE	0.001
SEQINDEX14141_C_c	AAACTTTCAAAGATTTCATTATGAAAGGATTTCCTTGGACATAATTTAAGAAAAGCGCTTTGGACCAGTGCGCAGATGAGTTGAGCTTCTGTCAAAGACAACTGAATTTCCATAGAGGTTAAAAGAGGATCTTGCAGTCAGTTTCTTTTCACAGGCGCTATGGACCGAAGGGTGAAGTTTCCACACGACTTGGTATTCCACGATATGGTTAAAGATGGCGACCCGTCGGAAATGTCCAATTTTTTGAAACGGCCAAGTGTGGACACGCAAATGTTAGTGAACACCCAAGGCGGAAAAAGCAATCCAGATTTTCATCAACTTGTGAAAGATGGTAACTTAAAATGTGTGCGAATGCTTGTAACGTTAGGTGCTGATGTAAATATGCAGGACGAACAAGGG…	Contig815	GGGGGAGATGAGTTGAACTTCTGTCAAAGACAACTGAATTTCCATAGAGGTTAAAAGAGGATCTTGCAGTCAGTTTCTTTTCACAGGCGCTATGGACCGAAGGGTAAAGTTTCCACACGACTTGGTATTCCACGATATGGTTAAAGATGGCGACCCGTCGGAAATGTCCAATTTTTTGAAACGGCCAAGTGTGGACACGCAAATGTTAGTGAACACCCAAGGCGGAAAAAGCAATCCAGATTTTCATCAACTTGTGAAAGATGGTAACTTAAAATGTGTGCGAATGCTTGTAACGTTAGGTGCTGATGTAAATATGCAGGACGAACAAGGGTGTACATCGCTTCACCACAGTGTAAATGGTGGGCACATTGCGGTCACAAAGTTTCTGCTTCGAAGCGG…	Dysferlin-interacting protein 1 OS=Mus musculus GN=Dysfip1 PE=2 SV=1; Accession=DYSI1_MOUSE; E-value=8.0e-18	A7RHQ3_NEMVE	A7RHQ3_NEMVE	A7RHQ3_NEMVE	0.001
SEQINDEX9392_C_c	TTGTTCATCAAGTCTCTGGCTCTNTTTATGGCAACCAAGGCGNACATTAAACTTAACACAAAGAGGCTCTATGGTGCTGATGGGTATGCTGTAAAGGAGTTGCTTAAAGTAACATCTGTTTTGTACAGTGCCATGAAGGCAAATGCTGGAAATGAGGCTGCTGAAGAGGCAAATTTGAGCTCTTTGACATTTGATATCTCATCCAGAATAAGTGATTTAAAAGCATCTCGTCAGCTTGCATCAGAGATAACATCAAGGGGAGCTGCTCTTTATGATTTACTGGGCCACGAAGTGCAACTAAGGGAGCTTCGTATTGGTGCAATAGCCAAACCACTGGAACTTAATGAATTGGAAAATGGACTCAAGAAGAGCGTCATTTCTGTTCAGGATGACATAAAG…	Contig791	GGGGGGGGAAAAAAAATGTCGTACAGGGACTTGAGAAATTTTACAGAAATGATGAGAGCACTGGGCTACCCAAGACTCATATCCATGGAGAATTTTCGTTCTCCTAATTTTCCTTTGGTTGCTGAAGTGCTGATATGGCTTGTTCGGAGGTATGATCCAAATGCCGAATTGCCTTTAGACGTTGATACAGAACAAGATAGAGTTTTGTTCATCAAATCTCTGGCTCAGTTTATGGCAACCAAGGCGCACATTAAACTTAACACAAAGAGGCTCTATGGTGCTGATGGGTATGCTGTAAAGGAGTTGCTTAAAGTAACATCTGTTTTGTACAGTGCCATGAAGGCAAATGCTGGAAATGAGGCTGCTGAAGAGGCAAATTTGAGCTCTTTGACATTTGAT…	Clusterin-associated protein 1 OS=Rattus norvegicus GN=Cluap1 PE=2 SV=1; Accession=CLUA1_RAT; E-value=1.0e-62	A7SE98_NEMVE	A7SE98_NEMVE	NA	0.001
SEQINDEX10608_C_c	ATCAGATATTGCGGAGCAGATGGCCAGTGGTCTGNAGGCGAACCGAGTTGTATACGTGTTTTGTGCGAGGAAATTGGTCAAGTCGAACACGCCACAAGAGTCCTTACTGGTGCTAATAATGGCCAAAATGTGGCTGGTACTACTGCTACTTTCACATGCATCGCAAACTACCGAATGACGGGTGACGGTGACGCCACAAGGACATGTCAACAAGATGGAACGTGGAGTGGAACGCAACCAAGATGTGTTGCTGCCTTCTGCAGTCCAGTTCCAACCCCCTCAAATGGAGTGGTGCAAGGTTTCCGTTACGAGCTGGGTGCCACACTGCGCATCACTTGCAATGATGGTTACAATCTGGTGCCGCCCAGTTCATCATTTAGAACTTGCGTTTCCAACGGA…	CCHX8276.b1_c_s	GGGGAATTGGTGGATTGCGGTGATCCTGGGAATCCATACGGTGGTTACCGCGATATTTCGGGGGGTACCACCTTCCGATCTACTGTAACCTACACATGCAAAGCAAACCATCACCTGGAGGGAGAGGACAGTCAGACATGTCAGGGCAATGGACAATGGAGTGGATTCAAACCTGTTTGTCTCGAGCGTTCTTGCGGTAATCCAGGTGTCCCTGCGAATGGCAATAAGAATTCAACCTCCTACAAATATGGTAACTCAGTCAAATTTGAGTGCAATAGCGGCTATTCGTTGCAAGGATCTGAGGTTCGCACGTGCCAAACTAATGGATTGTGGACTGGAACGCAGCCAACATGTCAAATTGTGAACTGTGGTGACCCTGGTACACCTGCTAATGGCATC…	CUB and sushi domain-containing protein 3 OS=Homo sapiens GN=CSMD3 PE=2 SV=2; Accession=CSMD3_HUMAN; E-value=8.0e-62	A7SNM5_NEMVE	A7SNM5_NEMVE	B1AX10_MOUSE	0.001
SEQINDEX14229_C_c	GTAATTATTTTGAAAGTGTTAGGTGAAAAGAGAAGAAGGTATGGCGATGGCTGTTTTCCGACACAGTTTGCGCACCGTAGCGGAGTCTAGAGTGAATCAAATGATTGGAACTGCGGTAGCATCCTACCATAAGAATGTCATTGACCATTATGAAAATCCTAGGAATGTGGGGTCCTTGGACAAGGATGATAGCAATGTTGGAACTGGTCTTGTTGGTGCTCCAGCTTGCGGTGATGTCATGAAACTTCAGATAAGAGTCGATGAAGATGGAAAAATTGTTGACGCAAAGTTCAAGACATTTGGCTGTGGATCTGCTATTGCGTCAAGCTCCCTTGCCACAGAATGGGTAAAAGGAAAATCACTTGAGGATGCTCAAAAGGTAAAGAACCAAGAAATTGC…	Contig10	GGGGAATTATTTTGAAAGTGTTAGGTGAAAAGAGAAGAAGGTATGGCGATGGCTGTTTTCCGACACAGTTTGCGCACCGTAGCGGAGTCTAGAGTGAATCAGATGATTGGAACTGCGGTAGCATCCTACCATAAGAATGTCATTGACCATTATGAAAATCCTAGGAATGTGGGGTCCTTGGACAAGGATGATAGCAATGTTGGAACTGGTCTTGTTGGTGCTCCAGCTTGCGGTGACGTCATGAAACTTCAGATAAGAGTTGATGAAGATGGAAAAATTGTTGACGCAAAATTCAAGACATTTGGCTGTGGATCTGCTATTGCGTCAAGCTCCCTTGCCACAGAATGGGTAAAAGGAAAATCACTTGAGGATGCTCAAAAGGTAAAGAACCAAGAAATT…	Iron-sulfur cluster assembly enzyme ISCU, mitochondrial OS=Mus musculus GN=Iscu PE=1 SV=1; Accession=ISCU_MOUSE; E-value=8.0e-57	B3P1W9_DROER	B3P1W9_DROER	NA	0.001
SEQINDEX1905_C_c	CTCTCTTTATGACTGACAACAGTTCAGTAGATGCTGCAGCAAGCTGGGTTCTTGATAACCAAGACCTACCTGGCTTGGATGAGCCATTTAAGCCAGGTGAACACTTTCCAGCCCTGGAAGCCCATGCATTCGAACGGTCGTATCCTTTAGATGAAAAGACAATGAAAAGTCCTTACAAAATGGTATTTGTGGTCAACACAGAGCTTGGAATGGGTGTTGGAAAGATTGCTGCACAGGTGGGTCATGCGGCTGTGGGTCTGTACAAGGTAATGGCATCAAAACCAGGAAAATATGATTACATGGTGACACAGTGGGATGATTTTGGGGGAACAAAAATTGTCTTAAAAGGAAATAACTCAGCCCATTTGTTTGACTTGGAGGATTTGGCTCAGAAATCTC…	Contig3339	GGGGGATTGAAATCAATGAAAGAAGCTTTGACAACATGGTGGACGCGAACGAGGATTTTGCTACGAGCTGTGTAAGCGGTCCAACAGAAAATGCTGACGAAAGGTTGCCTCGTGTAAGACGAAGATCGCAATGGGAAGGGCCAAACGAAGAGTTTCTTCAATTGCTGATGGATTTAGGAATATCGAAAAACGCGGCAGAAAAGGCTCTCTTTATGACTGACAACAGTTCAGTAGATGCTGCAGCAAGCTGGGTTCTTGATAACCAAGACCTGCCTGGCTTGGATGAGCCATTTAAGCCAGGTGAACACTTTCCAGCCCTGGAAGCCCATGCATTCGAACGGTCGTATCCTTTAGATGAAAAGACAATGAAAAGTCCTTACAAAATGGTATTTGTGGTCA…	Probable peptidyl-tRNA hydrolase 2 OS=Caenorhabditis elegans GN=C24G6.8 PE=2 SV=1; Accession=PTH2_CAEEL; E-value=9.0e-23	A7SR90_NEMVE	A7SR90_NEMVE	NA	0.001
SEQINDEX11093_C_c	AAGATATCTTCTGCATCCTCGTAACGCTGGTTATGTTCTGAGGTTTGCAGCGCAATCTTCTTTAATCTCCCCTGTATTGCTGTTCTTGACGTTGCTGTTGATTTTATCAAGCTCTTTAGTAACAGTCCTCTTCGGCTAGAGGCTGATTGTTTGAATAGCTTTTAAATTTGAAACGAAAGTTGACGTGTTGTCGATTCGCAGATGACACCAGCAGTGGAGAATCCTCCGGCCGAAGAAGAGGCAAGTAAAGTTGTCTCTGGAACTGAGAGCGACAGTGATGACGAATTACCGGAATTAGAAGAAGGAGATTCTGGACAACCGAGCATATCAAGCGAGCTAGCTACTGCAGCTGGTCTAACTGATCAAGAAATAGGCAGCAAAGCCAAACAAAGTCGCAGC…	Contig1990	GGGGGACCCTCGCAACGGTGGTCCTGTGCGGAGGTTCACAGCGCAATCTTCTTTAATCTCACCCTGTATTGCTCTTCTTGACGTTGCTGTTGATTTTATCAAGCTCTTTAGTAACAGTTCTCTTCGGCTAGAGGCTGATTGTTTGAATAGCTTTTAAATTTGAAACGAAATTTGACGTGTTGTCGATTCGCAGATGACACCAGCAGTGGAGAATCCTCCAGCCGAAGAAGAGGCAAGTAAAGTTGTCTCTGGAACTGAGAGCGACAGTGATGACGAATTACCGGAATTAGAAGAAGGAGATTCTGGACAACCGAGCATATCAAGCGAGCTAGCTACTGCAGCTGGTCTAACTGATCAAGAAATAGGCAGCAAAGCCAAACAAAGTCGCAGCGAAAAAAA…	Nascent polypeptide-associated complex subunit alpha OS=Oreochromis niloticus GN=naca PE=2 SV=1; Accession=NACA_ORENI; E-value=6.0e-49	A7RRQ8_NEMVE	A7RRQ8_NEMVE	A7RRQ8_NEMVE	0.001
SEQINDEX3472_C_c	GCGCAAGTTTGCAACTTGTTTTCGAATAGCATTAGGTAATCGAACCGCTCGTTCAAGAAAGTAAGGCATAATAATGGAATCAGCGGCTCAAAATGTCCATCCAAAACCAGCTAAAGCTGTCAAGCAGTCTGTGGATAAGGAAATAGGCGATGATTACGTAAAAAAACGAGAGAGAAATAACATCGCTGTGCGGAAAAGTCGAATGAAGGCAAAGGAACGAATTGAAGAAACAAGAAGAAGGGTTGTTGATTTATCGAAAGAAAACGAAGAATTACGGAACAAGGTTTCTTTGCTTCAAAAGGAGTTGAACGTTTTGAGGTCTCTGTTCGCTAATGGTGGAATAAGTGTTCCTGCAGAAATCGACCTTCAATTTACGAACTGCAACAATGATAATCACGG…	Contig2250	GGGGGCGCAAGTTTGCAACTTGTTTTCGAATAGCATTAGGTAATCGAACCGCTCGTTCAAGAACGTAAGGCATAATAATGGAATCAGCGGCTCAAAATGTCCATCCAAAACCAGCTAAAGCTGTCGAGCAGTCTTTGGATAAGGAAATAGGCGATGATTACGTAAAAAAAACGAGAGAGAAATAACATCGCTGTGCGGAAAAGTCGAATGAAGGCAAAGGAACGAATTGAAGAAACAAGAAGAAGGGTTGTTGATTTATCGAAAGAAAACGAAGAATTACGGAACAAGGTTTCGTTGCTTCAAAAGGAGTTGAACGTTTTGAGGTCTCTGTTCGCTAATGGTGGAATAAGTGTTCCTGCAGAAATCGACCTTCAATTTACGAACTGCAACAATGATAAT…	CCAAT/enhancer-binding protein beta OS=Rattus norvegicus GN=Cebpb PE=2 SV=1; Accession=CEBPB_RAT; E-value=1.0e-13	A7SDE7_NEMVE	A7SDE7_NEMVE	A7SDE7_NEMVE	0.001
SEQINDEX468_C_c	ACACGTGAGGGAAGCAAGATGGCGGACAAATTCACTGAGTTTGCAGGACGAATGGGAAAGGCTCCTAAAGGAGTTGGAACAGGGCTTAAACTTCTAGCTGCCGCAGCAGCGGTGGCTTATGGAGTCAAAGAGTCGATTTACACAGTTGATGGTGGTCACAGGGCCATAATTTTTAGCAGAATTGGTGGAATCCAAAACAATATTTACACTGAAGGACTCCACTTCAGGATACCGTGGTTTCAATATCCCATAATTTATGACATCAGATCAAAGCCAAGGAAGATTGTTTCTCCAACTGGAAGCAAAGATTTGCAGATGGTCAACATTGGTCTTCGAGTGCTTGCTCGTCCACAGGCCACCATGCTGCCTGAGATGTTTCGGAGGCTTGGACTTGACTTT…	Contig1533	GGGGAGACTTCGGCACACGTGAGGGAAGCAAGATGGCGGACAAATTCACTGAGTTTGCAGGACGAATGGGAAAGGCTCCTAAAGGAGTTGGAACAGGGCTTAAACTTCTAGCTGCCGCAGCAGCGGTGGCTTATGGAGTCAAAGAGTCGATTTACACAGTTGATGGTGGTCACAGGGCCATAATTTTTAGCAGAATTGGTGGAATCCAAAACAATATTTACACTGAAGGACTCCACTTCAGGATACCGTGGTTTCAATATCCCATAATTTATGACATCAGATCAAAGCCAAGGAAGATTGTTTCTCCAACTGGAAGCAAAGATTTGCAGATGGTCAACATTGGTCTTCGAGTGCTGGCTCGTCCACAGGCCACCATGCTGCCTGAGATGTTTCGGAGGC…	Prohibitin-2 OS=Xenopus tropicalis GN=phb2 PE=2 SV=1; Accession=PHB2_XENTR; E-value=1.0e-103	A7S1L7_NEMVE	A7S1L7_NEMVE	A7S1L7_NEMVE	0.001
SEQINDEX10373_C_c	AGTTCTGAGCTACCACCAACGGGAAGGAAAAAAAAGAAAAACAAAATAAAATCCACTGAACGAGGAGGATGATCCGACAAGAGGACAACAGACTCACAAAGTTATTCGTCGGAGGGATTCCTTACGATACAGATGACGACTCTTTGAGAGAATTTTTTATCCAGTATGGTGAGATCAAAGAGGCAGTTGTCATTCGAGACAGAGATACACTTAAATCCAAGGGTTACGGATTTGTTACCTTTTTTGATAAAGATTGCGCAGAGAAAGCGTGTGTAAACAGAAGACCGGTAATCGACGGAAGAACAGCAAACGTAAATTTAGCCTACATTGGCGCCAAACCAAAACCGACGAAAGGAACTGGAAAGTACGCCGCGATGACTAGTAATGGACTTGCATATA…	Contig3822	GGGGGTATGAAACTTGTGCATTACACAAACATTCATGTTGTAGGAATCATCAGACTCGCTGCTTGATTTTCACATCAAATCAGATTGTCAATAGGGATTTAACAACTGTTAATTAGCTTGGTTTTGGACACTCTATCAATCAAGTGTCCCTGTGGACCATTTGCAAGAAGAAAAGTAAGGCTATGCGCAAGTAGCTATTGGCTGGCCACTTAAGCCGCTAATGCTGACCCAGGAGACTTGATATCTCAAGCGTTGCTAGCCCCGGTTGTTCTGGAAACAAAGGTTAGTTCTGAGCTACCACCAACGGGAAGGAAAAAGAGAAAAACAAAATAAAATCCACTGAACGAGGAGGATGATCCGACAAGAGGACAACAGACTCACAAAGTTATTCGTCGGAGG…	RNA-binding protein 24 OS=Danio rerio GN=rbm24 PE=2 SV=1; Accession=RBM24_DANRE; E-value=2.0e-24	A7S851_NEMVE	A7S851_NEMVE	A7S851_NEMVE	0.001
SEQINDEX4835_C_c	TGGCATTTTCAAAGATGCGAGAATACAAGCTTGTCGTTCTTGGATCTGGTGGTGTAGGAAAGAGTGCTTTGACAGTCCAGTTTGTTCAGGGAATCTTCGTGGAGAAATACGATCCAACCATTGAAGACTCTTACCGAAAGCAAGTTGAAGTTGACGGACAGCAGTGTATGCTGGAGATACTGGATACAGCAGGAACGGAACAATTTACAGCCATGCGAGATCTTTACATGAAGAATGGACAGGGTTTTGTGCTAGTGTATTCCATCACAGCACAGTCAACATTCAATGACCTGCATGATTTGAGGGATCAGATCTTAAGAGTAAAGGACACAAGTGATGTACCAATGGTCCTTGTTGGAAATAAGTGTGATTTAGAAGATGAGCGAGTTGTGGGAAAAG…	CCHX5750.b1_c_s	GGGGACACACCCGTATTGTAGTGAGGAGGGAGCGTCGCGTTTGTTTGTCGGATTTTATTTCTTTCTGTCGAAAATCAGCCTCTTTTCTGGCATTTCAAAGATGCGAGAATACAAGCTTGTCGTTCTTGGATCTGGTGGTGTAGGAAAGAGTGCTTTGACAGTCCAGTTTGTTCAGGGAATCTTCGTGGAGAAATACGATCCAACCATTGAAGACTCTTACCGAAAGCAAGTTGAAGTTGACGGACAGCAGTGTATGCTGGAGATACTGGATACAGCAGGAACGGAACAATTTACAGCCATGCGAGATCTTTACATGAAGAATGGACAGGGTTTTGTGCTAGTGTATTCCATCACAGCACAGTCTACATTCAATGACCTGCATGATTTGAGGGATCAGAT…	Ras-related protein Rap-1A OS=Rattus norvegicus GN=Rap1a PE=1 SV=1; Accession=RAP1A_RAT; E-value=2.0e-81	A7SB93_NEMVE	A7SB93_NEMVE	A7SB93_NEMVE	0.001
SEQINDEX7602_C_c	TCACAAGATTGGCCAGTTAGTGCTGAGGTAGATCTTGATGACATGGAATATCATGAAGCCATGCAGACTTACTCTAGCGATTGTCGCTGTGATGGTGAATATATCATTTCTGAAGGTGATTTAGAAAATGGACAAAATATAGTGTGTTGTTCAGGCTGCTCGTTGAGTATCAGAGTGCTGTACAATATGCTATCCGACGAAGAGGCTTAGAGCGAAGATGATGGAGTTGGTGGCATCGATAATTGCTGCTGATGTCTAACCCTGAATATATAAATGCGTCATGCTTAAGCCGGGTTCAAAGTTTGTGTCATTAGAGAGCTTTAGATCCGAGAGTACCGAGTACGAGTTTGTTTGCTTGATCATAGAATGCATGCCTAGTTTTCCGTGACATGTAACGCC…	Contig4116	GGGGGTAAGCATATATTGCTCAAGATGGCGAGTGCTCATGGCAAGCGATAAAGCTGTTGAAACGAAGGAAGTCACGAGCCCTTACAGCGTGCTTGGCGTTTCGGAAAACTCTAGCTATGAAGAAATCAAACGAGCTTACCAAAAGCTTCTTCTCAAGTTTCATCCTGACAAGCTTGATGAATCATTAAGCCAGAAAGATCGTGAGCAAGCTTGTGAAAGATTTTTATCTGTTGATCAGGCATGGAAACTTCTGAATGACCAAAGTTCCAAAGCTAAATGTGACAGAAACTTAAAAGAGCAGAAATTATCACAAGATTGGCCAGTTAGTGCTGAGGTAGATCTTGATGACATGGAATATCATGAAGCCATGCAGACTTACTCTAGCGATTGTCGCTGTGA…	DPH4 homolog OS=Dictyostelium discoideum GN=dph4 PE=3 SV=1; Accession=DPH4_DICDI; E-value=9.0e-14	A7SYK2_NEMVE	A7SYK2_NEMVE	NA	0.001
SEQINDEX15335_C_c	TCGCTGCGTAGGAAGTTGTGGTGTGATTTATCGGTCAGCTGTCTGAGTTTGGGGAGCTTCGGTTTATCCAACATGGGGAACTGTCTAAAAAGCTCCGGACAGGATGATATTTCGCTGTTACACGGCGACGAAAGCCCCGATTCACCAAGAGCTGGTGAACCGCCACCGCCATATCAGGAAGAAGCTCCTATCTTTATTCAAAGCCAACATGCTCCGCATTTACTTTCCGAAGATCAGCAGATTCGCTTGGCACAACGTTTAGGACTTATTCAACATCTTCCAGTAGGAAAGTACGATGGTTCGAAAGGAAAGAAACGAGAGTGTGTTATATGTATGACTGATTTTTGCATGGGGGATCCAATTCGCTTTCTTCCTTGCATGCACATTTACCACAAAGAC…	CCHX5163.b1_c_s	GGGGGGAGAATAATTTTTTTTGAGAGCGGACAAACTACTGTGGCTGCGTAGGAAGTTGTGGTGTGATTTATCGGTCAGCTGTCTGAGTTTAGGGAGCTTCGGTTTATCCAACATGGGGAACTGTCTAAAAAGCTCCGGACAGGATGATATTTCGCTGTTACACGGCGACGAAAGCCCCGATTCACCAAGAGCTGGTGAACCACCACCGCCATATCAGGAAGAAGCTCCTATCTTTATTCAAAGTCAACATGCTCCGCATTTACTTTCCGAAGATCAGCAGATTCGCTTGGCACAACGTTTAGGACTTATTCAACATCTTCCAGTAGGAAAGTACGATGGTTCGAAAGGAAAGAAACGAGAGTGTGTTATATGTATGACTGATTTTTGCATGGGTGATCC…	RING finger protein 11 OS=Mus musculus GN=Rnf11 PE=1 SV=1; Accession=RNF11_MOUSE; E-value=1.0e-45	A7S6T4_NEMVE	A7S6T4_NEMVE	NA	0.001
SEQINDEX5887_C_c	TAAGAATCTACTGCTGTCAAGTCAGGAGACTCACACCGGTCACAAAGGATTCATATGTGTTGGTACAACACATGTGTATGGGGAAGACATCACTTGCAGAGGACGAATTTTAATTTTTGATATTATTGAAGTTGTTCCTGAACCAGGTCAGCCACTGACCAAGAATAAATTTAAGATGCTGTATGGAAAAGAACAAAAAGGTCCTGTCAGTGCTCTAACAGAAGTCAATGGCTACCTTGTCAGTGCCATAGGACAGAAGATCTACATCTGGAGTTTCAAAGACAATAATGATTTGGTGGGCATGGCATTCATTGATTCACAAATGTACATCCATTCACTGGTCTCCATCAAGAACCTGATTATTGCAGCAGATTTNNNNNNNNNNNNATGTTATTGATG…	CCHX12337.b1_c_s	GGGCTGGGAGATTATACCGAGTACACGTATTGAAATGGAAGATTGGGAACATGTGACTACATGTAAGAATCTACTGCTGTCAAGTCAGGAGACTCACACTGGCCACAAAGGATTCATATGTGTTGGTACAACACATGTGTATGGGGAAGACATCACTTGCAGAGGACGAATTTTAATTTTTGATATTATTGAAGTTGTTCCTGAACCAGGTCAGCCACTGACCAAGAATAAATTTAAGATGCTGTATGGAAAAGAACAAAAAGGTCCTGTCAGTGCTCTAACAGAGGTCAATGGCTACCTTGTCAGTGCCATAGGACAGAAGATCTACATCTGGAGTTTCAAAGACAATAATGATTTGGTGGGCATGGCATTCATTGATTCACAAATGTACATCCATTC…	Cleavage and polyadenylation specificity factor subunit 1 OS=Bos taurus GN=CPSF1 PE=1 SV=1; Accession=CPSF1_BOVIN; E-value=3.0e-60	A7SP44_NEMVE	A7SP44_NEMVE	NA	0.001
SEQINDEX1208_C_c	ATCAAGGAAAAGTCCTTTGTTTGAACTGGGCCCAGGACAAGCGGCACGTGGTCAGCAGCTCTCAGGATGGCAAAGTTATTGTTTGGGATGCTTTCACGACAAACAAGGAGCACGCAATATCTATGCCCACAACATGGGTCATGGCCTGTGCTTATTCTCCATCTGGTCATCTGGTAGCTTGTGGGGGACTTGACAATAAGTGTTCTCTTTTCAAACTGAGTTTTGATGATGACTGTGCGACCAAAAAACACACTGTTGCCCTGCACACCAGCTACATGGCTTGCTGTACATTTACCTGCTCCGATCAACAAATCCTAACTGGAAGTGGAGACACTACTTGTGCATTATGGGATGTGGAATCAGGACAGCTTCTTCAACATTTTCATGGTCATACATCTG…	CCHX1675.b1_c_s	GGGGATGCGTAAAGTATGGCGGCCAGCTCCTCGGAAGAGTCGCTTTCTTCTCTGTGCAAAGAAGCGGAGCAGCTGAAAGTAAAAATTGACGAGGAAAAGAAGAAGTGCTGCGATACACAGTTGAAAGAGATTGCTCAAAAAACAGAAAGACTTTCTCTATCACCACTGAAAGTGCGAAGGATCCTGAAGGGCCATCAAGGAAAAGTCCTTTGTTTGAACTGGGCCCAGGACAAACGGCACGTGGTCAGCAGCTCTCAGGATGGCAAAGTTATTGTTTGGGATGCTTTCACGACAAACAAGGAGCACGCAATATCTATGCCCACAACATGGGTCATGGCCTGTGCTTATTCTCCATCTGGTCATCTGGTAGCTTGTGGGGGACTTGACAATAAGTGTTCT…	Guanine nucleotide-binding protein subunit beta-5 OS=Tamias striatus GN=GNB5 PE=2 SV=1; Accession=GBB5_TAMST; E-value=1.0e-126	A7SF63_NEMVE	A7SF63_NEMVE	A7SF63_NEMVE	0.001
SEQINDEX4799_C_c	ATCAGGAAAGAGGAAAGAAATTTACAAATACGACGCGCCATGGACGATATATGGAATGAACTGGAGCGTTCGCCCGGACAAACGCTTTCGACTTGCCCTAGGAAGCTTTGTGGAAGAATATAACAACAAGGTGCAGATTATTTATCTTGATGAAGATAAGTCTGAATTTGTTGTGAGAGCAACGTTTGAACACCCATATCCTACGACAAAAATTATCTGGATCCCAGACAATAAAGGTGTGTATCCTGATCTTGTTGCAACATCAGGCGACTACTTGAGGGTATGGAGAGTGAGTGACTCTGATGTACGCCTGGAATGTCTCCTCAATAATAATAAAAACTCAGATTTCTGTGCTCCATTGACATCATTTGACTGGAATGAGGTTGATCCAAATCTGCT…	CCHX7135.b1_c_s	GGGTGGATCCCGGACAATAAAGGTGTGTATCCTGATCTTGTTGCAACATCAGGCGACTACTTGAGGGTATGGAGAGTGAGTGACTCTGATGTACGCCTGGAATGTCTCCTCAATAATAATAAAAACTCAGATTTCTGTGCTCCATTGACATCATTTGACTGGAATGAGGTTGATCCAAATCTGCTTGGAACGTCAAGCATCGATACAACATGTACTATCTGGGGACTTGAGACAGGTCAAGTTGTTGGTAGAGTCAACATAGTATCAGGTCATGTGAAAACACAGCTTATTGCTCACGACAAGGAAGTGTATGACATAGCATTCAGTCGTGCTGGAGGAGGTAGAGACATGTTTGCTTCTGTTGGAGCTGATGGCTCTGTTAGAATGTTTGATCTCAGG…	WD repeat-containing protein 68 OS=Mus musculus GN=Wdr68 PE=2 SV=1; Accession=WDR68_MOUSE; E-value=0.0e+00	A7RU89_NEMVE	A7RU89_NEMVE	NA	0.001
SEQINDEX3776_C_c	AATTAAACTCGAACATATCACAAAAACATTGCGAAAGCAACATGGCACCTAAAGTAGCAGGCAAGAAGGGTGAGAAACGAGCCGGCAAAGCGAAGGTTTCAAGCGAGGGTAAAACGAAGAGAAGTCGCAAACGAAAGGAAAGCTACGCAATCTACATTTATAAAGTGTTGAAGCAAGTACACCCGGACACTGGTATATCAAGTAAAGCCATGGGAATTATGAACTCATTTGTTAATGACATCTTTGAACGAATCGCTTCAGAAGCTTCGAAGCTTGCTCATTACAACAAGAAATCGACAATCAGTTCTCGAGAAATACAGACCGCCATAAGGCTGCTTTTACCGGGGGAACTGGCGAAACATGCTGTCAGTGAAGGAACTAAAGCTGTGACCAAGTACA…	Contig1646	GGGAGGGAGAAATCCGAGGAGTCCTCAAAGTTTTCGTTGAAAATGTCGTCTGTGTCAGTGTAACCTACACGGAACACGCCAAGGAAAGTCCGAACGGCAAAAGACGTAGTCTATGCCAAGGCTAACGGCTCCTTTCGGAGCCAACAATTGACGGTAGAGCGATAACCAACCCTCCGAGGTATTCTACCATTAATGACTTGGCTCGAGAAATGCTAATCGTGTCTTCATAATGTATTATGAATCGCTGTAAGACCACGAGCAGTGAATCGTGACTTGTCATTCGCGTTTCGTCATTGCTTATTCCTACAACGCACCAATAGTTTTGGTGTATTTTCAATCCGCATACTAATTGATCCTTGTGCTTACGACAAATAAATACAGGCGAGAACCACCTTATTC…	Histone H2B.3 OS=Tigriopus californicus PE=3 SV=2; Accession=H2B3_TIGCA; E-value=2.0e-46	A7RJP4_NEMVE	A7RJP4_NEMVE	A7RJP4_NEMVE	0.001
SEQINDEX5082_C_c	TGGTGAGGTGTTGTTGGATTTAAGATTTTTTCAGTCGTATTATGGCTCGAACGAAGCAAACGGCACGTAAATCTACCGGAGGAAAGGCTCCAAGAAAACAGCTAGCAACCAAAGCAGCTCGTAAAAGTGCGCCGTCTACTGGTGGCGTGAAGAAGCCTCATCGTTACAGGCCGGGAACCGTCGCTTTGAGAGAAATTCGTCGTTATCAGAAGTCAACGGAATTGTTGATCAGAAAGCTCCCTTTTCAGCGTCTTGTTCGTGAAATCGCCCAAGACTTCAAAACTGATCTTCGATTCCAAAGTGCAGCCATCGGTGCCCTTCAAGAAGCCGCTGAAGCTTACTTGGTTGGTCTCTTCGAAGACACAAACTTGTGTGCTATCCACGCGAAACGCGTAACAA…	Contig1396	GGGGGGCCAGTGTTAATTTTAAAGTGGATCGTTGGTGGTGAGGTTTAGTTGGAGTTAAGATTTTTTCAGTCGTATTATGGCTCGAACGAAGCAAACGGCACGTAAATCTACCGGAGGAAAGGCTCCAAGAAAACAGCTAGCGACCAAAGCAGCTCGTAAAAGTGCGCCGTCGACTGGTGGCGTGAAGAAGCCTCATCGTTATAGGCCGGGAACCGTCGCTTTGAGAGAAATTCGTCGTTACCAGAAGTCAACGGAATTGTTGATCAGAAAGCTCCCTTTTCAGCGTCTTGTTCGTGAAATCGCCCAAGACTTCAAAACTGATCTTCGATTCCAAAGTGCAGCCATCGGTGCCCTTCAAGAAGCCGCTGAAGCTTACTTGGTTGGTCTCTTCGAAGACAC…	Histone H3.3 OS=Xenopus tropicalis GN=TGas113e22.1 PE=2 SV=3; Accession=H33_XENTR; E-value=2.0e-63	Q4S9G0_TETNG	Q4S9G0_TETNG	Q4S9G0_TETNG	0.001
SEQINDEX21044_C_c	CGGAAGCCGGCTTCAGACCTCATATAGACCAAGAGAATTCCCAAGTGAAAAACATGAAAGGGGAAACAGGCAGAAGCTTTGTTGCTGCAAAATCTTTTCAATCGAGCAATGCACCTTTAACCACCCCTAGACGGGTTCTTGGAGATGTTGGAAACACAATTCAAACAGGGACCACTAAAGGCAGAAAAGGGTTGGCTTTGAAGTCAAACAAACCATGTGGAAAGACACCCTTGGCATCCAAAATTTTTCAAGATCACACAGGAACTCCCAGCACCAAAGGACAGTCACTTTTACACCAGATTAGTTCTGCGGGTCTCAAACAAAGTAATAAACAGAAGGTCACGTCACACATCAAAACAAAAACCAAACTAAAAGTAAAATCACAAGAGCCCAGCCAAA…	Contig1919	GGGGACTCTCTGCATTTTAGTTTTAGTCGGTCTCTCCGAGAAGCAGAAAATTTCAAACATTTACACGAACCAAGAACTAATGGCGACGGAAGCCGGCTTCAGACCTCATATAGACCAAGAGAATTCCCAAGTGAAAAACATGAAAGGGGAAACAGGTAGAAGCTTTGTTGCTGCAAAATCTTTTCAATCCAGCAATGCACCTTTAACCACCCCTAGACGGGTTCTTGGAGATGTTGGAAACACAATTCAAACAGGGACCACTAAAGGCAGAAAAGGGTTGGCTTTGAAGTCAAACAAACCATGTGGAAAGACACCCTTGGCATCTAAAATTTTTCAAGATCACACAGGAACTCCCAGCACCAAAGGACAGTCACTTTTACACCAGATTAGTTCTGCAGG…	NA	A7RS36_NEMVE	A7RS36_NEMVE	NA	0.001
SEQINDEX1719_C_c	TTGAGGCCAAGTCACGTCTACAATCAAGGTACCCTCCATCGCTTATCACATTCCCTAAAAGTTCTGCAAAAAGCTAGTCCACAGAAACTTAGAGATGATTGGGGAGCAGCTTCCTTTGATGTTTCCAGCATGACAAAACTGTTAGACCATGACAATCATGAGAAGAAGGAGAAGTTCAGAAAAATTTTATCAGAGGACCCTCTTATGAAGCCTAAGTACAACATCTCTGTCGACGAGGAGAGAGAATTAGCTCTGAGAAGGCTAAAGAAACTCTGTGAACAAGGATTCATCTCTGTGCTGGACTTTCGTCATAATCCATTATGGATATTTGCTGCACACGAGCTTGGTGCTGTAGTTGATGGTTCAATGGCAGTGAAGATGACAGTACAATTTAACTTG…	Contig4638	GGGGAAGGTATTCATGGAGTCTTGGTACCCATTCGCGACAAAAATCTTCAAGAAGTTCCAGGGTCTCATATTCATGACATGGGTCATAAGATTGGTCTGAATGGAGTTGACAATGCTAAGTTTATCTTTGAAAATGTGCGAGTACCAAGAGAGAACCTGCTAAACCTGTATTCTGATGTGGATGAAGGTGGGAACTATACAACAAAAGTGGACGGAAATGTGCGAAAGAGGTTCTTGACTGTTGCCGATCAGTTGCTGTCTGGTCGTATCTGTATCGCAAGCATGTCACAGGGTGTTTCGAAGGCATGCGTAACTATTGCTATCCGCTACTCAGCCACTCGTTTGAGTGTGGGACCTGATGGCAAGTCCGATACACCAATTCTGAAGTACCAGCTTCAG…	Acyl-coenzyme A oxidase 2, peroxisomal OS=Arabidopsis thaliana GN=ACX2 PE=1 SV=2; Accession=ACOX2_ARATH; E-value=2.0e-73	A7RLE0_NEMVE	A7RLE0_NEMVE	A7RLE0_NEMVE	0.001
SEQINDEX5912_C_c	AAAATTTACTCTAATTATGAGCGCAGAAATAGATGCCCACATCTCGAAGAAATATGAAATCAAGAAGCGTTTAGGAAAAGGGGCGTATGGAATTGTCTGGAAAGCGATAGATCGACGCACAGGAGAAGTTGTTGCTGTAAAAAAGATTTTTGATGCCTTTCGAAATCAAACGGACGCACAGAGAACGTTTCGAGAGATCTGTTTTCTACAGGAGTTTGGGACCCACGAAAACGTTATAAAACTTTTGAATGTGATAAAGGCAGACAATGATAAAGATATTTACTTGGTTTTCGAGTATATGGACACAGATCTACATAATGTAATAAAGAAAGGCAACATTCTTAAAGATATACACAAAAGATACATTATGTACCAGATATTAAAAGCGGCTATGTATTT…	Contig6223	GGGGTGAATTGTACTGTGTGGTGGGACAAAATTTACTCTAATTATGAGCGCAGAAATAGATGCCCACATCTCGAAGAAATATGAAATTAAGAAGCGTTTAGGAAAAGGGGCATATGGAATTGTCTGGAAGGCGATAGATCGACGCACAGGAGAAGTTGTTGCTGTAAAAAAGATTTTTGATGCCTTTCGAAATCAAACGGACGCACAGAGAACGTTTCGAGAGATTTGTTTTCTACAGGAGTTTGGGACCCACGAAAACGTTATAAAACTTTTGAATGTGATAAAGGCAGACAATGATAAAGATATTTACTTGGTTTTCGAGTATATGGACACAGATCTACATAATGTAATAAAGAAAGGCAACATTCTTAAAGATATACACAAAAGATACATTATGTA…	Putative serine/threonine-protein kinase C05D10.2 OS=Caenorhabditis elegans GN=C05D10.2 PE=2 SV=2; Accession=YPC2_CAEEL; E-value=1.0e-129	A7SA30_NEMVE	A7SA30_NEMVE	A7SA30_NEMVE	0.001
SEQINDEX4822_C_c	CGTTGCTGTTAATGTAACGTGTCTTCGGTTGTGGAAACGTCTAACAGAATCCGATCAATCTTCTCTGTTAGTGATCTTTCTTCCCGCTGAAACCAGCTACAAAGAGTCGCAGATATTTATTCGATCCGAAAATGTCCATAGGTGTACCCATTAAGATTTTACACGAGGCTGAGGGACACATTGTCACACTCGAAACTCTGACTGGTGAAGTTTACAGAGGGAAACTTGTGGAGGCAGAGGACAACATGAATTGCCAGATGTCAAACATTACTGTTACTGCAAGAGACGGCCGAGTGTCTCAATTAGAACAAGTATTTATTCGTGGAAGTAAAATCCGGTTCTTAATTCTCCCGGACATGTTGAAAAACGCTCCCATGTTTAAGAAAATGACTCAGAAAG…	Contig1494	GGGGCCCACTAACGTTTAGCAACGTTGCTGCTAATGTAACGTGTCTTCGGTTGTGGAAACGTCAAACAGAATCCGATCAATCTTCTCTGTTAGTGATCTTTCTTCCCGCTGAAACCAGCTACAAAGAGTCGCAGATATTTATTCGATCCGAAAATGTCCATAGGTGTACCCATTAAGATTTTACACGAGGCTGAGGGACACATTGTCACACTCGAAACTCTGACTGGTGAGGTTTACAGAGGTAAACTTGTGGAGGCAGAGGACAACATGAATTGCCAGATGTCAAACATTACTGTTACTGCAAGAGACGGCCGAGTGTCTCAATTAGAACAAGTATTTATTCGTGGAAGTAAAATCCGGTTCTTAATTCTCCCGGACATGTTGAAAAACGCTCCCATG…	Small nuclear ribonucleoprotein Sm D3 OS=Xenopus laevis GN=snrpd3 PE=2 SV=1; Accession=SMD3_XENLA; E-value=1.0e-37	A7RM92_NEMVE	A7RM92_NEMVE	NA	0.001
SEQINDEX4752_C_c	GCATGAGCGCTGTTGACGAAGCTTCTCTTTTTTCTAAGGAAATTACTTTCTTTTTGTTGGACAAAAATGGCTGCAACTCTACGTCCTTACCTTAATGCGGTTCGTTCAACTCTAACAGCATCCATGTGCTTGGAAAACTTTGATTCTCAAGTCGTGGAAAGGCATAACAAACCAGAAGTGGAGGTCCGCAGCGGCAAGGAGTTACTGCTAACACCAGTCGTTATAAGCCGAAACGAGAGAGAGAAAGTTCTTATTGAAGGTTCCATCAATTCCCTCAGGATAAGCATCGCAGTAAAGCAGGCTGACGAGATAGAGAAGATTCTTTGCAAGAAATTCATGCGTTTTATGATGATGCGGGCCGAACATTTTGTGATTCTCCGAAGAAAGCCTGTGGAAGGG…	Contig4420	GGGGGGGAGGAGCTAGTTTCTTATTTCCGCTGTTGACGAAGTTTTCTCTTTTTTCTGAGGAAATTACTTTCTTTTTGTTGGACAAAAATGGCTGCAACTCTACGTCCTTACCTTAATGCGGTTCGTTCAACTCTAACAGCATCAATGTGCTTGGAAAACTTTGATTCTCAAGTCGTGGAAAGGCATAACAAACCAGAAGTGGAGGTCCGCAGCGGCAAGGAGTTACTGCTAACACCAGTCGTTATAAGCCGAAACGAGAGAGAGAAAGTTCTTATTGAAGGTTCCATCAATTCCCTCAGGATAAGCATCGCAGTAAAGCAGGCTGACGAGATAGAGAAGATTCTTTGCAAGAAATTCATGCGTTTTATGATGATGCGGGCCGAACATTTTGTGATTCTC…	Actin-related protein 2/3 complex subunit 4 OS=Mus musculus GN=Arpc4 PE=1 SV=3; Accession=ARPC4_MOUSE; E-value=3.0e-78	A7RRG4_NEMVE	A7RRG4_NEMVE	NA	0.001
SEQINDEX14452_C_c	GAGTGCCACATTCTCTTGAAGGAGTACAAAACTTCCAAGGACGTTCTTGCTAATAATTGTTATGCTACTGGCAATGTCATTTTGTCGTTGGACAAAAATTGCAACGGAATGAACATTTCGCTGGCGAATGTTTTGTCACGTTCTTCCAGTTTTGTGTGATGTTTCGTTTTGTTAAGTATTCAGACAAACGGGACTGTGCCGCAAATGCCGTTCGCCTTACTTCGTACCACATGAACGGGGAGTCAGCCGCTTCATCACAACAGTATCCACCAAATCAAATCTTAGAAAATAATAATCGGCCAGCAATTAATGCCTCGTCTGGATCAGAAATCATCGGGCCTACTGGCACAGTTCGAGGATTCAAAAACATAATTACCCAACGAAAGGAGTTCTTACGAC…	Contig281	GGGCATGTATTCGTTAACGGGGACTCTCTAGGGGGTGCTAAAGAACTAGAGAATCTTAATGAGACTGGAGAACTCAAGATTTTACTGCAAAACTTTGAGCGGCGAAATGGACCTGTTTGTCAAGTCTGTGGAGGGTTTCGCTACATTAACTGCGTCCATTGTCATGGCAGCAAGTGTTCACGAAAAACAAGAATTTCAAGACAGATAAGCGTCCTGCGTTGCACCTCTTGCAACGAAAACGGACTGCAGCGTTGCCCAGAATGTGACAAGAACTAACTGCTTTCAGCTTGTTGTGAAGTGATCGAGCCCCTATGACAAATGCATTATGCATTAATTAAGGAAATTTAATGGTAGTATCAAAGTTGGTTGGGGCTATGTCGCTGTGTATTGGTGGCAAGC…	Uncharacterized protein At5g39865 OS=Arabidopsis thaliana GN=At5g39865 PE=1 SV=1; Accession=Y5986_ARATH; E-value=4.0e-22	A7RFF8_NEMVE	A7RFF8_NEMVE	A7RFF8_NEMVE	0.001
SEQINDEX6495_C_c	TTTCTGAAGAAACGACATTATTTGAGCCTTGTTATCTCGAGCAATATACCATGGCTCAGCGCAATGTCAACAGAAGGAAAGCTCTTCGCTCANTAGCCAGGTTCCAACCCTACGTCCTCGACTGCCTTGTTTCCACGAACTGTTTTACCAAGGGCTGCGTCAACACCTGAAATATGTTTGATTCGAACTGAAGCCAAAACAGAGGAAAAAGACTCGAATAAAGCAAAATATACTCGACCGCGAAGTGTTAGCTTTCATCCAGATATAAGACTTTATTATGCTGCTACGACCAATGATTTAGAAGAGGTAAGGATGTTGGTAGAGTCAGGCATGGCGGATGTGAACGCGAAGAATCCAGCCGAAGGGGCGACGGCTTTGCACGGCGCTGCGTACGAAGGC…	CCHX10290.b1_c_s	GGGAGAGGAAAAAGACTCGAATAAAGCAAAATATACTCGACCGCGAAGTGTTAGCTTTCATCCAGATATAAGACTTTATTACGCGGCTACGACCAATGATTTAGAAGAGGTAAGGATGTTGGTAGAGTCAGGCATGGCGGATGTGAACGCGAAGAATCCAGCCGAAGGGGCGACGGCTTTGCACGGCGCTGCGTACGAAGGCAACGTTGATTGTGTACGATATCTGCTGGAAAGCGGCGCAGATGTGGATTTACGCGACGACGATGGATGGACAGCGTTACACGCCGCCGTGTGCGGCAAAAGAAGAAAGTGTGTAGCCCTGTTGCTAGAGGCTGATTTCGACGCCTTCGCAGAGAACATCGACCGACTGACCCCTTTTCAAATGGCAGTTGAAATGGG…	Delta-latroinsectotoxin OS=Latrodectus mactans PE=1 SV=1; Accession=LITD_LATMA; E-value=3.0e-12	A7SK81_NEMVE	A7SK81_NEMVE	NA	0.001
SEQINDEX9544_C_c	GACTGGGCCACAAGTAACACAGATGGATCGACCGTGCGATTGTATCCTTTAACAAATTACACATTTGGAACAAAGGAAGCATTGTACGAGAAGGACAGTTCAGTGCAGGCAAGATTTACAAGGATGAGGGAAGAATATGATAAGTTTGGTATGAGAAAAACTGTTGAAGGAGTACTGATCGTGCATGAGCATGGATTGCCACATGTGTTATTGTTGCAGCTAGGAACAACATTTTTCAAACTGCCTGGTGGTGAACTAGTGGCAGGAGAAGATGAGATAGAGGGACTTAAAAGATCTATGACTGAAATCTTAGGGAGACCTGAGCAAGGAGCTGAAGTAGACTGGGTCGTGGAGGACTGCCTTGGAAACTGGTGGAGGCCAAACTTTGAAGCTCCTCAG…	Contig3509	GGGGATTTTAAGATGGCGGTCAATGACAGAATGAATGCACGAGGTTGGCCAAGGAGTCGGGCCTCAAGTAATGCAGGAAAATACTTGACTGGGCCACAAGTAACACAGATGGATCGAACCGTGCGATTGTATCCTTTAACAAATTACACATTTGGAACAAAGGAAGCATTGTATGAGAAGGACAGTTCAGTGCAGGCAAGATTTACAAGGATGAGGGAAGAATATGATAAGTTTGGTATGAGAAAAACTGTTGAAGGAGTACTGATTGTGCACGAGCATGGATTGCCACATGTGTTATTGTTGCAGCTAGGAACAACATTTTTCAAACTGCCTGGTGGTGAACTAGTGGCAGGAGAAGATGAGATAGAGGGACTTAAAAGATCTATGACTGAAATCTTA…	Cleavage and polyadenylation specificity factor subunit 5 OS=Xenopus laevis GN=cpsf5 PE=2 SV=1; Accession=CPSF5_XENLA; E-value=5.0e-86	A7RMH9_NEMVE	A7RMH9_NEMVE	NA	0.001
SEQINDEX1248_C_c	TGAGAACGCAACTGGAAATACAAACGAAAGCTCTTAACAAACATCTGCTAGTAGAGGAAATGAGTCTTTCATTAAAGACGCCGGATTTTAGCAAAGGAAGGGGTGCAAAAGGCAAACGACGAGAGCTGGGGGAAGAGCAAAAACAAGAAATCAAAGAAGCGTTCGACCTTTTCGATACAGATAAAGATAGAGCAATTGATTATCACGAACTCAAGGTGGCAATGCGGGCTCTTGGATTCGATGTGAAGAAAGTTGATGTTCTAAAAATCATGAAAGATTATGACAGAGAATCTACTGGGAAAATTACATTTGATGACTTCAATGAAGTCATGACTGACTGGATGTTAGACAGAGATCCACAAGAGGAAGTTTTCAAAGCATTCAGATTGTTTGATGATG…	CCHX2497.b1_c_s	GGGGGTTTCCCAAAGCAACAGCCCGCGTGCAAAAAAAGTGAGAACGCAACTGGAAATACAAACGAAAGCTCTTAACAAACATCTGCTTGTAGAGGAAATGAGTCTTTCATTAAAGACGCCGGATTTTAGCAAAGGAAGGGGTGCAAAAGGCAAACGACGAGAGCTGGGGGAAGAGCAAAAACAAGAAATCAAAGAAGCGTTCGACCTTTTCGATACAGATAAAGATAGAGCAATTGATTATCATGAACTCAAGGTGGCAATGCGGGCTCTTGGATTCGATGTGAAGAAAGTTGATGTTCTGAAAATCATGAAAGATTATGACAGAGAATCTACTGGGAAAATTACATTTGATGACTTCAATGAAGTCATGACTGACTGGATGTTAGACAGAGATCCACA…	Centrin-3 OS=Homo sapiens GN=CETN3 PE=2 SV=2; Accession=CETN3_HUMAN; E-value=4.0e-73	A7RU39_NEMVE	A7RU39_NEMVE	A7RU39_NEMVE	0.001
SEQINDEX14143_C_c	CAAGCAATGTAGCCATCAATAGTCAAAATTCTTTAACCAAACAAGAAAAACTAGAGAGAAGAAATGCTTTTCGTGAACCAGGAGGAAAACGCAAGGATTACAAGTCTAACAGTCGGAACGAGCATAGTCGTAGGTATGGCATGGTCGTGGAGGATGTTAACATAGATATGGATGATGTTGTTTACGACATTCAACAAGGCAAGCTCTCATTAGATGCGCTGCCAAAACTCGGACTCTTTCCATTACACGAAGCAGTTGCTCATGGTCTTACAGACTGTGCGGAGAATCTTATTGAACTTGGACTACAAGTGACAAGTGAGACTCCTGATGGACTTACACCTCTAGAAATTGCAGTCTTGGCGGGTAACTTTGACGCCGCAGAATTGCTGATTCGACATG…	Contig1602	GGGGATTTTATAGCAGAAATATCACGGACGCACCACTAACTTCATGTAACCAAGAACAACAACTCTCAACATGAAACAAGAAGGGGAACTTAGAGACTCCGAGGATCTGATGAAAAGAAGGAGAAGTAACAGACGAAAAGATTCAAGCAATGTAGCCATCAATAGTCAAAATTCTTTAACCAAACAAGAAAAACTAGAGAGAAGAAATGCTTTTCGTGAACCAGGAGGAAAACGCAAGGATTACAAGTCTAACAGTCGGAACGAGCATAGTCGTAGGTATGGCATGGTCGTGGAGGATGTTAACATAGATATGGATGATGTTGTCTATGACATTCAACAAGGCAAGCTCTCATTAGATGCGCTGCCAAAACTCGGACTCTTTCCATTACATGAAGCAGT…	Dysferlin-interacting protein 1 OS=Mus musculus GN=Dysfip1 PE=2 SV=1; Accession=DYSI1_MOUSE; E-value=2.0e-06	A7S8P9_NEMVE	A7S8P9_NEMVE	A7S8P9_NEMVE	0.001
SEQINDEX7592_C_c	CGAAATTCGTGGGGTAAAACGACCTCTTGTGGAGAATTACAGCGACGAAGAAGAGGAAGAAGAAGCTAGAATAAAGGAAGAGCGCAGCGAATATCAAAGCAGACATTGTCCATACCTTGACACTATTGACAGGCATGTTCTTGATTTTGATTTTGAGAAGCTCTGTTCTGTTTCATTATCTCATATCAATGTGTATGCTTGCTTGGTATGTGGAAAATACTTCCAAGGTAGAGGACGTCGCTCTCATGCATACACACACAGTGTTCAAGTGGGTCATCATGTGTTTCTCAATCTCCGTACATTAAAGTTCTACTGTTTACCTGACAACTATGAAGTTATTGACTCATCTTTGGATGATATAAAGTATGTATTGAATCCCACTTTTGCCAAAGATGAGAT…	Contig4029	GTGATTTTACAGGCTTTAGCATTTATTCCACCAATACGTGACTTCTTCCTCGCAGAAGAGATATATCAGAAAATTAAACGCCCCCCTGGAGATATCATGTTTCATTTGGTTAACAGGTTCGGTGAACTTATCAGGAAGATATGGAATCCACGGAACTTCAAAGCTCATGTCAGCCCTCATGAAATGTTACAGGCTGTGGTTTTATGCAGCAAGAAGAGATTCCAATTCACAGAACAAGGCGATCCAGTGGAATTTCTTTCTTGGTTTTTAAATTCTCTTCATACTACTCTTGGAGGGACCAAGAAAGCAACAAGCAGTGTCATTTATAAAACATTTCAAGGCAAGATGAGAATAACCTCCAGAAAACTTCCTCAAACTGAGAATGATGAGGAGCTCAAA…	U4/U6.U5 tri-snRNP-associated protein 2 OS=Mus musculus GN=Usp39 PE=2 SV=2; Accession=SNUT2_MOUSE; E-value=1.0e-175	A7RU34_NEMVE	A7RU34_NEMVE	A7RU34_NEMVE	0.001
SEQINDEX4549_C_c	ATAAGAATATTTCGAATAGGTTTAGTTGGAAAGGATTCACCTCACGGAAATGTCTAGTTTATCGGATGATCAGATTTCGGAACACAAAGAAGCTTTTATGCTCTTTGATCGGAGGGGAGATGGAAAAATTGAATCAGCACAACTTGGAGAAGTCCTCCGTTCCCTTGGACTTAACCCTACACAAGCTGACGTGAAAAAGGCGTTGAACGAAGTGGACCCGAAAGGTAATAAACGTATCTCTTTTGAAGAATTTTTGCCAATCTTCCTCTCCATTGGCCAAAAAAAGCCAATCAACAGCTCCAATGAAGGATTTGTTGATGGTCTTCGTGTGTTTGATAGAGAGGGCAATGGGCAGATATCAGCTGCAGAGCTACGGCATGTACTCACGGGGCTAGGCGA…	Contig2112	GGGGATTTTCACTATGAGAATATTTCGAATAGGTTTAGTTGGAAAGGATTCACCTCACGGAAATGTCTAGTTTATCGGATGATCAGATTTCGGAACACAAAGAAGCTTTTATGCTCTTTGATCGGAGGGGAGATGGAAAAATTGAATCAGCACAACTTGGAGAAGTACTCCGTTCCCTTGGACTTAACCCTACACAAGCTGACGTGAAAAAGGCGTTGAACGAAGTGGACCCGAAAGGTAATAAACGTATCTCTTTTGAAGAATTTTTGCCAATCTTCCTCTCCATTGGCCAAAAAAAGCCAATCAACAGCTCCAATGAAGGATTTGTTGATGGTCTTCGTGTGTTTGATAGAGAGGGCAATGGGCAGATATCAGCTGCAGAGCTACGGCATGTACTCA…	Myosin-2 essential light chain OS=Drosophila melanogaster GN=Mlc-c PE=1 SV=1; Accession=MLC2_DROME; E-value=4.0e-42	O96949_GEOCY	O96949_GEOCY	A8BNX9_GIALA	0.001
SEQINDEX8821_C_c	TTTCCCATCACTGCTCTCCGAGAAATTAAGATTCTGCAGTTGCTGAAGCACGAGAATGTGGTCAACCTCATGGAAATTTGTCGAACCAAAGCCTCACCTTATAATCGCAACAAAGGAAGTATCTACCTTGTGTTTGAGTTTTGTGAACATGACCTAGCTGGTTTGCTGAGCAACCATCAGATCAAGTTCCAAGTATCAGAGATGAAGAAGCTGATTCAGATGTTGCTGAATGCGCTGTACTTCATTCACAGTAACAAGATTCTTCATCGGGACATGAAGGCTGCAAATGTTCTCATCACAAAGAATGGTGTTCTAAAATTGGCTGATTTTGGGTTGGCTCGCGCTGTCCATGTTAACAAAGAGCAATTGCAACGTTACACAAACAGAGTTGTCACACTT…	Contig733	GGGGTGTTCTAAAATTGGCTGATTTTGGGTTGGCTCGCGCTGTCCATGTGAACAAAGAGCAATTGCAACGTTACACAAACAGAGTTGTCACACTTTGGTACAGGCCACCAGAACTCCTGCTTGGAGAGAGAAACTATGGCCCTCCTATTGATCTGTGGGGTGCAGGTTGCATCATGGCAGAACTATGGACGCGAACTCCCATCATGCAGGGAAATTCTGAACAACATCAGTTAACTCTCATTAGTCATCTTTGTGGTTCAATAACATCTGAGGTTTGGCCAGCAGTGGAAAAACTGGATTTGTTTAACAAAATGGTCCTTCCAACTAATCAGAAACGACGTGTGAAAGAAAGGCTGCGCAGTTACGTCAATGACAACCTTGCGCTGGATTTGATTGACC…	Cell division protein kinase 9 OS=Gallus gallus GN=CDK9 PE=2 SV=1; Accession=CDK9_CHICK; E-value=1.0e-128	A7SNE8_NEMVE	A7SNE8_NEMVE	A7SNE8_NEMVE	0.001
SEQINDEX22129_C_c	ACTTCCACGGCAAGTTGTGAGACATGGGAGGTGTGAAGAAGTTCGACTATCCTAAATATGTGTGGTCTCCAGCTGGTGGATGGTGGTGCAATCCTAGAAACTGGAAACGAAACACTGCCATAGCTTTTGGAGTGATATTTGCGATGTGCATACCGGTTCATTATATCAGTTGGTCCTTAGAGAGACGCTATGTGCCTCCTTACAGACACATCCCATCTCAACGATTCTGCAAACATGCCAAGGAAGATGACCCAAGCTTACCAGATGACTACCAGCTTATAAACTGGTCTAAATAAGCTGTTTACATTATTACTACAACAATCATTTCCTCTTTGTATTCATCTTTAAGTATTCCATCTGATGTTTGTACCTTTTCCTGAGGATATTATTGGGTTGGAA…	Contig617	GGGGGAATCCTCCATTTCCACGGCAAGTTGTGAGACATGGGAGGTGTGAAGAAGTTCGACTATCCTAAATATGTGTGGTCCCCAGCTGGTGGATGGTGGTGCAATCCCAGAAACTGGAAACGAAACACTGCCATAGCTTTTGGAGTGATATTTGCGATGTGCATACCGGTTCATTATATCAGCTGGTCCTTAGAGAGACGCTATGTGCCTCCTTACAGACACATCCCATCTCAACGATTCTGCAAACATGCCAAGGAAGATGACCCAAGCTTACCAGATGACTACCAGCTTATAAACTGGTCTAAATAAGCTGTTTACGTTATTACTGCAACAATCATTTCCTGTTTGTATTCATCTTTAAGTATTCCATCTGATGTTTGTACCTTTTCCTAAGGATAT…	NA	A9SG47_PHYPA	A9SG47_PHYPA	NA	0.001
SEQINDEX16138_C_c	ATTCATGATGAACCAAGATGGCGTGCGGTAGAACGCGACCGAACATTTTGGTGACGGGGACCCCAGGTACGGGTAAAACAGTTTTGGCAACTGAGCTAGCGCAGAGAACAGGACTTCATTACATCAACATAGGTGATTTGGCCAAAGAAAATGATTTATACGATGGATGGGACGAGCAATACGCTTGCCACGTGCTTGATGAAGACAAGGTTGTGGATGAAATAGAAGATCAAATGAGTGAGGGAGGGAATGTTGTGGATTATCATGGCTGTGATTTCTTCCCTGAGAGATGGTTTGATATTGTGTTTGTTTTACGCACAAATAACACAACACTTTATGAAAGACTTGAACAAAGGGGATATGATGGTAAAAAGCTGAGTGAAAACGTGGAATGCGAAA…	Contig6259	GGGGACAGAAAAACAGAATTTATGAACCAAGATGGCGTGCGGTAGAACGCGACCGAACATTTTGGTGACGGGGACCCCAGGTACGGGTAAAACAGTTTTGGCAACTGAGCTAGCGCAGAGAACAGGACTTCATTACATCAACATAGGTGATTTGGCCAAAGAAAATGATTTATACGATGGATGGGACGAGCAATACGCTTGCCACGTGCTTGATGAAGACAAGGTTGTGGATGAAATAGAAGATCAAATGAGTGAGGGAGGGAATGTTGTGGATTATCATGGCTGTGATTTCTTTCCTGAGAGATGGTTTGATATTGTGTTTGTTTTGCGCACAAATAACACAACACTTTATGAGAGACTTGAACAAAGGGGATATGATGGTAAAAAGCTGAGTGAAAA…	Adenylate kinase isoenzyme 6 OS=Homo sapiens GN=AK6 PE=1 SV=1; Accession=KAD6_HUMAN; E-value=3.0e-62	A2BGQ5_DANRE	A2BGQ5_DANRE	NA	0.001
SEQINDEX16114_C_c	ATAATCGCTTGCGTTGGATCGCGGCAACATCGTGTCTCCTCGACACAGAATATCTCTGACCATAAAGCGCCGATTTCAGTTCCTCCACCCGTCAACTGTAAATTGTATCATCGAACAGTCGCCTAACGCAGTCAAGATAATTCATCGGAAGTTTTCCGACATTGCTTGCCAACGTTCAGAGGAACAGAAAAGTTACCTTCCAAGTTTGAAAGGAAAATGGCGACACAAACTTTTTTTACGTCCAGTGTAGCTTTGGACACACTATCTGCTGCTAGATGTTTATTGGACTTGTCAAAAATTTTCCCTAAGCGACCGGCACCAGCGTGCGTCGAGAGCTCTTCCTCTTCTCCGTTGTTGATGTTCGCCAAAATCCTGGCCTCGATGGAAGAAGAATGCTTC…	CCHX14236.b5_c_s	GGGGCTGGAAACGGAGACATGTAGCGTTACTCGAAGCGGCGCAATTGTCGACACGCCCTCTGAACTGATCACAAAACCAAAACAAAGGAACCGGCGCCGCAATACACGCCGAAGAACGGAGCAGGAAAAGAAAATACACGCTTGTCACTATCTTGGATGCGATAAAAAGTACGGCAAAAGCAGCCACCTGAAGGCGCATCTCCGAACTCACACTGGCGAGCGGCCGTTTCGGTGTAATTGGACAGGTTGCGAGAAAAAGTTCGCTCGTTCCGACGAACTTGCACGACACTACAGGACCCACACCGGAGAAAAGAGATACGTGTGTACAACTTGCGGCAAGCGTTTCATGAGGAGCGATCATCTTTCGAAACACGCTAAAACTCATGGATTGAACTCGAG…	Krueppel-like factor 13 OS=Homo sapiens GN=KLF13 PE=1 SV=1; Accession=KLF13_HUMAN; E-value=7.0e-37	A7SVG8_NEMVE	A7SVG8_NEMVE	NA	0.001
SEQINDEX7253_C_c	TGACATTGGAACAGCTTATACAAAGTGTGGTTTTGCCTCAGAGACTAGTCCGCGTCATATTATTCGCAGTATAATTTCACACACAATCAATGGACAGACAGAGACAGTCAATGTGATTTCTAATGAACATGATAGACATCCTGATGAATTGTATGCAATAATAAGAGACTTCCTTCATCAAATATATTTCCGATACCTTCTTGTCAACCCGCGTGACAGACGTGTTGTTATCTGTGAGTCACTCCTTTGCTCCACGGTTTGGAGGAATGCTGTCGCTAAAGTCCTCTTCAAGCATTTTGAGGTTCCATCAGTGTTATTTGCACCTCATCATCTCTTGGCATTGTTTACTCTTGGAATTCCTTCTGGTCTCATCATGGACTGTGGCTATTCAGAGACCAT…	Contig3883	GGGGAGAAGTCTTACATGAAGAACTTAGAGAGTGCAGCTAAAGACGGGATGAAAATGGAATAACAGATTGAAATCAATAATGCCTTTATTTGATGTGATCGGGCTTGGAGGAGAGAAACACGCTGTTATCATCGACATTGGAACAGCTTATACAAAGTGTGGTTTTGCCTCAGAGACTAGTCCGCGTCATATTATTCGCAGTATAATTTCACACACAATCAATGGACAGACAGAAACAGTCAATGTGATTTCTAATGAACATGATAGACATCCTGATGAATTGTATGCAATAATAAGAGACTTCCTTCATCAAATATATTTCCGATACCTTCTTGTCAACCCGCGTGACAGACGTGTTGTTATCTGTGAGTCACTCCTTTGCTCCACAGTTTGGAGGAA…	Actin-related protein 10 OS=Bos taurus GN=ACTR10 PE=2 SV=1; Accession=ARP10_BOVIN; E-value=1.0e-102	A7S805_NEMVE	A7S805_NEMVE	A7S805_NEMVE	0.001
SEQINDEX14220_C_c	TCTTCAAAGGATTAGTGTAATGCCTCAAGCACAAACAAAACCCTTGCAAAATTAATTTTGTGGGCTTGTTTTTGAAGGACTTTTAATTGCTGAAACATTTTGCTGGAAATGAAACTTTCTGCTTAAATTATAACATACAGGTGTTTAGTATTAGTGAGAGTAAATTTTGGTGCACAAGGTACAAGGAATTTTGCAATCTCAAGAGACGGATAGAGGAGCATGAAGGTAGTCTGGAAAAGTTTTCAAAAGGTTATGAGAGATTTGGAATCAACAAGACGTATGAGGGTCTCACTTATAGAGAGTGGGCACCGGAAGCCAAGGGCTTGTATCTCATCGGAGATTTTAATGGCTGGTCAAGGACTTCACATCCTTGTACAAAGAATGAGTTTGGTGTGTGGG…	Contig6190	GGGAGAAATATCATTGGCTGGAATCACCTCAGGCCTATGTAAGCCTTCACCACGAGGACGATAAATTGATTGTGTTTGAGAGAGGAACGCTATTGTGGGTGTTCAACTTTCACACTACCAAGAGTTTCGCGGATTACAGAATCGGCGCCGGTACTGCGGGGAAATACAGAATAGCACTGGACTCAGATGCGGCTTCGTTTGGTGGACACGGACGGCTGGATGTTAACTGTGAATATTTAGTAGACAGTCAACCATGGCACGACAGACCCTTCTCATTATTGGTATACATTCCCTGTCGCAGTGCTTTGGTTCTAGCTCCAGTTTGATTGAAAATCGCTAATAGATCACTATCTATGCTAAAGTTAGTCAGTCAACGTGTCGGTCCTACTCTATCAACAG…	1,4-alpha-glucan-branching enzyme OS=Mus musculus GN=Gbe1 PE=2 SV=1; Accession=GLGB_MOUSE; E-value=0.0e+00	A7S1S6_NEMVE	A7S1S6_NEMVE	NA	0.001
SEQINDEX9052_C_c	ATTTGTTTCTGGAAGACAGCGCCAAGAAGCAACACAACAGACGGTTCAGTCGCTTCTAGATGAGAATTCACAACTTATTCAGGCCATTGTGGATTATCAGAGTAAAGGAAAAGCTTATGAATGTACTCAATACCAGCAGCTGCTGCATCGGAACTTGGTTTACCTGGCAACATTGGCAGACTCGTCGCAAAGCATGCAGAACACTATTCCAGCACCAGGTTCACAAAGTGGAACCAGCATGAAGACACCGCCTACCTCTGTGACTCCACCCTCTGCATCCGGTATGCTTCAACAAGGGTTATCTGATATGACATCCTCTTCGGGAACTTCATCAAGTGATATCATGTCAAATACACCTGGTATCAATAGTGGAATACCTTCTGCTATGAATGATCCTCT…	Contig4452	GGGGGGTATTACCAGGGTGTTACTAATTTTTTTTCACCAGTGTTATGCAAAGATGTCGATGACATTTGTTTCTGGAAGACAGCGCCAAGAAGCAACACAACAGACGGTTCAGTCGCTTCTAGATGAGAATTCACAACTTATTCAGGCCATTGTGGATTACCAGAGTAAAGGAAAAGCATATGAATGTACACAATACCAGCAGCTGCTGCATCGGAACTTGGTTTACCTGGCGACATTGGCAGACTCGTCGCAAAGCATGCAGAACACTATTCCAGCACCAGGTTCACAAAGTGGAACCAGCATGAAGACACCGCCTACCTCTGTGACTCCACCCTCTGCATCCGGTATGCTTCAACAAGGGTTATCTGATATGACATCCTCTTCAGGAACTTCATCAAG…	SS18-like protein 1 OS=Homo sapiens GN=SS18L1 PE=1 SV=2; Accession=S18L1_HUMAN; E-value=8.0e-23	A7SAM5_NEMVE	A7SAM5_NEMVE	NA	0.001
SEQINDEX16395_C_c	CAACGTTTCTTCAGAAAATGGACGAGTTTCAAGGCGCAGAAGAAACATCCTTCGTCGTAGATGAAGTGAGCAACATCATAAAAGAATCCGTTGAGGGAGCAATCGGTGGAAACGCCTACCAACACAACAAAGTGAACCAGTGGACGTCAAATGTGGTGGAACAGTGCTTGAACCAGCTTACAAAGCTTGGCAAACCGTTCAAGTACATCGTCACCTGTGTCATCATGCAGAAAAATGGAGCAGGCCTTCACACTGCTAGTTCTTGCTTTTGGGATAATACTTCGGATGGCAGTTGCACAGTGAGATGGGAAAACAAAACCATGTATTGCATCGTGAGCGTGTTTGGCTTGGCGATTTGAAGACACCGCAAGCAAGTCGACCTAAGAATTGTATTTTACA…	Contig3088	GGGGGAAAGTAATCTTGCGCATTTTGGCAACGTTTCTCCAGAAAATGGACGAGTTTCAAGGCGCAGAAGAAACATCCTTCGTCGTAGATGAAGTGAGCAACATCATAAAAGAATCCGTTGAGGGAGCAATCGGTGGAAACGCCTACCAACACAACAAAGTGAACCAGTGGACGTCAAATGTGGTGGAACAGTGCTTGAACCAGCTTACAAAGCTTGGCAAACCGTTTAAGTACATCGTCACCTGTGTCATCATGCAGAAAAATGGAGCAGGCCTTCACACTGCTAGTTCTTGCTTTTGGGATAATACTTCGGATGGAAGTTGCACAGTGAGATGGGAAAACAAAACCATGTATTGCATCGTGAGCGTGTTTGGCTTGGCGATTTGAAGACACCGCAAGC…	Dynein light chain Tctex-type 1 OS=Rattus norvegicus GN=Dynlt1 PE=1 SV=1; Accession=DYLT1_RAT; E-value=8.0e-54	A7S9M2_NEMVE	A7S9M2_NEMVE	NA	0.001
SEQINDEX12509_C_c	CGCCTGGCACGTTTCGTACTTTTACCTCAAAACCTTTCAATGAGATCATTTTGCGCATTTAATCAATGAGCTTTCTCCCCGGGACCGCGAGCCTCATCAAGGAAATCGATAAAAATTAATGGTTGTCCTAAGAGATGGAAGAACACTTATAGGATACCTGAGATCTATTGATCAGTTTGCAAATCTCCTACTGCAAGATACCATAGAAAGGATTCATGTGGGAGAAAAATATGGCGATATTCCAAGAGGAATTTTTTTGGTTAGAGGAGAAAACATGGTCCTCATGGGAGAGATAGATGAAGAAAAGGAAGCTAACTCAAAGCTAAAAGAGGTATCAGTACCAGAAATCCTTGAAGCACAAAGGGAGGAACAGGTAGCAAAAGAAGAAGAGGAGAAGGT…	Contig793	GGGGAGTCTACACTTTGTTTCAGATTTCTCTTTATCGCCTGGCACGTTTAGTACTTTTACCTCAACACCTTTTAATGAGATCATTTTGCGCATTTAATCAATGAGCTTTCTCCCCGGGACCGCGAGCCTCATCAAGGAAATCGATAAAAAATTAATGGTTGTCCTAAGAGATGGAAGAACACTTATAGGATACCTGAGATCTATTGATCAGTTTGCAAATCTCCTGCTGCAAGATACCATAGAAAGAATTCATGTGGGAGAAAAATATGGCGATATTCCAAGAGGAATTTTTTTGGTTAGAGGAGAAAACATGGTCCTCATGGGAGAGATAGATGAAGAAAAGGAAGCTAACTCAAAGCTAAAAGAGGTATCAGTACCAGAAATCCTTGAAGCACAAAG…	U6 snRNA-associated Sm-like protein LSm1 OS=Mus musculus GN=Lsm1 PE=2 SV=1; Accession=LSM1_MOUSE; E-value=2.0e-30	A7RYM0_NEMVE	A7RYM0_NEMVE	NA	0.001
SEQINDEX3305_C_c	GGGCGTTGAAGTAGATTCAAAATGGCGTCTAGCTTTGTGAAAAGGACAACAGCATTAGTTGGCTTGACAGTTGCGAAGGAACCAAGAGAGACTTTGCTCAAACTGTATAATGAGACCTTGAAGGTGTTGGGAAACATGCCACAAAGTGCTCAGTACAGAATAAATGCAGAACAGATTACCAAGCAAAGATTAGGCCTTGTGGAGCAGGAGACTGATGTCCCAACTTTGGAGCAAAAACTTGGTGCTGGACAAATTGAAGAAGTTATTAAACAGGCTGAAGATGAGTTATCCCTGTGTAACAAAATGCAAGACTGGAAGCCATGGGAACCACTTCAAACCCCATCACCTGAAAACCAGTGGAAGTGGCCATAAAAGAAATCCTCAACTTCAGTGAAGACC…	Contig198	GGGGGCGTTGAAGTAGATTCAAAATGGCGTCTAGCTTTGTGAAAAGGACAACAGCATTAGTTGGCTTGACAGTTGCGAAGGAACCAAGAGAGACTTTGCTCAAACTGTATAATGAGACCTTGAAGGTGTTGGGAAACATGCCACAAAGTGCTCAGTACAGAATAAATGCAGAACAGATCACCAAGCAAAGATTAGGCCTTGTGGAGCAGGAGACTGATGTCCCAACTTTGGAACAAAAACTTGGTGCTGGACAAATTGAAGAAGTTATTAAACAGGCAGAAGATGAGTTATCCCTGTGTAACAAAATGCAAGACTGGAAGCCATGGGAACCACTTCAAACCCCATCACCTGAAAACCAGTGGAAGTGGCCATAAAAGAAACCCTCAACTTCAGTGAAGA…	NADH dehydrogenase [ubiquinone] 1 alpha subcomplex subunit 5 OS=Bos taurus GN=NDUFA5 PE=1 SV=3; Accession=NDUA5_BOVIN; E-value=5.0e-29	A7SCA4_NEMVE	A7SCA4_NEMVE	NA	0.001
SEQINDEX1214_C_c	TTCCTTCATTTCAATTTCGCGTTTTTCTCTCTTTCGTAGTGGGTGGAGAATAGATGGATAAGCTGGTTGCAAGTCCGTTTTCAAAATATTTTCGCCGGAAGGACCGACTTTGATTGCTCTCTGTTCGTTGATGTTTTGGGTGCTTGTAGATGTACAAACCGGCGCATTAAACCAGCTGTTGTGGTCAGAATTAGCTCAATGGTGTTCTTCTTTTAGTGAATTAGCGCTTTTTTCGCGATGAGTTGTCGCTTAGTTACGAAGCCATTCCTCCACCTATGGAGGAGCCCGAACTCTTCAATCAAATTTAATACCTATAGTAGTATGTTCGGCTCGCAAACGCAAGTGTGGTCAAACGTTAGACAACATTCTCTTGACGAAGCAGCTTCGAAGTCATCAGTT…	Contig3179	GGGGGGCTGGAAGATTTAAGGACGGAACACATCTGTTGAAAAGTGCCCAGTTTCTCCACAAGGAGTTACCCATTCGCATTGCACGCAGAGTTGTGGACTTTCAACAACTCCCCCACATTTTACTCTGTAATCCAGTAATTCATGATGTGTATGAGCTGTACCTAAGAGCTTTCAGTGTACTCAACAAATTTCCCAAGGTTGAAACTCTTGAATTAGAGGAGAGGTACAGTCGTATTATCAAGCAACTGTTGGATGACCATCAAAGTGTAGTGACTCATTTAGCAGAAGGCTTCAATGAGTGCCAGAAAAATGTACCATATGAAACTATAAATGCCTTTCTCAATCGCACCTTGACATCAAGGCTGGGAATTCGAATGTTAGCAGAACACCATCTGGCCC…	[3-methyl-2-oxobutanoate dehydrogenase [lipoamide]] kinase, mitochondrial OS=Homo sapiens GN=BCKDK PE=1 SV=2; Accession=BCKD_HUMAN; E-value=1.0e-108	A7SER7_NEMVE	A7SER7_NEMVE	NA	0.001
SEQINDEX3558_C_c	CGGAGATATCGTTTCGCTTTTCGCAGAAGGGACTGTGAATGGCTTCATCAGTACGCTCGGCCTCATAGATGATCGGTGCGTTGTTCAGCCATCGGCCGGTGACCTCAACAACCCACCGAAGAAATTTCGAGATTGCTTGTTCAAGATTTGTCCTTCGAATCGCTATTCTGCTCAAAAACAATTCTGGAAGGCTGCGAAACCTACCACCAGCGCCACAGATGCAGTACTTCTAAAGAAACTCCATCATGCTGCAGAGTTGGAAAAGAAGCAGAATGATTCAGAATACAAGAAGTGTTTGGGAAGCGTGGTAGAATATGGAGGAGTAATACAGCTTCTTCATGTGAAAAGCAACAAGTTTTTGACAGTGAACAAGCGTCTCCAGCTCTGAGGGAGAAAAAT…	CCHX2980.b1_c_s	GGGGGGATTTGATGTACAACGTCTACAAGCCTAACTACATATTCAGTTGCTCAAGTTTGTTTATTTTTGCGTTGGATTCCTTTGTAGACCAGCGCATGGAAACAGCCGTGGATGTCACGAAATGATAGAGTCTTCAGCATCCGCATTTCCGTGGAATTCCAGATGTTTTGTGACATTTTTACGCGCGTAAATTCAGAATGGCTCAACAGACAAGCTTTCTTCATATCGGAGATATCGTTTCGCTTTTCGCAGAAGGGACTGTGAATGGCTTCATCAGTACGCTCGGCCTCATAGATGATCGGTGCGTTGTTCAGCCATCGGCCGGTGACCTCAACAACCCACCGAAGAAATTTCGAGATTGCTTGTTTAAGATTTGTCCTTCGAATCGCTATTCTGCTC…	Inositol 1,4,5-trisphosphate receptor type 1 OS=Rattus norvegicus GN=Itpr1 PE=1 SV=2; Accession=ITPR1_RAT; E-value=1.0e-148	A7SEK1_NEMVE	A7SEK1_NEMVE	NA	0.001
SEQINDEX12206_C_c	AAAAGGGAAGACAAAAATGGCGGAACCCGAGGGAATGGAAGTCGATTCTACTTCGGTAGCATCCACTTCTCAGGTGCAGTCAAGAAAAGATTCGAAGTGAAAAAGTGGAATGCCGTAGCGCTTTGGGCCTGGGATATTGTGGTGGACAACTGCGCTATCTGTCGCAACCATATCATGGATTTATGCATAGAATGCCAAGCAAATCAGGCTTCAGCTACAAGTGAAGAATGCACAGTTGCATGGGGTGTTTGTAATCATGCTTTTCACTTCCATTGTATCTCACGCTGGCTCAAGACTCGCCAAGTTTGTCCACTAGACAACAGAGAGTGGGAATTCCAAAAGTACGGCCGCTAAGCATGGATTGTTTCATTTTTGTTGCAGTAACATTTTTCTAAGAAT…	Contig2619	GGGGGCGTAAAAGGGAAGACTAAAATGGCGGAACCCGAGGGAATGGAAGTCGATTCTACTTCGGTAGCATCCACTTCTTCAGGTGCAGTCAAGAAAAGATTCGAAGTGAAAAAGTGGAATGCCGTAGCGCTTTGGGCCTGGGATATTGTGGTGGACAACTGCGCTATCTGTCGCAACCATATCATGGATTTATGTATCGAATGCCAAGCAAATCAGGCTTCAGCTACAAGTGAAGAATGCACAGTTGCATGGGGTGTTTGTAATCATGCTTTTCACTTCCATTGTATCTCACGCTGGCTCAAGACTCGCCAAGTTTGTCCACTAGACAACAGAGAGTGGGAATTCCAAAAGTACGGCCGCTAAGCATGGATTGTTCGATTTTTGTTGTAGTGACATTTT…	RING-box protein 1 OS=Salmo salar GN=rbx1 PE=2 SV=2; Accession=RBX1_SALSA; E-value=2.0e-53	Q52JL4_SALSA	Q52JL4_SALSA	NA	0.001
SEQINDEX6695_C_c	TGCCCTTTTCAAAGGATACTTTATTACGATGAATGGACAAACGTGTAAACCCTTTAAGCAAAGAAAAAGTTTTTCTGCAAGGAAGAACGATTCGGAGTGTATTATTCGACAATATCCCGATAAAGTACCGGTGATCGTGGAACGACTGAAAACCGAAAAGCACTTACCTGTCCTTGATAAAATCAAGTATTTGGTTCCATCGGACCTCACCATGAGTAGCTTGTCTAGTATTATAAGAAAAAGACTCCAATTATCTCCCACTCAGGCATTCTTCCTCCTTGTGAATGAAAAGAATCTGGTAAGTATATCAATCACTGTTGGGGAGGTTTACAAAGATGAAAAAGACGAGGATGGATTTATCTACATGGTCTATGCCTCACAAGAGACCTTTGGTTCCTC…	Contig1188	GGGGGGATTGAAAAACAAAACAAAAATTTCAGCTGTAGATCTGTTTATCTTCGCGTGCCCTTTTCAAAGGATACTTTATTACGATGAATGGACAAACGTGTAAACCTTTTAAGCAAAGAAAAAGTTTTTCTGCAAGGAAGAACGATTCGGAGTGTATTATTCGACAATATCCCGATAAAGTACCGGTGATCGTGGAACGACTGAAAACCGAAAAGCACTTACCTGTCCTTGATAAAATCAAGTATTTGGTTCCATCGGACCTCACCATGAGTAGCTTGTCTAGTATTATAAGAAAAAGACTCCAATTATCTCCCACTCAGGCATTCTTCCTCCTTGTGAATGAAAAGAATCTGGTAAGTATATCAATCACTGTTGGGGAGGTCTACAAAGATGAAAAAG…	Microtubule-associated proteins 1A/1B light chain 3A OS=Bos taurus GN=MAP1LC3A PE=2 SV=1; Accession=MLP3A_BOVIN; E-value=4.0e-36	A7SKK3_NEMVE	A7SKK3_NEMVE	NA	0.001
SEQINDEX6748_C_c	CAATTAAGGACGCTTTAGCAAGTTGGGAGAAGAAGCATGAGTGCAAAGCTAGTGAAGCAACAGAAATCAAGCTTTATGCTCAATACCCACCCATAGAAAAGATGGATGCATCCTTGTCCACTCTTGCCAACTGCGAGAAACTCTCTCTATCCACAAATTGCATCGAGAAAATCGCTAACCTCAATGGCTTAAGAAATATCAAAATTTTGTCATTAGGAAGAAATAACATCAAAAACTTGAATGGCTTGGAGGCAGTGGCAGACACACTTCAAGAACTTTGGGTATCCTACAATAACATTGAGAAGCTCAAAGGGATTGGTGTACTAAAAAAACTGAAGGTGTTATACATGTCAAATAATCAAGTCAAAGCATGGGATGAATTCCAAAAGCTGGCTGAGC…	Contig658	GGGGGAATTTTCAGCTGTCGATAGGTGGAAATGCATTTGTGACAGATAACATGTCTAAAGGAACCACAATTAAGGACGCTTTAGCAAGTTGGGAGAAGAAGCATGAGTGCAAAGCTAGTGAAGCAACAGAAATCAAGCTTTATGCTCAATACCCACCCATAGAAAAGATGGATGCATCCTTATCCACTCTTGCCAACTGCGAGAAACTCTCTCTATCCACAAATTGCATCGAGAAAATCGCTAACCTCAATGGCTTAAGAAATATCAAAATTTTGTCATTGGGAAGAAATAACATCAAAAACTTGAATGGCTTGGAGGCAGTGGCAGACACACTTCAAGAACTTTGGGTATCCTACAATAACATTGAGAAGCTCAAAGGGATTGGTGTACTAAAAAAAC…	Dynein light chain 1, axonemal OS=Bos taurus GN=DNAL1 PE=2 SV=1; Accession=DNAL1_BOVIN; E-value=7.0e-71	A7RP35_NEMVE	A7RP35_NEMVE	NA	0.001
SEQINDEX13833_C_c	CCAACTCCTATCAAGATGGCGGCGGATTCCGNAGCAGCACAGATGCAAAATTGCTGAAGAAACTAGGTGGAGTAGGGCTGGTAATGACAATTATCTTCGCCATATCGATTGTAATTGTAATTGTCATACTTGTGAAGCGTCAAATTCTCAGAATGTTATTGCTGTCAAAACGAGGACCTCATTCACCTGTTGGCTCTGATGCACCAAGGAGTTTAGGAAGAGATATTGCGGCACGCTTACAGAGAATTTCACAACTTAGGATGGAGCCAAGAATGTTATCAGAACAATTTAATAAACCATTGGATGGTACAGCAAACTTTGAATCTCCTTCAGACCAGTACACAAGAAGCTACAAGTATAGAATGAAAGCAATGGACAAAATGACTGAACTAGATGATC…	Contig1079	GGGAGAGGTTACTAAGTTCTTAGAGGCAATGTCGCTGGGGTTGTCCCGTAAACAAGCGATTTGATATGGAAATTTGTGTATATCGATTGGATATTTAATGATTTTTACTTAGTTTGATCCAATTATGCGGTGGGTGAAATCCTGAAATACTCGAAAATGTTCTGAAAATGTTCCACGTTTGAAAAAGAACCGAGGCTTTCTCCAACTCCTATCAAGATGGCGGCGGATTCCGTAAGCAGCACAGACGCAAAATTACTGAAGAAACTAGGTGGAGTAGGGCTGGTAATGACAATTATCTTCGCCATATCGATTGTAATTGTAATTGTCATACTTGTGAAGCGTCAAATTCTTAGAATGTTATTGCTGTCAAAACGAGGACCTCATTCACCTGTTGGCTCT…	Uncharacterized protein C1orf43 homolog OS=Mus musculus PE=2 SV=1; Accession=CA043_MOUSE; E-value=4.0e-11	A7RS78_NEMVE	A7RS78_NEMVE	NA	0.001
SEQINDEX3930_C_c	AAATCTGCGCTTACTATTCAGTTTATTCAGTCGCATTTTGTAAGCGACTATGATCCCACTATCGAAGACAGCTACAGAAAACAGTGTGTTATCGACGAAAGGGTGGCACATTTAGACATCCTGGATACAGCTGGTCAGGAAGAGTTCAGTGCAATGAGAGAACAGTACATGAGGAATGGCGAAGGTTTTTTATTAGTTTTCTCTGTCACAGATCGAGCTAGTTTTCAAGAGATACAGACCACTTTTCACCCTCAGATTCTACGAGTTAAAGATAGGTCAGAGTTCCCTATGATTTTGGTTGGAAACAAATCTGATTTAGAGCAAGAGAGAACGGTGTCAACTTCTGAAGGTCAAGAACTTGCAAGTGGCTATAAGATTCAGTATATTGAAACCAGTGCT…	Contig2631	GGGGACTGAAGACGCGGGTGAAGAATTCATTACTTTCTGTTATTCACGCTCGCCTTTGTAGATTAAAAGATATGGCTATGGCTGGAGATGCTGACAAACAGTACAAGCTGGTTGTAGTCGGTGGTGGTGGAGTCAGTAAATCTGCGCTTACTATTCAGTTTATTCAGTCGCATTTTGTAAGCGACTATGATCCCACTATCGAAGACAGCTACAGAAAACAGTGTGTTATCGACGAAAGGGTGGCACATTTAGACATCCTGGATACAGCTGGTCAGGAAGAGTTCAGCGCAATGAGAGAACAGTACATGAGGAATGGCGAAGGTTTTTTATTAGTTTTCTCTGTCACAGATCGAGCTAGTTTTCAAGAGATACAGACCACTTTTCATCCTCAGATTCTAC…	Ras-like protein RAS2 OS=Hydra magnipapillata GN=RAS2 PE=2 SV=1; Accession=RAS2_HYDMA; E-value=3.0e-65	A7SAS1_NEMVE	A7SAS1_NEMVE	A7SAS1_NEMVE	0.001
SEQINDEX3582_C_c	CGAGGTTGCGAAAGTTCACACTTCGATCAACCGTTCTTTTGCCATAGAAGTTAGCTCTACGTAGTCCTAACTCGATAACAAACATGGGATGCACAATCAGTGGCGAAGACAAGGCGGCCGTAGAGCGGAGTAAAATGATAGATAAGACGCTTCGTGCGGACGGCGAGAAAGCGGCGAGGGAAGTCAAGCTTCTCCTTTTGGGTGCTGGTGAATCAGGGAAGAGCACAATTGTGAAACAGATGAAAATTATTCATGAACATGGTTACACCCAAGAGGAATGTGCACAGTATAGGCAAGTTGTGTACAGCAACACAATTCAGTCAATGATTGCCATTATTAGAGCATTAGGAACATTGAAGATTGAATTTGGACACTTGGACAGAGCTGATGATGCAAGGG…	Contig97	GGGGGGGCGTGGTAGTGACAGTAGTGGTTGGTTCTTCCAACAAAAGCGAAGTAAGGAGCAGCAGTATTACTGTTACGAAAGTGAAGGGAAACCTACATGGCGAAGTCGTGAGGGATTTCGATATATGTGCTTCGGGTAAAAGACGCCCCAAGACGTCCAATTATAGTTCTGGGCTTGTGTTTCCTGTAGTGAATATTGCGAGGTTGCGAAAGTTCACACTTCGATCAACCGTGCTTTTGCCATAGAAGTTAGCTTGACGTAGTCCTAACTCGATAACAAACATGGGATGCACAATCAGTGGCGAAGACAAGGCGGCCGTAGAGCGGAGTAAAATGATAGATAAGACGCTTCGTGCGGACGGCGAGAAAGCGGCGAGGGAAGTCAAGCTTCTCCTTTTGG…	Guanine nucleotide-binding protein G(i) subunit alpha OS=Asterina pectinifera PE=1 SV=3; Accession=GNAI_ASTPE; E-value=1.0e-177	A7RG04_NEMVE	A7RG04_NEMVE	A7RG04_NEMVE	0.001
SEQINDEX16058_C_c	CAAGACAGGTATCACAAGGAATGGTTGGCCAAGTCACAGCCAGAAGGGCAGCTGGTGTTATTCTAGAGATGATCAAGGAAGGAAAGATTGCTGGCCGAGCGGTTTTGATAGCAGGGCATCCTGGCACTGGAAAAACAGCCATTGCTATGGGTATGGCACAATCCCTTGGTCCTGACACACCTTTCACAGCCATTGCTGGCAGTGAAATATATTCACTTGAGATGGGAAAGACAGAAGCTCTTACACAGGCATTCAGAAGGTCAATTGGTGTGCGAATAAAAGAGGAAACAGAGATCATTGAAGGTGAAGTAGTTGAAGTACAAATTGACAGACCAGCTAGTGGAACAGGAGCCAAAATTGGCAAACTCACTTTGAAAACTACAGAAATGGAAACAATAT…	CCHX4585.b1_c_s	GGGGACCACGGCGTTCAAAATGGCGGCGGTTGCGGCACAGAAGGTTCAAGAAGTGAGAGATATAACAAGAATTGAAAGAATAGGAGCCCACTCACACATTCGTGGCCTTGGATTAGATGATGCCCTAGAAGCAAGACAGGTATCACAAGGAATGGTTGGTCAAGTCACAGCCAGAAGGGCAGCTGGTGTTATTCTAGAGATGATCAAGGAAGGAAAGATTGCTGGCCGAGCAGTTTTGATAGCAGGGCATCCTGGCACTGGAAAAACAGCCATTGCTATGGGTATGGCACAATCCCTTGGTCCTGACACTCCTTTCACAGCCATTGCTGGCAGTGAAATATATTCACTTGAGATGGGAAAGACAGAAGCTCTTACACAGGCATTCAGAAGGTCAATTGG…	RuvB-like 2 OS=Mus musculus GN=Ruvbl2 PE=2 SV=3; Accession=RUVB2_MOUSE; E-value=1.0e-99	Q0IH85_XENLA	Q0IH85_XENLA	Q6CQA8_KLULA	0.001
SEQINDEX66_C_c	AGAAAGACAAGGTCAATTGCTCTTTCTACTTTAAAATTGGTGCATGTCGACATGGCGAACGTTGCTCAAGACTTCATAACAAACCCACATTCAGCCAGACTATTTTGCTTCAAAACATGTATCAGAATCCACAAAGTGCAGCACAGGTTGCAGATGGAACAAGTAGCGCCATATCTGATGTAGAAGCTCAGGAACATTACGATAAGTTTTTTGAGGATGTATTTCTTGAGTTGGAGGAGAAATATGGAGAAATAGAGGAGATGAATGTTTGCGATAATCTTGGAGACCATCTGGTCGGCAATGTATATGTGAAATTCCGCTATGAAGAAGATGCAGAAAAGGCTGTCAAAGACCTTGACAATCGCTGGTACAATGGTCAACCCATCTACGCCGAACTGT…	Contig5493	GGGGGCTCCGAAGCTTGCAAGGGCTCCTGGGTAGTTAGCGTCGGCGTAGAAAAAAGCATGGCGGAATACTTAGCGTCAATCTTTGGAACAGAGAAAGACAAGGTCAATTGTTCTTTCTACTTTAAAATTGGTGCATGTCGACATGGCGAACGTTGCTCAAGACTTCATAACAAACCCACATTCAGCCAGACTATTTTGCTTCAAAACATGTATCAGAATCCACAAAGTGCAGCACAGGTTGCAGATGGAACAAGTAGCGCCATATCTGACGTCGAAGCTCAGGAACATTACGATAAGTTTTTTGAGGATGTATTTCTTGAGTTGGAGGAGAAATATGGAGAAATAGAGGAGATGAATGTTTGCGATAATCTTGGAGACCATCTGGTCGGCAATGTATAT…	Splicing factor U2AF 35 kDa subunit OS=Mus musculus GN=U2af1 PE=2 SV=4; Accession=U2AF1_MOUSE; E-value=2.0e-84	A7SD33_NEMVE	A7SD33_NEMVE	NA	0.001
SEQINDEX8913_C_c	AGTATTCACCTGTGAAGGATGTAAATCTTTCTTCAAACGGAGTGTTCGCCGTAACCTCAGCTACACTTGCCGAGCTTCACGAAATTGCCCAATTGATCAACATCACCGAAATCAGTGTCAGTATTGCCGGCTTAGAAAATGCATGAAAGTCGGAATGAGACGCGAGGCCGTCCAAAGAGGTCGAATCCCTCCAACACAAGTACCGCAACCGAGTCCTCAACACTCCGCGTTAAACGGTAATGATGTTTCAAATGGTCACTCATTTCTGTCTGGCTTTATCAGCCTTTTGCTGCGAGCAGAGCCATACCCCACCACAAGATTCCAACAGGGAATGAACATGCCGTGTGGTATAATGGGAATTGAAAACATCTGCGAGTTAGCAGCGCGGTTGTTGTTCAG…	Contig1866	GGGGGTTGCACGCGTGTTCTGTGGTGTCGAGACGCCACAGTCATGTTGCAAGAACATCGAAAGTGCCTTTTTTAGATAATATGGGTTATTTACTGACAACAGCAACAAAATGTAATCCTCTTCTGCAGTTAGTTCAGGAGGTGAACTTTGCGTGACTCGCGGTAATTATATTAGGAATTGAGTTGAGTGATAGCGGGCGGTCGGGCAAATGAATCTTAATTTGCCGGGTGGTATGGCCGGGGTCCCCGCTCAATCGTGGTGCACAGAAAAGACAGAGCCCTTAGAAGAATCGGCAGAGAAAAATGTGCAGCAAGTGGAATGTGCCGTATGCGGCGACAAATCATCGGGCAAACATTATGGAGTATTCACCTGTGAAGGATGTAAATCTTTCTTTAAACG…	COUP transcription factor 1 OS=Mus musculus GN=Nr2f1 PE=2 SV=2; Accession=COT1_MOUSE; E-value=1.0e-146	Q95WF7_ACRMI	Q95WF7_ACRMI	Q95WF7_ACRMI	0.001
SEQINDEX5246_C_c	ATACCCCCAAGTCTCTCACACTTGTCTTTGAATATCTGGAAAAGGATCTTAAGCAATACATGGATGACTGCGGAGGGATCATGAGTATGAACAACGTTAGATTATTCTTGTTTCAATTACTGAGAGGCCTGCATTACTGTCACAACAGGAAAGTTCTCCACAGAGATTTGAAGCCTCAAAATCTGTTAATAAATGACAAGGGAGAATTAAAATTAGCCGACTTTGGTCTTGCAAGAGCAAAGTCCGTACCCACGAAGACATATTCCAATGAAGTCGTGACATTATGGTACCGGCCGCCCGATGTTCTTCTTGGGTTCAACAGAATATTCGACACAAATCGACATGTGGGGCGTAGGTTGTATTTTCTTCGAGATGGCGACTGGCCGGCCTTTCTTTCCG…	CCHX6798.b1_c_s	GGGTGGCCGACCTTTCTTTCCGGGGTCAACAGTTGAGGATCAACTGCATTTGATTTTTAAAACATTGGGTACCCCAACAGAAGAATCATGGCCGGGCATCACCGCTAACGAAGTGTTTGTTTCAGGGAGATTTCCTCATTATTCAAGGGAACATCTTGTAAATCACGCACCAAGGCTTGATAACTCTGGACTCAATTTGCTTGAAAGATTTGTAGAGTTCGTTGTAAAGGACAGAATATCAGCCATAGACGCTATGAAGCATGAGTATTTCTTCAATTTGGGCAAACGCGTTCGAGAATTAAAGAATGCTGAGTCGATTTTCAACATAGAAGAACTTCGATTGAGCAAAGACCCGGGTTACAGGCACGGGGCAAGGTCTAATCTCGCTGGTGCTACTCG…	Serine/threonine-protein kinase PCTAIRE-2 OS=Homo sapiens GN=PCTK2 PE=1 SV=2; Accession=PCTK2_HUMAN; E-value=1.0e-106	A7RK70_NEMVE	A7RK70_NEMVE	A7RK70_NEMVE	0.001
SEQINDEX4533_C_c	TGGTGTTTATTTACTTGAAAATGGAATTTCTCTTTTCTTGTGGATTGGACTTCAAGTTGATCCCAATTTGCTGCATGAAGTGTTTGGCGTTCAAACCATTGGCCAAGTAGACATTGAAATGACATCTTTGCCAGTCCTTGACAACCCTCTTTCGACGCGACTGAATGAAATCATCCACAAAATCCAGGAACAAAGACAGCATTATCTTAAGTTAACTGTTGTTCGACAGCGAGACAAGCTTGAAGCATGGTTTAAGCACTTGCTTGTGGAGGATAAAGGAATCAACCCAGCTGCAAACAGTTATGTTGACTTTCTCTGCCAAATGCACAAGGAGATCCGCAATTTGATGAATTAATATGAAAAGAAAAACAGATTAAAGGCAGACTTACCATGAAATAA…	CCHX10701.b1_c_s	GGGGGCCACAGGTCTGCCACTGGTTATCAGGTGTTCAGCTGAGCGGATGGCAGAGAATGGTGTTTATTTACTTGAAAATGGAATTTCTCTTTTCTTGTGGATTGGACTTCAAGTTGATCCCAATTTGCTGCATGAAGTGTTTGGCGTTCAAACCATTGGCCAAGTAGACATTGAAATGACATCTTTGCCAGTCCTTGACAACCCCCTTTCGACCCGACTGAATGAAATCATCCACAAAATCCAGGAACAAAGACAGCATTATCTTAAGTTAACTGTTGTTCGACAGCGAGACAAGCTTGAAGCATGGTTTAAGCACTTGCTTGTGGAGGATAAAGGAATCAATCCAGCTGCAAACAGTTATGTTGACTTCCTCTGCCAAATGCACAAGGAGATCCGCAA…	Protein transport protein Sec24C OS=Homo sapiens GN=SEC24C PE=1 SV=2; Accession=SC24C_HUMAN; E-value=4.0e-29	A7S3D9_NEMVE	A7S3D9_NEMVE	A7S3D9_NEMVE	0.001
SEQINDEX22033_C_c	TGTAGTCTGCGTCTTTTGCAGCAATTCTAATGATCTATTTTGAGCGTATCTACGACATACTGGCTTCAATGGCAAATAGCTTCTGATGGACGAAACATAACTCACTACCGTGGTTTGTTCAGACATTGCTGGGAGTCCAGAGATAACGTCACAAACGAGCTTCAAACATACGACGGAAGAACTGATTGCGATGGAAAATTTACTGATTTTAAAACAGATTGGAATGGTGTAACCATAGCCTTCATGGTCTTGGGTCTCCTGTTCCATTTCATAGCCTTTATTGTAGCTATTGTGGCAGCTTGTCGTAAAGGACACCCATTTCCATCATTCTGGGTTGCTGGAATGTTCTTTGTGGCAGCAATACTGGTTGTTATTGCATTGTTGGTTTACACATTCCAC…	Contig796	GGGGGGCTCAAGGTGAAGTTACATTTTTATGTAGGAGTTAATCTTAAATATATCTCATATTCTGTCCTTTAGGACGAAGCTCAGTCATGATCAAAGTTATAACAGCTGTAGTCTGCGCTTTTGCAGCAATTCTAATGATCATTTTGAGCGTATCTACGACATACTGGCTTCAATGGCAAATAGCTTCTGATGGACGAAACATAACTCACTACCGTGGTTTGTTCAGACATTGCTGGGAGTCCAGAGATAACGTCACAAACGAGCTTCAAACATACGACGGAAGAACAGATTGCGATGGAAAATTTACTGATTTTAAAACAGATTGGAATGGTGTAACCATAGCCTTCATGGTCTTGGGTCTCCTATTCCATTTCATAGCCTTTATTGTAGCTATTGTGG…	NA	A7REZ1_NEMVE	A7REZ1_NEMVE	NA	0.001
SEQINDEX16333_C_c	GGAGTCACCTGACTATCAAGCGAGGGGAAGGTTGTAGTACTTTCACTAGTGTAAAAACGAACTAAAATAATAGTTTTACATCCCTGCCAGGATGTCTTCCCTCTTTAGGTCAGAGCAAATGACACTGGCCCAACTTTTCCTTCAAGCAGAGGCTGCTTACGCTTGCGTTAGCGAGCTTGGAGAATTGGGCCTAGTGCAATTCCGAGATTTGAATCCTGATGTAAATGCTTTTCAACGGAAGTTTGTTAATGAAGTGAGGCGATGTGAAGAAATGGAAAGAAAGCTAAGGTTTTTAAGGAAAGAAATTGAGAAGGCTGACATTCATGTTGTTGACACTGGGGAAAACCCTGAAGCTCCCCACCCACGGGAGATGATTGACCTTGAGGCTCAATTTGAACA…	Contig2769	GGGGAGTCACATGACTATCAAGCGAGGGGAAGGTTGTGGTACTTTTAGTATTGTAAAAACGAACTAAAATAATAGTTTTACATCCCAGCCAGGATGTCTTCCCTCTTTAGGTCAGAGCAAATGACACTGGCCCAACTTTTCCTTCAAGCAGAGGCCGCTTACGCTTGCGTTAGCGAGCTTGGAGAATTGGGCCTAGTGCAATTCCGAGATTTGAATCCTGATGTAAATGCTTTTCAACGGAAGTTTGTTAATGAAGTGAGGCGATGTGAAGAAATGGAAAGAAAGCTAAGGTTTTTAAGGAAAGAAATTGAGAAGGCTGACATTCATGTTGTTGACACTGGGGAAAACCCTGAAGCTCCCCACCCACGGGAGATGATTGACCTTGAGGCTCAATTTGAA…	Vacuolar proton translocating ATPase 116 kDa subunit a isoform 1 OS=Mus musculus GN=Atp6v0a1 PE=1 SV=2; Accession=VPP1_MOUSE; E-value=5.0e-84	A7S1B9_NEMVE	A7S1B9_NEMVE	NA	0.001
SEQINDEX9798_C_c	CGTCTTATCGCTCGAATCCATCGGACTGGTCGAAATACGCCAACTACGACCCTCACAGGTACACGAGAAATTTAGTCGATGAAGGAAACGGGAAGTTCAACGTAATCGTGTTGTGTTGGGGAGAAGGTCAAGGCAGCTCGATTCACGACCATGCAGATTCCCACTGCTTTTTAAAGGTTCTAGATGGAAGACTCAAGGAAACACAATTCCCTTGGCCATCAGAATCTGAACCAGAGAAACCTATTGAACCAAAAGGGTCAAGATTTTATGAAACCAATGAAGTCAACTACATAAACGATAGCATTGGCCTTCATCGTGTCGAGAATGTCAGTCACACAGACACTGCAGCATCACTGCATGTCTACATTCCTGCATTTGACGTGTGTCAATCATTTGACC…	Contig47	GGGGAGAGCGGGAAGTCGGTCTACCATGGAGACTAAACCATCACTGAAATCTCCCGAAACTTTGGAGGATGTCGTGAAAGGCCTGCATGTGTACTTTGAGGAAGACCATGTAGATGTCGAAGAGGTTATTTCGTTTTTATCGTCTTATCGCTCGAATCCATCGGACTGGTCGAAATACGCCAACTACGACCCTCACAGGTACACGAGAAATTTAGTCGATGAAGGAAACGGGAAGTTCAACGTAATCGTGTTGTGTTGGGGAGAAGGTCAAGGCAGCTCGATTCACGACCATGCAGATTCCCACTGCTTTTTAAAGGTTCTAGATGGAAGACTCAAGGAAACACAATTCCCTTGGCCATCAGAATCTGAACCAGAGAAACCTATTGAACCAAAAGGATC…	Cysteine dioxygenase type 1 OS=Danio rerio GN=cdo1 PE=2 SV=1; Accession=CDO1_DANRE; E-value=1.0e-47	Q2PFL1_CYPCA	Q2PFL1_CYPCA	NA	0.001
SEQINDEX3345_C_c	CGACGCCAATCTGGAACGAAGAGTTTGAACAGGAAATAGAAAATGGAGATAAATTAGGGATAACCGTATTTCACGACGCTATCATGGGGCCGGATCCATTTGTTGCAGATTCATCGGTGCCTTTCGAAGAGATAATGAACTCAGGAGTCAAAGGATTCTCCGATATCTGGATTTCTCTTGAGCCCGAAGGAAAATTGCACCTACACATTGAACTAAGGCCTGCCATTCAAGATAAGGAAATAAGGGTTTTCAAGGAACGAGAGAGCGGCATTAAAGGACGTAGAGGGGCTATGAGACGTCGAGTACATCAGATTAGCGGACATAAATTTATGGCTGTTTGGCTCAGACAGCCTACGTATTGCTGCCATTGCAAGGATTTCATTTGGGGAGTGTTTAACA…	Contig3118	GGGGATTGACTGCAAGAGTGGTGTGGTGTATTGGTCGGAGTAGGCCTTCGTGAGCAAATCGAAGAATGCTGTGCTTTCCGTAGACTTAAGCAGTATTTTTGCACGTTTTTGAGTGTCGAACGTTGTTTAGAGCAAGATGGTAGGCTTCACTGGCTACGTAAAGCTGAAGGTGATTGGAGCGACTGATCTGAAACCTGCGGTTTTGGCTCAAAGACGTCTAGGTGGACTTAAATCTATCGACCCCTATGTATCTTTAAACGTTGACGACCTACATATAGCACGGACATCGTCCAAGCAAAAAACTTCGACGCCAATCTGGAACGAAGAGTTTGAACAGGAAATAGAAAATGGAGATAAATTAGGGATAACCGTCTTTCACGACGCTATCATGGGGCCGGA…	Protein kinase C eta type OS=Homo sapiens GN=PRKCH PE=1 SV=3; Accession=KPCL_HUMAN; E-value=1.0e-65	A7SL27_NEMVE	A7SL27_NEMVE	Q8MXB6_LIMPO	0.001
SEQINDEX8841_C_c	TGACACCGGTGACTGGATTGGTACTTTTGAAGGCCACAAAGGAGCCGTCTGGAGTGCCACTCTGAATAAAGATGCTACAAAGGCTGCCACAGGGGCAGCTGATTTTTCAGCGAAAGTGTGGAATGCCCTTTCTGGTGATGAAGAACTCACCTTACCGCATAAACACATTGTTAAGATTGTGGACTTCTCTCCTAATGGGCATCAACTCCTAACAGCCAGCAATGAAAAACTGATGAGAATATTTGATCTTCAAAATGAAAATGCAGAGCCAGACTTGTTAAAGGGTTATACAGTCAACATTAGAGCTGCTCTATGGAGCAAAGATAGCAAGTTTGTCTTTAGTGGAGGAGAAGACAAAGCAATGAGGCTTTGGGATACAAGAACAATGAGTGAAGTAAA…	Contig3918	GGGATACAAAGGCACTTCACCATTCCATTGCTAGGTTATCATTTCCCTCTATTTCAACCACATTTAAAATTATAATCCTTGCGAAGTATGGCACGGCAAATACCTCTAACGTGTAGTGGACACACGAGGCCGGTGGTACATTTATCATTCTCGGACATCACTCCTCACGGTTACTTTCTTATTAGCGCCTGCAAAGATGGAAAACCTATGCTACGACAGGGTGACACTGGTGACTGGATTGGTACTTTTGAAGGCCACAAAGGAGCCGTCTGGAGTGCCACTCTGAATAAAGATGCTACAAAGGCTGCCACAGGGGCGGCTGATTTTTCAGCGAAAGTGTGGAATGCCCTTTCTGGTGATGAAGAACTCACCTTACCGCATAAACACATTGTTAAGATT…	Serine-threonine kinase receptor-associated protein OS=Gallus gallus GN=STRAP PE=2 SV=2; Accession=STRAP_CHICK; E-value=1.0e-94	B2RUC7_MOUSE	B2RUC7_MOUSE	A7SV44_NEMVE	0.001
SEQINDEX7682_C_c	GCAGAAGTAGTGTTTTATCGTTGCAAGATTTTTTGCAGAGTTTGAGGATTTTAAACGCTTCGAGACTCTCTAGTTTAATATGCCAGTAAAAGTCAAGGTAGTTTATTGTGGTGCCTGAGGGTACAAACCCAAGTTTAAAGAGATTGAGAGGAGAATCCTTGAAATCTTTGATGATGATGAGGTTGAAGTGGAGGGCACAGGGACTCGTAGTGCAACTGGGTGGTTGGAAGTGCAAGTGAATGGGATGCTCGTTCACTCAAAAAAGAATGGTGATGGGTATGTGGACACCAAAGCAAAGATGCAGAGGATTTTGGATGCCATTTCATCAGCTAATGGCACAGCTTGAGTGTCCTCAAGGTGTATAGGAGAAATGGGTGCAATTGAGTTTGAAACAGATCT…	Contig1508	GGGGAACTTTCATCTTTGGGGCGTCAGTTTGCAGAAGTAGTGTTTTATCGTTGCAAGATTTTTAGCAGAGTTTGAGGATTTTAAACGCTTCGAGACTCTCTAGTTGCAATATGCCTGTAAAAGTCAAGGTAGTTTATTGTGGTGCCTGAGGGTACAAACCCAAGTTTAAAGAGATTGAGAGGAGAATCCTTGAAATCTTTGATGATGATGAGGTTGAAGTGGAGGGCACAGGGACTCGTAGTGCAACCGGGTGGTTGGAAGTGCAAGTGAATGGGATGCTTGTTCACTCAAAAAAGAATGGTGATGGATATGTGGACACCAAAGCAAAGATGCAGAGGATTTTGGATGCCATTTCATCAGCTAATGGCACAGCTTGAGTGTCCTCAAGGTGTATAGGAG…	Selenoprotein W OS=Danio rerio GN=sepw1 PE=2 SV=3; Accession=SELW_DANRE; E-value=3.0e-19	B1H2E3_XENTR	B1H2E3_XENTR	NA	0.001
SEQINDEX1403_C_c	GGACCGGCATCTCATCTCTCNCTAGCAATGGCGTTCGTCAAGAAATCAACAAACCGGCGCCGTTACTAAGGACAGTCGTGCCAGGAAATCGGACGCTTGATGAAATATACGAAGATGAAGCTCGTGAAATTGTCGATGAAGCAATTGACAATGCTCGCCGTCGTTTGGCAGTGTCCCGTGGAGAGTCTTTGCCCATGGACGGTGAAGCTGCGAAATACGAGAACGAGGAGCCTGTAAATGACCCTGAAACTGGATTCGAGATCCCTAATATTACATGGATGACCGCGGCGAACTTCACCGTGGCTGGAGGGTTAGAAAAAATTGAAGAATTTATTACGACGTGGGAGCGTGACAGTAGCTGGCTATACTGTATTGATTTCCTGAGAGAAGAGGAGCACC…	CCHX8134.b1_c_s	GGGGACCGGCATCTCTATCTTAGCAATGGCGTTCGTCAAGAAATCTAACAAACCAGCGCCGTTACTAAGGACAGTCGTGCCAGGAAATCGGACTCTTGATGAAATATACGAAGATGAAGCTCGGGAAATTGTCGATGAAGCAATTGACAATGCTCGCCGTCGTTTGGCAGTGTCCCGTGGAGAGTCTTTGCCCATGGACGGTGAAGCTGCGAAATACGAGAACGAGGAGCCTGTAAATGACCCTGAAACTGGATTCGAGATCCCTAATATTACATGGATGACCGCGGCGAACTTCACCGTGGCTGGAGGGTTAGAAAAAATTGAGGAATTTATTACGACGTGGGAGCGTGACAGTAGCTGGCTATACTGTATTGATTTCCTGAGAGAAGAGGAGCACCC…	A-kinase anchor protein 14 OS=Rattus norvegicus GN=Akap14 PE=2 SV=1; Accession=AKA14_RAT; E-value=5.0e-30	A7RYL6_NEMVE	A7RYL6_NEMVE	NA	0.001
SEQINDEX15319_C_c	TATTATTCAGCAACGCTGCTGATGTGTGTTTCAGCAACGAATTTGCGTTAATTTTTACTCTTCGAAGTATTTTTTGAAAGTAATATTTTCATGGGACAGGAGGCGTATGTGTTGGGAATATGTGAACATGCTATTACGTTCCTTTCTAGTGCGTTGGGATACAGTAAAGTTGAATCAGTCAATGCAAGATGTCAGCAAATTTGTGATGAATGGAGAAACCTTGGCCTGCTCACAGAAGATCGCCGATCCACGATTGAGACACGCGAGGCAGTGCTGCAGAAGTTAGACGCTCTATTACTCGAGTTTGCCAAAAGAGCAGCTCCCTACAACAACTGGCTGGAGAGTGCAAGAGGAAGATTTGATGGACATGTTTAGCGTGCACACAGTGGAGGAGATTGT…	CCHX4944.b1_c_s	GGGGTTCACGAAAACCCTTACACTAGTCTTACAAAGGAGGAAATTAATTTAGCCTGGGATGAAGTACAAAGTTTGGTTCCTAAGAGAGATGACTTGCTCAAAAATGAAAAAGGCCGTCAGGAACGAAATGAAACTCTACGTGTTGAGTTTGCAAACAAAGCAAATTCAGTTGGTCCGTGGATCAAGAGCCTCGAGGAAAGATTACGATCAATTGCCCTCACGATGGAGGGTCCGTTAGAGGAACAACTGTTAGCTGTGCAAGAACTTGAACGCGATGTGGCAAACTACAAGCCACAGATGGATGAACTAGAGGTAGTTCACCAGGATGTCCAAGAAGCAATGATTTTTGAAAATCCTCACACGGAGTATACCATGGAAGCGCTGCGCGTCAACTGGGAG…	Alpha-actinin-4 OS=Rattus norvegicus GN=Actn4 PE=1 SV=2; Accession=ACTN4_RAT; E-value=1.0e-133	A7S4X0_NEMVE	A7S4X0_NEMVE	NA	0.001
SEQINDEX5244_C_c	AAATATGAAAAACTGGAGAAGATCGGTGAAGGTACCTATGGAACAGTTTTTAAAGCAAAACACAAGGAAACACACGAGATAGTCGCGCTAAAACGAGTAAGACTCGACGAAGATGAGGAGGGTATCCCCAGTTCAGCCCTGAGGGAAATCTGCATTTTAAAAGAATTGAAACACAAGAATATTGTGAGATTACACGATGTTATGCACAGTGAAAGAAGACTGACTTTAGTGTTTGAGTATTGTGATCAGGACTTAAAAAAGTACTTTGACAGCTGTCAAGGAGAAGTTGATGCAGCTGTTGTCAAGTCCTTTATGTTTCAACTGCTGAGAGGTCTGGCTTTTTGTCACAGCTGCAATGTTCTTCATCGTGATCTCAAGCCGCAAAATCTTCTCATCAAC…	Contig586	GGGGAAGGCCTGGGTTAATGATGTCCTCGGGTTTTGTTGTCATCGACTGATTTATAAACCGTTTACCTAATTCTCTCCCTTAAAACCACCTCAACGCTGAATGTCGATTGTTAAAGAGGAGGTTTCATATTATGCAGAAATATGAAAAACTGGAGAAGATCGGTGAAGGTACCTATGGAACTGTTTTTAAAGCAAAACACAAGGAAACACACGAGATAGTCGCGCTAAAACGAGTAAGACTCGACGAAGATGAGGAGGGTATCCCCAGTTCAGCCCTGAGGGAAATTTGCATTTTAAAAGAATTGAAACACAAGAATATTGTGAGATTACACGATGTTATGCACAGTGAAAGAAGACTGACTTTAGTGTTTGAGTATTGTGATCAGGATTTAAAAAAGT…	Cell division protein kinase 5 OS=Homo sapiens GN=CDK5 PE=1 SV=3; Accession=CDK5_HUMAN; E-value=1.0e-134	A7RGF7_NEMVE	A7RGF7_NEMVE	A7RGF7_NEMVE	0.001
SEQINDEX14769_C_c	ATGCAGCCAGGTTGCTTTGCTTGCTTTGAGAGTTTGTGCATGGGTCTAAAAAAGTCAAAACCCGCAGGATTTGAACGTTATGATAACGTAAACACGATCGATGAAGTGAGTGTTACTGCTACTAGCACTGTGGTTGCAGAATACAGCTCAACTCATGAAGATTCGGTCACTTGTCTTGATTCTTTTGGCCCGGGAACGTGTTTAACAGGAAGCAAGGATAAATCCGTGATTTTGTTTGATTGGAGACAAGGTCAGCAGCTTCAACGATGGACGGGCCATACCAGAGATGTTACTAAAGTAAAGCACTCTGGTAACACTTTCTACAGTTCCTCCAGAGATAAGACTATAAAGGCCTGGCAGATGGGTAGAAGTGACCCACTGTTGACTTACGAGGGACAT…	Contig4962	GGGGGCGCACATTCGATACAAGATGGCGACCGATTGTTTGTGAATTTGCACTTAGGGTTAACGTTTCTACAAGACAGCAGCAAATGAGCTGATTCAGTTTTTCCATGCAGCCAGGTTGCTTTGCTTGCTTTGAGAGTTTGTGCATGGGTCTAAAAAAGTCAAAACCCGCAGGATTTGAACGTTATGATAACGTAAACACGATCGATGAAGTGAGTGTTACTGCTACAAGCACTGTGGTTGCAGAATACAGCTCAACTCATGAAGATTCGGTCACTTGTCTTGATTCTTTTGGCCCGGGAACGTGTTTAACAGGAAGCAAGGATAAATCCGTGATTTTGTTTGATTGGAGACAAGGTCAGCAGCTTCAACGATGGACGGGCCATACCAGAGATGTTACTA…	WD repeat-containing protein 31 OS=Mus musculus GN=Wdr31 PE=2 SV=1; Accession=WDR31_MOUSE; E-value=1.0e-19	A5WV44_DANRE	A5WV44_DANRE	Q6AXW6_RAT	0.001
SEQINDEX16137_C_c	ATCTCATTCGCTCCATCAATGACCCTGAACACCCTCTTACACTGGAACAGTTAAATGTGGTTGAGCAGTCATTGGTTGAGGTTGACGATGATAAAGGTTACGTCAAAGTACAATTCACACCTACGATACCACACTGCAGTATGGCAACCCTCATTGGGCTGGCGATACGAGTTCAGCTTCTAAGGTCACTTCCCGACAGATTTAAGGTTGACGTAAATGTTACTCCTGGATCTCATGCCTCGGAAGATGCAGTAAACAAACAGTTAGGTGATAAGGAAAGAGTTGCAGCAGCTTTGGAAAACTCTCACTTATTAGAGCTTGTAAACCAGTGCCTTGCAGTGCAACAGTGAAGCATCGTTTATAATGTGAATGTATCGTCTTCCATGTTAGTAGCATCAA…	Contig5986	GGGGAGTCAAAGAAACAACAAAAATGGCGGCAAGTTTGCAAAACGCGAACCCTATGGTCTTCAAGGCGAAACAAGAGCGAATTATTCTTCCCGAAGAAGAGGATGATAGTGTAGTTGATAAAATAGATGAACGGGAAGTATTCGTGATGCCAAGTTTTTGCCTACAAATCTAAACAACAGCAAACAACATTCAATATTTCCTTGACTGGAGTACATCTCATTCGCTCCATCAATGACCCTGAACACCCTCTTACACTGGAACAGTTAAATGTGGTTGAGCAGTCATTGGTTGAGGTTGACGATGATAAAGGTTACGTCAAAGTGCAATTCACACCTACGATACCACACTGCAGTATGGCAACCCTCATTGGTCTGGCAATACGAGTTCAGCTTCTAAGG…	UPF0195 protein FAM96B OS=Homo sapiens GN=FAM96B PE=1 SV=1; Accession=FA96B_HUMAN; E-value=2.0e-44	A7RPY9_NEMVE	A7RPY9_NEMVE	NA	0.001
SEQINDEX15478_C_c	GCACGAGATCTTGGTAAAAGAGTAGAGAGTGTGGCATAGTGAAGAAGAGAATTTATCTGTGAAACATGTTTTCCTGCAGCAAATTCGTATTGCCAGTTGCTAGAATATTGTTGGTAATGGTCGCGCAGTATCTCGGCCGCTCTCTACCGCTCTTCGTACCCATTCGCAACCTTTGGCAATGAATGTCCAGCCAGCACAAAAGAGTTTCTTTAATTTGTCTCGGGCAGTTGTATCAAGTCAATTTTCAAGTATGCAAAAAGATAATTCACAAGTTAAGCTGTTGCTCCTAGCTCTCCTGTGTTAGCTCTGGCTAGCCGTAGCTTCCAGACAAGTTCTAAGGTGCAGGATGTTGACTCTGCTGCCAAGTTTATTGGAGCTGGTGCAGCCACCGTTGGAGTT…	Contig343	GGGGGCCGTCCATCTTGGTGAAAGAGAAGAGAGTGTGGCATAGTGAAGAAGAGAATTTATCTGTGAAACATGTTTTCCTGCAGCAAATTCGTATTCCCAGTTGCTAGAAGTATTGTTGGTAATGGTCGCGCAGTATCTCGGCCGCTCTCTACCGCTCTTCGTACCCATTCGCAACCTTTGGCAATGAATGTCCAGCCAGCACAAAAGAGTTTCTTTAGTTTGTCTCGGGCAGTTGTATCAAGTCAATTTTCAAGTATGCAAAAGGATAATTCACAAGTTAAGGCTGTTGCTCCTAGCTCTCCTGTGTTAGCTCTGGCTAGCCGTAGCTTCCAGACAAGTTCTAAGGTGCAGGATGTTGACTCGGCTGCCAAGTTTATTGGAGCTGGTGCAGCCACTGTT…	ATP synthase lipid-binding protein, mitochondrial OS=Manduca sexta PE=2 SV=1; Accession=ATP9_MANSE; E-value=7.0e-19	A7S000_NEMVE	A7S000_NEMVE	NA	0.001
SEQINDEX4243_C_c	GGACTGCGCAAAAATTAAAGATGGCTTCCCAAGTTGGCTTGAAAGAGGTGGTTTCACTTTATCAAACCTTGATAAAAGAATGGAATAGAAAACCAGTTGAGCCTTGAAAAAGTAGGGAAGCTCCTTTCCGGAATGAAAATGGCTTTGATTCAGTTCTCATTCTTACCAACCTCNTCAACCAAACCAAGCCCNCAGGAGCTTCTTTTGGCGAGAGATGCCTAGAAATTGGTGTTCAGTGGAGCATCTTGAAGGAAGATATCCCTTCCTTTGAGAGATATATGGCACAATTAAAACCATACTATCTTGATTACAAAGGTATTCTGGAGGAATCTGCTTACATGTATCAGCTCCTGGGACTAAATTTGTTGTCTCTTCTGGCACAAAATCGCCTGGCAGAAT…	CCHX5127.b1_c_s	GGGGGAATTGTGACTGCGCAAAAATTAAAGATGGCTTCCCAAGTTGGTTTGAAAGAGGTGGTTTCACTTTATCAAACCTTGATAAAAGAATGGAATAGAAAACCAGTTGACCTTGAAAAAGTAGGGAAGCTCCTTTCCGGAATGAAAATGGCTTTGATTCAGTTCTCATTCTTACCAACCTCGTCAATCAAACCAAGCCCACAGGAACTTCTGTTGGCAAGAGATGCGCTAGAAATTGGTGTTCAGTGGAGCATCTTGAAGGAAGATATCCCTTCCTTTGAGAGATATATGGCACAATTAAAACCATACTATCTTGATTACAAAGGTATTCTAGAGGAATCTGCTTACATGTATCAGCTCCTGGGACTAAATTTGTTGTCTCTTCTTGCACAAAATCGC…	26S proteasome non-ATPase regulatory subunit 8 OS=Pongo abelii GN=PSMD8 PE=2 SV=1; Accession=PSMD8_PONAB; E-value=9.0e-64	A7SIL7_NEMVE	A7SIL7_NEMVE	NA	0.001
SEQINDEX10468_C_c	AGCAGTAGCCGCTTTGTTAGAATCTCTAAGCGTTTCATGAGCAACTGATCTCTCAACTCGACATGGCTAACGATCGCTTCTCCGTTGTCGATTACGTTGTTTTCTCCATAATGTTATTGATCTCAGCTCTCATAGGAGTATGGTACGGCTGTGGTCCTGGAGGAAAACAAAAGACGACATCCGAATATTTACTGGGGAATCGAAAAATGCGGCACTTTCCAGTTGCGATTTCTTTATTGGTGTCATATCTTTCTGCAATCACATTGCTAGGGGTTCCATCTGAGATCTACACCTACGGTGCTCAGTATTATGTCTTGATCTTGTCGTATTTCATAATTTGCGGCACTGTAGCCATAGTCTTCGTCCCGATGTTCCGCCGTGTGAATCTAACTTGCGCTA…	CCHX5874.b1_c_s	GGGGGTCAGTGATAGCGTCTCTAACCGGCAGCAGTAGCCGCTTTGTTAGAATCTCTAAGCGTTTCATGAGCAACTGATCTCTCAACTCGACATGGCTAACGATCGCTTCTCCGTTGTCGATTACGTTGTTTTCTCCATAATGTTATTGATCTCAGCTCTGATAGGAGTATGGTATGGCTGTGGTCCTGGAGGAAAACAAAAGACGACATCCGAATATTTACTGGGCAATCGAAAAATGCGGCACTTTCCAGTTGCGATTTCTTTATTGGTGTCATATCTTTCTGCAATCACATTGCTGGGGGTTCCATCTGAGATCTACACCTACGGTGCCCAGTATTATGTCTTGATCTTGTCGTATTTCATAATTTGCGGCACTGTAGCCATAGTCTTCGTCCCGAT…	Sodium-coupled monocarboxylate transporter 1 OS=Xenopus laevis GN=slc5a8 PE=2 SV=1; Accession=SC5A8_XENLA; E-value=7.0e-27	A7S7I5_NEMVE	A7S7I5_NEMVE	NA	0.001
SEQINDEX4691_C_c	TCGGGGTACGGTAGCTCAGTAATTTTCTCAAGATGTCGGGCGGTGGAAAGGACAGATTAAACGTTTTTCCTTCCAGGATGGCTTTGACAATGATGAAAGCGAGGCTGAAGGGAGCACAGAAAGGCCATAGTCTCTTGAAAAAGAAATCGGATGCACTGACAATGCGTTTCAGAAAAATTCTCAGGAAGATCATAGAGACCAAAACACTGATGGGGGATGTCATGAGAGAAGCGACTTTCTCGTTAGCGGAGGCCAATTTTGCAGCAGGGGATTTTAGCTATGTTGTGTTGGAGAATGTTGACAAGGCTCAGACAAAGATTCGTCTTAGAAAGGACAATGTTGCTGGTGTCCATTTACCCATTTTTGAAGCATATGCGGATGGAACCAACAGTTATGAGC…	Contig2290	GGGTGGCCACTAAGGGAAACAGATCTTGGTCGGTCGGGGTACAGTAGCTCAGTAATTTTCTTAAGATGTCGGGCGGTGGAAAGGACAGATTAAACGTTTTTCCTTCCAGGATGGCTTTGACAATGATGAAAGCGAGGCTGAAGGGAGCACAGAAAGGCCATAGTCTCTTGAAAAAGAAATCGGATGCACTGACAATGCGTTTCAGAAAAATTCTCAGGAAGATCATAGAGACGAAAACACTGATGGGGGATGTCATGAGAGAAGCGACTTTTTCGTTAGCGGAGGCCAATTTTGCTGCAGGGGATTTTAGCTATGTTGTGTTGGAGAATGTTGACAAGGCTCAGACAAAGATTCGTCTTAGAAAGGACAATGTTGCTGGTGTCCATTTACCCATTTTTG…	Vacuolar proton pump subunit D OS=Suberites domuncula GN=VATPD PE=2 SV=1; Accession=VATD_SUBDO; E-value=2.0e-84	A7S4Z2_NEMVE	A7S4Z2_NEMVE	NA	0.001
SEQINDEX6352_C_c	CTTCTTTAATGTGGCGAAAGGGAAGCAATGGCGACGTTCTTTGTAATAGTTGCCATTTAAAGCGAGTAAACACCAGTATCCGAATTCAAAGGCAAAGTTCGAAGGAAAGTAAGAAGCTTGTTGCAAGAATCAAGGCGAGTACCAGGAAAGGTTATAATGGGAAATCAGGAGAGAGATCCAGAGGACGTCGAGCACTTCAAAAGATTAAAAGAAAGCCATACAAGTCACCTGAAGGGTTTGCAACAATAGTGGCAGCAGACAGGATGTACTTCAAAGGAATCTTGTACCAAGCTGGTGACATTGTGTCCATTGAGGACATAGATGGTGATTTATATTATGCACAGTTAAGAGGCTTCATGCAAGATCAGTATGCACAGAAAACCGCAGTTATCACATGGC…	Contig2116	GGGGACAGATCAATGACACAAAATGGCGATCGCGGTAACTAACTGTGCGCAAAATAGTACGTCAAGTTATTCCTGAAAATGTCGCTGGATAACAGTCCACAGTGCTCAGCATGCAAAATCGCAACTTCTTTAATGTGGCGAAAGGGAAGCAATGGCGACGTTCTTTGTAATAGTTGTCATTTAAAGCGAGTAAACACCAGTATCCGAATTCAAAGACAAAGTTCGAAGGAAAGTAAGAAGCTTGTTGCGAGAATCAAGGCGAGTACAAGGAAAGGTTATAATGGGAAATCAGGAGAGAGATCCAGAGGACGTCGAGCACTTCAAAAGATTAAAAGAAAGCCATACAAGTCACCTGAAGGGTTTGCAACAATAGTGGCAGCAGACAGGATGTACTTCAAA…	GATA zinc finger domain-containing protein 1 OS=Danio rerio GN=gatad1 PE=2 SV=1; Accession=GATD1_DANRE; E-value=4.0e-38	A7S253_NEMVE	A7S253_NEMVE	NA	0.001
SEQINDEX8261_C_c	GCGGTCGATGTAGTACTAACGAAACACATTCAAGAAGCCATTGTAGAGGCCTCNCAAAGCAACTATCTTCCCCATGATCCTCGAAAAGCAGTTGTCACAGTACACTGGAGAATGCCTGGATAAGGATGAATCAAATTCAACCGAGAAGAAAATATCAGTCATTCCTTTCAAATTAGTGAAGAGGCTTTGGGAATGTCATTCAGAACATGTGGGCGAGCAGATTTGCCCTCCAAGCTGTATTTACATGAACTTTTAACTGGGAGTGAAATTTATGTGGAGCCTTTAAGATTACCAGAAAAGAGTCCGGAACTGATAGCCCGTCTGAATAAGCTGAAAGCAGAACAAGAACAAGCAGAGTACAACAGAATGATCACTAATGTTGATAGAAAGTGGAATCAA…	Contig2658	GGGGATACTGAATATGTCATGTAACAATGTTACTCGAACATGGCGGTCGATATAGTACTAACGAAACACATTCAAGAAGCCATCGTAGAGGCCTTACAAAGCAACTATCTTCCCCATGATCTCGAAAAGCAGTTGTCACAGTACACTGGAGAGTGCCTGGATAAGGATGAATCAAATTCAACCGAGAATAAAATATTAGTCATTCCTTTCAAATTAGTGAAGAGGCTTTGGGAATGTCATTCAGAACATGTGGACGCAGCAGATTTGCCTTCCAAGCTGTATTTACATGAACTTTTAACTGGGAGTGAAATTTATGTGGAGCCTTTAAGATTGCCAGAAAAGAGTCCGGAACTGATAGCCCGTCTGAATAAGCTGAAAGCAGAACAAGAACAAGCAGAG…	Transmembrane protein 199 OS=Pongo abelii GN=TMEM199 PE=2 SV=1; Accession=TM199_PONAB; E-value=7.0e-22	A8K610_HUMAN	A8K610_HUMAN	NA	0.001
SEQINDEX11161_C_c	GGACTTCCAACCACTCAATGGCGACCAGCCGAAGCAAGAAGGCTAAACGATCTCAAAGCCCTGCTTCGGCGTCTTGCCCTGTCCCAAGCAAGCGAAAAAGATCAGCAACGCCATGTGTGGCAGATGAAGTGGAATCGAACTCCAGCGGTCGAAGTAGTCTTTCGTCTTTCAGTGTCGTGAGCGAGGCTAATGTCAATCCAAAGGGGCAATTTGTATTCAAAGATGTTAATTTTGAGCATTCTGGCGTTAATGCAGGCAAGAAAAAGATCTGGAAAAATTTAAAGCAGATAATGGGCTTGGAAAGAGGGTTACCATGGAAACAAGATGATCCTACATATAGCAGCATTGATGCACCACCATCATTCAAACCAGCTAAGAAATATGCTGATCTCTCTGGTT…	CCHX4403.b1_c_s	GGGGACTTCTAACCACTCAATGGCGACCAGCCGAAGCAAGAAGGCCAAACGATCTCAAAGCCCTGCTTCGGCGTCTTGCCCTGTCCCAAGCAAGCGAAAAAGATCAGCAACGCCATGTGTGGCAGATGAAGTGGAATCAAACTCCAGCGGTCGAAGTAGTCTTTCGTCTTTCAGTGTCGTGAGCGAGGCTAATGTCAATCCAAAGGGGCAATTTGTATTCAAAGATGTTAATTTTGAGCATTCTGGTGTTAATGCAGGCAAGAAAAAGATCTGGAAAAATTTAAAGCAGATAATGGGCTTGGAAAGAGGGTTACCATGGAAACAAGATGATCCTACATATAGCAGCATTGATGCACCACCATCATTCAAGCCAGCTAAGAAATATGCTGATCTCTCTGG…	Uncharacterized protein C18orf37 homolog OS=Mus musculus PE=2 SV=1; Accession=CR037_MOUSE; E-value=6.0e-30	A7RRL5_NEMVE	A7RRL5_NEMVE	NA	0.001
SEQINDEX3285_C_c	CTATTGTTCCTCTGCTGATGGAGTTCCTGGGTGATTCAAATGAGCAAGCAGCATTTGATGTTTTGCTGTTTGTACGTGAGGCAGTTCAACGCTTTGAACAGTTGAAGCCAGTGATCATGGAGAAGTTGTTGGAAAATTTCCATACTATCAAAACTGTAAAAATTCATCGTCATGCCTTGTGGATCATGGGTGAATATGCCACCAGTAAGCAGGACATTTTGGATGTTATNNNNNNNNNNNNTTACCAAAGAAGGTGATCACAGATGATGATGTAGACCGTATCTCTTTGTGTGTTCGTGTCGTAGCCGAGCGTGTTCCTCTCATGAAAAATATTTTCACTGTCGAGTGCCGCAACTCATTGTCTTCCATGCTGGATGCTAATAAAAAGGGAGAGGAGCA…	CCHX15404.b1_c_s	GGGGGAAGAAGAACTTGTAGGCTCTAAACTCAACAAGGTTGCACAGCTAACAGGCTTCTCTGATCCAGTCTACGCAGAGGCATATGTGAATGTTAATCAATATGACATTGTGCTGGATTTATTGATTGTAAACCAGACTTCAGACACGCTGCAAAACGTTACTCTCGAACTGGCTACGCTCGGTGATTTGAAGCTGGTTGAGAAGCCGCAGCCCATTATGCTGGGACCAAATGACTTCTCCAATATCAAGGCAAATGTGAAAGTATCTTCAACGGAAAATGGTATAATTTTCGGCAATATAGTGTATGATGTATCAGGCGGCCCAGGGGATCGCAATTGTGTTGTTTTGAATGACATTCATATTGACATCATGGACTACATTGTGCCGGCCACCTGTAC…	Coatomer subunit beta OS=Rattus norvegicus GN=Copb1 PE=1 SV=1; Accession=COPB_RAT; E-value=1.0e-129	A7SMS0_NEMVE	A7SMS0_NEMVE	NA	0.001
SEQINDEX18378_C_c	GCACGAGGAAACTGAAGAGGTTGATATACCTGATTAGGAGAAAACTTAGGAAAATTGAAAATGCCGGGACATGGATGCCCAAAATTTGATGAACCATGGATGGAGGAATTAGATGGGGAAAATTGTGTTCAAAGAACGATGTCTTTTGCTGTTCAAGGGGCGCTAGTAGGCGGATTTTATGGTGCTGCTTACTCAGCTTTGAAAATACCAGACCCAGAACCAACCCCTCTCATTCTGCAGTCCTTTATTCACATGAAGAATTATTCACTCCTTCTTGGTGGAGCTGCGGGTCTCTTTGCGTTAACTACTTGCACCTCTGCATCCATGAGAGAGAAGGATGATCCATTGAATTGGTTTCTTGGTGGTGTCGTTAGTGGATCTCTGTTTGGATTTAGCAGA…	Contig2462	GGGGGGTTACTAAGTCATTTGACTTGAAACTGAAGAGGTTGATCCCTGATTAGGAGAAAACTTAGGAAAATTGAAAATGCCGGGACATGGATGCCCAAAATTTGATGAACCATGGATGGAGGAATTAGATGGGGAAAATTGTGTTCAAAGAACGATGTCTTTTGCTGTTCAAGGGGCGCTAGTAGGCGGATTTTATGGTGCTGCTTACTCAGCTTTGAAAATACCAGACCCAGAACCAACCCCTCTCATTCTGCAGTCCTTTATTCACATGAAGAATTATTCACTCCTTCTTGGTGGAGCTGCGGGTCTCTTTGCGTTAACTACTTGCACCTCGGCATCCATGAGAGAAAAGGATGATCCATTGAATTGGTTTCTTGGTGGTGTCGTTAGTGGATCTCT…	NA	A7SS25_NEMVE	A7SS25_NEMVE	A7SS25_NEMVE	0.001
SEQINDEX4842_C_c	CGACCTGGACAAATCAGGCGCTCTGTCCGTCGAGGAGTTTATGTCTCTTCCTGAACTACAACAGAATCCTCTAGTTCAAAGAGTTATCGATATTTTTGACACAGATGGAAATGGCGAGGTTGACTTTAAAGAATTCATAGAAGGGGTTTCACAGTTCAGTGTTAAAGGTGACAAAGAATCCAAGCTAAAATTTGCTTTTAGAATATATGACATGGACAATGATGGTTTCATTTCAAATGGAGAACTTTTCCAAGTTCTTAAGATGATGGTCGGAAACAACTTGAAAGAAACCCAGCTTCAACAAATTGTGGATAAAACTGTAATAAATGCTGACAAAGATGGTGATGGGAAAATCTCTTTTAGTGAATTTTGCGCTGTTGTTGGTAATATGGATGTTCA…	Contig3952	GGGGGTTTTTTCAGTTTGGTTTCTCGAAGCAGCTAACTTTGCAGTGAAGTTTTGATCGGCGGATTGGGAACTTAAAAGCAAATTGGGAACTTTAAAACATTCACTTACAATGGGAAACGAAGTTTCACTCCCGGGGGATATGGTGACTCATTTTGACGCAGACGAAATCAAACGGCTTGGAAAGAGATTTCGAAAACTCGACCTGGACAAATCGGGCGCTCTGTCCGTCGAGGAGTTTATGTCTCTTCCTGAACTACAACAGAATCCTCTAGTTCAAAGAGTTATCGATATTTTTGACACAGATGGAAATGGCGAGGTTGACTTTAAAGAATTCATAGAAGGGGTTTCACAGTTCAGTGTTAAAGGTGACAAAGAATCCAAGCTAAAATTTGCTTTTAG…	Calcineurin subunit B type 1 OS=Rattus norvegicus GN=Ppp3r1 PE=1 SV=2; Accession=CANB1_RAT; E-value=1.0e-62	A7RJ82_NEMVE	A7RJ82_NEMVE	A7RJ82_NEMVE	0.001
SEQINDEX36_C_c	CTGAGGGTACACCACCTTACAAGAATACCAGTTTTGATTCCATTGACAGTGGTATAGCTGGAGAATTGCCCCCAAGACTTGAGTCATTGGTTAGAGCCTCCAAACAGCACTCACTGTCCAGAGATGGATCATTTGAATATACAGACTCAACTGGAACAGATCTGCATGATTTTATTATAAAAACTTTAAAAAATCCAAGGGACCGAAAATTTCTTATGAAACTGGAACAGGACTTCCTTAATTTTATTCGTGAACCACTGATGTTTCTGCATTACCCCCCAATGACGTCATACCATCGCATGATTGTGCATCGAGTAGCAGCATACTTTGGTATGGATCACAATGTTGATCAACAAACTGGAAAATCGGTCATAATTAACAAGACAATGAATACAAGAA…	Contig6127	GGGGATGATGGATGAAAGCTTTCCCTTAGATAATGATCCAGATATGACCAACCATCAGAAAAACTGTTCCCACACTACAGTTGAAAATTCCAAAAGTCCTGTTGTTACCACAGCGGAAGTTTCCAGTGAAGAAAGCACAAAAGCAGAATCCCCTGAACAGCCTCAAGCTATTACCATGACAACCCAGGCTAAAGCATCTTTAAGTACTGTTCATGTACAGCAGAGTTTCCATGGTATCTGTACCTCAATCCCAGTCCATACTTCTGAGCCTTCTCATCAGAATGCTCGCAAAACACTGGTGAGAAGTGCTGCTGTGACATGCGTGCCATCACCCCCGCCCCCACAGTACACAGATGAGGCTGCTGAGGGTACACCACCTTACAAGAATACCAGTTTTGA…	R3H domain-containing protein 2 OS=Bos taurus GN=R3HDM2 PE=2 SV=1; Accession=R3HD2_BOVIN; E-value=2.0e-35	A7SFE7_NEMVE	A7SFE7_NEMVE	NA	0.001
SEQINDEX9306_C_c	GTGACCGATGCTATTCTCTGGTTGGACAGCGACAGCCTGGTTTCTTTGGTTTCATAGAAAGGACTCTGGCGAAAACCCAGGACCATATTTGGTTTGAGAGGACAGAAATGAAGGACAGGTTGATTGTTACGAGAAGGTTGAGGGAGCATGTTGAAGATCCTTCCAAAAACCCAATTTTGATCTTTCCGGAAGGAACCTGTATTAACAATACATCGGTAATGATGTTCAAAAAAGGCAGCTTTGAAATTGGGGGAGACGTTTATCCTGTTGCGATCAAGTACGACCCAACATTTGGAAATGCATTTTGGAACTCAAGCGTCGAGGGATTTGGAATGTACGTCTTTCTTCTTTTAACCAACTGGGCTCTGGTGTGCGATGTGTGGTATTTGCCGAAAACAA…	Contig5567	GGGGGACAGGTCCTGATGCAAAATGGCCGTCTGGTGTATTCTCTTGTCATGTTATTTGGCGGTTATCGTTATTTTTATGGCGATCCCTGCTTCACTCGGGATTTCCTTTGGAATTCGAAACCTTTACTTAGCCACGCTGTATAAAGTGTTTGAGTTTGGAAGGAAAACTATCCAGTCCAAGCAAGGCATTAGATCAAGTGTCATTGACAAGAAAACAGTGCAACCATCCCATGCTCATTTGCCAAGGAACAGATCATTTGGAACTTTCCAACGAGAATTCAGATTAGATGATATTGTTGAATTCTGTGTCAATGGGGTAGAAGCTATACTTGATGATGATGTAACCAAACGTTTCAGTGCTGAAGAATTGGAATCTTGGAATCTTCTTACCAGAACCAA…	1-acyl-sn-glycerol-3-phosphate acyltransferase theta OS=Xenopus laevis GN=agpat9 PE=2 SV=1; Accession=PLCH_XENLA; E-value=1.0e-61	A7SGS1_NEMVE	A7SGS1_NEMVE	NA	0.001
SEQINDEX12624_C_c	CGAGTTGAACACGATTTTGCCTGTTGTTGTCATTCAAAACGCGACTGTCCATGATCTGAAAAAGGCAATCCAAAGGCATATCTCCCTGAAGCTTTTGAGGGAAGGAGGTCCAAATATTGTTTCATGGAAACATGTATGGAAAACATATTGGCTGTCATTTGAAGGACAAAAACTGACTGAGGACCACCAGCCCCTTACCCACTATGGCATCCAAAGCAAAGATGAAGTTACCTTTATTAAGCGATTGAGAAGGAAATGATTCAATGTCAGTGATGATGGATTAGCCTGACACNAGTTATTATTATTGTCAGGCCAATACATCATCACCTAATCCCAGTGGCATTTATCATGACTCTGTTAAGTGTATGCAGTACATGTNTACAAGCTTTCTTTA	CCHX1022.b1_c_s	GGGGAGAAGGTTAAAATGGCCGACGAGGCTATTGACGAATCCTTGAAGGCGATGGATAAAATTGATCAGCTTTCGCACCCGGAGGTTATGGCGCTTTTCAGCAACAAACTGGCTGAAATAATGAAGGATCCTCTTCTGATTGGACTACCGAACGAACCTACACTCGACGAGGTGAACTCGCAAATTGCCCTGGAACATGGCCGTGCAATGATTGTGAATGTTCGACAACAGGACGAGTTGAACACGATTTTGCCTGTTGTGGTCATTCAAAACGCGACTGTCCATGATCTGAAAAAGGCAATCCAAAGGCATATCTCCCTGAAGCTTTTGAGGGAAGGAGGTCCAAATATTGTTTCATGGAAACATGTGTGGAAGACATATTGGCTGTCATTTGAAGGA…	U11/U12 small nuclear ribonucleoprotein 25 kDa protein OS=Mus musculus PE=1 SV=1; Accession=CP033_MOUSE; E-value=1.0e-21	A7SNX4_NEMVE	A7SNX4_NEMVE	NA	0.001
SEQINDEX9275_C_c	CGCCAAGTTCACGTTTATGTGGAGAATTTTAGTTTAGGCTGAGTTGTAAAAAAGGATATTATAAACTTATGGATCCTCCTCACAATTGACGAGTAGGTTGTGGAGGTAGTTCTCTATGTTCAGACTAAATCACTGGCAAAATGCAACACGATGAGGTGATATGGGAAGTAATAAATCCTGGATTCTGTTCTTTCAAAGTTAAGACGATATCTCAGACGTTTTGTCGCAATGCAAATAATGTGACTGGCCTATGTAACAGATCTTCCTGTCCTCTTGCTAACAGTAGATATGCTACAGTTAGGGAAAAAGATGGTGTCTGCTTTTTATACATGAAGACAATAGAGAGGGCTCATTGTCCAGCTAAGATGTGGGAAAAGATAAAACTCCCTAAAAACTATG…	Contig325	GGGGGTCCACGTTAATGTGGAGAATTTTAGTTTAGGCTGAGCTGTAAAAAAGGATATTATAAACTTAATGGATCCTCCTCACAATTGACGAGTAGGTTGTGGAGGTAGTTCTCTATGTTCAGACTAAATCACTGGCAAAATGCAACACGATGAGGTGATATGGGAAGTAATTAATCCTGGGTTCTGTTCTTTCAAAGTTAAGACGATATCTCAGACGTTTTGCCGCAATGCAAATAATGTGACTGGCCTATGTAACAGATCGTCCTGTCCTCTTGCTAACAGTAGATATGCTACAGTTAGGGAAAAAGATGGTGTCTGCTTTTTATACATGAAGACAATAGAGAGGGCTCATTGTCCAGCTAAGATGTGGGAAAAGATAAAACTCCCTAAAAACTATGA…	Protein MAK16 homolog A OS=Xenopus laevis GN=mak16-A PE=2 SV=1; Accession=MK16A_XENLA; E-value=1.0e-78	A9V8N9_MONBE	A9V8N9_MONBE	A7SK20_NEMVE	0.001
SEQINDEX10663_C_c	TAACGGCCAAGAAACACTTAAACAAGGATGTATGACGACGACGACGAGCCTGAAGGTCCAAAGAGTTCAGCCACAACTTATCTTTCCGAAGGAAACGTGCATTTTAACCAGGGCGAGTACAAGAAAGCCCTGGACAGTTACTCACAAGCCTTGGAATTACAACCAGGATACAAAGACTGTCTTGTCCAGCGATCAAAGTGCTATTTGCACCTTGGAGACACCGACTCAGCTCTCAGAGACGCAGAGGAATCGTTGACAGAAGACCCGGAGTATATTAAGGGACTTTACCAGAAAGCTGAAGCTCTTTATTCCAAGGGTGATTTTGAGCATGCCCTGGTGAACTTTCATCGTGGAGGCAAGCTGCGGCCAGATAAAGAGGAATTTAAATTGGGAATTCAG…	CCHX10093.b1_c_s	GGGAAACACTTAAACAAGGATGTATGACGACGACGACGAGCCTGAAGGTCCAAAGAGCTCAGCCACAACTTATCTTTCCGAAGGAAACGTGCATTTTAACCAGGGCGAGTACAAGAAAGCCCTGGACAGTTACTCACAAGCCTTGGAATTACAACCAGGATACAAAGACTGTCTTGTCCAGCGATCAAAGTGCTATTTGCACCTTGGAGACACCGACTCAGCTCTCAGAGACGCAGAGGAATCGTTGACAGAAGACCCCGAGTATATTAAGGGACTTTACCAGAAAGCTGAAGCTCTTTATTCCAAGGGTGATTTTGAGCATGCCCTGGTGAACTTTCATCGTGGAGGCAAGCTCCGGCCAGATAAAGAGGAATTTAAATTGGGAATTCAGAAGTCAGA…	Tetratricopeptide repeat protein 25 OS=Danio rerio GN=ttc25 PE=2 SV=1; Accession=TTC25_DANRE; E-value=1.0e-126	A7S020_NEMVE	A7S020_NEMVE	Q68BM1_ANTCR	0.001
SEQINDEX8213_C_c	TCTTTATTTCGTAAAAGTTCTCGTGTCTATCATCAGCTGATTGAAAAAATGTTGGCTGATACGGTTCTTATTCTATTTATTTCAATTGCTACGGCTTTTCTGTCTGAAGGAATTACTTACTTGCTGGTTTACAGAACAGACAAATATAAAAAGTTAACTGCAGAAGTTGAGAAGGACAGCAAAAAATTGGAAAAACGAAAAGAAACTATTTCAGATCTTCCAAGACAAGGTGGACAGAAGAAGAAAATGGAAAGAGTTGAAGAGAAGCTTAAAAATCACAATCGAGATTTGTCAATGGTGAAAATGAAGTCTATGTTTGCCATTGGATTTACATTTACAGCTCTCATTGGCATGTTTAACTCAATTTTTGATGGCCGAGTAGTAGCAAAGCTACCATTT…	Contig940	GGGGAATGATTGGCGCCTCCATCTTTATTTCGTAAAAGTTCTCGTGTCTATCATCAGCTGATTGAAAAAATGTTGGCTGATACGGTTCTTATTCTATTTATTTCAATTGCTACGGCTTTTCTGTCTGAAGGAATTACTTACTTGCTGGTTTACAGAACAGATAAATATAAAAAGTTAACTGCAGAAGTTGAGAAGGACAGCAAAAAATTGGAAAAAAGGAAAGAAACTATTTCAGATCTTCCAAGACAAGGTGGACAGAAGAAGAAAATGGAAAGAGTTGAAGAGAAGCTTAAAAATCACAATCGAGATTTGTCAATGGTGAAAATGAAGTCTATGTTTGCCATTGGATTTACATTTACAGCTCTCATTGGCATGTTTAATTCAATTTTTGATGGCCGA…	Transmembrane and coiled-coil domains protein 1 OS=Rattus norvegicus GN=Tmco1 PE=2 SV=1; Accession=TMCO1_RAT; E-value=6.0e-69	A7RN03_NEMVE	A7RN03_NEMVE	A7RN03_NEMVE	0.001
SEQINDEX20740_C_c	TAGCGGAACTCTTCGAAGAAGCCTTCAAACTCAAAATGGCTCTCAATCTTATGCATATTGAAGACAGTCTTGTTTTCCAAACTGGCCAAGATGTCATGGCAGACAACGGTGTTGTATTGTTCGGAATGAGTCCTGGAAATCCATATTTCAAATCTGCCGTTATTGGGGACTATGTGAATTTCTTGGGAGTGGAAAAGAGGCGAGTAATAGTCGTTATACCACAGCAGCCTGCAGAACACACGTATAGAGCCCTGGGTAGCAAAGATGCCGTTAAGCGCGCTAAGAAAAATTCCAGTCAACTCAAGTCCCATTGCAAGAGAGCGATTGACAAGGCGTTCAGTTCTGATCAAATGGCCGGTGAATTTTATATGTTGGACTGGACTCGCGAAGTGGATACAC…	Contig1546	GGGGGAAAACTGAGCAAGCGGAACTCTTTGAAGAAGCCTTCAAACTCAAAATGGCTCTCAATCTTATGCATATTGAAGACAGTCTTGTTTTCCAAACTGGCCAAGATGTCATGGCAGACAACGGTGTTGTATTGTTCGGAATGAGTCCTGGGAATCCATATTTCAAATCTGCCGTCATTGGAGACTATGTGAATTTCTTGGGAGTGGAAAAGAGGCGAGTGATAGTCGTTATACCACAGCAGCCTGCAGAACACACGTATAGAGCCCTGGGTAGCAAAGATGCCGTTAAGCGCGCTAAGAAAAATTCCAGTCAACTCAAGTCCCATTGCAAGAGAGCGATTGACAAGGCGTTCAGTTCTGATCAAATGGCCGGTGAATTTTATATGTTGGACTGGACTC…	NA	A7RWZ9_NEMVE	A7RWZ9_NEMVE	NA	0.001
SEQINDEX12341_C_c	GGCTCTTTTTCTCGTGGTCCTCCGCCATATTGGAAAAGCTGATTTTGGAGCGGAGCCACCATGCAGATTTTTGTGAAAACCCTGACTGGGAAAACTATCACCCTCGAGGTTGAACCCAGTGACTCAATCGAAAATGTAAAAACAAAGATCCAAGATAAGGAAGGTATTCCTCCTGATCAGCAAAGATTGATCTTTGCCGGTAAACAACTTGAGGATGGGCGAACACTGAGTGACTACAACATCCAGAAAGAATCAACCCTTCATCTTGTGCTTCGTCTCAGAGGTGGAGCCAAGAAAAGAAAGAAGAAGAACTACACCACACCAAAGAAGATCAAGCACAAGAGGAAGAAGGTCAAGTTGGCTGTGCTGAAGTACTACAAGGTTGATGAAAATGGAAAG…	Contig24	GGGGTCTCTTTTACTCGTGGTCCTCCGCCATATTGGAAAAGCTGATTTTGAAGCGGAGCCACTATGCAGATTTTTGTGAAAACCCTGACTGGGAAAACTATCACCCTCGAGGTTGAACCCAGTGACTCGATCGAAAATGTAAAAACAAAGATCCAAGATAAGGAAGGTATTCCTCCTGATCAGCAAAGATTGATCTTTGCTGGCAAACAACTTGAGGATGGACGAACACTGAGTGACTACAACATCCAGAAAGAATCAACCCTTCATCTTGTTCTTCGTCTCAGAGGTGGAGCCAAGAAAAGAAAGAAGAAGAATTACACCACACCAAAGAAGATCAAGCACAAGAGGAAGAAGGTCAAGTTGGCTGTGCTGAAGTACTACAAGGTTGATGAAAATGGA…	Ubiquitin OS=Strongylocentrotus purpuratus PE=3 SV=1; Accession=UBIQ_STRPU; E-value=2.0e-35	A7RJ25_NEMVE	A7RJ25_NEMVE	A7RJ25_NEMVE	0.001
SEQINDEX13174_C_c	AGTGACCAAGAGAAAGATGGCGTCGTCGGTGGTAAAACAAGAACTGCCTCCAAAAGGCGGTTATCCTCCAATAGAATACGCCAGAAATCTCCCTAAAAGAGGTCCATCTGGTATGATGATGTTTATTGGTGGCGCCGCTGTCATGGCTTTCGGGTTTTATCATGTTATCATGGGAAACAGAAAACGCTGTGAGCTTATGAAGGAGAAAATGAATGCAAGAATCGGAATTCTACCACTTTTGCAAGCAGAACATGATAGAAAATGCTTGAAAGCACTAAAAGAAAATGAAGAAATGGAGGCATTAATCATGAAGGATGTTCCAGGATGGACAGTGGGAGAGAGTGTGTACAACACAGAAAAGTGGATCACACCAGTGCCACTACAGGTTAAAAAGCTTTG…	Contig3656	GGGGGACCAAGAGAAAGATGGCGTCGTCGGTAGTAAAACAAGAACTGCCTCCAAAAGGCGGTTATCCTCCAATAGAATACGCCAGAAACCTGCCTAAAAGAGGTCCATCTGGTATGATGATGTTTATTGGTGGCGCCGCTGTCATGGCTTTCGGGTTTTATCATGTTATCATGGGAAACAGAAAACGCTGTGAGCTTATGAAGGAGAAAATGAATGCAAGAATCGGAATTCTACCACTTTTGCAAGCAGAACATGATAGAAAATGCTTGAAAGCACTAAAGGAAAATGAAGAAATGGAGGCATTAATCATGAAGGATGTTCCAGGGTGGACAGTGGGAGAGAGTGTGTACAACACAGAAAAGTGGATCACACCAGTGCCACTACAGGTTAAAAAGCTTT…	NADH dehydrogenase [ubiquinone] 1 alpha subcomplex subunit 13 OS=Bos taurus GN=NDUFA13 PE=1 SV=3; Accession=NDUAD_BOVIN; E-value=3.0e-33	A7S864_NEMVE	A7S864_NEMVE	NA	0.001
SEQINDEX6785_C_c	GTATTCAAGATGCCGGTGCAAGCTGCCTCTCCTAAAGAAGATCCACGAAGACCCAACAAAATATTCCGGTATAAACCAGTAACAAACAAAGCTATGGATGACCCAACTCCAGAGTATATGAATCTTTTAGGGATGATATTTAGCATGTGTGGGCTTCTTATGAAGCTTAAATGGGCTGCATGGGCAGCTGTTTACTGTTCTTTCATCACCTTTTCAAATTCACGTTCATCAGAGGACACAAAGCAGATGTTTAGCAGTTTCCTGTTATCTGTTTCTGCTGTGGTAATGTCATATCTTCAAAATCCTCAACCAATGGCTTCCACTTGGTAGTGGCATCTTAATCTGGTCTTTCAGCAGGAATACACCTTCAGCAGGGGTTAAAGTTAAAGAACATGATTA…	Contig1464	GGGGATACGTAACTCACTGTATTCAAGATGCCGGTTCAAGCTGCTTCTCCTAAAGAAGATCCACGAAGACCCAACAAAATATTCCGGTACAAACCAGTAACAAACAAAGCTATGGATGACCCAACTCCAGAGTATATGAATCTTTTAGGGATGATATTTAGCATGTGTGGGCTTCTTATGAAGCTTAAATGGGCTGCGTGGGCAGCTGTTTACTGTTCTTTCATCACCTTTTCAAATTCACGTTCATCAGAGGACACAAAGCAGATGTTTAGCAGTTTCCTGTTATCTGTTTCTGCTGTGGTAATGTCATATCTTCAAAATCCTCAACCAATGGCTTCCACTTGGTAGTGGCATCTTCATCTGGTCTTTCAGCAGGAATACACCTTCTGTAGGGGTTAA…	UPF0139 membrane protein C19orf56 homolog OS=Bos taurus PE=3 SV=1; Accession=CS056_BOVIN; E-value=3.0e-29	A7RTY3_NEMVE	A7RTY3_NEMVE	NA	0.001
SEQINDEX4782_C_c	ACAATCCATCATGGCGGTGGGTAAAAACAAGAGATTGACCAAAGGAAAGAAAGGTCTTAAAAAGAAAATCGTTGATCCTTTTGCTAAGAAAGATTGGTATGATGTCAAGGCCCCGTCCATGTTTAACATCCGGCAGATTGGCAAAACCATGGTCAACAGAAGCACTGGAACCAGAAATGCTGTGGACGGACTCAAGGGACGTGTATTTGAAGTATCACTGGCTGATCTTCAGAATGATGAGGTTGCATTCAGAAAATTTAAACTGATAGTTGAAGAAGTCCAGGCAAAGAACTGTCTGACTAACTTCCATGGCATGGACATGACAACAGACAAGCTGAGGTCACTGGTGAAGAAATGGCAGACCCTGATTGAAGCATCAGTTGACACCAAAACTACCGA…	Contig1109	GGGGCTCTTCTGCTTCTCTTCACAATCGGTCATATGGCGGTGGGTAAAAACAAGAGATTGACCAAAGGAAAGAAAGGTCTTAAAAAGAAAATCGTTGATCCTTTTGCTAAGAAAGATTGGTATGATGTCAAGGCCCCGTCCATGTTTAACATCCGGCAGATTGGCAAAACCATGGTCAATAGAAGCACTGGAACCAGAAATGCTGTTGATGGACTCAAGGGACGTGTATTTGAAGTATCACTGGCTGATCTTCAGAATGATGAGGTTGCATTCAGAAAATTTAAACTGATAGTGGAGGAAGTCCAGGCAAAGAACTGTCTGACTAACTTCCATGGCATGGACATGACAACAGACAAGCTGAGGTCACTGGTGAAAAAATGGCAGACCCTGATTGAAGCA…	40S ribosomal protein S3a OS=Homo sapiens GN=RPS3A PE=1 SV=2; Accession=RS3A_HUMAN; E-value=1.0e-95	A7S3J7_NEMVE	A7S3J7_NEMVE	A7S3J7_NEMVE	0.001
SEQINDEX14680_C_c	ATCTATGACAGAAAAGGAAAGACATCTGTATGAGGATGGGAATGGGCCACCAAAAGTGAAACGACTGAAAGTAGTAGAAGATGTCGGTATGACATCGAGTGGCTGTGATGAACAAGACACAATATATGGAGCACTGATTGTGCTGGGTTACAATGGCTCTCAAGATCTAGGTGGGGAATTCAAGCATCGTCACCGAAGCTCATATATTTTGAGAAAGAAAGCATCTCCCTCTGGAGTGCAACCATACAAAGTGCACCAGGCTTCTTCAGATACTGGAAGGCAGATTGTAAAGTCTCAAGCCCATAGTGTATCTTACACTTTATCACGTGGCAATGCAGTGGTTGTTGAATACTCAAGGGACCCCTCTACAGACATGTTTCAGATTGGACGTTCGGCTGA…	Contig4299	GGGGACGTACGGAGGATGTCGCGTGTTTGACGCGAAATTTTCCAGTTAGTACGTGGATCTATGACAGAAAAGGAAAGACATCTGTATGAGGATGGGAATGGGCCACCAAAAGTGAAACGACTGAAAGTAGTTGAAGATGTCGGTATGACATCGAGTGGCTGTGATGAACAAGACACAATATATGGAGCACTGATTGTGCTGGGTTACAATGGCTCTCAAGATCTAGGTGGTGAATTCAAGCATCGTCACCGGAGCTCGTATATTTTGAGAAAGAAAGCATCTCCCTCTGGAGTGCAACCATACAAAGTACACCAGGCTTCTTCAGATACTGGAAGGCAGATTGTAAAGTCTCAAGCCCATAGTGTATCTTACACTTTATCACGTGGCAATGCAGTGGTT…	Protein pellino homolog 2 OS=Homo sapiens GN=PELI2 PE=1 SV=1; Accession=PELI2_HUMAN; E-value=1.0e-122	A7SRC6_NEMVE	A7SRC6_NEMVE	NA	0.001
SEQINDEX16118_C_c	TTGTGTTTCAAAGCTCAAAACCCCGTGCGACAGGATCTGCTAGAGAGCATGGGAATGGCAGACAGGGGTCTAACTACTGGTGCTGTGTGTGTTTATTCTTCCCGTGTTCCAGATGCCGTAAAAACTCTCAAAGATATCCAGTCCAAAGTCCCTGTGGCTTCTGTAGCCGCCGGATTTCCAGCTGGTCAAACCCCAATCAAGCAAAGATTGGAAGAAATAGAGACTGCAGTGGCATCAGGTGCAACAGAAATAGACATTGTGATCAGTCGAGCCTTTGTACTTGAGGCTAAGTGGCAAGCACTTTATGATGAAGTAAAAGCAATGCGCAAGGCTTGTGGAGAAGCTCACCTGAAAACTATCATTGCAACAGGTGAACTGGGCTCATTGAGCAATGTATAC…	CCHX14394.b1_c_s	GGGGGAGCAATATGTCTGCCCATTTAACGCGAAACCCAGGTAGTCCCCTTGACTTGGAGTGGATTGGAAGGACACGAGTAGATCTTCCAGCCGTCAAACGACGCGCAGACACGCTAAAAACGCGGCGATCGATAAAGAAGCAGTGGCAAGCAGCGTGGCTTCTCCGTGCAGTGACTTGTATCGATCTCACAACCCTGTCCGGCGACGATACTGCGACAAACGTAGCCCGCTTGTGTTTCAAAGCTCAAAACCCCGTGCGACAGGATTTGCTAGAGAGCATGGGGATGGCAGACAGGGGACTAACTACTGGTGCTGTGTGTGTTTATTCTTCCCGTGTTCCAGATGCCGTAAAAACTCTCAAAGATATCCAGTCCAAAGTCCCCGTGGCTTCTGTAGCCG…	Putative deoxyribose-phosphate aldolase OS=Homo sapiens GN=DERA PE=1 SV=2; Accession=DEOC_HUMAN; E-value=7.0e-92	A7S9A2_NEMVE	A7S9A2_NEMVE	NA	0.001
SEQINDEX19772_C_c	CGTGCTTATACAGCGTTTAGAGGACGGGCCAGTGGAGTTATTGGGAAGATGGAACGCCTTCTTCTCGTCTTAGCTTTGACCATCAGTGGAACATTTGCGTCTTGCCGACACCCAAAACCGGGACAGTTTCTATCCAAGAAGCAGGGAATTCCTACCGTTGTAAGCAACCCATCTGCACCTGACATTGGAGTAGACAAACGCCTAGTGGCCCACATTCAGTTCAATGCTACTAAGGGAGTCGTGGTAGAAGACTCCTCCGGTTATGCCAACAATGGCATCATGCAGGACGGCGCAATTGTTGTGAACTTTCCTCAAAGCAAATGCGGAAATGCTGCCTATACCTACTGTGGAGATATTCTATTTCACGGGGATACTTTCCAGGCCAAGCCAAGAGAGGGA…	Contig534	GGGGTTGTACTGCTGAGGGAAAGCAGGTGCCGAAGGATAAATGGACTCACATCGCTGGGACCTATGACTCTGCCACTGGCAAGGCCAAAATCTACGTAAACGGCGAGCTTCGAAACATGACCATTGGTGAAGGCCTACTGTCTAGAGATTGGCTGTCACGAGCTGGAATCGGTGATCACAAAGCAGCACGTCCTCTAATGGGATTTATCGATGAGTTCAGAATTTACAACTACGCTCTTCCCAAAGCTGACATAGAAGCTCTGTCGAAAATGTGCCTTCCAGCTGGACCTGCTGGACCCCCTGCCGGTCAAGCCCCTCCAGGTCAAGCCCCTCCAATCGCAGACAGCCCCAAAGACAACGCCAACCTCGATATTCCCCAACAAGATATCGCTGCTGACA…	NA	A7S999_NEMVE	A7S999_NEMVE	NA	0.001
SEQINDEX9114_C_c	AATCAATGACACTCCTGAAATATTTGCTCTTCATGACAACGCCAACATCACCTTCGCTCAGACGAGGACATTCAGTCTTCTTCAAGGAATACTTAAGATGCAGCCACGGTCCTCCACCAGCGCCGGAGGTCCCGCGAGGAGGTGATGGAAGAAGCTGGTCGAGGCATCCTTGAAAAGGTCCCTCAGCCAATACCCNATTGCCATGGTGATAGAGAAGCATCCAGTGAGGTACGAAGAGTCAATGAACACAGTGTTGATTCAAGAGGTAATTAGATACAACAAACTCCTAGAAACTGTCAGACAGACACTCAACGATCTACTTAAAACATTGAAAGGACTGGTGGTGATGTCACAGGCTCCGGAAACAATGGCTAACAGCATCTTTAACAACTCCGTTCC…	CCHX9904.b1_c_s	GGGGGATTGAACACGGAATTCCACCAGTCTTCTGGATATCGGGATTCTTCTTCCCTCAGGGATTTCTGACTGGAACCCTTCAGAACTATGCGAGATCATCTTCTATTTCCATCGATGTCATAACGTTTGATTTTGAGGTGATGAAGAAAACAGAAGCGGAACTAACCTCTCGTCCAAGTAACGGCTGCTTTATCCGGGGTCTTTTCCTCGAAGGTGCACGATGGGATTTCGACAAACACGAGTTGACCGAGTCGCGACCGAAGGAGCTGTACACCGACATGCCAATCATTTGGTTGAAACCGACTGCAAACCGAGAAAAACCCGACAAGGGTATTTATGAATGTCCAGTATACAAGACATTAACAAGAGCTGGTACATTGTCCACAACAGGTCATTCAA…	Dynein heavy chain 1, axonemal OS=Rattus norvegicus GN=Dnah1 PE=2 SV=2; Accession=DYH1_RAT; E-value=1.0e-120	A7S0Y2_NEMVE	A7S0Y2_NEMVE	A7S0Y2_NEMVE	0.001
SEQINDEX4851_C_c	GGTAGAACTCAATGTTCAATCCACCGAAATCTTCGTGAAAAATAAGGCATCATGAACGAGGGGCTTACTCTACGTGGAACGTTAAAGGGTCACGATGGCTGGGTAACACAAATTGCCACCAATCCTCAAGATCCAGACAAGATTTTGTCCGGTTCTCGGGACAAGAAACTTATTGTCTGGAACCTGACACGTGATGAGACAAACTATGGTGTTGCATACAGAGCCCTCACAGGACACAACCATTTTGTGTCAGATGTTGTCATGTCATCTGACGGACAGTTTGCCCTTTCCGGGTCCTGGGACTCTACGTTGCGGCTGTGGGATCTTAATGCTGGAGTCACCACACGTCGATTTGTTGGTCACACAAAAGATGTTTTGAGTGTTGCATTTTCTGCAGAC…	Contig2978	GGGGATCTCTCGGTTGGCCTCTTCCTCTCTCCTCCATACCCAGAGTAGCGGTAGAACTCAATGTTCAATCCACCGAAATCTTCGTGAAAAATAAGGCATCATGAACGAGGGGCTTACTCTACGTGGAACGTTAAAGGGTCACGATGGCTGGGTAACACAAATTGCCACCAATCCTCAAGATCCAGACAAGATTTTGTCCGGTTCTCGGGACAAGAAACTTATTGTCTGGAACCTGACACGTGATGAGACAAACTATGGTGTCGCATACAGAGCCCTCACAGGACACAACCATTTTGTGTCAGATGTTGTCATGTCATCTGACGGACAGTTTGCCCTTTCCGGGTCCTGGGACTCGACGTTGCGGCTGTGGGATCTTAATGCTGGAGTCACCACACGTCG…	Guanine nucleotide-binding protein subunit beta-2-like 1 OS=Rattus norvegicus GN=Gnb2l1 PE=1 SV=3; Accession=GBLP_RAT; E-value=1.0e-154	A7S9A5_NEMVE	A7S9A5_NEMVE	A7S9A5_NEMVE	0.001
SEQINDEX10652_C_c	CTTTTGCCTGAGAGAGGCAAATGTCCAAGTTTCAAGAACTCAAAAGGGAGCTTAGTATCCTTGATAAAACGTTTGGCCCACGGCACGAACATTTCCGTGTTGAGGCCCACGGTTTGGACGAGGTGACATACCGATTTATTGCACCCGATGGCGAACATATAGTTCACTGCAATATATCTGAATCATATCCTAGCCCACCGCCTATGTGGTTCTCGGAAAGTGAAGACGCAAAAATCACTCAAATTGTGGAATCCTTGAGCTGTATTGAACCTACGTCTCCTAATCTGCTTCTTCGCTCTACAAAGCACTTGATCAAGGAACTCTGTAAATGGCAGAATATCTCTTTACCACCCTACGTAGACAGCCTAGATCTCGTACAGTTGATTCAAGAGGATGTTG…	CCHX17110.b1_c_s	GGGGATCATGTATTACTAAACATGACATTTACAGAAAAATTTCCATTTGATCCACCATTTGTGCGAGTCGTTTATCCTGTCTTAACAGCAGGTTATGTGCTGAGTGGTGGAGCTCTGTGCATGGAACTTCTTACTCCCCAGGGCTGGAGCAGTGCCTATACTATAGAAGCAGTCATTGTGCAAATTGCTGCTACACTGGTCAAAGGAAAGGCAAGAATTAACTTCCAAGATAACAAAAAGCAAGGGGTATACAGCCTTGTAAGAGCTCAACAGTCTTTTAGATCATTAGTTCAAATCCATGAAAAAAATGGATGGTACACTCCTCCCAAGCATGAAGGATGACTTTGCTTTTTCACTAAATTTCTTTGATTAATATTGCTTCTTACATTCCATCAGGAA…	Ubiquitin-conjugating enzyme E2 Q1 OS=Homo sapiens GN=UBE2Q1 PE=1 SV=1; Accession=UB2Q1_HUMAN; E-value=3.0e-99	A7SPH8_NEMVE	A7SPH8_NEMVE	NA	0.001
SEQINDEX2595_C_c	GCACGANGTTGTGTAGGTTTCGAANTTCGATTCAAGGGACTTACGCCAAGATGCAGAACGGTGGAAAACTCCCCTACAAAGTCGCCGATATCAGCCTTGCTGATTGGGGCCGAAAAGAAATGGAACTTGCTGAGAATGAAATGCCAGGTTTGATGGAAATGAGAAGCGCTATGGCCCCAGCAAGCCTTTAAAGGGAGCAAGAATAGCTGGTTGTTTACATATGACAATCCAGACTGCAGTTCTGATTGAAACTCTGACAGAATTGGGTGCTGAGGTTCAGTGGTCATCATGCAACATCTTCTCCACTCAAGACCATGCTGCTGCTGCCATAGCCAAGACTGGCGTACCTGTTTATGCATGGAAAGGAGAAACTGATGAAGAGTATATCTGGTGCATAGA…	Contig161	GGGGCTCTCCTTTTTACCTATAGTTGTGTAGGTTTTCGAAGTTCGATTCAAGTGATTTACGCCAAGATGCAGAACGGTGGAAAACTCCCCTCCAAAGTCGCTGATATCAGCCTTGCTGATTGGGGCCGAAAAGAAATGGAACTTGCTGAGAATGAAATGCCAGGTTTGATGGAGATGAGGAAGCGCTATGGCCCCAGCAAGCCTTTAAAGGGAGCAAGAATAGCTGGTTGTTTACATATGACAATCCAGACTGCAGTTCTGATTGAAACTCTGACAGAATTGGGTGCTGAGGTTCAATGGTCATCATGCAACATCTTCTCCACTCAAGACCATGCTGCTGCTGCCATAGCCAAGACTGGCGTACCTGTTTACGCATGGAAAGGAGAAACTGATGAAGAG…	Adenosylhomocysteinase OS=Dictyostelium discoideum GN=sahA PE=1 SV=2; Accession=SAHH_DICDI; E-value=1.0e-180	A7RME1_NEMVE	A7RME1_NEMVE	A7RME1_NEMVE	0.001
SEQINDEX11039_C_c	CCTTGGAGATTGACGTTATCCTAGAGTTTGCCCGGATATCCTTGGATTTTATACTGAAAGGTTCTTCGAACCTAAAGATCTTGCAAGCCGCAGCCCAAAAGCTTGGAGTTGACATCAATATCGTCAAGAACGGAATCAGTGGCTTGCAACATGTTTTTACTGAAAGTTCACGGCTCATGATTGGCGAAATAGACTTCCAAGATTCTGTGATGACGCTTGGTTTCTCCAAAGAAGTGATAAGTGCATTGTTGCAGCTTTATTTAGAAAACCGCAAAGAAGTCAGGAATATTTTGCTTGAAATGACTTTGGCAATTCCTCACTATCACGAATTGGAGTGGAGATTTGACGTAGAGCTGGCCAGCAGATCATTGCGCCACCAGACAAACCCGGTTATTATTA…	Contig2796	GGGGGAGGAAATTTCTGATTTGTGGACATTGGTTTGTTCCTGTTGCCTTTTTGTAGAATACTTTTAAATATTTACGATGCTTTTGATTCTCTCTGAAGAGCAAAAGGAACATCTGAGGTTCCTGATATCCTTGGAGATTGACGTTATCCTAGAGTTTGCCCGGATATCCTTGGATTTTATACTGAAAGGTTCTTCGAACCTAAAGATCTTGCAAGCCGCAGCCCAAAAGCTTGGAGTTGACATCAATATCGTCAAGAACGGAATCAGTGGCTTGCAACATGTTTTTACGGAAAGTTCACGGCTCATGATTGGCGAAATAGACTTCCAAGATTCTGTGATGACGCTTGGTTTCTCCAAAGAAGTGATAAGTGCATTGTTGCAACTTTATTTAGAAAACCG…	COMM domain-containing protein 2 OS=Pongo abelii GN=COMMD2 PE=2 SV=1; Accession=COMD2_PONAB; E-value=1.0e-50	Q75R54_LYMST	Q75R54_LYMST	Q75R54_LYMST	0.001
SEQINDEX2385_C_c	AAAACAAGACGGCAATTACCTATAGTCATTAAACTTACCAAAAATGTCTGGACGAGGAAAAGCAGCTAAAGGTGGAAAGAACACAAGCAAAACTAGGTCTATGAGAGCAGGTCTTCAGTTTCCTGTAGGCAGAATTCATCGTTTCCTTCGAAAAGGAAACTACGCGGAGCGTGTAGGTGCTGGAGCTCCTGTTTACCTAGCAGCAGTTTTAGAGTACCTAACAGCAGAGGTTTTAGAACTCGCAGGTAACGCCGCTCGGGACAACAAGAAATCCAGAATTATCCCTCGTCATTTGCAACTTGCTGTGCGAAACGACGAAGAACTTAACCAGCTATTACAAAACGTGACTTTAGCTGAGGGAGGTGTGCTGCCCAATATACAGGCCGTTCTACTGCCCAA…	Contig6558	GGGGAAGTCTAACAGCGTAAAATCGCAAGGACGGAGAAAACAAGACGGCAATTACCTATAGTGATTAAACTTACCAAAAATGTCTGGACGAGGAAAAGCAGCTAAAGGTGGAAAGAACACAAGCAAAACTAGGTCTATGAGAGCAGGTCTTCAGTTTCCTGTGGGCAGAATTCATCGTTTCCTTCGAAAAGGAAACTACGCGGAGCGTGTAGGTGCTGGGGCTCCTGTTTATCTAGCGGCAGTTTTAGAATACCTAACAGCAGAGGTTTTAGAACTCGCAGGTAACGCCGCTCGGGACAACAAGAAATCCAGAATTATCCCGCGTCATTTGCAACTTGCTGTGCGAAACGACGAAGAACTTAACCAGCTATTACAAAACGTGACTTTAGCTGAGGGAGG…	Late histone H2A.2.2 OS=Psammechinus miliaris PE=3 SV=2; Accession=H2A4_PSAMI; E-value=1.0e-50	A7RFQ0_NEMVE	A7RFQ0_NEMVE	A7RFQ0_NEMVE	0.001
SEQINDEX9542_C_c	TCCAAGGATATAACCCAGGCATCTTCCAAAACACAACACGCGCGGTCGCCGAGCCGCGAGTCTTCTGATATCGTTTTGTGAAGCGGTTCCTGCTCACGTTGCTTTCGCGCTATTTTTTCTTCTANTCGTATCAACCATTTGCAGAGAAGGAAAAACTAAACTCGATACATTATGGACAAATTTCAGGACCTCGAAGAAGGCCGGTGTCTTCAAGGGGGCATTAGAACGTGTGGAGGATGCAGCGAGAAGATCTTGGATCGCTTCCTTCTCCTGGCGTTGGACCAGTACTGGCACGTTAATTGCTTAAAATGTTCCTGTTGCAGTGTGAGACTAGGAGAAGTCGGGACATCTTGTTACGCTAAAGGAGGGATGATTCTCTGCAAGACCGACTATGTTAAG…	Contig767	GGGGGTCTTGGTCATTTAGGGTTTGAAGTTGATTTGATGTCTAATTGATTAGGCTTAATTCGCTGTCATATGATGAATGTTTTGAATAACGTACACTGTTACCCAAGTTGTTTTAACAAACAACCACGACTGGCTAATTCCTACTCAGTGTCACAAAGGCTGACAACAAACCGCACGAGAAAAAACACTACACTGCAGCGGTCTGCCTAACTTACGCTCTCGGCTAAAATGGACAACATCAACTCCAACAGCCGGTGTCTTCAAGGGGGCATAAGAACGTGTGGAGGATGCAGCGAAAAGATCTTGGATCGCTTCCTTCTCCTGGCGTTGGACCAGTACTGGCACGTTAATTGCTTAAAATGTTCCTGTTGCAGTGTGAGACTAGGAGAAGTCGGGACA…	LIM domain transcription factor LMO4.2 OS=Xenopus tropicalis GN=lmo4.2 PE=2 SV=1; Accession=LMO42_XENTR; E-value=5.0e-48	A7SG43_NEMVE	A7SG43_NEMVE	A7SG43_NEMVE	0.001
SEQINDEX16113_C_c	ACAAAAAATATCCCAAATTAAAGGAGGTAGATGATGTTCTTGGTGGAAAAGAAGCTTGGGAAAATGTGGATTCCACTGAAGAGCGCTGCCCCAAATGTGAACACAACAGAGCTTACTTTATGCAAATTCAAACACGATCAGCTGACGAGCCGATGACAACATTCTACAAATGCTGCAGCTGTGGACATCGATGGAGAGAATGAATCACTTCATCATGAGAACAGTAATCTTTATTTAATGATAATTTGAATGACACAAAGCTTAGCTAGTGGATTTATCTATGTTCACTTGATTCTCAGTGTGGCCTTTGCACTCCACGCTCAGTTATGCTCAGATGAAAATGCTCAAGTGAAGGAGGGACTTAAGAAATGAAGTATGGGGTGCACCCCCCTCCAAGGG…	CCHX1250.b1_c_s	GGGGATAGAAGGCTACAAAAAAAAAAATTGAACATGCTGTTGTTTTGTCCAACTTGCTCAAATGTTTTAACAGTTGAAGAAGGAACAGGACCTTCTAGATATAGATTCGCTTGTCAGACATGTCCTTATGTTTACAATATCACCAAAAAAATTTCTAGCAAAAAATATCCCAAATTAAAGGAGGTAGATGATGTTCTTGGTGGAAAAGAAGCTTGGGAAAATGTGGATTCCACTGAAGAGCGCTGCCCCAAATGTGAACACAACAGAGCTTACTTTATGCAAATTCAAACACGATCAGCCGATGAGCCAATGACAACATTCTACAAATGCTGCAGCTGTGGACATCGATGGAGAGAATGAATCACTTCATCATGAGAACAGTAATCTTTATTTAGTTAT…	DNA-directed RNA polymerase III subunit RPC10 OS=Homo sapiens GN=POLR3K PE=1 SV=2; Accession=RPC10_HUMAN; E-value=6.0e-29	A7SWZ1_NEMVE	A7SWZ1_NEMVE	NA	0.001
SEQINDEX3296_C_c	TGTGTGAACTGCGGAGCAACTTCGACTCCTCTATGGCGAAGGGACGGAGGTGGGCATTACTTGTGCAATGCCTGTGGACTCTATCATAAAATGAACGGATCAAGTCGACCGCTTATTAAGCCTAAGAGAAGATTGTCGGCTGCCCGCAGAGCTGGAACCTCTTGTGCTAATTGTCATACCACACAAACTACGTTATGGCGTCGCAACCAAAATGGTGATCCTGTGTGCAATGCTTGCGGACTTTACTGGAAACTTCACGCGGTCAACCGGCCTCTTTCTATGAAGAAGGACGGAATTCAAACCAGAAATAGAAAGGTGTCGTCGAAAAACAAGAACAAAACCAAGGGAGTGAAACAAGAACAGAAACATGGCGTCGAGGATAAGCTGATGAGCGGCCGT…	Contig1907	GGGGGGACGGAGGTGGGCATTACTTGTGCAATGCCTGCGGACTCTATCATAAAATGAACGGATCAAGTCGACCGCTTATTAAGCCTAAGAGAAGATTGTCGGCTGCCCGCAGAGCTGGAACCTCTTGTGCTAATTGTCATACCACACAAACTACGTTATGGCGTCGCAACCAAAATGGTGATCCTGTGTGCAATGCTTGCGGACTTTACTGGAAACTTCACGCGGTCAACCGGCCTCTTTCTATGAAGAAGGACGGAATTCAAACCAGAAACAGAAAGGTTTCATCGAAAAACAAGAACAAAACCAAGGGAGTGAAACAAGAACAGAAACATGGCGTCGAAGATAAGCTGATGAGCGGCCGTGACTCTATACCCAGTATGAGTCAAGGAAACGTTGTCT…	GATA-binding factor 3 OS=Xenopus laevis GN=gata3 PE=2 SV=1; Accession=GATA3_XENLA; E-value=3.0e-51	A7RFY2_NEMVE	A7RFY2_NEMVE	Q6RIA1_NEMVE	0.001
SEQINDEX13906_C_c	GCGTCGTCTTTTTGGATGGCAGCAGTGGAATCTAAAGATGATAGTGCTTCCTCTGAGCTGTCAGAGAGTCTGCATGCCAAAGATTCGAAAGTTTCTTCAAGTCCGAATCAAACTGCTTCGTGGCTCGTCGGAGATGTAGTGTGGTCGAAAATCCCAGGCCATCCATGGTGGCCTTCGATGGTTTCTTACGATCCTAACACCGCTGTTTCGTTCAAGTACAAGGGGAGAGCAAGATTTTATCATGTGCAATTTTTCGGTCAGGATCCTGTGAGAGGCTGGGTCGCTGAAAGGTCGATCTTAAAATTCGAAGGGCGACAAAACTTTGAGAATTCACTTCATGGAAAACAATTAAAGATTGCTCAAAAACGTATTTCCCTTTGGGAATCCGCTGTCAGTGTG…	Contig6282	GGGGGTGTCAACGGTTGTTCCATGAAGCGTCGAAGACTTTTGCACGCTACGAAAGAGAGATAGTTGCTTCCATTATTTTAAAACGGATGTTTTAAGTGTGTCGTCTTTTTGGATGGCAGCAGTGGAATCTAAAGATGATAGTGCTTCCTCTGAGCTGTCAGAGAGTCTGCATGCCAAAGATTCGAAAGTTTCTTCAAGTCCGAATCAAACTGCTTCGTGGCTCGTCGGAGATGTAGTATGGTCGAAAATCCCAGGCCATCCATGGTGGCCTTCGATGGTTTCTTACGATCCTAACACCGCTGTTTCGTTCAAGTACAAGGGGAGAGCAAGATTTTATCACGTGCAATTTTTCGGTCAGGATCCTGTGAGAGGCTGGGTCGCTGAAAGGTCGATCTTAAA…	Histone-lysine N-methyltransferase NSD3 OS=Mus musculus GN=Whsc1l1 PE=2 SV=2; Accession=NSD3_MOUSE; E-value=5.0e-20	Q17R02_BOVIN	Q17R02_BOVIN	NA	0.001
SEQINDEX15581_C_c	TGCACAACCCTGAGAAAATATCAGAGGCGCTACGAGTCGGTGTGGCTGCAAGTTTGAAGTCTCTGCTGAAAGATCCTGATGCTACAGTGAGACACAAAACGACTGAAGTTCTGGGTATTATAGCAGGTCATGCAGTTGGTCGAGATGCATTTCTAGATCATGATATTATTGTTCCTCTGTCGCAACTGTTTGATGACAATGTGTATCAAGCAAGAAGGAATGCGCACAAGGCAATCGAAATGTGTGTTCATATGAGTCCAGGGACTGAAGGCGTGGTTGATGCTAAACTTGTACCTGTTTTGGTCGCTAAACTCTTGAATGAGGAAGATGAAATCAAGGAGCTGATCCTGGATACTCTCCATTATTGTATGACTATAGAAACACTCTCAGCTCTTGAAA…	Contig4479	CGGAAGAGGAAGAAAATTCAGTGAACCTCATGGCTCATACTGTTATTTCTGTGAAGCTTCCTCCAAACATAGATACTACAAAGTCCAGGCTTGCTTACGGCGACCGAGAACTTCCTAAACTGAATCGTGAGCTGAACAGTTCAGAGCTGTTAACACGACAGAGGGCACTGATGTCTCTATGTGATGTGATGCACAACCCTGAGAAAATATCAGAGGCGCTACGAGTCGGTGTGGCTGCAAGTTTGAAGTCTCTGCTGAAAGATCCTGATGCTACAGTGAGACACAAAACGACTGAAGTTCTGGGTATTATAGCAGGTCATGCAGTTGGTCGAGATGCATTTCTAGATCATGATATTATTGTTCCTCTGTCGCAACTGTTTGATGACAATGTGTATCAAG…	Rhabdoid tumor deletion region protein 1 OS=Homo sapiens GN=RTDR1 PE=2 SV=1; Accession=RTDR1_HUMAN; E-value=8.0e-41	A7RPM5_NEMVE	A7RPM5_NEMVE	A7RPM5_NEMVE	0.001
SEQINDEX15357_C_c	ACAACAAGGCAGAATACATAGAAACCGCATCTGGAAATAAAGTAAGCCGTCAGTCTGTTCTGTGTGGAAGCCAAAACATAGTTTTAAACGGAAAGACCATCATTCAATCTGATTGTATTCTCCGTGGTGATCTAGCAAATGTGAGAATTGGACGGCAGTGCGTCATAAGCAAAAGAAGTGTGATTAGGCCGCCATTTAAGAAATTCAGCAAAGGAGTGGCTTTCTTTCCACTGCATATTGGAGATCATGTGATCATTGAGGAAGATTGCGTTGTTAACGCAGCACAGGTCGGCTCCTTTGTACACATTGGAAAAAACTGTGTGATTGGTCGGCGAAGTGTTCTGAAAGACTGTTGCGCCATAGCAGATAACACAGTTCTTCCTCCTGAGACTGTTGTTC…	Contig4127	GGGGAACGACGAAAGTGATGTAGTGGAAACTATCGACCTCGTAATTAGACAGTTCTCGAAAGTAAAGAGTCAGTGATGGAGCAGAAAAACCTATTTTACAACAAGGCAGAATACATCGAAACCGCATCTGGAAATAAAGTAAGCCGTCAGTCTGTTCTGTGTGGAAGCCAAAACATAGTTTTAAACGGAAAGACCATCATTCAATCTGATTGTATTCTCCGTGGTGATCTAGCAAATGTGAGAATTGGACGGCAGTGCGTCATAAGCAAAAGAAGTGTGATTAGGCCGCCATTTAAGAAATTTAGCAAAGGAGTGGCATTCTTTCCACTGCATATTGGAGATCATGTTATCATTGAGGAAGATTGCGTTGTTAACGCAGCACAGGTCGGCTCCTTTGTA…	Dynactin subunit 5 OS=Mus musculus GN=Dctn5 PE=1 SV=1; Accession=DCTN5_MOUSE; E-value=6.0e-79	A7SE03_NEMVE	A7SE03_NEMVE	NA	0.001
SEQINDEX5258_C_c	GGAAATCGCGGCTTGTAACATTGGAGGTGTATAAGAGAACATTCATGGTCATTTTAGTTCTGATTGCATAAGTGTTTTGGAACATTGTACAATGCAAACTATCAAGTGTGTAGTGGTTGGTGATGGTGCTGTTGGTAAAACTTGTTTACTTATATCCTATACAACAAACAAATTTCCAAGTGAATATGTACCAACTGTGTTTGACAATTATGCAGTGACAGTAATGATTGGCGGAGAGCCTTTTACTCTGGGATTGTTTGATACTGCAGGGCAAGAAGATTACGACAGACTGAGACCACTTTCCTACCCCCAGACAGATGTCTTCCTTGTGTGTTTTTCAGTTGTATCACCTTCTTCATTTGAAAATGTGAAAGAAAAGTGGGTACCAGAAATTACACA…	Contig4563	GGGGAACGCCCCGGCTAGTAGCGGATGTGACTGAAGTAGAAATATCACTCAGAAGATTTTGGGTTGAGGAAATCGTGGCTTGTAACATCGGAGGTGTATGAGAGAACATTCATGGTCATTTTAGTTCTGATTGCATAAGTGTTTTGGAACATTGTACAATGCAAACTATCAAGTGTGTAGTGGTTGGTGATGGTGCTGTTGGTAAAACTTGTTTACTTATATCCTATACAACAAACAAATTTCCAAGTGAATATGTACCAACTGTGTTTGACAATTATGCAGTGACAGTAATGATTGGCGGAGAGCCTTTTACTTTGGGATTGTTTGATACTGCAGGCCAAGAAGATTACGACAGGCTGAGACCACTTTCCTACCCCCAGACAGATGTCTTCTTGGTGT…	Cell division control protein 42 homolog OS=Rattus norvegicus GN=Cdc42 PE=1 SV=2; Accession=CDC42_RAT; E-value=3.0e-63	Q6TH34_DANRE	Q6TH34_DANRE	Q6TH34_DANRE	0.001
SEQINDEX13903_C_c	AAATGAAGATAAAGGAACTGAAATGTTACGCCGAGCTTGTTGTTGGAATTCCGTACAATTTACAGCGCTTACAATACCTCGATGAAGGAGATATGCTTGATGATTCAGACTTAAGGCACAATGATGTGGTTTCTGGAGCGACGATTAATTTAAAACTCTGGAGAATGTGGGAAACTCTAGTTGCGGCTGTTTGCAGAGGAGCCATTGACCAAGTCCTTAAAGAAGGTGTTACAATCGACAAAGCTTGGCAATCTCTAGATCCGGTTAGTTATAGAAACAAAGTTTCTCTAGCTAAAGAAAGGGCATCAGTTGCTCTTTTCATCGCCGCTCATCGCGGCCATATTAACTTGATTAGAACCTTGACGGAACATTCAGAAGCTGACGTAAATATGAAGACCC…	CCHX5333.b1_c_s	GGGGTAGGTGAACTGCAAATGGCAACATGGCGGCGAGGAAGAGCTAACTTGTGGATCTTATCAACAAATTACTAAGATTCTTTAAACGAAGGAGATGTCGACATTCAAGAAAACAAAGAAAGTATTGAAAACGGTACCTTTTGATATCTTCATTTACATAGCCAGTACGAGGGAAAAGTTTCTCCTGAAAAAAGTCAACGCAGAAATGAAGATAAAGGAACTGAAATGTTACGCCGAGCTTGTTGTTGGAATTCCGTACAATTTACAGCGCTTACAATACCTCGATGAAGGAGATATGCTTGATGATTCAGACTTAAGGCACAATGATGTGGTTTCTGGAGCGACGATTAATTTAAAACTGTGGAGAATGTGGGAAACTCTAGTTGCGGCTGTTTGCAG…	Ankyrin repeat domain-containing protein 60 OS=Homo sapiens GN=ANKRD60 PE=2 SV=3; Accession=ANR60_HUMAN; E-value=2.0e-31	A7SV01_NEMVE	A7SV01_NEMVE	A7SV01_NEMVE	0.001
SEQINDEX20934_C_c	AATATCAGCAGTATCTGCGTACAAAAGCTTTAAAAAAAAGCCTCAAAAGCCTCCCACGCCNTTCGGGTTCTCCGAGTTGTGTTTGTTATGTGGAACGTAAAACACTAAGACTGTTAAAAACGCAATATCTNGGGAACATTGCTTAAAACCGGTGACACTTTGGGAGTGTAGTGTAGCCGATCGTGTGATTCAACATGGCCGGGTGCGATCTTCAGCTTATATCAAACGCCTTCCAACTCGTAGATCCCAGCGACAAGGAAAGGTTCTTTACTCGCCTGAGAAAGTTAGATGTCAACAATGAAAACGAGCTGACTTCGTTTCTGAATGACTACAAGTACCGAAAAGTCATCGTCTCGGGTTTTAATCGCGATCTTGTAATAGTTGGCCGAAACGAATCCA…	Contig2141	GGGTGAAGATGTTGTGCAGATCGGTATTTTACAGGGAACCTTGTCTTTTCCGGTAGAGGGTGTGTTTGTAGGTAAGACATCAGGTCGTGTCTATGTGTGCCAAGAATGTGACGATTATCAAGAACAGTGCATTGTCTGTATTGCCTACAGTGTGGAACATTTTCTGGTCCGTGGTCCTCAGAAACTGCTGCAATACAACAAACCACAGTGCTTATTTGAGAACTGTTATGGATGTTTTGATCCTCTCATTAAAGACAGAGTGCTAAGCTCAATAGGCCTTTAGAGAGTAATTCAAGGGTCTGTAATGCAAAAATGTAATAGCTTGTAGTGAGAAAAGTAACCTCTTCCACTGGCATCAAAATTTGGACAAGCTGAGACCTCTTAACTGATTAGACCATC…	NA	A7RUA4_NEMVE	A7RUA4_NEMVE	NA	0.001
SEQINDEX20401_C_c	AGTGAGACAAAATATCGTTAATAGCAAATCTTTAATTGTAAATGATCATTTTCCAAATATGAGTTCAACGAATGTTGTATTGATTCCTTTGGATGGAAGCAAAAACAGCGAACGGGCTGTCAACTGGTATATGGAACATTTTCACTTGAAAGGTGATAGAGTGGTATTTATACATGCATTTGATCCAGTGCCCATGCAATCAGCCAAACACACGGGTGTAGACTTCAAGAATAGCTATGATGAGTGGTGTATTTTAATGCAAAAAGCACAAGACAGTGCCAGGTGTCTCTTGAAAGAATATGATGACAGATTTGCAGGACTTAAGGACAAGCTGTCATACAAGATGATTCATGACACAGGAAAACCAGGAGAAGTTATCATTGACTACAGCAAGAAAGA…	Contig6376	GGGGGCCACGTTTATGTCATGATTGACAAACCGTCAATATGAGCAGTAAGACAAAATATCGTTAATAGCAAATCTTTAATAGTAAATGATCATTTTCCAAATATGAGTTCAACGAATGTTGTTTTGATTCCTTTGGATGGAAGCAAAAACAGCGAACGGGCTGTCAACTGGTATATGGAACATTTTCACTTGAAAGGTGATAGAGTGGTATTTATACATGCATTTGATCCAGTGCCCATGCAATCAGCCAAACACACGGGTGTAGACTTCAAGAATAGCTATGATGAGTGGTGTATTTTAATGCAAAAAGCACAAGACAGTGCCAGGTGTCTCTTGAAAGAATATGATGACAGATTTGCAGGACTTAAGGACAAGCTGTCATACAAGATGATTCATGAT…	NA	A7S1B3_NEMVE	A7S1B3_NEMVE	A7S1B3_NEMVE	0.001
SEQINDEX13853_C_c	CGGCCATCTGTTTTTGATGACATGGAAGAGATCCGAAATTGGTGGGAGGTACCATCGATAGCACACTTCTGTTCGTTGTTTCGTGCTGCCTTTGGACTCACAGACTTTGAAATCGAAGATTTAGAAGATGCTCTTATTATTGACGGATCTAATGAAGATGGAAACAACCGATTTCTGGCCGATCTTCACGCAAGGCTTTTGAGGGGATTGTACCGAATAAAAGACATAACCGCTGAGAATTTTGAACCATACCTATCACAAGTGTTAAAAATACGGTGGGAAGATGAATTGGGAAGGAAAAACCCTTTGGCAGATAGAGATTACAGCAAATTGACCACAAGGGAAAAAGTAGAGATACTTCATAATCTTTGTGACTTCCGACTTGATCTAACAGATGTT…	Contig3366	GGGGGTGTCGTCATTGTACTGGTAGAGTCGGCCATCTGTTTTCGATGACATGGAAGAGATCCGAAATTGGTGGGAGGTACCATCGATAGCACACTTCTGTTCGTTGTTTCGTGCTGCCTTTGGACTCACAGACTTTGAAATCGAAGATTTAGAAGATGCTCTTATTATTGACGGATCTAATGAAGATGGAAACAACCGATTTCTGGCCGATCTTCACGCAAGGCTTTTGAGGGGATTGTACCGAATAAAAGATATAACCGCTGAGAATTTTGAACCATACCTTTCACAAGTGTTAAAAATACGGTGGGAAGATGAATTAGGAAGGAAAAACCCTTTGGCAGACAGAGATTACAGCAAATTGACCACAAGGGAAAAAGTAGAGATACTTCATAATCTTTG…	Cat eye syndrome critical region protein 2 OS=Homo sapiens GN=CECR2 PE=1 SV=2; Accession=CECR2_HUMAN; E-value=1.0e-48	A7RH53_NEMVE	A7RH53_NEMVE	NA	0.001
SEQINDEX16135_C_c	GATGTTTAGTGACGAACGTATTCCAAGATGGCGCTTCAAAACCAAAGGAAAGCAAATGTCCGATTGCCACCAGAAGTGAATAGGATTTTGTACGTCAGAAACTTGCCTTACAAGATTACGACAGAAGAAATGTATGACATATTTGGGAAATATGGAGGAATTAGGCAAATAAGACTTGGCAATACACCCGAAACAAGAGGTACAGCATTTGTTGTTTACGAAGATATATTTGATGCCAAAAATGCCTGTGACCATCTATCAGGTTTCAATGTATGCAACCGTTACCTGGTTGTCCTGTACTACCAGTCGACCAAGGCTTTCCAAAAACTGGATAAGGAAAAGAAGAGACAAGAATTGGAGAAAATGAGAGAAAAATATGGAATCAACAAAGACAAGTGA…	Contig715	GGGGAGTGACGAACGTATTCCAAGATGGCGCTTCAAAATCAAAGGAAAGCAAATGTCCGATTGCCACCAGAAGTGAATAGGATTTTGTACGTCAGAAACTTGCCTTACAAGATTACTACAGAAGAAATGTATGACATATTTGGGAAATATGGAGGAATTAGGCAAATAAGACTTGGCAATACACCAGAAACAAGAGGTACAGCATTTGTTGTTTACGAAGATATATTTGATGCCAAAAATGCCTGTGACCATCTATCAGGTTTCAATGTATGCAACCGTTACCTGGTTGTCCTGTACTACCAGTCGACCAAGGCTTTCCAAAAATTGGATAAGGAAAAGAAGAGACAAGAATTGGAGAAAATGAGAGAAAAATATGGAATCAACAAAGACAAGTGAAAA…	Pre-mRNA branch site protein p14 OS=Mus musculus GN=Sf3b14 PE=2 SV=1; Accession=PM14_MOUSE; E-value=4.0e-54	A7SI29_NEMVE	A7SI29_NEMVE	NA	0.001
SEQINDEX15232_C_c	ACGATTTCTTGGCAGAAACCTGCCGCTGAAACGCATATTTTCGCTTAAAAGCTCTCAGCACACATCTCTTTGAATTCGATATGACTGTTTAGTTGTTTGTGGGCGCCCAAGTTTAGCCGTGGTACGGATAACTTTGAGTACATTAACGACTTCGGACATTTTTACATGCCTTGTTCCGGCGTCAGTTATACTCTACAACTTCATGGCAGCACACTCTAACGTGGGCATGAAGGCTGATCCAGAAATCCTGTTTTCGAAACTAGAAAGAATTGGCAAAGGATCATTTGGCGAAGTATATAAAGGCATTGACAAAAGGACCAATGCAGTTGTGGCAATCAAAATAATTGATTTAGAAGAGGCTGAAGATGAAATTGAGGATATCCAACAAGAGATCACTGT…	Contig2199	GGGGAACACAGTCAAGAATGGCGGCGTTGGAAATAGAGGAAACAACTGGACCATTTTACGATTTCTTGGCAGAAACCTGCCGCTGAAACGCATATTTTCACTTAAAAGCTCTCAGCACACATCTCTTTGAATTCGATATGACTGTTTAGCTGTTTGTGGGCGCCCAAGTTTAGCCGTGATACGGATAACTTTGAGTGACATTAACGACTTCGGACATTTTTACATGCCTTGTTCCGGCGTCAGTTATACTCTACAACTTCATGGCAGCACACTCTAACGTGGGCATGAAGGCTGATCCAGAAATCCTGTTTTCGAAACTAGAAAGAATTGGCAAAGGATCATTTGGCGAAGTATATAAAGGCATTGACAAAAGGACCAATGCAGTTGTGGCAATCAAAA…	Serine/threonine-protein kinase MST4 OS=Homo sapiens GN=MST4 PE=1 SV=2; Accession=MST4_HUMAN; E-value=1.0e-122	A7SWI4_NEMVE	A7SWI4_NEMVE	A7SWI4_NEMVE	0.001
SEQINDEX8556_C_c	AAAGCGATAAGTTATTATGGATCCGCCCATGGGAGAGATAATCCTGATATGTATATCCAAAGAACACCAGTTCAAAAACGACATGTACCAGGTCACCATAGAGGTGCACCGTATGCAGGGTCAACTGGCCCTACACCCCTTTTTGAGGACACCAGTACAGAAAGTACCCAAGGCATGGCTGGTATGCAGACAGGATACTCTCAGTTTGCTGGAAATGAATTTTTGCAGGGTCCCATGGCAAATGCAGCTGTTGGTTATGGAGCACATATGGCTAACCAAGGAAAAGAATATGTTGAAAAACATATTGATCGTTTTGTTTCTGTTTCAAAATTGAAGTACTACTTTGCTGTGGATACATCATATGTTGTCAAAAAGCTGGGACTTTTGATTTTTCCTTAC…	Contig1767	GGGGAGGATACACAACTTCGATCTTCACGGATTGCGTTAAGGCTGCCTCCTAAAAGCGATAAGTTATTATGGATCCGCCCATGGGAGACTCTAGCTTCTGTCCTCCACAAACTGCTCCTCGCAAGCGTTCACCTTATGATGATAATCCTGATATGTATATCCAAAGAACACCAGTTCAAAAACGACATGTACCAGGTCACCATAGAGGTGCACCGTATGCAGGGTCGACTGGCCCCACACCCCTGTTTGAGGACACCAGTACAGAAAGCACCCAAGGCATGGCTGGCATGCAGACAGGATACTCTCAGTTTGCTGGAAATGAATTTTTGCAGGGTCCCATGGCAAATGCAGCTGTTGGTTATGGAGCACATATGGCTAACCAAGGAAAAGAATATGTTG…	Protein YIF1B OS=Danio rerio GN=yif1b PE=2 SV=2; Accession=YIF1B_DANRE; E-value=4.0e-82	A7RZV4_NEMVE	A7RZV4_NEMVE	A7RZV4_NEMVE	0.001
SEQINDEX80811_C_c	GTGTGACAATGACGCGTGGTGCAGTGTGCTCAACAGGNACAATGACAGCGCTTATCAATTCGCTGAAGACGGTCCCTTCAAAAGAAGTAACTGGTGAAAATCTTCTTGTTTTTCTTGGATGCCTTATTTAATCCTGACCGCTGTGATAAGAAAGGACATTCTTTGGAACACAAGTATTACGTCAACTAAGGCAACTTGAACATTCGAAGAGACCATATCCTGTTCAGGTCACATCGGAAATTTGCCCGAACACAAGAAAACAAAATGTCACGGTTAAATCTGTGAAACATGTGAGCTGCTGAAGGCGAATATGAAATACGATCCGGTCCGATTTGTGGCCGTCTTTCATGAAGTAGTAAGTTTGATCAAAGAAAACATCCCGTGACATGAACGAAACTA…	Contig1273	GGGGAATGACGCGTGGTGCACTGTGCTTAACAGGACAATGACAGCGCTTATCAATTCGCTGAAGACGGTCCCTTCAAAAGAAGTAACTGGTGAAAATCTTCTTGTTTTTCTTGGATGCCTTATTTAATCCTGACCGCTGTGATAAGAAAGGACATTCTTTGGAACACAAGTATTACGTCAACTAAAGTAACTTGTGTTATACGAGAACATTCGAAGAGACAGAATCCTGTTCAGGTCATATCGGAAATTTGCCCGAACACAAGAAAACAAAATGTCACGGTTAAATCTGTGAAACATGTGAGCGGCTGAAGGCGAATATGAAATACGATCCGGTCCGATTTGTGGCCGTCTTTCATGAAGTAGTAAGTTTGATCAAAGAAAACATCCCGTGACATGAAC…	NA	Q28WM2_DROPS	Q28WM2_DROPS	NA	0.001
SEQINDEX19350_C_c	TTCGCAGGCGAATGACAACAAAATGCCCGACGACAGAGAAATAGCTTCTCCTGTAATCAGCAACGTGAAAACCTCCATGGGGAACACAGCCCGATACTCCAGGCACAGCGTCTGCTATGAGAAACAAGCAGTTTCCGTGGACCACTTACACCAGGGACTATGTAGGAGCGACAGTTACGCCGGCCTACCCTCAAAGGATGAGGACTACCGAGCACTTACCTTCCGGTTGGCCATTTGAATCCAGTCATTACAAATCAACTTTCAGAACGCCTCAGTTGGCTTACTGCCGTCACAACGTGCAGCCTTCCTCAGTACATCGCAAAAACAACCCACATGCAGCTCTGACCGATCCATACCAATACCCAGATAAGTCCTACTTGGTGTGGAAAGATAACCCAG…	Contig182	AGTATTGAATAGGGCTTCGCGTTATTTGTGAGTGAAGTTGAAAACAAATCATTCGTGAGCGACTTCATCTATGTGGAGCACTTTCAATTCAACTTGAATTCATCGCATAGCAGCTGTTCAATTATCGAATACCAGTTTCTTCGCAGGCGAATGACAACAAAATGCCAGAGGACAGAGAAATAGCTTCTCCTGTAATCAGCAACGTGAAAAACCCTCCATGGGGAACACAGCCCGATACTCCAGGCACAGCGTCTGCTATGAGAAACAAGCAGTTTCCGTGGACTACTTACACCAGGGACTATGTAGGAGCGACAGTTACGCCGGCGTACCCTCAAAGGATGAGAACTACCGAGCACTTACCTTCCGGTTGGCCATTTGAATCCAGTCATTATAAATCAA…	NA	A7SE95_NEMVE	A7SE95_NEMVE	NA	0.001
SEQINDEX4085_C_c	AGTTGCGAAGCAAACACCAGAGTGTTGTTCGCACTTTGAGGAACAAACTTGTCAGTGCTGGACTACCTGTGGTGTATGCACCAAGCCACATCATCCCTGTGCATGTTGGTGATGCAGCAAAGTGCACCGCCATTTGCAATGAGATGCTTTCCAAGCATGGCATGTACGTGCAGTCAATCAACTATCCCACAGTGGNACGTGGAAAAGAACGCCTGCGTATCGCTCCTACTCCCAAGCACGACGAGGCAATGATGGACAAGTTCACTGATGCTCTCGTCCAGGCGTGGAAGAACCAAGGCATGGAATTCTTGACTCCTGTGTGCACTGCAGAATGTGACTGCCAGGATCGCTGTGTCACTTACAAGGAGCTGGAATGCAACAAGTATGCGTCCCAGGTCT…	Contig4639	GGGGGAAAAGACACTGGCACAACTGCATAACAAGGAAGCTGCCTTATTATTTACCTCCTGCTATGTAGCTAATGATACCACACTGTTTACATTGGCACGACAGTTACCAGGTTGCCTTATTTTCTCTGATGCTGGAAACCATGCTTCAATGATTCAAGGCATACGAAACAGCGGAGCAAAGAAGTACATCCTTCGTCATAATGACGTGGAACATCTGGAGCAGTTGTTGCAGCAAGCAGACCCTGATGTCCCCAAGATCGTGGCCTTTGAAACTGTGCATTCCATGACAGGCGATGTGTGTCCATTGGAAGAGCTGTGCGATGTTGCGCACAAGTATGGAGCTCTGACGTTTGTGGATGAGGTCCATGCTGTTGGTCTGTACGGTCACAGTGGTGCAGG…	5-aminolevulinate synthase, nonspecific, mitochondrial OS=Opsanus tau GN=alas1 PE=2 SV=1; Accession=HEM1_OPSTA; E-value=3.0e-30	A7RQQ4_NEMVE	A7RQQ4_NEMVE	A7RQQ4_NEMVE	0.001
SEQINDEX1326_C_c	CTCACTCATCGTGACTGATCTCTCCCTCTTCCGAATCTGTTTTTTCACGATGGCTACTAAATCGCGTCCTCAGGCAGGATCGTCGCCTTACAGCGAGTACATAAGCAAGGCGGAAGATATTGCCGATCAAATCCTTCGAAATGGCAAGCATATCTTGCCGCATTTCGCCCGATTCTGTCTTATCTCCACGTTCTTTGAGGATGGCTTTCGAATGTGGTTCCAATGGGACGAACAGCGTGACTACATGGACCAGACGTGGCACTGTGGCAAAGTTATCGGCACTATGTTTGTCCTGTTTAATTTACTAGCGCAGCTCGCGGGATGTGTGATGGTTTTATCGAGGCAGAAAGTTGAAATTGCTGTGGGCATTTTGGGATCAGTTATTGTTGTTCAAACTTT…	CCHX8782.b1_c_s	GGGGGGACTTCAAGTTCTTGCTCAGGAATTTGGCTCTTGCTGGTGCCTTGCTTCTTCTCCTTGCTGAATCACGTTCCGAGCAGAAAAGTCTCTTTGCAGGAGTGCCAAGCATTGGAGGGAACACGCCAAAGACATACCTTCAGCTCACTGGTCGAGTCCTCCTTGGTTTCATGTTTGCGACCCTTATCAAGTTTAGGCTTTCTTTCGTCTATGTTCTTCAGGACGTTGCAGGTACAATTTTGATGGTCTTAGTTGCAGTGGGATACAAAACCAAGCTTGCATCTTTGGTGTTAGTTCTTTTGCTCACCATTATCAATATCTATCTGAATCCATGGTGGACCTACCATGCTCAGTCTCCATTAAGAGATTTCCTCAAGTACGACTTCTTCCAGACAACAT…	Surfeit locus protein 4 homolog OS=Drosophila melanogaster GN=Surf4 PE=2 SV=1; Accession=SURF4_DROME; E-value=1.0e-78	A7RWB5_NEMVE	A7RWB5_NEMVE	NA	0.001
SEQINDEX5775_C_c	TCTCCAAAATGGCGTCCGCTACAAAAGCAATACAAGTTCTTCGGAACTTTCTAATGGGGAAAACGCTTAAAGTTCCTTTGAGGTATCCATATGATCAAGTTTCAAGGACGCAACCACTTCCTAATATCCCTGATGGACCAGCTCACAAGCTGAGCCACAATTACTATTGTGACAGAGATTTGCGGCGAGCCTCCAAGCCTCCTGTCATTCTGTATGGTTCGCAGAAGTTGTTGCAAGGATCATCCGAAGAAGGTGAACAGGGAAAGTTACCAGCTTCAAAGACTCCAGGGAAAGTTTTCATTCCTGTGGATGAATGACTGTTGCTTTAAGAGTAAATTTCTTGCATAACTTAAAAAATGTACAAAATATTAATTTGGGCAAGCTCATAAAACATTTACCT	CAOI401.b2_c_s	GGGGGATTATCTCCAAAATGGCGTCCGCTACAAAGGCAATACAAGTTCTTCGGAACTTTCTTATGGGGAAAACGCTTAAAGTTCCTTTGAGGTACCCATATGATCAAGTTTCAAGGACGCAACCACTTCCTAATATCCCTGATGGACCAGCTCACAAGCTGAGCCACAATTACTATTGTGACAGAGATTTGCGGCGAGCCTCCAAGCCTCCTGTCATTCTGTATGGTTCGCAGAAGTTGTTGCAAGGATCATCTGAAGAAGGTGAACAGGGAAAGTTACCGGCTTCAAAGACTCCAGGGAAAGTTTTCATTCCGGTGGATGAATGACTGTTGCTTTAAGAGTAAATTTCTCGCATAACTTAAAAAATGTACAAAATATTAATTTGGGCAAACTCATAAA…	NADH dehydrogenase [ubiquinone] 1 alpha subcomplex subunit 7 OS=Pongo abelii GN=NDUFA7 PE=3 SV=3; Accession=NDUA7_PONAB; E-value=2.0e-16	A7SB58_NEMVE	A7SB58_NEMVE	NA	0.001
SEQINDEX6660_C_c	CTAACGTTATTCGAGAGAAACTTAGAAAAACTCGTTGACAACATTTTGGAAGAGGTCGAAAAGCGAGATAAGCGATTTCAAGCCACGCTTATTCAAAGTGGAAGTGTATATGAAGGAGTCAAGGTCTATAGACCCGACGAATTCGACTTCATGATTCGAATCAACTCGCTCTCGAACAAGCCATCATTCCATCCTTGTGACAAAGGCGAAGGATTCGTGAAGATGACACTGGAAGACAACGGCTGGATAGAATTCAAAGACGAACGAGGCTTCTATAGCCCGAACAAGTTGTCACGCCATTTCAAGAAGCTTATCAATGAAGTGTTGGGTGAAACTAAAGTGCCTGAAGGATTGGCAATCAAGACAGCAGGTGACGATCTGCTAGAAGGACCATGGGGT…	CCHX15351.b1_c_s	GGGGTACTTCACATAGCTTCACATCGCTTGCAACTCAATTTGAGTTCCCCGCTGCAACGAAGTTGCATACTGACTGAGGCGAAACTGGTGCCAAAGCAGAGTGAAATGTCTCGGGCGGCAGCAAAGAAAAACAGAAGTGGTCAGTTGTTTGACAACAACAGCAACGAGATGCCAGACCCTCACCTTTTGAGTCCGAATTCATCGATGCGAAACTTGGATGTGTCTTCTGCCTCGGACAACGAGTCTTGGGCGTCTGAAGACTCATATCCCGAAGAACTGACATCTCCACCGATTCAGTGGAAATCTGAAATTCCTTGGACACCGGATCGCCGCTGAAGCTCCATCAAAAAGCCACAATTTCAGCTTGATCCGGTGGCTGTTCAGCTGAACGAATTCTAC…	Protein mab-21-like OS=Drosophila pseudoobscura GN=GA18415 PE=3 SV=1; Accession=MB21L_DROPS; E-value=4.0e-09	A7SLQ5_NEMVE	A7SLQ5_NEMVE	NA	0.001
SEQINDEX65661_C_c	CTAGAAGTGATGGATATCTCAGTAGGCGATACAATGATGACTATGATGATTGGAGTCACAGCAGAAGTCGACCAAGAGGCCATAAGGAAAGGAGCTTTGAATCAAAGCGTGTTCGTTTCCATGATGAGGATGATTTAGATGATGGCTCTTGGGTGATGCCACGGCGGAGACTTGACTATTTTGATGACGATGAAGATGAAGATAAACTTCAAGAATCGGCTCGTAGGAAGGGGAAGAGGTCACAGCGACGAAACAGTGCTCATTTACCAGAAAGAGATCTTCTNAAAGATGAGACTTTACAAAGAAGCAAGACAGATAGTNGCATCCGATCTCAATCAGCACCCTTAGAAAGNACAGGACTTCTAGGTGTGCTAGGTTCTGAGGAATCAAAAAGTGTAC…	Contig6174	GGGGATGGATATCTCAGTAGGCGATACAATGATGACTATGATGATTGGAGTCACAGCAGAAGTCGACCAAGAGGCCATAAGGAAAGGAGCTTTGAATCAAAGCGTGTTCGTTTTCATGATGAGGATGATTTAGATGATGGTTCTTGGGTGATGCCACGGCGGAGACTTGACTATTTTGATGACGATGAAGATGAAGATAAACTTCAAGAATCGGCGCGTAGGAAGGGGAAGAGGTCACAGCGACGAAACAGTGCTCATTTACCAGAAAGAGATCTTCCGAAAGATGAGACTTTACAAAGAAGCAAGACAGATAGCAGCATCCGATCTCAGTCAGCACCTTTAGAAAGCACAGGACTTCTAGGTGTGCTAGGTTCTGAGGAATCAAAAAGTGTACAAGCA…	NA	A7S9G9_NEMVE	A7S9G9_NEMVE	NA	0.001
SEQINDEX3148_C_c	ATGGGTCATGTAATATTTCCTACTTACCCACCACCCCCGGAGAATACACAGTTCATATCCGGTTTGCAGATGAAGATATCCCAGGAAGCCCCTTCAAGGTGATCGTATCTCCAGAAGTTGAAGATCGTTTCAGGGATCTCAATGTGTCCGATCTCGCGGAAAGTGGATTGAAAGTAAACCAGCCAGCTTCCTTCTCTGTCCAGACCAACGCAGCTGTTGGTGACGTCACTGCTTCAGTAATTGCACCTTCAGGAGAAGAGAAAGAAGCCCAAGTCTCTAAACTGGGTGGTGGAAACTTTGCAATCCGATTCACCCCTAGGGAATTCGGTGATCATCTAGTCAACGTTCGCTTCGACGGTTCCATATCCCTGGTAGTCCATTTAAGATCCGAGTTGGCGG…	Contig951	GGGGTCTCTAAACTGGGTGGTGGCAACTTTGCAATCCGATTCACCCCTAGGGAATTCGGTGATCATCTAGTCAACGTTCGCTTCGACGGTTCCCATATCCCTGGTAGTCCATTTAAGATCCGAGTTGGCGGTGCGGAAGGTCATCCAGAGAAAGTCAAAGCTTATGGGTCTGGTCTAAGTAGCGGAATTGTTGGAGAACCCGCTGAGTTCACTGTTAATGCACTGGAAGCCGGCTCTGGAGCTCTAGCCCTCTCAGTGGACGGACCTGCAAAGGTCAAGATGAACTGCAGTGAAAACGCTGACGGAACATATCAAGTCACATTTAACCCAGCGGTAGCCGGAGAATACACCATAAGAATCAAATTTGCGGGTCAGGATATCCCAGGAAGCCCGTACAAT…	Filamin-A OS=Homo sapiens GN=FLNA PE=1 SV=4; Accession=FLNA_HUMAN; E-value=1.0e-73	A7RNL3_NEMVE	A7RNL3_NEMVE	NA	0.001
SEQINDEX4705_C_c	GGCTTCCTTCCATCTCGTGGCCGCGAGAAGCTTCATTCTTTGAGAATAAGAAGTTCATCCAGGCGGTGAAAAACAAAAATGGTGTCCTCCAAGAAACAGAAAAAAGCATTGGAGAGCATAAACTCTCGGCTTGCACTTGTGATGAAGAGTGGAAAGTACACACTGGGATACAAGTCGACTCTCAAAACATTACGGCAAGGCAAAGCGAAGCTAGTAATTATCTCCAGTAATACCCCCCAGCTTAGGAAAAGTGAGATTGAGTATTATGCCATGTTGGCCAAAACTGGAGTCCACCATTACAGTGGTAATAACATTGAACTTGGCACAGCGTGTGGAAAGTTCTTCCGTGTATCAGTCCTTAGTGTAACTGATCCTGGTGATTCAGACATCATTCGGTCC…	Contig4569	GGGGACCACGGAATTGTGGGTTAATTTTCTTTCCTTCCATCTCGTGGCCGCGAGAAGCTTCATTCTCTGTGAGCAAGAAGTTTATTCAGGCGGTGAAAAGACAAAAATGGTATCCTCCAAGAAACAGAAAAAAGCATTGGAGAGTATAAACTCTCGGCTTGCACTAGTGATGAAGAGTGGAAAGTACACACTGGGATACAAGTCGACTCTCAAAACATTACGGCAAGGCAAAGCGAAGCTAGTAATTATCTCCAGTAATACCCCCCAGCTTAGGAAAAGTGAGATTGAGTATTATGCCATGTTGGCCAAAACTGGAGTCCACCATTACAGTGGTAATAACATTGAACTTGGCACAGCGTGTGGAAAGTTCTTCCGTGTATCAGTCCTTAGTGTGACTGA…	60S ribosomal protein L30 OS=Branchiostoma belcheri GN=RPL30 PE=3 SV=1; Accession=RL30_BRABE; E-value=1.0e-43	A7RQD8_NEMVE	A7RQD8_NEMVE	NA	0.001
SEQINDEX5979_C_c	GATGAGTTTTTCATCAGTGGGGAAGAAAGGATTCCCCAATCACAGTCTCACACCGACCAATTTCAAAGAGATGCTTACCATGAAGATGTCCTCGTGCCTTCAGAAACTCGTGAGCCCTGGGTTATGGTTGATTATCCCACTGTATCACAGAAGGAAAATGGTGCCCCTTCTCAGGATGAGATGAGGATCCTGGAGACTGAGATGGTAAATGACAATAATTTTATTGCAGAGGTACAACAAGAAGCAGATGAATCAGTGTATCCCAATGATGTGGAAAGTGCAGATGTAGAAGAGGCAGAGGACACACCTGCTGTTGAAACCAAAGAGAAGAGAAAGAAAAAGAAGAAGAAGAAACGAAAGAAGAGAATTGAGTTTGTTCAAGATCAACCGGTGGCTGTT…	Contig2672	GGGGGTGAACTTTACTATGAGGGAAAGGAGTTTGAAACAAGACTGAAAGAGAAAAAACCGGGTGACTTGTCCGATGACCTTAGAACAGCTCTTGGTATGCCTATTGGTCCAAACAGCCAGCTGGTACCTCCGCCCTGGCTGATAGCTATGCAGAGATACGGCCCTCCGCCCTCATACCCCAATCTCAAGATACCTGGACTAAATGCACCCATTCCTGAGGGTGCGTCGTTTGGTTACCATGCCGGTGGGTGGGGCAAACCCCCTGTGGATGAGCAGGGGAAGCCCCTCTATGGTGACGTATTTGGCATTCAACAGCAGGAGGCGCCGGTCTTGGAGGAAGATGAACAGATTGAAAGACAACCCTGGGGCGAGTTGGAGTCCGAGTCAGAAGAGGAGTCT…	Splicing factor 3B subunit 2 OS=Homo sapiens GN=SF3B2 PE=1 SV=1; Accession=SF3B2_HUMAN; E-value=1.0e-178	A7S7W8_NEMVE	A7S7W8_NEMVE	NA	0.001
SEQINDEX4656_C_c	CAAACATGGATGAAATGACTAAATATCACTCAGATGATTACATCAAGTTCCTAAAGACAATTCGACCGGACAATATTTCGGAATATTCAAAGCAAATGCAAAGATTCAATGTTGGAGAGGATTGCCCAGTATTTGATGGCTTGTTTGAGTTCTGTCAGTTATCAACTGGTGGTTCCATTGCGGGAGCAGTAAAACTCAATAAACAACAGACAGATGTTGCCATCAACTGGGCTGGTGGTTTACATCATGCTAAGAAATCTGAAGCGTCAGGATTCTGCTATGTTAATGACATTGTTCTGGCCATTCTTGAGTTGTTGAAGTACCATCAGCGTGTTTTGTACATTGATATTGACATTCACCATGGTGATGGTGTGGAGGAGGCATTCTATACCACAGATC…	Contig2546	GGGAAAGCAAATGCAAAGATTCAATGTTGGAGAGGATTGCCCAGTATTTGATGGCTTGTTTGAATTCTGTCAGTTATCAACTGGTGGTTCCATTGCGGGAGCAGTAAAACTCAATAAACAACAGACAGATGTTGCCATCAACTGGGCTGGTGGTTTGCATCATGCTAAGAAATCTGAAGCGTCAGGATTCTGCTACGTTAATGACATTGTTCTGGCCATTCTTGAGTTGTTGAAGTACCATCAGCGTGTTTTGTACATTGATATTGACATTCACCATGGTGATGGTGTGGAGGAGGCATTCTACACCACAGATCGTGTCATGACAGTGTCGTTCCATAAATATGGTGAATATTTTCCTGGAACTGGTGATTTAAGGGATATTGGAGCTGGGAAAGGAAA…	Histone deacetylase 1 OS=Gallus gallus GN=HDAC1 PE=2 SV=1; Accession=HDAC1_CHICK; E-value=0.0e+00	A7RFA3_NEMVE	A7RFA3_NEMVE	NA	0.001
SEQINDEX3895_C_c	CAAAGATGCCATGCGATGGACAGANCTGTTACAACTCAAATTAACTCCGACCAGATACAAGTTTCACACTCGTTCAGGACCACTCTTTAGTGGAGAATATGAGATGCAAGATCCCAAATCTCCAGATGAAGTCGTAAACGTGACTTTCATCGATCGTGGTGGAAATCCAATAGCAGTGAAAGGGAAAGTGGGTGATAACTTATTGTATTTGGCGCACCGTTATGGAATTGAAATGGAAGGAGCTTGTGAGGCTTCATTGGCTTGTTCTACATGTCATGTGTATGTGAAAGAAGACTATTTTGACCAGCTTCCAGAACCAGACGAGAAGGAAGATGATATGTTAGATATGGCTCCGTTTCTTCAAGAAAACTCACGATTAGGATGTCAGATCATTTTGGC…	CCHX1886.b1_c_s	GGGGACCAGTCCTTTCTCTATTTTCAAGATGGTGGTTCGCGAAGATAAAGCTCGTGAAGAGGACAACTATTAAACTGGTTTATGTCACAGCAATGTTTTGCGCAGAAACGCTGTGCCATAATGACGCTGCTTCAAAGAAGTTCACTGTTATTACCAAAAGTCAAGGACGCCATGCGATGGACAGCTCTGTTACAACTCAAATTAACTCCGACGAGATACAAGTTTCACACGCGTTCAGGACCACTCTTTAGTGGAGAATATGAGATGCAAGATCCCAAATCTCCAGATGAAGTCGTCAACGTGACTTTCATCGATCGTGGTGGAAATCCAATAGCAGTGAAAGGGAAAGTGGGTGATAACTTATTGTATTTGGCGCACCGTTATGGAATTGAAATGGAA…	Adrenodoxin-like protein, mitochondrial OS=Drosophila melanogaster GN=Fdxh PE=2 SV=3; Accession=ADXH_DROME; E-value=4.0e-54	Q7PTB2_ANOGA	Q7PTB2_ANOGA	Q7PTB2_ANOGA	0.001
SEQINDEX8545_C_c	AATGATGACAGAATCAAGTCAGGTTTAGATTTCTTGTATGATGCTCCCCCAGGATTCAACAAAGAGAAAAAGATTGAGGAAGAAGAAGGTGAAGTGAGATTTGAATGGCAAAGAGGAGCTCCTAGAGAAGCATATGCCAAGAGTTTAGGGATTGAAGCTAGAGATCAACCATTTGGAATTGCTGTGCGTAATGTAAAGTGCATAAGATGTGGAAAGTGGGGACACATCAACACTGATAGAGAGTGTCCACTGTTTAACAAGAGTAAAAATGCAAGTGTTGATCCAAGTCTGATGACAGACATAGCTGACCCAATGAGACTTTTGAAAGATATGCAAACTGAGGGATTAACATTGAAACAGAATGTATTGGGACGAGTGTTTGATCCTAAGGATCCAAAC…	Contig6547	GGGGGAGGACGAGATACAAAATGGCGGTCAAAAAGCATTTTCCCGTGCTTGATCTTTCGAACTAAAAGCTCTTTCTGGGTCTCCCTTTTTTCGAGTTACAAGTCTTTGTTGGGGCATTTGTAAACGTAAACATGTTTGCCAAATTTATGAATAAGAAGGATTTTCATCCTGGCTCCAAGGCTAACATTAAGAGGGTATGGATGGCAGAGCAAAAAATACTTGCAGCTCAACAGAAAGAAAAAGAACTCGAACTCCAGTACAACAAGGAGCAAGAGAGATCTAAAAACAGGCAGGCTATTAGTAACGATGACAGAATCAAGTCTGGTTTAGATTTCTTGTATGATGCTCCCCCAGGATTCAACAAAGAGAAAAAGATTGAGGAAGAAGAAGGTGAAGTGA…	CBF1-interacting corepressor OS=Rattus norvegicus GN=Cir PE=2 SV=1; Accession=CIR_RAT; E-value=9.0e-34	A7SG80_NEMVE	A7SG80_NEMVE	NA	0.001
SEQINDEX4817_C_c	ATGAAAGGATTTACGTGAAGCTCAGAAATGATAGAGAACTAAGGGGAAAACTTCATGCTTATGACCAGCATCTCAACATGATTTTAAGTGAAGTTGAGGAAACCATTACCACTGTTGAAATAGACGAAGAAACATTTGAAGAACTATTCAAGACAACAAAAAGGAACATACCTATGCTGTTTGTCAGAGGAGATAGTGTCATTTTAGTTTCTCCACCATTACGTGTTGGGCTATGAAGTGAAAACGTCAGATTAACATGTCTTGTTCTCTCCATGTTTCAAAGGATCGCAACAAATAATTATGGTCTCAAAAGAAACCTTTGTGTATGTTATAGTTTGTTAAGTCTGCTGTTTTTGTAGCAAATTTCAAGCACCAACCACACTCAGATCAAGTAGCCTT…	Contig4097	GGGGAATCACAAGATGGCGGAAGAAGAGGTAACAAAAACTGTTTAAGAACCGCTTGATCTGATTCGTCTCAGTCTCGATGAAAGGATTTACGTGAAGCTCAGAAATGATAGAGAACTAAGGGGAAAACTTCACGCTTATGACCAGCATCTCAACATGATTTTAAGCGAAGTTGAGGAAACCATTACCACTGTGGAAATAGACGAAGAAACATTTGAAGAACTATTCAAGACAACAAAAAGGAACATTCCTATGCTGTTTGTGAGAGGAGATAGTGTCATTTTAGTTTCTCCACCATTACGTGTTGGGCTATGAAGTGAAAACGTCAGATTAACATGTCTTGTTTTCTCCATGTTTCCAAGAATCAGAACAAATAATTATGGTCTCAAAAGAAATCTTTG…	U6 snRNA-associated Sm-like protein LSm3 OS=Mus musculus GN=Lsm3 PE=2 SV=2; Accession=LSM3_MOUSE; E-value=6.0e-19	A9JSD0_XENTR	A9JSD0_XENTR	A9JSD0_XENTR	0.001
SEQINDEX4868_C_c	ATTGTTAAAGGAGTCGGAGCTGACTGTTCTTTCGGTGGTTGGGAAGGTTGAGTCGGAATCGTTGTTCTTGTCTCAAGTTTTCTTGTACAGATTAAGTGAAAGCGTCTTTGAATATCAAACATCAAAATGTCTGCCTCTTTGAGTCCAGAACAACTGAAAGAATTCAGAGATGCCTTCAAAATCTTTGATGTTGACAACAGTGAAACCATCACGACTGAAGAGTTATTGCTCGTCATGAAGAACTTGGGAATGATGGCGACGAAGGAGGAAGTCAGAGAGATGTTGTCAGAAGTCGATGAAGATGGGAGTGGAGAAATCGACTTTGAGGAGTTTGCGGAGCTCATGGTCAAACAGATGAAACAAGGAAGCGAGCAAGAGGTGAGGGAGGCATTCAAGGCG…	Contig4508	GGGGAGCTTGAAACACAATAAGTTAAAAGACGGCAGGGAATTTATATTGTCATTGTTAAAGGAGTCGGAGCTGACTGTTCTTTCGGCTGTTGGGAAGGTTGAGTCGGAATCGTTGTTCTTGTCTCAAGTTTTCTTGTACAGATTAAGTGAAAGCGTCTTTGAATATCAAACATCAAAATGTCGGCCTCCTTGAGTCCAGAACAACTGAAAGAATTCAGAGATGCCTTCAAAATCTTTGATGTTGACAACAGTGAAACCATCACGACTGAAGAGTTATTGCTCGTCATGAAGAACTTGGGAATGATGGCGACGAAGGAGGAAGTCAGAGAAATGTTGTCAGAAGTCGATGAAGATGGGAGCGGAGAAATCGACTTTGAGGAGTTTGCAGAGCTCATGGTC…	Calmodulin OS=Trypanosoma brucei gambiense PE=3 SV=2; Accession=CALM_TRYBG; E-value=1.0e-23	B6U6F8_MAIZE	B6U6F8_MAIZE	NA	0.001
SEQINDEX4052_C_c	CAGCAATCAGGTCCATNCTAAGCAAAGTAAGAACGGATTTTCCCTCGGTTGACATTAAGAGGCACATGTCAATTCAAAACTTACAAACATACGACCCTTGGGCAGATGCTTGTAAGGGTGCTGACGAGGTAACAAAACAAGATCAGCCCGTACACATTCGTATTCAGCAACGTAATGGCCGAAAGACTCTCACAACGGTACAAGGCATAGTCGACGACTACGACAAAAAGAAGCTTGTAAAAGTGTTTAAAAAGAAATTTTCCTGCAATGGAACTGTCATCGAAAATGAAGAGTATGGAGAGGTCATACAGCTGCAAGGAGATCAGAGAACAAACATTAGCAGCTTTCTTGAGAGTATTGGATTGGCAAAGAAGGAGCAGTTGCATGTCCATGGCTTCT…	Contig1445	GGGGGCGCTCCGTCGATCCTTCCAAGCGACGACATTACTGTTGTGAGGGTAATCCTCAGCAATCACGTCGATCCAAGCAAAGTAAGAACGGATTTTCCCTCGGTTGACATTAAGAGGTCCACATGTCAATTCAAAACTTACAAACATACGACCCTTGGGCAGATGCTTGTAAGGGTGCTGACGAGGTAACAAAACAAGATCAGCCCGTACACATTCGTATTCAGCAACGGAATGGCCGGAAGACTCTCACTACTGTACAAGGCATAGTCGACGACTACGACAAAAAGAAGCTTGTAAAAGTGTTTAAAAAGAAATTTTCCTGCAATGGAACTGTCATCGAAAATGAAGAGTATGGAGAGGTCATACAGCTACAAGGAGATCAGCGAACAAACATTAGCA…	Eukaryotic translation initiation factor 1b OS=Sus scrofa GN=EIF1B PE=3 SV=1; Accession=EIF1B_PIG; E-value=1.0e-31	Q2HYN5_ICTPU	Q2HYN5_ICTPU	NA	0.001
SEQINDEX4826_C_c	GGAACAAATATGGCGGCTACCGAAACGGCGAGAGAAAAGGCTTTGGCCAATTACAGGAAGAAGCTGTTAGAGCACAGAGAGTTAGATGCACGCCTGAAAGAAATGAGGGAACAACTGAAAGATTTGAGTAAGGAGTATGACAAATCCGAAAATGATTTGAAAGCTCTTCAAAGTGTTGGTCAGATTGTTGGTGAAATTCTTCGTCAACTTACTGAAGAAAAATTTATTGTAAAGGCAACCAACGGGCCTCGTTATGTTGTAGGCTGCAGAAGACAGGTGGATAAAAAGAAACTGAAGCAGGGAACACGTGTGGCCCTTGATATGACAACTCTGACCATAATGAGATATCTGCCTCGTGAAGTTGATCCTCTTGTCTACAACATGTCACATGAGGATCCT…	Contig46	GGGGGCCTAGTCACGGGACAAATATGGCCACCGAAACGGCGAGAGAAAAGGCTTTGGTCAATTACAGGAAAAAGCTGTTAGAGCACAGAGAGTTAGATGCACGCCTGAAAGAAATGAGGGAACAACTGAAAGATTTGAGTAAGGAGTATGACAAATCCGAAAATGATTTGAAAGCTCTTCAAAGTGTTGGTCAGATTGTTGGTGAAATTCTTCGTCAACTAACTGAAGAAAAATTTATTGTAAAGGCAACCAACGGGCCTCGTTATGTTGTAGGCTGCAGAAGACAGGTGGATAAAAAGAAACTGAAGCAGGGAACACGTGTGGCCCTTGATATGACAACTCTGACCATAATGAGATATCTGCCTCGTGAAGTTGATCCTCTTGTCTACAACATGTCAC…	26S protease regulatory subunit S10B OS=Spermophilus tridecemlineatus GN=PSMC6 PE=2 SV=1; Accession=PRS10_SPETR; E-value=0.0e+00	A7SQ60_NEMVE	A7SQ60_NEMVE	A7SQ60_NEMVE	0.0481
SEQINDEX13653_C_c	TTTGGAAGTTACAGTGTCGTGGGATCGTTCCCAAAAGATTTCGGTTATGGACCAGAAGATCAAGATGAGCTTGCAAGCAGTGATAACAAACCCAGAATTCTATTACTGGGTCTTCGAAGGAGTGGCAAATCCTCAATTCAGAAAGTGGTTTTCCACAAGATGTCCCCTAATGAAACTCTTTTCTTAGAAAGCACAAATAAAATAGTAAAAGATGATATTTCAAATAGCTCATTTGTGCAGTTTCAGATATGGGATTTTCCAGGTCAGATTGATTTCTTTGATCCAGCTTTTGATTCTGAAGTGCTATTTGGACACTGCGGAGCGCTGGTTTTCGTCATAGATGCACAGGATGATTATATGGAGGCATTAGGAAAACTTCACATGACAGTCACAAGGGCG…	Contig1395	GGGGACATGATCACCAGTGTGTACGATTTTACGTTGGTCTTGCAGAACAGTCTTCAGGAAATCTACGAAAATGACGTTATGGACCAGAAGATCAAGATGAGCTTGCAAGCAGTGACAACAAACCTAGAATTCTATTACTGGGTCTTCGAAGGAGTGGCAAATCCTCAATTCAGAAAGTGGTTTTCCACAAGATGTCCCCTAATGAAACTCTTTTCTTAGAAAGCACAAATAAAATAGTAAAAGATGATATTTCAAATAGCTCATTTGTGCAGTTTCAGATATGGGATTTTCCAGGTCAGATTGATTTCTTTGATCCAGCTTTTGATTCTGAAGTGCTATTTGGACACTGCGGAGCGCTGGTTTTCGTCATAGATGCACAGGATGATTATATGGAGGCCT…	Ras-related GTP-binding protein C OS=Mus musculus GN=Rragc PE=2 SV=1; Accession=RRAGC_MOUSE; E-value=1.0e-141	A7SI02_NEMVE	A7SI02_NEMVE	NA	0.06
SEQINDEX14869_C_c	CGATACACAAAGCATGCTCATACACAACGTATTTTCCTCATTAATCCACACGACACAGTGGAGAACACGAGCGACACTTAGAAGAAACGATGACTGTGNGAGACGTCGAGAGTGAGACACAAATGGGCAAAGTTTTGTCTGATTCTGCCAGTGTTTTGACAGTGATTCACTTCCATGCTCCATGGTCTCCACAATGTACACAGATGAATGATGTTATGAGTGAATTAGCAAAAGATAATTCACATGTTAAATTTTACAAGCTTGAAGCAGAAAATTTACCTGAAGTATCACACAAATATGAAATAAGTGCAGTCCCCACATTCCTTCTTTTCAAGAACCAGAAAGTTGTGGATCGGTTAGATGGTGCAAATGCACCAAGTCTGACCAAGAAAGTTCAAC…	Contig2179	GGGGACAGTGGAGAACACGAGCGACACTTAGAAGAAACGATGACTGTGCAAGACGTCGAGAGTGAGACACAAATGGGCAAAGTTTTGTCTGATTCTGCCAGTGTTTTGACAGTTATTCACTTCCATGCTCCGTGGTCTCCACAATGTACACAGATGAATGATGTTATGAGTGAATTAGCAAAAGATAATTCACATGTTAAATTTTACAAGCTTGAAGCAGAAAATTTACCTGAAGTATCACACAAATATGAAATAAGTGCAGTCCCCACATTCCTTCTTTTCAAGAACCAGAAAGTTGTGGATCGGTTAGATGGTGCAAATGCACCAAGTCTGACCAAGAAAGTTCAACATCATGCTAATGTGGTTACACCAGCAGTGACTCTGGAACAAGAAATAAAA…	Glutaredoxin-3 OS=Rattus norvegicus GN=Glrx3 PE=1 SV=2; Accession=GLRX3_RAT; E-value=1.0e-110	A7RQK5_NEMVE	A7RQK5_NEMVE	A7RQK4_NEMVE	0.0412
SEQINDEX9959_C_c	GAGATCAGGTGTGCATCGTGGCACGGGCGGCTGTAAACTTTCTTGTAGTATAGCAGCTCTCTTTGGCTTGCGTAGGTTCCCTTCATTATGAGTACAGAGAAAGAACCATTAAGAGTTTGTATCACTGGAGCTGCTGGCCAGATTGCTTACTCCCTTTTTACTTCGATTTGTAAAGGAGATGTGTTTGGGCCTGATCAGCCTCTTATCCTAAATCTGTTGGACATTCAGCCAATGATGACTGCACTGAATGGTGTTGTCATGGAGTTGCAAGACAGTGCCTTCCCACTGTTAACAAAGGTGGTTGCCACAGCTGATGCAACGCTTGCTTTCACCGACATTGATGCTGCCATTTTGGTCGGAGCTATGCCACGGAAGGAAGGAATGGAAAGGAAAGATCTG…	Contig914	GGGGACACCCAGTCCCGATTAACTGATCAGGTGTGCATCGTGGCACGGGCGGCTGTAAACTTTCTTGTAGTATAGCAGCTCTCTTCGGCTTGCGTACGTTCCCTTCATTATGAGCACAGAGAAAGAACCATTAAGAGTTTGTATCACTGGAGCTGCTGGTCAGATTGCGTACTCCCTTTTTACTTCGATTTGTAAAGGAGATGTGTTTGGGCCTGATCAGCCTCTTATCCTAAATCTGTTGGACATTCAGCCAATGATGACTGCTCTGAATGGTGTCGTCATGGAGTTGCAAGACAGTGCCTTCCCGCTGTTAACAAAGGTGGTTGCCACAGCTGATGCAACGCTTGCTTTCACCGACATTGATGCTGTCATTTTGGTCGGAGCTATGCCACGAAAGGA…	Malate dehydrogenase, cytoplasmic OS=Xenopus laevis GN=mdh1 PE=2 SV=1; Accession=MDHC_XENLA; E-value=1.0e-117	A7S4V3_NEMVE	A7S4V3_NEMVE	NA	0.0318
SEQINDEX6129_C_c	CTCGTCGGCGTGAGGAACAACATGGTTGTGGGAAAATGGCGATGGCAATTTTTACTTCGCGACCGAATTCTCACCCTTTTGAAGAAAGGACAGTGACACTAAGAGAAGCAGTAAAGATTGGAAGATCAGTAGCCAAAAGCAGGCCTGCTACAAACAACTGTATCTTTGACTGCAAAGTTTTGTCCCGAAACCATGCAATCTTGTGGTACGAGGATGGGAAGTTCTTTTTGCAAGATACCAAAAGTAGCAATGGTACATTTGTGAACAATGTCCGCCTCAGCAAAGGTTCTGAAGAAAGTGAACCAAAGCAAATTAAATCAGGAGACATTGTACAGTTTGGAGTAGATGTTGTGGAAAACTCGAAAAAAGTCACCCACGGTTGCATTGTGGCTACAGTCA…	Contig5786	GGGGACGTACACTCGTCGGCGTGAGGAACAACATGGTTGTGGGAAAATGGCGATGGCAATTTTTACTTCGCGACCGAATTCTCACCCTTTTGAAGAAAGGACAGTGACGCTAAGAGAAGCAGTAAAGATTGGAAGATCAGTAGCCAAAAGCAGGCCTGCTACAAACAACTGTATCTTTGACTGCAAAGTTTTGTCCCGAAACCATGCAATCTTGTGGTACGAGGATGGGAAGTTCTTTTTGCAAGATACCAAAAGTAGCAATGGTACATTTGTGAACAGTGTCCGCCTCAGCAAAGGTTCTGAAGAAAGTGAACCAAAGCAAATTAAATCAGGAGACATTGTACAGTTTGGAGTAGATGTTGTGGAAAACTCTAAAAAAGTCACCCACGGTTGCATTGT…	Sarcolemmal membrane-associated protein OS=Oryctolagus cuniculus GN=SLMAP PE=1 SV=2; Accession=SLMAP_RABIT; E-value=1.0e-100	A7RNL7_NEMVE	A7RNL7_NEMVE	NA	0.0232
SEQINDEX13967_C_c	ATCGCTTTTATATTTGCGGACACATTTTTACTATGGCAATGCAGGATGTTATCAATAAAATGAAAGGTACTGCCCTCGGTGTAGCAGAGTACCTAACACCAGTTCTGAAGGAATCAAAATTTCAAGATACAGGGGTTATTACACCAGAGGAATTTGTTGCTGCGGGGGACCATTTAGTTCATCACTGTCCCACATGGAAATGGGACTCTGGACCAGATGAAACAAGAGTTAAAGCTTATCTACCCAAAGAAAAGCAGTTCTTGTATACAAAGAATGTTCCTTGTTACAAGCGATGCAAAGAGATGGAACATCAAGAGGAGAATGAGGCTATTGTTGAACCAGATGAGGATGGAGGCTGGGTAGACACACACCATCATGTTGATGTCAGTGGGGTACAAG…	Contig2664	GGGGTTTCCGTAAACTTACAGATCTATTGCCACAGGTAGTGTTATTTTCTGTAGATCGCTTTTATATTTGCGGACACATTTTTACTATGGCAATGCAGGATGTTATCAATAAAATGAAAGGTACTGCCCTAGGTGTAGCAGAGTACCTTACACCAGTTCTGAAGGAATCAAAATTTCAAGATACTGGGGTTATTACACCAGAGGAGTTTGTTGCTGCGGGAGACCATTTAGTTCATCACTGTCCCACATGGAAATGGGACTCGGGACCAGATGAAACAAGAGTTAAAGCTTATCTACCCAAAGAAAAGCAGTTCTTGTATACAAAGAATGTTCCTTGTTACAAGCGATGCAAAGAGATGGAACATCAAGAGGAGAACGAGGCTATTGTTGAACCAGATG…	Autophagy-related protein 3 OS=Mus musculus GN=Atg3 PE=2 SV=1; Accession=ATG3_MOUSE; E-value=1.0e-114	A7RTE4_NEMVE	A7RTE4_NEMVE	NA	0.0184
SEQINDEX4491_C_c	CACTGTGGATAGACACGTTCGTTCGCAGTCGGATTCACTTCACGTGGTTACTGACTTTGAATTCGGTAATACTGTGAAGAAAACGATTGCTTCAGTGAAATCAGATTTCGAAAATGTCTTCCTTGGAGAGTTGTTACCGTGGGGCTTTAGCAGCAACACCTGATTCCACGACGTTCTATCGAAGGAAATTTTTTTGCGCTAGTCCTGGGGGTGGAAGGAAAGGAAAGCGACATCCAGGGAAAGCGATCTTGGCTGGTGGTATCGCTGGTGGGCTGGAAATCTGCTGTACATTTCCCACAGAGTATGTTAAGACACAGGTGCAACTTGATGAACGAGCTTCAAGACCAGTTTACAAGGGTCCTATTGATTGCACCATTAAAACTGTGAAGAATCATGGCT…	Contig351	GGGGACAGCACTGTGGATAGACACGTTCGTTCGCAGTCGGATTCACTTCACGTGGTTACTGACTTTGAATTCGGTAATACTGTAAAGAAAACGATTGCTTCAGTGAAATCAGATTTCGAAAATGTCTTCCTTGGAGAGTTGTTACCGTGGGGCTTTAGCAGCAACACCTGATTCCACGACGTTCTATCGAAGGAAATTTTTTTGCGCTAGTCCTGGGGGTGGAAGGAAAGGAAAGCGACATCCAGGGAAAGCGATCTTGGCTGGTGGTATTGCTGGTGGGCTGGAAATCTGCTGTACATTTCCCACAGAGTATGTTAAGACACAGGTACAACTTGATGAACGGGCTTCAAGACCAGTTTACAAGGGTCCTATTGATTGCACCATTAAAACTGTGAAGAA…	Tricarboxylate transport protein, mitochondrial OS=Rattus norvegicus GN=Slc25a1 PE=1 SV=1; Accession=TXTP_RAT; E-value=2.0e-94	A7SSE4_NEMVE	A7SSE4_NEMVE	NA	0.0459
SEQINDEX7291_C_c	CGAAACAATATGGCGGAAGGTAGGGTTGGTACTGCAAGCGAAGTTCGCGAGACAGATTTAAACGACGACATTATTACTGGGGCAATTGGAGCAAATGCCACAACTGAGGTTGAGCTTGAAGAAGAATATCCACGACCATTCCCTGGTATGGACGAAATGCTGAAAGTAGCTACGGATCTACAAAGGAGTGGTGGAGACTCGATTGAACTAAACGATTCACGACCGGGCGAGTTACCCCAACTAGAAGTGGGAAATACTGAAACATCATCAAGTTCATGGGAGCCACCTGAAACTTTTCAAAATGGCCACTCAGCCATGCCATCTGTAGCACGACCGGGCACAGCTCAGAAGATAGATCACTTTAAGAAATGGAGTATTTCAACATACAAGTATACTAGG…	Contig2895	GGGGAAGTGTTGAAACAATATGGCGGAAGGTAGGGTTGGTACTGCAAGCGAAGTTCGCGAGACAGATTTAAACGACGACATTATTACTGGGGCAATTGGAGCAAATGCCACAACTGAAGTTGAGCTTGAAGAAGAATATCCACGACCATTCCCTGGTATGGACGAAATGCTGAAAGTAGCCACGGATCTACAAAGGAGTGGTGGAGACTCGATTGAACTAAACGATTCACGACCGGGCGAGTTACCGCAACTAGAAGTGGGAAATACTGAAACATCATCAAGTTCATGGGAGCCACCTGAAACTTTTCAAAATGGCCACTCATCCATGCCATCTGTCGCACGACCAGGCACGGCTCAGAAGATAGATCACTTTAAGAAATGGAGTATTTCAACATACAA…	Arfaptin-2 OS=Bos taurus GN=ARFIP2 PE=2 SV=1; Accession=ARFP2_BOVIN; E-value=3.0e-80	A7RFY9_NEMVE	A7RFY9_NEMVE	NA	0.0335
SEQINDEX14845_C_c	CAACACAAGTCAACGGTTTAGAACAGGAAGATGGGCGCTGGAATGAGTCTTCGGGCGCTTACTTGGGCGAAGATGCGTGTCCTGAGAGAGCATCAGGCTCTGAAATGGACGAACAACGTAAACAACAGATGGCGTATCAGTACTTGTGCCACTTGGAAGAGGCCAAAGTCTGGATGGAAGCGTGCTTGAAGGAGGAATTACCAGAGACCACGGAAATTGAAGAGGCTCTTCGAAATGGTGTACTCCTTGCTAAACTGGGGAACTTCTTCTCCCCAGAAACGGTTCCATGGCGCAAAATATTTGACAAAGATTTAAAAGTTGCAAATACTCGAGGTCTTCACTTTCGCCACACAGATAATATCAATTTTTTCATGAATGGCTGTAGCAAAGTTGGTCTTC…	Contig6168	GGGGGCTTCAGCGAAGCTGTGTACATTACACGGTGACTCCCCCTTGTTGAGGTCTCTTCATTGCCTTTGAAGTTGGAAGGATTCTTGCTTCATGAGGAATGGCAACACAAGTCAACGGTTTAGAACAGGAAGATGGACGCTGGAATGAGTCTTCGGGCGCTTACTTGGGCGAAGATGCGTGTCCTGAGAGAGCATCAGGCTCTGAAATGGACGAACAACGTAAACAACAGATGGCGTATCAGTACTTGTGCCACTTGGAAGAGGCCAAAGTCTGGATGGAAGCGTGCTTGAAGGAGGAATTACCAGAGACCACGGAAATTGAAGAGGCTCTTCGAAATGGTGTACTCCTTGCTAAACTGGGGAACTTCTTCTCCCCAGAAACGGTTCCATGGCGCAAAA…	Ras GTPase-activating-like protein IQGAP1 OS=Mus musculus GN=Iqgap1 PE=1 SV=1; Accession=IQGA1_MOUSE; E-value=5.0e-86	A7SXE6_NEMVE	A7SXE6_NEMVE	NA	0.0457
SEQINDEX2340_C_c	GACCACTCGGTGGAGGTAGTCAATATGGCGGCGAATGGAGTGTTTCTCCGTTGTGCCGTTTTTCGGCCAACATCTTGCCCGGGAGTGAGAAATATGGCAACGTTGAAAGATATTTCAATGCGTTTGAGGAGTGTAAAGAACATTCAGAAGATTACCAAATCAATGAAGATGGTGTCAGCAGCCAAGTTTGGTAGAGCAGAAAGAGAATTGCGACCTGCAAGAGTTTATGGTGCAGGTGCTTCAGCTTTGTACGATAAAGTAGAGATTCAACCGAGTGAGGCAGAAAAAACCAAGCCAAACAAGCTGATAGTGGTGATGTCTTCAGATCGTGGATTGTGTGGTGGAATCCACTCCAACTTGGTCAAAGCTGTAAAAGCTGCAATGACAGAAAAAGAAGAT…	Contig3533	GGGGACCACTCGGTGGAGGTAGTCAATATGGCGGCGAATGGAGTATTTCTCCGTTGTGCCGTTTTTCGGCCAACATCATGCCCGGGAGTGAGAAATATGGCAACGTTGAAAGATATTTCAATGCGTTTGAGGAGTGTAAAGAACATTCAGAAGATTACCAAATCAATGAAGATGGTGTCAGCAGCCAAGTTTGGTAGAGCAGAAAGAGAATTGCGACCTGCAAGAGTTTATGGTGCAGGTGCCTCAGCTTTGTACGATAAAGTAGAGATTCAACCGAGTGAGGCAGAAAAAACCAAGCCAAACAAGCTGATAGTGGTGATGTCTTCAGATCGTGGATTGTGTGGTGGAATCCACTCCAACTTGGTCAAAGCTGTAAAGGCTGCAATGACAGAAAAAGAA…	ATP synthase subunit gamma, mitochondrial OS=Bos taurus GN=ATP5C1 PE=1 SV=3; Accession=ATPG_BOVIN; E-value=4.0e-81	A7RNI6_NEMVE	A7RNI6_NEMVE	A7RNI6_NEMVE	0.0453
SEQINDEX7061_C_c	TNCATTGTACAATGTCCCAGAGACAAAAGTTACCACCCTCTCAAATGGATTGAGAGTTGCATCTGAAGATTCAGGCCTGTCGACTGCTACCGTTGGTTTGTGGATTGATGCAGGCAGCCGTTTTGAGACTGAAAAGAATAATGGTGTCGCCCATTTTCTTGAGCACATGGCATTCAAGGGAACAAAGAACCGTTCTCAGATGGAGCTTGAGTTGGAGGTTGAGAATATGGGAGCTCATCTGAATGCTTACACATCACGAGAACAGACAGTCTATTATGCAAAGGTGTTCAGCCAGGATATTCCTAAAGCTGTTGACATCCTTGCAGATATCATTCAAAATTCCACTCTTGGTGAGGCTGAAATTGAACGGGAAAGGGGAGTGGTATTGCGTGAAATGCA…	Contig2333	GGGTGCCACAGCCTATCAGGGAACACCTCTTGGGAGAACTATTCCTGGACCTACTGAGAATGTCAAGACCATATCTCGTGATGACCTTGTTGAATACATCAGCAATCACTACAGTGCCCCAAGAATAGTTCTTGCAGCTGCTGGAGGTGTTGATCATGATGCCCTTGTAAAGCTTGCTGAGAATCACTTCAGTGGTCTTAGGTCCACTTATGAAACTCATGATAAATTGACACCTTGCAGATACACAGGCAGTGAGATTCGTGTGCGTGATGATGACATGCCTCTTGCTCATGTTGCCCTTGCAGTGGAAGGCTGCGGCTGGACTCACCCTGATTATTTTGGACTGATGGTTGCCAATATGTTGATTGGAAGTTGGGACAGATCTTTCAGTGCTGGAAG…	Mitochondrial-processing peptidase subunit beta OS=Bos taurus GN=PMPCB PE=2 SV=1; Accession=MPPB_BOVIN; E-value=0.0e+00	A7S9Y6_NEMVE	A7S9Y6_NEMVE	NA	0.0734
SEQINDEX1507_C_c	GGGGGAGATCAGCTAGATGGGGCCCTTACCTGTTGTGTGATATTTGACAGAATTTTGTGCTCAGTATCAATTTACTTTTCCACTGTGTTCAATTTTCAAATAGCCTTAAGAACATTCTGGTTAGCAGGGACTGTTTTTAGCCCGAGATGTCGTTGGAAGACCCATTTTTCGTAGTCAAACAGGAAGTGCAAAAGGCAGTTAATAATGTGGAGTCCTTGTACAGAAGGTGGCAAGATCTGTTAGATAATCCTCGAACTGTTGGAAAAGACGAATATAACTGGACAACAAATGAACTTCGCAACAATCTCAGAAGTATAGAATGGGATTTAGAAGATCTTGATGAAACTATTGGAATAGTGGAAGCAAATCCACGAAAATTCAACATTGATATTACTGAGG…	Contig1051	GGGGACGTGATGATGGCGGAGATCAGCTAGATGGGGCCTTTACCTGTTGTGTGATATTTGACAGAATTTTGTGCTCAGTATCAATTTACTTTTCCACTGTGTTCGATTTTCAAATAGCCTTAAGAACATTCTGGTTAGCAGGGACAGTTTTTAGCCCGAGATGTCGTTGGAAGACCCATTTTTCGTAGTCAAACAGGAAGTGCAAAAGGCAGTTAATAATGTGGAGTCCTTGTACAGAAGGTGGCAAGATCTGTTAGATAATCCTCGAACTGTTGGAAAGGACGAATATAACTGGACAACAAATGAACTTCGCAACAATCTCAGAAGTATAGAATGGGATTTACAAGATCTTGATGAAACTATTGGAATAGTGGAAGCAAATCCACGAAAATTCAACAT…	Syntaxin-6 OS=Pongo abelii GN=STX6 PE=2 SV=1; Accession=STX6_PONAB; E-value=5.0e-61	A7RYT5_NEMVE	A7RYT5_NEMVE	NA	0.0734
SEQINDEX4562_C_c	AGCAAAATATTTTTATGGCCAAACTAGCTGAACAAGCTGAGCGCTATGAAGAAATGGCTGAATACATGAAGAAAGTTGCTAAGGACTCAGAAACTGAGCTTTCTGTTGAAGAACGAAACCTTCTGTCTGTGGCTTACAAGAATGTGATTGGGGCACGGAGAGCTGCGTGGCGCATCCTAAGTTCCTTGGAATCTAGGGCTGATAAAAACAAAGAAACCATTGTGAAGTACAAAGAAAACATCGAGAAGGAGCTGACAAAAATTTGCAATGAAATTCTGGAAGTTTTGAAAGATGTGCTCATTCCAAAGTCAACTACAGAAGAGTCCAAGGTTTTCTTCTATAAAATGACTGGTGATTACCACCGTTATGGAGCTGAGATAACCAAAGATACAGGTAACA…	Contig5884	GGGGGCGTATTTCAAATCTTTGTCTTGAACATTTGAACTGGCTAGTCAAATTTCGCTTCTTTCTTCGAAAATTTTATTATGAATTCATCGAAAGGAAAGCTGACAGATTTCCATGAAACAGTTCGGAAAGAGGCTGAAGACTCTGTGAAAAATTTCTTCCCTGACAGAGTTTTCGAGTTGGACAAGCTTTTGAAGTCTGACATGTTCAGTGTTGATGCAGTGGAGATGGTACAGAAAGCAGTTACTGTGCCTATTAATAAGAATGATGGGCACATAGATGTGGAGCCAAGTCACAAAAAGAGAAAAATCATTGATGGTCTTGAATCTCTTGCGTCAAATCATTTGCCACCGGCCCTCCAAGCTCATATTCCTTGTAACAAGTACCTGCTGCAAGTTATT…	14-3-3-like protein OS=Dictyostelium discoideum GN=fttB PE=1 SV=2; Accession=1433_DICDI; E-value=5.0e-75	A7RQX5_NEMVE	A7RQX5_NEMVE	A9LYL0_HELTB	0.0444
SEQINDEX4376_C_c	GGGGTCACTCTCATTTACTCAAAGCGAGTGGAAAGAAGAGTGCATTTTAGAGTTTTTTTATTACAACAAGCCATCGATAATCTAATGGAGGTTGAGCTTCAAGTTGCTGTGAATTTTTTAATCGGATACCTGGTGAACAAACTGCCGAGAAGACGCGTACAACTTTTTGGCGAAGAAGTAGTAAAACGATTGACGGAGAAATTCGATGGCCATTGGTATCCCGAAAAGCCTTCAAAAGGAAGCGGATATCGGTGCCTCCTTATCACTGACAGTTTAGATCCTGTTCTCAGCTCTGCCGCAAACGACAGTGGACTTAGTCGTCAAGATGTAAAAGCTAATTTACCAGAAAAACTGTGTTTGTGGATCGATCCAGGAGAAGTTTCTTTCAGAATCGGCGAA…	Contig762	GGGGACTCTCATTAACTCAAAGCAAGTGGAAAGAAGAGTACATTTTAGAGTTTTTTTTATTATAACAAGGCATCGATAACCTAATGGAGGTTGAGCTTCAAGTTGCTGTGAATTTCTTAATCGGATACCTGGTGAACAAACTGCCGAGAAGACGCGTACAACTTTTTGGCGAAGAAGTAGTCAAACGATTGACGGAGAAATTCGATGGCCATTGGTATCCCGAAAAGCCTTCAAAAGGAAGCGGATATCGGTGCCTCCTTATCACTGACAGTTTAGATCCTGTTCTCAGCTCTGCCGCAAACGACAGTGGACTTAGTCGTCAAGATGTAAAAGCTAATTTACCAGAAAAACTGTGTTTGTGGATCGATCCAGGAGAAGTTTCTTTCAGAATCGGCGAAC…	Protein Tob1 OS=Rattus norvegicus GN=Tob1 PE=2 SV=1; Accession=TOB1_RAT; E-value=1.0e-36	A7SCK5_NEMVE	A7SCK5_NEMVE	NA	0.0445
SEQINDEX12640_C_c	GGGCGTCATTCTAGCCTTCTTTGCCTTCTTTCGTTGGTAAGAGGAGAGCATTCGATTTGTTTTACGTTGGTTTTGGTCGAGTAAGTTTAACCCAACAACATGGAGGCGATCAAGAAGAAGATGGCCCTACTTCGTGATCAACTTGCCTCAGCAGAGGAAAGAGCAGAAAAGGCAGAACAAGAATTGAAAGAGGCTAACGAACGAGCACAAGCCGCAGAAGGAGAAGTTTCTTCATTGACAAAAGACCTGCAGTGTTTAGAAGATAATCTTGATGCTGCAGAATCTAAATTTGGAGTCATAACAGAGAAACTCAAGGAGGCTGAATGCAATGCTGATGAAAGTGAGCGTGTTCGTAAAGTGTTGGAAAACAGAGGCCAAGCAGATGAGGAGCGATCAAGC…	Contig2538	GGGGATTCTAGCCTTCTTTGCCTTCTTTCGTTGGTAAGAGGAGAGCATTCGATTTGTTTTACGTTGGTTTTGGTCGAGTAAGTTTAACCCAACAACATGGAGGCGATCAAGAAGAAGATGGCCCTACTTCGTGATCAACTTGCCTCAGCAGAGGAAAGAGCAGAAAAGGCAGAACAAGAATTGAAAGAAGCTAACGAACGAGCACAAGCCGCAGAAGGAGAAGTTTCTTCATTGACAAAAGACCTGCAGTGTTTAGAAGATAATCTTGATGCGGCAGAATCTAAATTTGGAGTCATAACAGAGAAACTCAAGGAGGCTGAATGCAATGCTGATGAAAGTGAGCGTGTTCGTAAAGTGTTGGAAAACAGAGGCCAAGCAGATGAGGAGCGATCAAGCCAG…	Tropomyosin OS=Homarus americanus GN=TM1 PE=1 SV=1; Accession=TPM_HOMAM; E-value=7.0e-34	Q6S5G5_NEMVE	Q6S5G5_NEMVE	Q6S5G5_NEMVE	0.0254
SEQINDEX14882_C_c	ATGTTCACTCAGGCGGAGAGACAATGCTGTTGCCATGCACTAACCAATAGGGAACTCTAATAGAACAGTAAATTGTTTTTTCCGCCAATGGAAGAATCGCATTCTTTAATGTTCAAAGTCCAATTTTCATCATTCATCATAAAAGCCTTTACCCTTCCATTTTTCAGTACTTTCCCTTGAAAACTTCGTAGAACTACGATTGAATCCAGCAGAAGACACAGAGTCTTAGTTTCTCGATCTTTTTCATAACCTTAATACAGCGATGTACTCCAAACAACAGCGATTTTTGGGCATCAAAAGAAACTACAGCCCAGAAGATGTAGAAAGACTCCGTGGCTCACTTAAAATCGAGTACACACTTGCGAAGCGAGGCTCCAAAAAACTCTGGGATTACTTGAC…	Contig4061	TTGAATCCAACAGAAGACACAGAGTCTTAGTTTCTCGATCTTTTTCATAACCTTAATACAGCGATGTACTCCAAACACCAGCGATTTTTGGGCATCAAAAGAAATTACAGCCCAGAAGATGTAGAAAGACTCCGTGGCTCACTTAAAATCGAGTACACACTTGCGAAGCGAGGCTCCAAAAAACTCTGGGATTACTTGACTCATGGAGGAGCATCATACATCAACGCTCTCGGGGCACTCACTGGTGGTCAGGCAGTACAAATGGCAAAAGCAGGGCTGAAGGCTATTTATCTTAGTGGATGGCAAGTTGCTGGGGATGGCAATCTTGCAGCACAGACCTATCCTGATCAGAGTCTGTACCCTTCAAATTCAGCCCCCAAACTTGTGGAACGCATTAAC…	Isocitrate lyase OS=Escherichia coli (strain K12) GN=aceA PE=1 SV=1; Accession=ACEA_ECOLI; E-value=1.0e-145	A7RM89_NEMVE	A7RM89_NEMVE	A7RM89_NEMVE	0.0814
SEQINDEX12794_C_c	CCAAATGGCGGATTCGGAACCAGCCGGTGGTGGACGTGGAGGTTTTCGAGGTGGATTTGGCGGCCGAGGCCGTGGAAGGGGTCGCGGTAGGGGCCGTGGACGTGGCCGTGGAAGGGGAAAAGCTGATGATAAAGAGTGGGTGCCAGTAACAAAACTTGGTCGCTTGGTGAAAGATATGAAGATCAAGACCTTGGAACAAATCTATCTTTTTTCTCTTCCTATAAAGGAACATGAGATAATTGATTTCTTCCTTGGATCTGCTCTGAAAGATGAAGTACTTAAAATCATGCCTGTGCAGAAGCAGACCAGGGCTGGACAGCGGACTCGTTTCAAAGCCTTTGTTGCTATAGGCGATAGCAATGGTCATGTTGGCCTTGGAGTGAAATGCTCTAAAGAAGT…	Contig992	GGGGCTTCTCAGTCGCGCAAAGACATCACCAAATGGCGGATTCGGAACCAGCCGGTGGTGGACGTGGAGGTTTTCGAGGTGGATTTGGCGGCCGAGGCCGTGGAAGGGGTCGCGGTAGGGGCCGAGGACGTGGCCGTGGAAGGGGAAAAGCCGATGATAAAGAGTGGGTGCCAGTAACAAAACTTGGTCGCTTGGTGAAAGATATGAAGATCAAGACCTTGGAACAAATCTATCTTTTTTCTCTTCCTATAAAGGAACATGAGATAATTGATTTCTTCCTTGGATCTGCTCTGAAAGATGAAGTACTTAAAATCATGCCTGTGCAGAAGCAGACCAGGGCTGGACAGCGGACTCGTTTCAAAGCCTTTGTTGCTATAGGCGATAGCAATGGTCATGTTG…	40S ribosomal protein S2 OS=Ictalurus punctatus GN=rps2 PE=2 SV=1; Accession=RS2_ICTPU; E-value=1.0e-116	A7RJJ7_NEMVE	A7RJJ7_NEMVE	Q16TN2_AEDAE	0.0535
SEQINDEX9333_C_c	ACACGCGTTTTGTACATCTTGTATTCAAGCTTGGCTAACTCACTATAACAGTTGCCCCGAAGACCGCCTTACCCTCTGGCCGAGCGACCTAAAGCCGATTTTCCGATACATGAAAAATGATTTGGACGCCTTGAAGATACGCTGCGACAATGAAACCCGCGGTTGTAAAGCTCTCGTGCGACTAGACGCACTGAAGACGCATTTAAAGGAGGAATGTGGTTATGTGAAGACTTCGTGCTCCAATGAAGGCTGCCAAGAGGAACTTAATAAACGCGACCTAGAGTCTCACTTAAAAACCTGCAAGTTCCAAACAGCTGAATGTTCAAAGGGCTGTGGATTAAAAGTGAACAAAAACGAAGAGTCGGAGCATAATTGTATAGCCGAGCTGCGAAAAGCACT…	Contig359	GGGGGACCGATCCTAGTTTGACTGCCATAGCGAAAGGCACAATGGGGTTTGACATTGAAAGATTCTCAGGAAAAATCAATGAAGGTCTTCTGTGTTCAATTTGTCGGGATGTTTTGGAAGAACCATTGCAAGCGCCTTGTGAACACGCGTTTTGTACATCTTGTATTCAAGCTTGGCTAACTCACTATAACAGTTGCCCCGAAGACCGCCTTACCCTCTGGCCGAGCGACCTAAAGCCTATTTTCCGATACATGAAAAATGATTTGGACGCCTTGAAGATACGCTGCGACAATGAAACCCGCGGTTGTAAAGCTCTCGTGCGACTAGACGCACTGAAGACGCATTTAAAGGAAGAATGTGGTTATGTGAAGACTTCGTGCTCCAATGAAGGCTGCCAAG…	Protein virilizer homolog OS=Homo sapiens GN=KIAA1429 PE=1 SV=2; Accession=VIR_HUMAN; E-value=9.0e-21	A7S2V9_NEMVE	A7S2V9_NEMVE	A7S2V8_NEMVE	0.0517
SEQINDEX10494_C_c	CGAGCGGTGTTTGAGCTTCAAAATTTGATAGACTGTGAGAGAAAGAGGCTATTCTGTGGTGATTTTTGCGGTCTAAGAACAGCTTGTGAAGGTGACAAGTAGTAGAGAACGCAAGGTGATCTTAAGGCAATACAAAGAGTCGCTATTAGACATGGAATGAGAGACATGGTTTGCGTACACAGATCGCTTATGGAGGAATGTTTTCAGTGGAACCCAAGATCGTAGACGCTCGTTACAGGAACAAACGTTGATTAAAGATTCTACGGAAATCGTGAGACATGGTTCTTACTCCCAGACAAAAAGAGGAGCTGCACAAAGCCATAGCAGATTATCTTTTCCAATGTGGGTTTGAAGATGCTCTAAATGCCTTCAAAAAGGATGCTAACATGCCTGGGGAGC…	Contig4379	GGGGGAAATCGAGCGGTGTTTGAGCTTCAAAAATTGATAGACTGTGAGAGAAAGAGGCTATTCTGTGGTGATTTTTGCGGTCTAAGAACCGCTTGTGAAGGTGACAAGTAGTAGAGAACGCAAGGTGATCTTAAGGCAATACAAAGAGTCGCTATTAGACATGGAATGAGAGACATGGTTTGCGTACTCAGATCGCTTATGGAGGAATGTTTTCAGTGGAACCCAAGATCGTAGACGCTTGTTACAGGAACAAACGTTGATTAAAGATTCTACGGAAATCGTGAGACATGGTTCTTACTCCCAGACAAAAAGAGGAGCTGCACAAAGCCATAGCAGATTATCTTTTCCAATGTGGGTTTGAAGATGCTCTAAATGCCTTCAAAAAGGATGCTAACATGC…	Lissencephaly-1 homolog A OS=Danio rerio GN=pafah1b1a PE=2 SV=3; Accession=LIS1A_DANRE; E-value=0.0e+00	A7S338_NEMVE	A7S338_NEMVE	A7S338_NEMVE	0.0338
SEQINDEX9674_C_c	ACGCAGTCCTCAGCCTTGTCAGAAATGGATAGAGAGAAGATTTACATGTGGGTTCTGGAACTGTCCAGCCCAGACACAAGAGAACATGCTCTCTTGGAGCTCAGCAAAAAGCGAGAAGTTGTTCCTGACTTGGCTCCCATGCTATGGCATTCGTTTGGAACCATTGCTGCTCTGCTACAGGAAATTGTGAATATTTATCCTGTTATCAACCCTCCGAATCTGACAGCACATCAATCAAATCGTGTCTGTAATGCATTGGCATTGCTGCAGTGTGTGGCATCACACCCGGAAACAAGATCAGCATTTTTACAAGCACACATCCCTCTTTTTCTCTATCCTTTTCTTCACACAACAAGCAAAACAAGACCATTTGAGTATTTAAGGCTAACAAGTCTGGGA…	Contig1482	GGGGGGAACAGGCATACATGATTTCCTTTGTAAAGAAACTGTTGTGCATATAGAGTGTGAACTACTACAGAAGTTATTAATCATGATGCATCAGCTTGGACAACAGAGGGGCTTTCCTCACACCCATCCCACGCAGTCTTCAGCCTTGTCAGAAATGGATAGAGAGAAGATTTACACATGGGTGCTCGAACTGTCCAGCCCAGACACAAGAGAACATGCTCTCTTGGAGCTCAGCAAAAAGCGAGAAGTTGTTCCTGACTTGGCTCCCATGCTATGGCATTCTTTTGGAACCATTGCTGCTCTGCTACAGGAAATTGTGAATATTTATCCTGTTATCAACCCTCCGAATCTAACAGCACATCAATCAAACCGTGTCTGTAATGCGTTGGCATTGCTGCA…	Cell differentiation protein RCD1 homolog OS=Xenopus tropicalis GN=rqcd1 PE=2 SV=1; Accession=RCD1_XENTR; E-value=1.0e-140	A7SRS9_NEMVE	A7SRS9_NEMVE	NA	0.0246
SEQINDEX12488_C_c	TAGTACCAGTACCATGTGTCTTTCAGCCCAGAAATCGACAGTAGAAAGGAACGATGTAGACTACTGAGTGCCCACAGGGATTTATTAGGATCAGCCAGAGCCTTTGATGGAAGTATTCTTTTCCTTCCAAAACAACTAGAAGGACCAGCAACTGTTTTGGAATCAGAAAGGAAGACTGATGGCTCAAAAGTCACAGTAACAGTCACTTTAACACGAATAGTTCCTCCAGACGATTGCTTACAACTTCTCATNNNNNNNNNNNNACCAGCTGCTATTCCACAACATAAGATAGAGCTTTGGCCTGGATATATTACTTCAATTCAGTGCTATGAAGGTGGTATGATGCTTCTGTGTGATGTGTCCCACAGGCTTCTAAGAACAGAAACAGTCTATGATTTT…	Contig470	GGGGGCCGCACCATCAGCAAGAAGCAGATGTTGATGAGTGTTTCTACGAAGATTGCCATTCAGTTGAACTGCAAACTTGGTGGTGAAGCCTGGGCTCTGGAGATTCCACTGAAAAAGACCATGGTGGTTGGGATTGACACCTACCATGATTCATCAGCTAAAGGTCGCTCTGTTGGTGGCTTTGTGGCAAGTGTGAACCAGACTCTAACAAAGTATTACTCCAGAGTTTCATTTCAACACACTGGGATGGAGTTCATTGATGCCTTGAAAACGAACATGACAGCTGCCTTGAGGCGTTACCAAGAGGTCAATAGAGATTTGCCGGAGCGAATCATGATCTATCGTGATGGTGTTGGAGACGGACAGTTGCGAACTGTAGTAGAGCATGAGGTTCCGCAG…	Piwi-like protein 1 OS=Danio rerio GN=piwil1 PE=2 SV=1; Accession=PIWI_DANRE; E-value=2.0e-96	A7RFC2_NEMVE	A7RFC2_NEMVE	NA	0.0188
SEQINDEX16149_C_c	GTAGCGAGTCGTTCAGTAGCAGAGGGAAGCCGTGTTGGAATCCTGTTTCATCGAACAATCCATCATCTGCCCCAAATAACAGACTTTCAGGACACAAACATTTCAAAGATTTCAAGATGATTCCTGCAAAAATTGTTCTGAAAAGTACGACTTCCAAGACGCTGAATGATCGCTTTACCGAAATGGCCAGGAAGCAAGTGCGATCTCCACCACAAGTGACCATCACTGGAGTCAGAAGCAATCAGTTTCAAGTGGCACAAGCCAGCATAAAGAATCGTCGCCTAGCAGCCCAGATGGCTAACAGACCCAACATCCAGGAAGTGCTTGGAGGGGATAATTCATCTAACCTGAAAAGCAGACTTGGCTCACCTGGCAGTGGTAGAGGTGGAGTTAAAAAGG…	Contig4114	GGGGGTAGCGAGTCGTTCAGTAGCAGAGGGAAGCCGTGTTGGAATCCTGTTTCATCGAACAATCCATCATCTGCCCCAAATAACAGACTTTCAGGACACAAACATTTCAAAGATTTCAAGATGATTCCTGCAAAAATTGTTCTGAAAAGTACGACTTCCAAGACGCTGAATGATCGCTTTACCGAAATGGCCAGAAAGCAAGTGCGATCTCCACCACAAGTGACCATCACTGGAGTCAGAAGCAATCAGTTTCAAGTGGCACAAGCCAGCATAAAGAATCGTCGCCTAGCAGCCCAGATGGCTAACAGACCCAACATCCAGGAAGTGCTTGGAGGGGATAATTCATCTAACCTGAAAAGCAGACTTGGCTCACCTGGCAGTGGTAGAGGTGGAGTTAAA…	Uncharacterized protein C1orf77 OS=Homo sapiens GN=C1orf77 PE=1 SV=2; Accession=CA077_HUMAN; E-value=4.0e-07	A7SS97_NEMVE	A7SS97_NEMVE	NA	0.122
SEQINDEX3084_C_c	GCCGAGCCTGTAGCTGTGCAAGCTGTGGCGCTGGAGTTTCCGTGTACTGGAATCGATTTTATAATTCAGTTAGCATTCTCAGGCACTTGCTGGCATTAGATTGTGTTGCTGTAGATTACAAAACAAGTTGAAGCTGCAAATTATGCTCTCAATCGGGGTTCAAGTAACGTGATCAAGCAATTGGAATGGTACAATTGCGAAAAGGGTCCATCCTGAATTAATTCTAGAACCAAGGAGGAGTGACTCTCTGCCTGGAAGCGCTTTTAGTTGGCGTTGTCCTTCTCTAAATTCTCGCTGCCACAGGCTTAAAGGGTTGGAACTTTCGCTTTTTCTGAAGTTATCGACCGTTTTGTCTTCAGATTCCAGAAAGAAGGGCCCTACAAACGTCCTATCTTTAGA…	Contig4585	GGGGGGACTTTCGGATTGTTTCCCTGAGGTACATATGTTTATTCTGTAGTCTGCAGAAGCCACTGGTGATCAGCTCCACTATAACTGCAGAAATCCTTGTCCATTCCGAGCGTCAAACTTGAGAAGGTCGCGCCGAGCCTGTGGCTGTGCAAGCTGTGGCGCTGGAGTTTCCGTGTACTGGAATCGATTTTATAATTCAGTTAGCATTCTCAGGCACTTGCTGGCAATAGATTGTGTTGCTGTAGATTACAAAACAAGTTGAAGCTGCAAATTATGCTCTCAATCGGGGTTCAAGTAACGTGATCAAGCAATTGGAATGGTACAATTGCGAAAAGGGTCCATCCTGAATTAATTCTAGAACCAAGGAGGAGTGACTCTCTGCCTGGAAGCGCGTTTAGT…	Plasma membrane calcium-transporting ATPase 1 OS=Rattus norvegicus GN=Atp2b1 PE=2 SV=2; Accession=AT2B1_RAT; E-value=2.0e-63	Q6UUX1_9CNID	Q6UUX1_9CNID	NA	0.0632
SEQINDEX1703_C_c	GCACGAGTCAGTAACTGTATTGTGGAATAGAAGAAAGGTTCTTGGGGGAATCTGCAGCCATCCTCCTTCGTTATACACACTGTTAGAATGGGGCGAAGACCTGCCCGTTGTTACCGCTATTGCAAAAACAAGCCATNTCCCAAGTCTCGTTTTTGCCGTGGTGTTCCAGATCCCAAAATAAGGATTTATGATTTGGGGCGCAAGAAGGCACGTGTAGATGACCTGCCACTCTGTGTTCACATGGTGTCTGATGAGTATGAACAGCTGTCAAGTGAAGCCCTTGAGGCAGCCCGTATCTGCTGCAACAAGTACATGGTGAAGCACTGTGGGAAAGATTCTTTCCATCTCCGTATGCGACTCCATCCTTTCCATGTTATCAGGATTAACAAAATGTTATCA…	Contig5039	GGGGCTTCTCCGTCGAGTACTAGAGAATTCGGTGAGTCAGTAGGTGTATTGTGGAATAGAAGAAAGGTTCTTGGGGGAATCTGCGGCCATCCTCCTTCGTTATACACACTGTTAGAATGGGGCGAAGACCTGCCCGTTGTTACCGCTATTGCAAAAACAAGCCATACCCCAAGTCTCGTTTTTGCCGTGGTGTTCCAGATCCCAAAATAAGGATTTATGATTTGGGGCGCAAGAAGGCACGTGTAGATGACCTGCCACTCTGTGTTCACATGGTGTCTGATGAGTATGAACAGCTGTCAAGTGAAGCCCTTGAGGCAGCCCGTATCTGCTGCAACAAGTACATGGTGAAGCACTGTGGGAAAGATTCCTTCCATCTCCGTATGCGACTCCATCCTTTCC…	60S ribosomal protein L10 OS=Drosophila melanogaster GN=Qm PE=2 SV=1; Accession=RL10_DROME; E-value=1.0e-101	A7RJH6_NEMVE	A7RJH6_NEMVE	A7RJH6_NEMVE	0.0515
SEQINDEX4809_C_c	AAATATCGACAACCAAGAAGCACGTTATGTCTACATTCTTCAAAGTTCAAGAATAAATTAAGCCGTCCTTTCTTTCGTAAGCAGAGGTTTGTTGGTTTACATGCAACAAGACTGTAATTGTTTTTTCGGCTGGAAAGATCATAGAGTTTACTAAAGAAAGTGCGCCATGGATGAAATCGAAGACAAGGGCGAACTGTTAGTCATAGCCAACCTCGCTGAGCAGGCGGAGCGATATGATGACATGCTAACTGTCATGAAAAAGATCGTCATCATGTCTAAAGAACTGAACACAGAGGAGCGGAACATGCTTTCTGTGGCGTACAAGAACGTCATCGGCGCAAGAAGAGCTGCGTGGAGAATATTTGCTAGTCTGGAGCAGAAACACGAAGACAATCCAAA…	Contig2636	GGGGACAATCCCAAATATCGACAACCAAGAAGCACGTTATGTCTACATTCTTCAAAGTTCAAGAATAAATTAAGCCGTCCTTTCTTTCGTAAGCAGAGGTTTGTTGATTTACATGCAACAAGACTGTAATTGTTTTTTTCGGCTGGAAAGATCATAGAGTTTACTAAAGAAAGTGCGCCATGGATGAAATCGAAGACAAGGGCGAACTGTTAGTCATAGCCAACCTCGCTGAGCAGGCGGAGCGATATGATGACATGCTAACTGTCATGAAAAAGATCGTCATCATGTCTAAAGAACTGAACACAGAGGAGCGGAACATGCTTTCTGTGGCGTACAAGAACGTCATCGGCGCAAGAAGAGCTGCGTGGAGAATATTTGCCAGTCTGGAGCAGAAACACG…	14-3-3 protein epsilon OS=Ovis aries GN=YWHAE PE=1 SV=1; Accession=1433E_SHEEP; E-value=2.0e-74	Q7PX08_ANOGA	Q7PX08_ANOGA	NA	0.0499
SEQINDEX7481_C_c	CACCAAAAACAGTACTGTTCTTGCAATTTCGAAAACTGTGAAGTGAAATAGATGTATAAGTATCAAACTGTCGGATTTTCTTGGGCCTAACTCGACAAGCAACTGCGTATTTCTTGCCAAGACTGTATCTTAAGGTTTCAGCTCTTGAATATCGTTTTCAATTTTGTAAACTCTCGCGATGTCTCTGTCACCTTCTCAGGCATCAAATAAGCAACCACGTTCAGGAAGACAATCGGCAACACGTCAATCAGAAAAAGTGGCTTTTACTTCTGGTAAATCGAGTTTTTCGGGGAACCATTCAGCTGTTTCAGTCATAGAATCTGTGGTGAATCCAAGGAAAAATCCATTTTCTGTTCCTCAAGACAATGATGTATTTATGTTAAGAGACAAAGAACGACA…	CCHX4402.b1_c_s	GGGGAACCAGAATTGTTTTCTTCGGATCCTCAACAACTTCTTGACATCTTTGCCGAACTCGAGGAACAAAATTTGTCGCTCATACAAAACAGCCAGGAAACCGAAGAAGCGCTAGAGGAGTTGCGACAAACGATCAAACAAACACAAGAAAGAATGAACCGTGAAACTGAAATTCTTAAAGGCCAAATTGACTTCTTAAATGATGCAATAAACAGAGAGGAAGAGAGAGCCAAAGAACTAGAGATGAAATCAAAAATGTTTTCATATGGAGAATTCAAAGCAGAAGACCAGGAAAAAATGCTACAAATGCTGAATAAGAAAGTTGAAGACGTTTATCGAAATTGTATCGGAGACAATGAAGCAAACATCAGCACCCTTCAGATGCTAACAAACATTGAA…	Coiled-coil domain-containing protein 38 OS=Mus musculus GN=Ccdc38 PE=2 SV=1; Accession=CCD38_MOUSE; E-value=4.0e-57	A7RX27_NEMVE	A7RX27_NEMVE	NA	0.038
SEQINDEX1055_C_c	ATTTGATCCTTCCTTCCAAAGGGGGTATCAGTAATGAAGCTCAATATTGCCTACCCAGCAACTGGCTGCCAGAAGCTTATCGAAGTTGATGATGACCGAAAACTTCGTCCTTTCTATGACAAACGTATGGCGGCTGAATGTAGTGCTGAAAGCCTCGGTGATGAATGGAAGGGATATTTGGTGAGAATCTCTGGAGGGAATGACAAGCAGGGTTTCCCTATGAAGCAGGGAGTCATGACAAATGGCCGCGTTCGCCTCCTGTTATCAAAGGGTCACTCCTGCTATAGGCCTCGTCGAAGTGGTGAACGCAGGCGCAAGTCTGTACGTGGCTGCATAGTGGATTCCCAGCTCAGTGTTCTGAATCTTGTCATTGTTAAGAAAGGCGAGAATGAGATTCCT…	Contig1576	GGGGGCTCTCTCTGTTGGCTCTTATTTGATCCTACCTTCCAAAGGGGGTATCAGTAATGAAGCTCAATATTGCCTACCCCGCAACTGGCTGCCAGAAGCTTATCGAAGTTGATGATGACCGAAAACTTCGTCCTTTCTATGACAAACGTATGGCGGCTGAATGTAGTGCTGAAAGCCTGGGTGATGAATGGAAGGGATATTTGGTGAGAATCTCTGGAGGGAATGACAAGCAGGGTTTCCCTATGAAGCAGGGAGTCATGACAAATGGTCGTGTTCGTCTCCTGTTGTCAAAAGGTCACTCCTGCTATAGGCCTCGCCGAAGTGGTGAACGCAGGCGCAAGTCTGTACGTGGCTGCATAGTGGATTCCCAGCTCAGTGTTCTGAATCTTGTCATTGTTA…	40S ribosomal protein S6 OS=Branchiostoma floridae GN=RPS6 PE=3 SV=1; Accession=RS6_BRAFL; E-value=3.0e-73	A0MQ84_BRABE	A0MQ84_BRABE	NA	0.0362
SEQINDEX1608_C_c	GAGGAANGATGANGGATATCACCAGAGAAGAGGATGATGAGGATGAAGAAGATGAAGATGAGGAGGATTATGATGAAGATGATGACTATGAAGAGAGAGGCAAAGAAAGAAAAAGCGAAGACACACTGGATTTATCTTAGACGAAGCAGATGTTGATGATGATATAGATGAAGCTGAGGAACTACCTGAGGATGGGTTTCCTGATATTATTGACTCCGGTGAACGAGATGAAGAATCAAATGGGGAGGACTTGTCGGGTGCCAGACGCTTGCAGCAGATGCTTGGAGACAAAAATGCTGAAGAGTTGGAGGCTTACTACAAAAAAAAGTTTGCTGAGACTTCAGACCGATATAAAGATGACTATGAACTGCGTCCTGAGATTCAACAGCAGAGTCTGTT…	Contig6302	GGGGAATACAGTCGCCATCTTGAAAATACAATAGAATGTCGGACAGTGAAGACTCACAATTTTCTGACGAGGAAGGTGAGGATATCACCAGAGAAGAGGATGATGAAGATGAAGAAGACGAAGATGAGGAGGATTATGATGAAGATGATGACTACGAAGATGAGAGGCAAAGGAAGAAAAAGCGACGGCACACTGGATTTATCTTAGACGAAGCAGATGTTGATGATGATATTGATGAAGCTGAGGAACTACCTGAGGATGGGTTTCCTGATATTATTGACTCTGGTGAACGAGATGAAGAATCAAATGGGGAGGACTTGTCGGGTGCCAGACGCTTGCAGCAGATGCTTGGAGACAAAAATGCTGAAGAGTTGGAGGCTTACTACAAAAAGAAGTTTG…	Transcription elongation factor SPT5 OS=Mus musculus GN=Supt5h PE=2 SV=1; Accession=SPT5H_MOUSE; E-value=2.0e-75	A7S1M2_NEMVE	A7S1M2_NEMVE	NA	0.0268
SEQINDEX1681_C_c	GAGAAAACATGTCGCACTGACTCCCGCGACAGNCAAACAGACTTTCTTCATTAATTTAAGCTTTCTGTTATGTTTTACATAGCATTTTGACTTTAACAAGGTAGTTTTCAAACCATTTATCTGCAAAAATGAACAAATTCGAAGCTCTTAAGCTGGATGATTCAAACAATGGAGATAGCACAGACGATAAAGAGGATGATGAATTCGAGTCAAGTACTCCGGAAGGAAATGGTGAAGGAATGAATGGAAGGGAAATGACCGAAGAAGATGAAAGACGAATTAAATTTCAAGCAGAGCTTGAGAAGAAGGTTGTGACGGCAGGGGAAGGAGAGCACCCATTGCAGTGTCCCTATGCATTTTGGTTTTCACGAAGAGCTCCTGGAAAACTTCAGTCATCGT…	Contig5233	GGGGCTACACAACGTAACTTCTGGAGAAAACATGTCGCACTAACTCCCGCGACAGTCAAACAGACTTTCTTCATTAATTTAAGCTTTCTGTTATGTTTTACATAGCATTTTGACTTTAACAAGGTAGTTTTCAAACCATTTATCTGCAGAAATGAACAAATTCGAAGCTCTTAAGCTGGATGATTCAAACAATGGAGATAGCACAGACGACAAAGAGGATGATGAATTCGAGTCAAGTACTCCGGAAGGAAATGGTGAAGGAATGAATGGAAGGGAAATGACCGAAGAAGATGAAAGACGAATTAAATTTCAAGCAGAGCTTGAGAAGAAGGTTGTGACGGCAGGGGAAGGAGAGCACCCATTGCAGTGTCCCTATGCATTTTGGTTTTCACGAAGAGC…	Eukaryotic translation initiation factor 4E type 2 OS=Homo sapiens GN=EIF4E2 PE=1 SV=1; Accession=IF4E2_HUMAN; E-value=9.0e-84	A7RYG8_NEMVE	A7RYG8_NEMVE	NA	0.0874
SEQINDEX2173_C_c	GGCAACTCTAGTTGTTGTTCTGTTGAAGAGGAGAGAGTAACAGTTTTACTTTTGATGAGAGTTTTACTTGTTTTGCGTCAAGAGTAATCAGGATTCAGCATGCCACCCAAAAAGAAGAGTGGGAAAAAGAAAGGAAAGAAGAAGTCTGCAAAGTCAAAGACGCCAACAATAGTGGATGGCATCAGCACTGAGGAAATGAGCAAGGAGCAACTAGAAGAACACATTGTGCGATTAAGAGAAGAGTTAGACAGAGAGCGTGAAGAGCGCAATTATTTTCAACTTGAAAGAGATAAGGTCACTACTTTCTGGGAAATCACAAAGCGGCAGCATGAAGAAAAGAAAGCAGAATTGCGGAACAAGGACCGTGAAATGGAAGAAGCAGAGGAGAGGCACCAGGTT…	Contig4129	GGGAAGCCAATTAAATTTCATTGTACAATGTGGGTCGGACCGCAGCAATTGAAATAAATTATTATTCCTTACTCTTCACAAACAGTGTGAGGTAAAGTGGTTTCTGTACTTACATTTTGTAGGAACAAGTTGAGGAGATGAAGAAGAAGGAAGAGAGAATGGAGAAACAACTGAATGAAATCATGGCAGAGAACAAAAGATTAACAGAGCCATTGCAGAAAGCTAGAGAAGAAGTGGAAGAGCTTAGAAAACAGCTTGCAAACTATGAAAAAGACAAAGCCTCATTGGCTAGTGCAAAAGCAAGACTTAAAGTGCAGGATGAAGAGCTGAGAAGCCTCCACTGGGAACATGAAGTCCTTCAGCAACGCTTCTCACAGACTCAAAGCGAGCGTGACGAAC…	Growth arrest-specific protein 8 OS=Homo sapiens GN=GAS8 PE=1 SV=1; Accession=GAS8_HUMAN; E-value=1.0e-169	A7S3W7_NEMVE	A7S3W7_NEMVE	A7S3W7_NEMVE	0.0877
SEQINDEX10245_C_c	AAAAGTTATTTCAAAATTCGAAGATGAGCAAAGAATACGTGACGCTTGGAGCTCAAAGAGAATCTCTTTTAAACAATCCTCTGCTGCAAAAGTCTGAACTGGGAAGGCCTGTTAGGCGCTGTTTCACTCTGCCATCTGATGGGTTCACGTATGGCAAAGCAAACGAGGGAAAGAACAGTGGAGCTGCTGATGCTCTCATGTGGAGATCTGCGCCTCCAGCACAGCTGTTCCTTAAAGAGAAAAAAGCCCTGAGGGATTTTGTGGGATTGAACAAAGCAGCAGTACAGGCCGGTCTAACGACAGCTCAAGAGCATTTTCAGTACCGTGCAACTCATGACATGACAAGAAAAGAATCGGGAAACGAGAAAATTTTGTTAAAAGTGAAAAGGATTCCTCCAA…	Contig2581	GGGGGTCCATAGCAACGATACAAGAATACATTTCACCGGATTGTAAACGCAAGCCTCATGGGTCGTACAGTACTCCAAAACCTAAAGTAGTTTCTCAAGGCCTGGATGAAAAATAGCGAGTAATCTATACATGTAAGAAAAGTTATTTCAAAATTCGAAGATGAGCAAAGAATACGTGACGCTTGGAGCTCAAAGAGAATCTCTTTTAAACAATCCTCTGCTGCAAAAGTCTGAACTGGGAAGGCCTGTTAGGCGCTGTTTCACTCTGCCATCCAATGGGTTCACGTATGGCAAAGCAAATGAGGGAAAGAACAGTGGAGCTGCTGATGCTCTCATGTGGAGATCTGCTCCTCCAGCACAGCTGTTCCTTAAAGAGAAAAAAGCCCTGAGGGATTTTGT…	Uncharacterized protein FLJ46082 OS=Homo sapiens PE=2 SV=1; Accession=YI011_HUMAN; E-value=1.0e-29	A7RYZ2_NEMVE	A7RYZ2_NEMVE	NA	0.0674
SEQINDEX7099_C_c	GGAGTGGGTCAAAATGGCAGCATCGAGAGTGTTAATCTATGGTGGTAAAGGAGCGCTTGGAATGACTTGTGTCACTTATTTCAAGGCTAGAAATTGGTGGGTCGCATCAGTAGATCTGTTTCCCAATGAAGAGGCGCATGCAAATGTTATTGTTTCCAAGACTGAATCATGGACTGAACAGAATGAGGAGATCCAGCCAAAAGTGGACGCTATTCTTGACGGGATCAAACTTGATGCAATCGTCTGTGTTGCTGGAGGCTGGGCTGGTGGAAGTGCCAAGAGCAAAGCTGTAGTCAAGAATGCAGACTTGATGTTTAAGCAGAGTGTGTGGACATCCCTCATTGCTGCTAACCTTGCATCGAAACACTTGAAAGAGAATGGGCTCCTCACACTGACGGG…	Contig1406	GGGGAGTGCGTTTCACGTGGAGTGGGTCAAGATGGCAGCATCGAGAGTGTTAATCTATGGTGGTAAAGGAGCGCTTGGAATGACTTGTGTCACCTATTTCAAGGCTAGAAATTGGTGGGTTGCATCAGTAGATCTGTTTCCCAATGAAGAGGCTCATGCAAATGTTATTGTTTCCAAGACTGAATCATGGACTGAACAGAATGAGGAGATCCAGCCAAAAGTGGACGCTATTCTTGACGGGATCAAACTTGATGCAATCATCTGTGTTGCTGGAGGCTGGGCTGGTGGAAGTGCCAAGAGCAAAGCTGTAGTCAAGAATGCAGACTTGATGTTTAAGCAGAGTGTGTGGACATCCCTAATTGCTGCTAACCTTGCATCAAAACACTTGAAAGAGAATGG…	Dihydropteridine reductase OS=Bos taurus GN=QDPR PE=2 SV=1; Accession=DHPR_BOVIN; E-value=2.0e-68	A7S0R5_NEMVE	A7S0R5_NEMVE	NA	0.0646
SEQINDEX328_C_c	TCGTCAAACTCTACCGATGAAACGGGCCACACGAAGAAGAAAGGAGGTGGTTTCCTAGCGCGACAAGCCAAAGCCAGAAAGACAATTACAGAGGAGGAATTATTGAAGAAAGACTATGTCGCACCTGAGGATGTCTTAAAATTAACGAAATGCACCGAAAATTACCTCTGTGAACCAGGAGCAAATATATACAACATCGATTTTACGCGCTTTAAGATACGAGATATGGAAACTGGTGCTGTTCTATTCGAGATCGCGAAGCCAGATAATATTGACGACGAAATAATAGACAACGACGAAGATCCCAACGCCGGCCGCTTTGTCAGATATAAATTCTCATCAGAATTTCTGAAGTTGAAAACTGTAGGAGCAACGGTTGAATTTACAGTGGGGGATAAA…	Contig5420	GGGGGAGAACGTTCATTTCGCTTGGTTGTGTGTGGTGCAAAGTTTCTTACACGAGATTTGGTCACGCAGTGCAGAAAAAAATTCGGGAATACAACACATTCTTGGCATCTTCCTTCTTCTAGAAGAATATGAGTGGAAGATCGTCAAACTCTACCGATGAAACGGGCCACACGAAGAAGAAAGGAGGTGGTTTCCTAGCGAGACAAGCCAAAGCCAGAAAGACAATTACAGAGGAGGAATTATTGAAGAAAGACTATGTCGCACCTGAGGATGTCTTAAAATTAACGAAATGCACCGAAAATTACCTCTGTGAACCAGGAGCAAATATATACAACATCGATTTTACGCGCTTTAAGATACGAGATATGGAAACTGGTGCTGTTCTGTTCGAGATCGCGA…	Protein unc-119 homolog B OS=Homo sapiens GN=UNC119B PE=2 SV=1; Accession=U119B_HUMAN; E-value=1.0e-72	A7RLW3_NEMVE	A7RLW3_NEMVE	A7RLW3_NEMVE	0.0633
SEQINDEX5081_C_c	GTGGAAGGGGGACATCGAGTTGTCATATTTGATAGATTTCAAGGTGTGAAACCTGACGTGGTCGGTGAAGGTACACACTTTATCATCCCCTGGGTCCAGAGACCAATCATGTTTGATATCCGCAGCAGACCAAGGAATGTACCTGTTATAACTGGAAGCAAAGATTTACAGAATGTCAACATTACACTGAGGATCTTGTTTAGACCTCAACCTCATGTTTTACCCAAAATGTACATGAATCTCGGTGAGGATTATGATGAGAGAGTTTTGCCATCAATCACTACTGAAGTTCTCAAAGCTGTTGTGGCTCAGTTTGACGCTGGAGAACTTATAACACAGAGAGAAGTGGTTTCTCAGAAAGTTCAGGAGTCCTTGACTGAGAGAGCCGCAAGTTTTGGA…	Contig1266	GGGGATTCACGTGGTTTTAATATACCAAGATGGCAGCTTCTTTCTTCAACAGGCTTGCAGGTATTGGAGTTGGTCTTGCAGCGCTTGGTGGCGTCGTCAATACAGCTCTCTTTAATGTGGAAGGGGGACATCGAGCTGTCATATTTGATAGATTTCAAGGTGTGAAACCTGACGTGGTCGGTGAAGGTACACACTTTATCATCCCCTGGGTACAGAGACCAATCATGTTTGATATCCGCAGCAGACCAAGGAATGTACCTGTTATAACTGGAAGCAAAGATTTACAGAATGTAAACATTACACTGAGGATCTTGTTTAGACCTCAACCTCATGTTTTACCCAAAATGTACATGAATCTTGGTGAGGATTATGATGAGAGAGTTTTGCCATCAATCACTA…	Prohibitin OS=Gallus gallus GN=PHB PE=1 SV=1; Accession=PHB_CHICK; E-value=1.0e-103	A7RG85_NEMVE	A7RG85_NEMVE	A7RG85_NEMVE	0.0487
SEQINDEX5038_C_c	TTCTTGGTTGTAATGGCAACATTTGCTGTCGTGAGAGTGGAAGGAACAGCTAAAGGAGCTGTACCCCTGGATACCTTAACTTTCGATAAGGTCATTAGCAAGCATAAAGCAGTTGTTGTCAAGTTTGACAAGCAGTATGCATACGGAGAGAAAGAAGATGAATTCAAAAAGTTTGCTGAAAAGTCTTCATCACAGCCTGATCTTCTAGTCGCTGAAGTAGGAGTCTCTGAGTACGGTGAGAAAGAAAATGACCAACTTAGAGAAAGGTTTAACATCAATAAGGAGGACTTTCCGGTGTACAAGTTATTTAAACAGAATGAAGCTACTCCAGTTGACTTTAAGGGAGAAATAAAGGCTGATGAGCTCTCTAAATTTGTCAAAACAAATACTCGTCTATGG…	Contig1292	GGGGAATAAGCAATTATTGCTTGGTTCGGTTCGGAAAAGGGTTACCCACTCTTCTTCTGAGAAGGCAAAATGGCCTCATTTCTTCTGATTTTCTTGGTTGTAATGGCAACATTTGCTGTCGTGAGAGTGGAAGGAACAGCTAAAGGAGCTGTACCCCTGGATACCTTAACTTTCGATAAGGTCATTAGCAAGCATAAAGCAGTTGTTGTCAAGTTTGACAAGCAGTATGCATACGGAGAGAAAGAAGATGAATTCAAAAAGTTTGCTGAAAAGTCTTCATCACAGCCTGATCTTCTAGTCGCTGAAGTAGGAGTCTCTGAGTATGGTGAGAAAGAAAATGACCAACTTAGAGAAAGGTTTAACATCAATAAGGAGGACTTTCCAGTGTACAAGTTATTT…	Endoplasmic reticulum protein ERp29 (Fragment) OS=Gallus gallus GN=ERP29 PE=1 SV=2; Accession=ERP29_CHICK; E-value=5.0e-36	B2LYK8_SHEEP	B2LYK8_SHEEP	NA	0.0391
SEQINDEX8144_C_c	ACTGTTAAGTACTTTCTTTAGGACGCAGCGGACAGTGCAGACATGCTCGAAGACGAGAAACTTCGCACCCAGTCAGTGGATTTAAGCACAGACACGTCGTTAATGGTAGATATTTCGGATGCCTTGAGCGAACGAGATCGTGTGAAGTTTACAGTGCACACAAAGACGACACTTCCCACTTTCAAGGAAGGAGAGTTTTCTGTCGTTAGAGAGCACGAGGAGTTTGTATGGCTACATGATCGCTACGTGGAAAACGAGGACTATGCGGGAATTATTATTCCTCCTGCTCCACCAAAACCAGATTTTGATGTCTCTCGTGAGAAGCTACAAAAACTTGGGGAAGGTGAAAATACGATGACAAAAGAAGAGTTTCAGAAGATGAAACAAGAGCTAGAAGCT…	Contig1590	GGGGGGTCTGTTCCGTGCCTCACGGCTTCCTCAAACATGATGGACGCAGCGGACAGTGCAGACATGCTCGAAGACGAGAAACTTCACACCCAGTCAGTGGATTTAAGCACAGACACCTCGTTAATGGTAGATATTTCGGATGCCTTGAGCGAACGAGATCGTGTGAAGTTTACAGTGCACACAAAGACGACACTTCCCACTTTCAAGGAAGGAGAGTTTTCTGTCGTTAGAGAGCACGAGGAGTTTGTATGGCTACATGATCGCTACGTGGAAAACGAGGACTATGCGGGAATTATTATTCCTCCTGCTCCACCAAAACCAGATTTTGATGTGTCTCGTGAGAAGTTACAAAAACTTGGGGAAGGTGAAAATACGATGACAAAAGAAGAGTTTCAGAAG…	Sorting nexin-6 OS=Pongo abelii GN=SNX6 PE=2 SV=1; Accession=SNX6_PONAB; E-value=1.0e-125	A7RP73_NEMVE	A7RP73_NEMVE	A7RP73_NEMVE	0.0373
SEQINDEX5278_C_c	TCTGTATTGAGTGNCTGTGCTGTAAAATGAAGGAAAAGACAGCGAGTTCATCGTTAAGTCAGGTTGAGGTTGCCTATTTGAGGGCTGCAAGAGCCGGGATCCTTGAAAAAGTCCTGAATTTTCTCAATGAAGATGGAGATATTCACACTTGCAACGCAAATGGACTGAATGCATTACACTTGTCATCCAAGGAGGGTCATATCGAAGTTGTGAAAGAGCTCCTAAAGCGTGGAGCAGGAGTCAATTTTACCACCAAGAAAGGAAACACAGCACTGCACATTGCTGCACTTGCTGGACAAAAATTGGCTGTGGAAGTGTTATTAGACTCTGGAGCATCAGTGAACTCCAAAGCTCAGAATGGTTTTACCCCACTGTATATGGCAGCTCAAGAGGGACATG…	Contig6761	GGGGGGTCTTGATTTAGTTTTGGCTCTTATCTGTATTGAGTGCCGTGCTGTAAAATGAAGGAAAAGACAGCGAGTTCATCTTTAAGTCAGGTTGAGGTTGCCTATTTGAGGGCTGCAAGAGCTGGGATCCTTGAAAAAGTCCTGAATTTTCTGAATGAAGATGGAGACATTCACACTTGCAACGCAAATGGACTGAATGCATTACACTTGTCATCCAAGGAGGGTCATATCGAAGTTGTGAAAGAGCTCCTAAAGCGTGGAGCAGGAGTCAATTTTACCACCAAGAAAGGAAACACAGCACTGCACATTGCTGCTCTTGCTGGACAAAAATTGGCTGTGGAAGTGTTATTAGACTCTGGAGCCTCAGTGAACTCCAAAGCTCAGAATGGTTTTACCCCA…	Ankyrin-2 OS=Homo sapiens GN=ANK2 PE=1 SV=2; Accession=ANK2_HUMAN; E-value=1.0e-180	A8JNM5_DROME	A8JNM5_DROME	A8MQV1_HUMAN	0.0235
SEQINDEX13331_C_c	ATGATGAAAAGCATGAACAGATAAAACAACATCAAGATGATGAGTATGCTTGGGCAGGGGTGCAAGATCCAAAGGTTATGATCACAACCTCTCATGATCCAAGCTCACGGCTAAAACAGTTTGCTAAGGAGTTGCGGCTGATCTTTCCCAACAGTCAACGTCTGAACCGTGGAAGCTTTGTCATGGGTCAGCTAGTTCAAGCCTGTCGAGCTAATGAAGTCACTGATTTGATTCTTGTACACGAACACAGAGGAGAACCAGATGGCTTGGTTATATGTCACCTTCCTTTTGGCCCTACGGCGTACTTCACACTCTCCAACACAGTGATGCGACATGACGTCCCTGACATAGGAACAATGTCTGAAGCTTATCCTCATTTAGTGTTTCACAACTTTACTT…	Contig6504	GGGGGATCTTTGCGGCCTGTTCTTATAATATCATTCTATTTTTAACAGTTAAGACGTCAGGCACGGCTTAGAAGAGAGTATCTTTATCGTAAATCGCTTGAGGAAAAGGAAAGAACTATCTATGAGCGCAAGAAGAAGTTGAAGGCTGCTTTGGAAGAGGGAAAATCCATTCCGACGGAGTTAAGGAAAGATGAAGCAGAACTAAGAAAGGCCATAGAATTTGATGATGAAAAGCATGAACAGATAAGACAACATCAAGATGATGAGTATGCTTGGGCAGGTGTGCAGGATCCAAAGGTTATGATCACAACCTCTCATGATCCAAGCTCACGGCTAAAACAGTTTGCTAAGGAGTTGCGGCTGATCTTTCCCAACAGTCAACGTCTGAACCGTGGAAGC…	U3 small nucleolar ribonucleoprotein protein IMP4 OS=Rattus norvegicus GN=Imp4 PE=2 SV=1; Accession=IMP4_RAT; E-value=6.0e-92	A7RT92_NEMVE	A7RT92_NEMVE	NA	0.0231
SEQINDEX4998_C_c	AAGCACTCAACCCGAAGGCAGAAGTAGCGAGATCTGCTGCTGCCTTGCATTTAAATATAACAGCGGCAAGGGGACTTCAAGATGTCCTTAAAACAAATTTAGGACCCAAAGGCACCATGAAAATGTTGGTGTCAGGGGCTGGAGATATTAAATTAACCAAGGATGGAAATGTATTGCTCCATGAAATGCAAATTCAGCATCCAACTGCTTCCTTAATAGCAAGAGTTGCAACAGCTCAGGATGAATCACTGGTGATGGAACAACTTCAAATGTGCTTATAATAGGAGAGTTACTTAAGCAGGCTGACCTGTACATTTCAGAGGGATTGCATCCACGGCTTATCACAGAAGGATTTGAAGTTGCAAAGAAAAAAGCATTAGAGGTTCTTGAGGAAGTAAA…	Contig1233	GGGAACCAAAAGGGGATTGATCCTTTATCTTTGGATATGCTGGCAAAGGAAGGTATCGTAGGGCTTCGACGTGCTAAGAGAAGGAACATGGAGAGACTGTCCCTTGCATGTGGGGGTATTGCCATGAACTCCTTTGACGACTTGACATCAGATTGTCTGGGACATGCTGGACTGGTCTATGAACATGTCTTGGGAGAAAGTAAATTCACTTTTATAGAAGACCTGAAAAATCCTTTGTCTGTGACAATTCTCATTAAAGGTCCCAATAAACACACACTGACGCAGATCAAGGATGCAGTTCATGATGGCTTGAGGGCAGTAAAAAATGCCATTGAAGATGGAAGTGTTGTACCTGGTGCAGGTGCGTTTGAGGTGGCTGTTAATGCAGCCCTCACAGAG…	T-complex protein 1 subunit zeta OS=Mus musculus GN=Cct6a PE=1 SV=3; Accession=TCPZ_MOUSE; E-value=0.0e+00	A7RLY5_NEMVE	A7RLY5_NEMVE	A7RLY5_NEMVE	0.0222
SEQINDEX11064_C_c	ATGATGGCTACACGGCTTTGCACCTGTCAGCACTCAATAATCACGTGGAAGTGGCTGAGCTTCTCGTCAAACAGGCAAAAGCGAATAAAGATATACAGAATACAAACTTACAAACCCCACTCACCTTGCAGTGGAGAGGCAGCACACTCAGATAGTGAGGCTGCTAGTTCGTGAAGGAGTTAAATTGGACCTTACAGACAAGGATGGAGACACGCCTCTACACGAGTCACTCAGACACCATACACTCTCACAGCTGCGACAGCTGCAGGATATNCTAAGATGTCGGCAAGCTTTTGATGGGTTTNGTGGACTCAAGGAGCTGATAAGAAAAGCAGTGCCTCCATCGCGCTGTTCCTCGCCGCAAATGGTGCAGATCTGAATATCAAAAACAAGAAAGGA…	CCHX7649.b1_c_s	GGGGAAAGGACAGACACCGTTGGATCTATGTCCGGACCCGAATCTGTGCAAAGCTTTGGCAAAGTGTCACAAAGAACGAATGAATGGCAATCAGAAAAACAACGCCAACTCCATACAGCTGGCTGATGTGGATGAGAACGAGGGGCTGGAAGAGTGTATGGTGTGCTCGGACATGAAGCGTGACATGCTGTTCGGACCGTGTGGTCACGTGGCCACATGTTCGTTGTGCTCATCACGTGTCAAGAAGTGCCTGATGTGCAAGGAGGCTGTACAGTCCAGAACTAAGATCGAAGAGTGTCTTGTCTGCTCCGAGAGGACAGCAGGAGCTTTGTTCAAACCCTGTGGGCACATGGTTGCTTGTGAAAATTGCGCTTTACTGATGAAGAAATGCGTGCAGTG…	E3 ubiquitin-protein ligase MIB1 OS=Homo sapiens GN=MIB1 PE=2 SV=1; Accession=MIB1_HUMAN; E-value=1.0e-131	B0YJ38_HUMAN	B0YJ38_HUMAN	NA	0.093
SEQINDEX7666_C_c	TTGTACCGAACAACAAAGCAAGATGCAGATTGTGGGCAAACATCAAAGGCTGTTGACCGGCTTATTGAAAAAGAGAAAGAGCTGCAGGTGGCAATCAAACAGGTACAAGAGCAGCAAGCCAGACAGCAAGAGATCCGCATGATGAAGGAGGAAATTTCAAAGAAAGATCAAGAGATCCTTAATCTTGAATCTCAGCTGAAGGAAGCTGAAAAAATTTTATCTTCAGCTTTGTTCCAAGCAAAGAAAAAGTTGTCTGCTGTAAACCAGGCCAACAAAGGAACAGTTTCATCTGAGGAACTTATTAAATATGCTCATCGAATCAGTAGTAGTAATGCTGTGGAAGCTCCTATATCATGGATGCCAGGTGACCCTCGCAGGCCATATCCACAAGACATTGAG…	Contig1278	GGGGTGGGCAAACATCAAAGGCTGTTGACCGGCTTATTGAAAAAGAGAAAGAGCTGCAGGTGGCAATCAAACAGGTTCAAGAGCAACAAGCCAGACAGCAAGAGATCCGCATGATGAAGGAGGAAATTTCAAAGAAAGATCAAGAGATCCTTAATCTTGAATCTCAGCTGAAGGAAGCTGAAAAAATTTTATCTTCAGCTTTGTTCCAAGCAAAGAAAAAGTTGTCTGCTGTAAACCAGGCCAACAAAGGAACAGTTTCATCTGAGGAACTCATTAAATATGCTCATCGAATCAGTAGTAGTAATGCTGTGGAAGCTCCTATATCATGGATGCCAGGTGACCCTCGCAGGCCATATCCACAAGACATTGAGATGCGATCAGGATGGCTTGGGAGACGTA…	Mediator of RNA polymerase II transcription subunit 4 OS=Danio rerio GN=med4 PE=2 SV=1; Accession=MED4_DANRE; E-value=1.0e-32	A7RR67_NEMVE	A7RR67_NEMVE	NA	0.0913
SEQINDEX11136_C_c	GTTCTATGTTAAGATGGCGGATGCTAAAGAGTTACAGAACAACTTGACAGAATATCGCGCCCAGTTGAGGCAGGTCGAAGCGGCTCTGACGACAGACCCAGAAAATGAAGAGTTGAAGAAATTAAAACAGGATTTAGAAGAAGTTATCACTCTAACGTTGGATCTTCTGAATGTCAATGAGAAAGGAGGAAATAGTGCTGCGGCACCATCTGGCACCAAATGGAAAGTAGGGGAGACATGCCAAGCAGTGTGGAGTCAAGATGGGAGCTACTATGATGCTACTGTTGATAGCATATCTGATGATCTGACAACATGTACTGTTTCATTTGACAAGTATGGAAACACAGAAATTGTCAAGCTTTCTTCATTAAGACATAAAAACCAAGCAGGGATGAAAAG…	Contig908	GGGGACCACTCAGCTGTTCTAAGTTAAGATGGCGGATGCTAAAGAGTTACAGAACAACTTGACAGAATATCGCGCTCAGTTGAGGCAGGTCGAAGCGGCTCTGACGACAGACCCAGAAAATGAAGAGTTGAAGAAATTAAAACAGGATTTAGAAGAAGTTATCACTCTAACGTTGGATCTTCTGAATGTCAATGAGAAAGGAGGAAATAGTGCTGCGGCACCATCTGGCACCAAATGGAAAGTAGGGGATACATGCCAAGCAGTGTGGAGTCAAGATGGGAGCTACTATGATGCTACTGTTGATAGCATATCTGATGATCTGACAACGTGTACTGTTTCATTTGACAAGTATGGAAACACAGAAATTGTCAAGCTTTCTTCATTAAGACATAAAAACCA…	Survival of motor neuron-related-splicing factor 30 OS=Mus musculus GN=Smndc1 PE=2 SV=1; Accession=SPF30_MOUSE; E-value=7.0e-15	A7S946_NEMVE	A7S946_NEMVE	NA	0.0878
SEQINDEX9381_C_c	GGATACGTCGTCCATGCAATGGCAGCTGCATCGCGAAAAAATCAATTTAAAGTTGTTCTCTTAGGGGAGGGATGTGTCGGAAAAACTTCCCTTATGCTTCGCTATGTGCAAGACAAGTTTAATGACAAGCATTTAACTACTTTGCAGGCTTCTTTCTTGAATAAGAGGCTCAATATAGACGGTCAACGGGTGAACATAGCTATCTGGGACACAGCAGGACAGGAGAGATTTCATGCGTTAGGACCTATTTATTATAGAGATAGCAATGGTGCAATTCTTGTTTATGATATAACAGATGAAGACTCTTTCTTCAAGGTCAAAAAGTGGATAAAGGAACTGAAGAAAATGTTAGGTGAAGATATTGCACTTTGTATAGCAGGAAATAAAATTGACCTTGAA…	Contig3975	GGGGAAGAACCGAAATGGCGGCTGGACCTTAAGTGAAATTCACCGAAAACAGCGAAAACACTCAGGTTTTGGGCCTTCTGGTGAACGTTTTAGCTCTTAAACGGATACGTCGTCCATGCCATGGCAGCTGCATCGCGAAAAAATCAATTTAAAGTTGTTCTCTTAGGGGAGGGATGTGTCGGAAAAACTTCCCTTATGCTTCGTTATGTGCAAGACAAGTTTAATGACAAGCATTTAACTACTTTACAGGCTTCTTTCTTGAATAAGAGGCTCAATATAGACGGTCAACGGGTGAACATAGCTATCTGGGACACAGCAGGACAGGAGAGATTTCATGCATTAGGACCTATTTATTATAGAGATAGCAATGGTGCAATTCTTGTTTATGATATAACAGAT…	Ras-related protein Rab-21 OS=Rattus norvegicus GN=Rab21 PE=2 SV=1; Accession=RAB21_RAT; E-value=3.0e-77	A7SMT0_NEMVE	A7SMT0_NEMVE	A7SMT0_NEMVE	0.0818
SEQINDEX3695_C_c	TCGAGAAATCTGTGTCGTTNGAAAGAAGTCAAAGTGGACCCTTTTCAGGAAGACACAGTGTTCTGGTCTGAGATGCGACCTGACGAAGGTGGCAGATATGTTGTGTGCTCTTCACCGAGGGACAAGAAGATTTCAAAAGTTTAACTCCTAAGGACTTCAGCTGCCGCACTCTGGTTCATGAATATGGGGGAGGTGCATTCATTGTAAACAAGTACCGCATCTATTTCTCAAATTACAAAGATCAGAGAATGTACTGCCAAAAGGTCAAGAAAGGAGTTACTGCAGAACCAATCCCACTTACACCTGAGGACAAAAATTGGAGGTATGCAGATGCATCAATGTTTAAAAAGCATATCATTGTGTGTGTAAGAGAAGATCATGAAGTGATCAGTCAAGGAG…	CCHX15639.b1_c_s	GGGTGATTCGAGCTTGTCACAGCAGCAATGAAAATTTTGAACCTTATTATAGCGTTCCTAAGGAAGTCACATGGAGCACAACTTACGATGCTAAAGCGCATGGGTATTATTATCCACCCCAGAACAAGATGTATAAAGGTCCCAAGGATCAATACCCTCCTTTACTGGTGAAGGTCCATGGTGGCCCCACTGCGTCATGTTCACCTTCCTTGGATCTCCAAAAGCAATTTTTCACGTCCAGAGGATTTGCAATTCTTGATGTAAACTACCGAGGTAGCACAGGCTTTGGGACAACTTACAGAAATGCACTCAAAAGCAAGTGGGGCATTTTAGACATAGAAGACTGTTGCACCGGGGCACAAGCTATGGCTGACCAAGGTAAAGCAGATCCTGCTAAAC…	Dipeptidyl peptidase family member 6 OS=Caenorhabditis elegans GN=dpf-6 PE=2 SV=2; Accession=DPF6_CAEEL; E-value=3.0e-15	A7RWV1_NEMVE	A7RWV1_NEMVE	NA	0.0736
SEQINDEX2617_C_c	GTGGTTCTGTCAGAAGATAAGCGGAGATTAACGAGCAAAAAATCCGACGACATGGCGAGTTCTAAGGAGAAGCAGTTGAGTTTGCACAAAGTGATAATGGTTGGAAGTGGAGGGGTTGGAAAATCAGCCCTTACTTTACAATTCATGTATGATGAGTTTGTTGAAGACTACGAACCCACCAAAGCGGACAGTTATCGCAAAAAGGTTGTTTTAGACGGTGAAGAATGCCAGATAGACATTTTGGACACAGCTGGTCAAGAAGACTATGCAGCAATTCGTGATAATTATTTTCGTAGTGGCGAAGGTTTTCTTTGCGTATTTTCAATCACCGAATCGGAGTCATTTGAGGCAACGACTGAATTCAGAGAGCAGATCCTTCGAGTAAAGGGGGATGATGAA…	Contig232	GGGGATTGATGCGCATACAAGTTTCAGGGGCGACTGCAAAACACTCGAAAGAAAGGGTGTTGATACTCTTAACGTAGTTTTGTCCAGGTGCTTCTGTCAGAAGATAAGCGGAGATTAACGAGCAAAAAATCCGACGACATGGCGAGTTCTAAGGAGAAGCAGTTGAGTTTGCACAAAGTGATAATGGTTGGAAGTGGAGGGGTTGGAAAATCAGCCCTTACTTTACAATTCATGTATGATGAGTTTGTTGAAGACTACGAACCCACCAAAGCGGACAGCTATCGCAAAAAGGTTGTTTTAGACGGTGAAGAATGCCAGATAGACATTTTGGACACAGCTGGTCAAGAAGACTATGCAGCAATTCGTGATAATTATTTTCGTAGCGGCGAAGGTTTTCTT…	Ras-related protein Ral-A OS=Homo sapiens GN=RALA PE=1 SV=1; Accession=RALA_HUMAN; E-value=4.0e-69	A7RRV2_NEMVE	A7RRV2_NEMVE	NA	0.0601
SEQINDEX14965_C_c	CTTTTTCCTCGGCGACTTTAGAGAAAAAACTAGGCGATCTTTCGAACACCCAGCATAGTGTTCAGACTCTCTCTTTATGGCTCATCCATCACAGAAAACACGCCAAAGCCATTGTCCAAGCGTGGTATAAGGAACTGACTAAAGCCAGACAAAGCAAGAAGCTTACATTCATGTTTCTTGCTAATGATGTTCTGCAGAATGGAAAAAGAAAGGGGGCAGAATTTTTGGGCGAGTTTAAACATATTTTACCATCTGCCTTTCAGCACTGTTCACAAGGTGGATCAGTGGAAGCAATAAAAGGTCTTGAAAGACTTATATCTATTTGGACAGAAAGAAATGTGTATGAAGCCACTTTCCTGATGAAGTTACATAAATGTTTAGGACAAGAATCAGATTCTC…	Contig4642	GGGGGAATTCGTGTAAACGTTTCGGTTTGTAAAGCTGAAATCGATTGAACATGACCTCTTTTTCCTCGGCTACTTTAGAGAAAAAACCAGGCGATCTTTCGAACACCCAGCATAGTGTTCAGACTCTCTCTTTATGGCTCATCCATCACAGAAAACACGCCAAAGCCATTGTCCAAGCGTGGTATAAGGAATTGACTAAAGCCAGACAAAGCAAGAAGCTTACATTCATGTTTCTTGCTAATGATGTTCTGCAGAATGGGAAAAGAAAGGGGGCAGAATTTTTGGGCGAGTTTAAACATATTTTACCATCTGCCTTTCAGCACTGTTCGCAAGGTGGATCAGTGGAAGCAATAAAAGGTCTTGAAAGACTTATATCTATTTGGACAGAAAGAAATGTGT…	UPF0400 protein C20orf77 homolog OS=Mus musculus PE=2 SV=2; Accession=CT077_MOUSE; E-value=6.0e-71	A2ACF4_MOUSE	A2ACF4_MOUSE	NA	0.0521
SEQINDEX5299_C_c	TGGACCCGGAATTAGACGTAAACTTACGCCTTCAATATGATTATCTCTTCAAAGTTCTCCTGATCGGCGATTCAGGTGTCGGAAAATCTTGTCTACTCCTACGTTACGCCGATAGCTCCCACAGAGAAACTTATGTTAACACGATTGGCGTAGACTTCAAAATAAAAACCATCAAACTTGGCAGTAAAAGAATTCGACTACAAGTTTGGGACACTGCGGGTCAAGAGAGATTCAGAACAATAACATCGTCATACTACAGGGGAGCTCATGGAGTCATGATTGTCTATGACATTGCAAAACAGGAAACTTTTAACAATCTTAACAAATGGCTTCATGAGGTGGAGACATATGCTAATGAAGGGGTGTTGATGATACTAGTTGGGAACAAGACAGATCTCA…	Contig3598	GGGGGAACAATGTGTGATTTGACAATACTACCCGGAATCTATGCTATTTAGCCAGTTGCTGTTTCAAAAAGTGTACTCATGGACCCGGAATTAGACGTAAACTTACGCCTTCAATATGATTATCTCTTCAAAGTTCTCCTGATCGGCGATTCAGGTGTCGGAAAATCTTGTCTACTCCTACGGTACGCCGATAGCTCCCACAGAGAAACTTATGTTAACACGATTGGCGTAGATTTCAAAATAAAAACCATCAAACTTGGCAGTAAAAGAATTCGACTACAAGTTTGGGACACTGCGGGTCAAGAGAGATTCAGAACAATAACATCGTCATACTACAGGGGAGCTCATGGAGTCATGATTGTCTATGACATTGCAAAACAGGAAACTTTTAACAATCTT…	Ras-like GTP-binding protein YPT1 OS=Phytophthora infestans GN=YPT1 PE=3 SV=1; Accession=YPT1_PHYIN; E-value=2.0e-58	A7RZN1_NEMVE	A7RZN1_NEMVE	A7RZN1_NEMVE	0.0496
SEQINDEX15634_C_c	CCTGTGGAAATTTTCGCAAGCTGTATTGGTATCGGCGTTGATATTTCAACCATTGGAGTTGGTGATAGATGCCGCTGGATTATATATTAAATATCTTTGGTGATCCTTGCTTTGGAGGTTAAAATGGCGTACGGACTAGATGATATTGACTTAGCTGCTCTCAAGGATCCTGCTGGTATTTTTGATTTGGTGGAAGTGGTCGGAAATGGGACATACGGCCAAGTTCAAAGGGCCGTCACAAAAGGACAGGGCAGCTTGCAGCCATTAAGATAATGGATGTTACGGAAGATGAAGAGGAGGAAATAAAACTAGAAATAAATGTTCTGAGAAAGTTTTCCCATCATCGTAATATTGCCACATATTATGGTGCTTTTGTGAAGAAGGGAATACCAGGACAAG…	Contig1988	GGGGATGCATTTTCACGCAGAGAGAGCGTTAATTTATTTTCAGTTTTCGTCGATGTCGGTCAACGTAACGTTGGAGCCGAAAAAGTTGAAACTGTTTTAAAGCACGTGTTGTTTGTAGTAAGGCGTTTTTTTCGGACGTGACAAGTTTCCTGTGGAAATTTTCGCAAGCTGTATTGGTATCGGCGTTGATATTTCAACCATTGGAGTTGGTGATAGATGCCGCTGGATTATATATTAAATATCTTTGGTGATCCTTGCTTTGGAGGTTAAAATGGCGTACGGACTAGATGATATTGACTTAGCTGCTCTCAAGGATCCTGCTGGTATTTTGATTTGGTGGAAGTGGTCGGAAATGGGACGTACGGCCAAGTTCATAAGGGCCGTCACAAAAGGACAGGG…	TRAF2 and NCK-interacting protein kinase OS=Homo sapiens GN=TNIK PE=1 SV=1; Accession=TNIK_HUMAN; E-value=1.0e-112	A7S5T6_NEMVE	A7S5T6_NEMVE	NA	0.0362
SEQINDEX5508_C_c	ACCATCGCTCTTAAAGCAACAGAAACTACGGCTAATATATCTCGCTCTCCTCACCGAGTTCCTCTAGAAGCCCCACAAATGTTGACCCAGAGTGTTTCGAAATGCAATCAAGATTATATACAGCCACTTCCCTTCAAGGAAGACGAACAGAAAAAATCTCCGTTGGCTCTGCTTGCTGCGACGTGTAGTAGCATCGGTAAAACAGAACCTTCAAAGGAAGCGTTTGGATTCGAAGCAGAGAAATCATCTCAAACTCGCAAGATAAGCGAAGACGAAAGAAGATCTTCGTTTAAACCTTACAAAAGCAGCGCCGGCGAAATGCAGAAAATGGATGACATGGGATCCGAAAAGGCAGGATTTAGGGCCCCAACTAAAGAAAATAGCGCGTCTGTTTCGCCG…	Contig4080	GGGGACAGAAACGTCCAGATATGCCGACGAGAACCATCGCTCTTAAAGCAACAGAAACTACGGCTAATATATCTCGCTCTCCTCACCGAGTTCCTCTAGAAGCCCTACAAATGTTGACCCAGAGTGTTTCGAAATGCAATCAAGATTATATACAGCCACTTCCCTTCAAGGAAGACGAACAGAAAAAATCTCCGTTGGCTCTGCTTGCTGCGACGTGTAGTAGCATCGGTAAAACAGAACCTTCAAAGGAAGCGTTTGGATTCGAAGCAGAGAAATCATCTCAAACTCGCAAGATAAGCGAAGACGAAAGAAGATCCTCATTTAAACCTTACAAAAGCAGCGCCGGCGAAATGCAGAAAATGGATGACATGGGGTCCGAAAAGGCAGGATTTAGGGCCC…	Zinc finger protein 503 OS=Danio rerio GN=znf503 PE=1 SV=1; Accession=ZN503_DANRE; E-value=1.0e-23	A7SXN0_NEMVE	A7SXN0_NEMVE	NA	0.1408
SEQINDEX9295_C_c	CAAAATCTACCAGCAGTTGTGGAGTTAAATGTAGGCGGGCAGTTGTATACAACTTCTCTGCCCACACTTTTAAAAGATCCCGACTCGCTGTTAAGTGCCATGTTCAGCGGAAAACAGAAAATACCGCGCGACTCCCGCGGCAGATTTTTCATCGATCGCGATGGTATTTTATTCCGCTACGTTCTAGACTACCTTCGAAACTCCAAGCTGGCATTGCCGGAAAACTTCAGCGAAAAGGACCGACTTCATGTCGAGGCGGAGTATTTTAGGCTGAAAGGTATCATCAAGGCCTTACATCGAGAGCAAGATCGAACGAAAACAGGCCGCGATGTTAGCAACCGACCATCTGGATATCTATCCATCGGGGTTCGTGGTACATACGCATTCGGCCGGGACGGC…	Contig4418	GGGGATATAATTATTTACTTTTCAGCGAGAGAAACTTAGTGTTGCACGTTGAAGTCTTTATCCCTTTTGGTCGTCTCGTATTTGAAAAAAAAATGCAAGCTCCACTGGAATCACCTCCAGATCAAAATCTCCCAGCAGTTGTGGAGTTAAATGTAGGCGGGCAGTTGTATACAACTTCTCTGCCCACACTTTTAAAAGATCCCGATTCGCTGTTAAGTGCCATGTTCAGCGGAAAACAGAAAATACCGCGCGACTCCCGCGGCAGATTTTTCATCGATCGCGACGGTATTTTATTCCGCTACGTTCTAGACTACCTTCGAAACTCCAAGCTGGCATTGCCGGAAAACTTCAGCGAAAAGGACCGACCTCATGTCGAGGCGGAGTATTTTAGGCTGAAAG…	BTB/POZ domain-containing protein KCTD8 OS=Homo sapiens GN=KCTD8 PE=2 SV=1; Accession=KCTD8_HUMAN; E-value=2.0e-56	A7SNM1_NEMVE	A7SNM1_NEMVE	A7SNM1_NEMVE	0.0863
SEQINDEX6903_C_c	AGCACGTTGATCTCCATCATGGAGGACGGAAGGCTGAAGTTTTTATCCCGTCTCATTTGAAACCTCATCTTGTGTTAAGCCATGAAATTTAACTTATCCTCGAGGTCTTACGCCAAGATTCTCTTACATACTTCGAAGTACCCTCACAAAGCAGTTAATGGAGTTCTTTTGGGAGGCGAAACCGTTGAAGATGGCGAAGTCTATGTGTTGGATGCCGTTCCTTTGTTTCATATTTGCCTTGGTTTAGCGCCGATGTTAGAAGTGGCTCTCGCAAGGGTTGATATTTACTGTAAGCAAAGTGGCCTACAAATAGTAGGTTATTATCAAGCAAATGAACATATTTATGACAATAGTCCAAATGCCATATGCTATAAGATTGGTGAGAAGATATGTGATCAA…	Contig4291	GGGGGAGCACGTTGATCTCAATCATGGAGGACGGAAGCCTGGAGTTTTTATCCCGTCTCATTCGAAACCTCATCTTTTATTAAAGCCATGAAATTTAACTTATCCTCGAGGTCTTACGCCAAGATTCTCTTACATACTTCGAAGTACCCTCACAAAGCAGTTAATGGAGTTCTTTTGGGAGGCGAGACCGTTGAAGATGGCGAAGTCTATGTGTTGGATACCGTTCCTTTGTTTCATATTTGCCTTGGTTTAGCGCCGATGTTAGAAGTGGCTCTCGCAAGGGTTGATATTTACTGTAAGCAAAGTGGCCTACAAATAGTAGGTTATTATCAAGCAAATGAACATATTTATGACAATAGTCCAAATGCCATATGCTATAAGATTGGTGAGAAGATATGT…	Neighbor of COX4 OS=Bos taurus GN=COX4NB PE=2 SV=1; Accession=CX4NB_BOVIN; E-value=7.0e-36	A7RMN9_NEMVE	A7RMN9_NEMVE	NA	0.0765
SEQINDEX3262_C_c	CACGGAATAAGACNAGATGGTATCCTTGAAGACTTTGCTACTGATGGCACTGATAGAAAAGATGTGTTTTTTTATCAGGCTGATGATGAACACTACATTCCAAGAGCTGTTTTACTGGATTTAGAACCAAGGGTTATCGATACAATTACCTCCTCGCCATATGCTAATCTGTACAATCCAGAAAACATGTATACCTCAAAACATGGTGGAGGTGCTGGAAATAACTGGGCCAGTGGGTATTCACAGGCTGAACGCCTTCATGAAGAAATGTTTGATATTATAGACAGAGAAGCTGATGGGAGTGACAGCCTGGAGGGCTTTGTGATGTGTCATTCTATTGCTGGTGGTACAGGATCTGGCATGGGTTCATACCTTTTGGAGAAACTTAATGATAGGTTT…	CCHX16788.b1_c_s	GGGAGGGTTATCGATACAATTACCTCCTCGCCATATGCTAATCTGTACAATCCAGAAAACATGTATACCTCAAAACATGGTGGAGGAGCTGGAAATAACTGGGCCAGTGGGTATTCGCAGGCTGAACGCCTTCATGAAGAAATGTTTGATATTATAGACAGAGAAGCTGATGGGAGTGACAGCCCGGAGGGCTTTGTGATGTGTCATTCTATTGCTGGTGGTACAGGATCTGGCATGGGTTCATACCTTTTGGAGAAACTTAATGATAGGTTTCCGAAGAAGTTGATACAAACATATTCAGTGTTTCCTCAGCAGGAGGACTTCAGTGATGTTGTAGTGCAGCCATACAATTCAATACTAACACTCAAGCGACTGACCCAGAATGCGGATTGTGTGGTT…	Tubulin gamma-1 chain OS=Homo sapiens GN=TUBG1 PE=1 SV=2; Accession=TBG1_HUMAN; E-value=0.0e+00	A7SSE3_NEMVE	A7SSE3_NEMVE	A7SSE3_NEMVE	0.0693
SEQINDEX9301_C_c	GGTGTTTAATTAACTTCCTTTTCCCTGCAGATATTCGCCTTCTGAAGCGTTTGAGAAAAAGATGTCCGAAACATATGATTTCCTTTTCAAGTTTCTTGTGATTGGTAGTGCTGGAACTGGAAAGTCGTGCATCTTGCACCAGTTTATCGAAGGAAAATTTAAGCAAGATTCAAGTCATACCATCGGTGTAGAGTTCGGTTCTAAAGTTGTCAATGTTGGAGGAAAGTCTGTGAAACTGCAAATTTGGGATACTGCAGGGCAGGAGAGATTCAGGTCTGTGACAAGAAGCTATTACAGAGGTGCGGCTGGAGCCTTGCTTGTTTATGACATATCAAGTCGTGAGACATACAACTCTCTGACAAACTGGTTGACAGATGCAAGAACTCTGGCAAGTCCAAA…	Contig3134	GGGGAAAAAAAAGCGGACATTTTCTGATGTGCTAGTGGTGTTTAATTAACTTCCTTTTCCCTGCAGATATTCGCCTTCTGAAGCGTTTGAGAAAAAGATGTCCGAAACATATGATTTCCTTTTCAAGTTTCTTGTGATTGGTAGTGCTGGAACTGGAAAGTCGTGCATCTTGCACCAGTTTATCGAAGGAAAATTTAAGCAAGATTCAAGTCATACCATCGGTGTAGAGTTCGGTTCTAAAGTTGTCAATGTTGGAGGAAAGTCTGTGAAACTGCAAATTTGGGATACTGCAGGGCAAGAGAGATTCAGGTCTGTGACAAGAAGCTATTACAGAGGTGCGGCTGGAGCCTTGCTTGTTTATGACATATCAAGTCGTGAGACATACGACTCTCTGACAAA…	Ras-related protein Rab-4B OS=Danio rerio GN=rab4b PE=2 SV=1; Accession=RAB4B_DANRE; E-value=1.0e-92	A7RZT6_NEMVE	A7RZT6_NEMVE	A7RZT6_NEMVE	0.0669
SEQINDEX8567_C_c	CGGAAGCCTTTACCGGTTTCTAAGCGCAGTACAGGAGGAGATGCCATTTATGTTGACAGGAATGGGAACGCGGACGTTTTGCCACCTTTGAAACCGTCGACGAAAGGCAATGTCAAACAACATGAATCGAGCATTTCTGGTGCTCTTCCTCTCGTAGGAGGTGTTCAAGTGCAGCAGCTGTTTGAAGAAGAAACAAATCAACAGAATAAGAGCAAGATCGTGAATGAAAAACAAGGTTTACCAGCAGTTCATAGACCGATTTCTGTGTCAGGAAACGGGTCTCCAACATCGGGAAGACGGTCTAGCGTGAATGGATCTGGGCATAAAAATCGTGGGCTGCCTATGGCTCCCGAGACGGCTATGAAGCAATTTATGCAAAAATTAACGAGCTTTGAGCAT…	Contig574	GGGGACAAAAGCGAAGGGTAGTTTGTGAGCCTCGAATACTTTGTAACTTTGTTTTACGATAAAGAACACCGCAATACTGGCTACGATTCCAACTAAAGGAAGAGAAGTATGATAACAACGAGTCAACGGAAGCCTTTACCGGTTTCTAAGCGCAGTACAGGAGGAGATGCCATTTATGTTGACAGGAATGGGAACGCGGACGTTTTGCCACCTTTGAAACCGTCGACGAAAGGCAATGTCAAACAACATGAATCGAGCATTTCTGGTGCTCTTCCTCTCGTTGGAGGTGTTCAAGTGCAGCAGCTGTTTGAAGAAGAAACAAATCAACAGAATAAGAGCAAGATCGTGAATGAAAAACAAGGTTTACCAGCAGTTCATAGACCGATTTCTGTGTCAGGA…	Dual specificity tyrosine-phosphorylation-regulated kinase 2 OS=Mus musculus GN=Dyrk2 PE=2 SV=1; Accession=DYRK2_MOUSE; E-value=0.0e+00	A7RQP1_NEMVE	A7RQP1_NEMVE	A7RQP1_NEMVE	0.061
SEQINDEX18702_C_c	TTTTGCTTTGTACTTGAGAGGGCGAGAAGAGCTCATCTGTAGAGTACTGAATGAACCCATGTCTCAAGAAATTTGGTCACATTATGATGCTCCGTCCTCGGAGAAAACCACACTGAAAGGGAAAATCAAGTTTCACATTTGACGGTACAAGTCTGCCAAGGAATGANNNNNNNNNNNNTTTAAGTGGTTACGGTTTCATGGATATTGGCCTTCCTCCAGCAAGTCCAAGTGAAAAAGACATTGATTTGAAGGATGACAGGTCCACACTCTTTCTCATTGCTGCGTATGCAAGGTATAATTGTCCTTATGTTTGGGTGAGATCTAACCATGAGAGACTTGTGGCATTTTGTGGCAATTCCAGTAGCAAAGAGAAACAAAAAGACAGTCCCCTGAAATTGA…	Contig3419	GGGGACATTGAAAATAAACAAAATGGCGTCTCCGAAACTCTCACAAATGGAGAAAAAGAGATTGCAGGCATTTTTGAATGAGATGCTGAGGGGAGGTTGCTTAAAGGGTTTCAAATATTTTGCTTTGTACTTGAGAGGGCGAGAGGAGCTCATCTGTAGAGTACTGAATGAACCCATGTCTCAAGAAATTTGGTCATATTACGATGCTCCGTCCTCGGAGAAAACCAGACTGAAGGGAAAATCAAGTTTCACATTTGACGGTACAAGTCTGCCAAGGAATGAACAATCCTTGATCATGTCATCTAGTTTGCAAAAAAGTTTAAGTGGTTACGGTTTCATGGATATTGGCCTTCCTCCAGCAAGCCCAAGTGAGAAAGACATTGATTTGAAGGATGACAG…	NA	A7SM38_NEMVE	A7SM38_NEMVE	NA	0.0575
SEQINDEX4824_C_c	GCAGTACGCTAAGGTGTGTTTCAATTTGTAAAAATGGCGGAGCATTTTATACTTCAGTAACCAGATTTCCAAAGTCGTAAAGCCACCATTTCTTCAAATACTGACCCTAATTCGCGGACTAAGCGCCCAGGCTTAATACGTTACAATATGGGGAAGTTATTGTCCAAGATCTTTGGTAACAAAGAAATGAGAATTCTGATGTTAGGCCTAGATGCTGCTGGAAAAACAACTATTTTATACAAACTGAAACTTGGCCAGTCAGTCACAACTATACCAACTGTTGGTTTTAATGTGGAGACAGTTTCCTACAAAAATGTCAAATTCAATGTTTGGGATGTTGGTGGACAAGATAAGATTCGCCCATTATGGCGTCACTATTACAATGGAACCCAGGGACTA…	CCHX2766.b1_c_s	GGGGGACGCTAAGGTGTGTTTCAATTTGTAAAAATGGCGGAGCATTTTATACTTCAGTAACCAGATTTCCAAAGTCGTAAAGCCACCATTTCTTCAAATACTGACCCTAATTCGCGGACTAAGCGCCCAGGCTTAATACGTTACAATATGGGGAAGTTATTGTCCAAGATCTTTGGTAACAAAGAAATGAGAATTCTGATGTTAGGCCTAGATGCTGCTGGAAAAACAACTATTTTATACAAACTGAAACTTGGCCAGCCAGTCACTACTATACCAACTGTTGGTTTTAATGTGGAGACAGTTTCCTACAAAAACGTCAAATTCAATGTTTGGGATGTTGGTGGACAAGATAAGATTCGCCCATTATGGCGTCACTATTACAATGGAACCCAGGGACTA…	ADP-ribosylation factor 6 OS=Rattus norvegicus GN=Arf6 PE=1 SV=2; Accession=ARF6_RAT; E-value=6.0e-90	B0X466_CULQU	B0X466_CULQU	B0X466_CULQU	0.0546
SEQINDEX13743_C_c	ATCTGTTCCTATTCTTGAAAACATGGCTTCAAGGTCGTGTGCCTTTCTTTGGCTTTTTTTACTCCTTACAGCCGCTGTTATATTTGCCAATAAAGTAGACGAAGAAGAGACTTGCAGACGATATGCAAACGGACAAGTTTACCCTGAGAAAACAACGATTTCTGAGCATGCTGTCCATTGGAGTAAAGCTCAGATTTCTAAACCTGCACCTCATTGGGAAGGAACAGCAGTTGTGAATGGAAAGTTTAAAGAATTGAAATTAGAAGATTTTAAAGGGAAATATTTAGTGTTCTTTTTTTATCCTCTTGACTTTACGTTTGTTTGTCCTACCGAGATCATTGCTTTCAGCGATAGAATTGAGGAGTTCCGTGCAATTAACACAGAAGTGGTTGGTTGCTC…	Contig721	GGGGATTCTTGAAAACATGGCTTCAAGGTCGAGTGCCTTTCTTTGGCTTTTTTTACTCCTTACAGCCGCTGTTATATTTGCCAATAAAGTAGACGAAGAAGAGACTTGCAGACGATATGCAAACGGACAAGTTTACCCTGAGAAAACAACGATTTCTGAGCATGCTGTCCATTGGAGTAAAGCTCAGATTTCTAAACCTGCACCTCATTGGGAAGGAACAGCAGTTGTGAACGGAAAGTTTAAAGAATTAAAATTAGAAGATTTTAAAGGGAAATATTTGGTGTTCTTTTTTTATCCTCTTGACTTTACGTTTGTTTGTCCTACCGAGATCATTGCTTTCAGCGATAGAATTGAAGAGTTCCGTGCAATTAACACAGAAGTGGTTGGCTGCTCTGTAGA…	Peroxiredoxin-4 OS=Bos taurus GN=PRDX4 PE=2 SV=1; Accession=PRDX4_BOVIN; E-value=1.0e-102	A7SC77_NEMVE	A7SC77_NEMVE	A7SC77_NEMVE	0.0439
SEQINDEX9128_C_c	ATCAATAGCTCAAAAAAACAGGTTACTCTCAATTGTCCTATTGAGCACCCTTTCTTTGTTTATGGTCAAGGCTGGACTTCTTCCAGACCAGACCAATCACAAAGCAAGTACTCTCTAAGCTGTCATCTCCTAAAAGTGGGTGATGTGTGTATTTTCTTGTCACCATCTTCTGTTGGTGTTTCATTGTCAAGTGGGGCAACATCCCAAGTTGTTGCTGCTCCATCTGTCGTCATGTCAGTTCCTGTCAAATCAACAGCATCTGCAAGCTCCTCAAGCCAATCTACAAGCTCTGTTACAGTGTCTTGTCTGCCTGGAATGTCTACTGTACCAGCAAACATACCTGGTGTTGTTGCAACTTCGCCCCTGCCACATGGAATTCCTTCTGTACAACAAGGAAAT…	CCHX1816.b1_c_s	GGGCGGGACAGATGCAGCATATGTGCATATTACCTTTACCATCAATAGCTCAAAAAAACAGGTTACTCTCAACTGTCCTATTGAGCACCCTTTCTTTGTTTATGGTCAAGGCTGGACTTCTTCCAGACCTGACCAATCACAAAGCAAGTACTCTCTAAGCTGTCATCTCCTAAAAGTGGGAGATGTGTGTATTTTCTTGTCACCATCTTCTGTTGGTGTTTCATTGTCAAGTGGTGCAACATCCCAAGTTGTTGCTGCTCCATCTGTCGTCATGTCAGTTCCTGTCAAATCAACAGCATCTGCAAGCTCCTCAAGCCAATCTACAAGCTCTGTTACAGTGTCTTGTCTGCCTGGAATGTCTACTGTACCGGCAAACATACCTGGTGTTGTTGCAACTTC…	Ataxin-1-like OS=Mus musculus GN=Atxn1l PE=1 SV=1; Accession=ATX1L_MOUSE; E-value=5.0e-10	A7SUT3_NEMVE	A7SUT3_NEMVE	NA	0.0438
SEQINDEX8143_C_c	AACGTATGCGAGAGAATATCAACGATGCCTTCCATAGAAGATACCTTATTTCAACTGAAGTTTACAACGAAACAGTTGGAAAGGTTTTCAAAGAAAAGTGAGAAAGAAGAGAAAGCACAGCAAGCAAAAGTGAAAAAGGCCCTGCAGCAAAAGAACTTTGAAGGTGCAAAGATTTATGCCGAAAATGCAATTAGAAAGAAAAATGAAGGATTGAACTTTCTACGACTTGCCTCGCGTGTGGATGCAGTTTCCTCAAAAGTACAGAGTGCAATGATGATGAAACAAGTTACAAAAAACATGGACGGTGTTGTCAAAGGGTTGGATAAGGCCATGCAAACAATGGATCTAGAGAAGATTTCAGCTACCATGCAGAAGTTTGAAGGATTGTTTGAAGATATG…	Contig3014	GGGGATTATTTTTGGTGTTTCCGTCATGGTGGAGTGTTCAAAGTGAAGTTTCACAGCTAACGTATGCGAGAGAATATCAACGATGCCTTCCATAGAAGATACCTTATTTCAACTGAAGTTTACAACGAAACAGTTGGAAAGGTTTTCAAAGAAAAGTGAGAAAGAAGAAAAAGCACAGCAAGCAAAAGTGAAAAAGGCCTTGCAGCAAAAGAACTTTGAAGGTGCAAAGATTTATGCCGAAAATGCAATTAGAAAGAAAAATGAAGGATTGAACTTTCTGCAACTTGCCTCACGTGTGGATGCAGTTTCCTCAAAAGTACAGAGTGCAATGATGATGAAACAAGTTACAAAAAACATGGACGGTGTTGTAAAAGGGTTGGATAAGGCCATGCAAACAAT…	Charged multivesicular body protein 1a OS=Pongo abelii GN=CHMP1A PE=2 SV=1; Accession=CHM1A_PONAB; E-value=5.0e-52	A7SQW1_NEMVE	A7SQW1_NEMVE	A7SQW1_NEMVE	0.0387
SEQINDEX13225_C_c	ACGCAAAAGTAGTCCTTCTCGGAAAGGAATTCAGTGGAAAAACCAGTTTAGTCGAGCGATATTTACACGAGAGGTTCAACGAAAATGTTCCTTATCAAAATACCATAGGTGCAGCCTTTGGTGCTAAGAAAATTACTGTAGGTAACAAAAGTGTAACATTGGGGATTTGGGATACAGCTGGTTCTGAAAGGTATGAAGCAATGAGTCGCATTTATTACCGTGGGGCAAAAGCAGCAGTTTTATGCTATGATCTCACAGACAAGTCCAGTTTTGAACGAGCCAAGTTTTGGGTGAATGAATTGAAGACTTATGAAGATAATTGTAAAATATACCTTTGTGGCACCAAGCATGATTTAGTTCAGAGTGATAAAAAATCTCGGCAGGTTGACTACCACACTA…	Contig2377	AGTCCTTCTCGGAAAGGAATTCAGTGGAAAAACCAGTTTAGTCGAGCGATATTTACACGAGAGGTTCAACGAAAATGTTCCTTATCAAAATACCATAGGTGCAGCCTTTGGTGCTAAGAAAATTACTGTAGGTAACAAAAGTGTAACATTGGGGATTTGGGATACAGCTGGTTCTGAAAGGTACGAAGCAATGAGTCGCATTTATTACCGTGGGGCAAAAGCAGCAGTTTTATGCTATGATCTCACAGACAAGTCCAGTTTTGAACGTGCCAAGTTTTGGGTGAATGAATTGAAGACTTATGAAGATAATTGCAAAATATACCTTTGTGGCACCAAGCATGATTTAGTTCAGAGTGATAAAAAATCTCGGCAGGTTGACTACCACACTACAACTGATTA…	Ras-related protein Rab-24 OS=Homo sapiens GN=RAB24 PE=2 SV=1; Accession=RAB24_HUMAN; E-value=3.0e-64	A7RLB7_NEMVE	A7RLB7_NEMVE	A7RLB7_NEMVE	0.0379
SEQINDEX10483_C_c	GCACGAGCACGAGTCCGCATTGTGGTACAGTAATTTAATGTAAAGGTGGTCAACATTTGGGAATAATCTTGTGCTATTTCTCTGTAATGATGTATGCGCAATCAGATGAATACGCAGAAGGGCAGTATCCTAATCCTGATGAAGGACCATATGCTGCAGAGTACGAGCCCCCTAAACATGGCCAGATGTATGGGCACGAGTCTGGAGAAAATCCCCCTACATATACTTACAAGGTCCCTGAGGAAATAAGAGGATTCATTCGCTATTTCCATCAGCATGTCACTGAACAGAACCTATATGAAATACAGTCCATCTATGAAACAGGGTTCAACAAATTAACAGAGAGGCACTATGAAAAATCTCCCTGGCCAGAAGCTGATTATGTGGCTTCTATTGTTG…	CCHX7579.b1_c_s	GGGCATTTATGAAACAGGGTTCAACAAATTAACAGAGAGGCACTATGAAAAATCTCCCTGGCCAGAAGCTGATTATGTGGCTTCTATTGTTGATGGAGATCAAGTGTTTTTGATTCTTTACAAAGAGCTGTATTACAGACATATCTATAACAAGCTCAAGCCAACACTGGACCAACGTTTTGAATCTTATTTCAACTACTGTGACTTATTTAACTACATATTGAACACAGATGAACCAGTTCCTCTCAGCCTTCCTAATCAGTGGTTGTGGGATATTATTGATGAGTTTATTTACCAGTTCCAATCTTTCAGTCAGTATCGGTCAAAGTTGCTGAAAAAGGGAGAAGATGAGGTGGCAACTCTCAGGGCCAACACTAAGATTTGGAATGTTCGCAGTGT…	Eukaryotic translation initiation factor 3 subunit E-interacting protein OS=Danio rerio GN=eif3eip PE=2 SV=1; Accession=IF3EI_DANRE; E-value=0.0e+00	A7SDW5_NEMVE	A7SDW5_NEMVE	A7SDW5_NEMVE	0.0309
SEQINDEX8374_C_c	TGCCTCCTTACATGCGAGGGCCACCTGGACAGAAGTTTGTTGTCAGCCATTCAACATTTGATCCAATTCTGGCTGAGAACTTTTTTCCAAGAACCGTACCTGCATCAGATGAAATAGCTTTTACACAGGCTCTTTTGAAAAGGAACCAAGAGCTTACACCAAGTGGCCAGGAACAGGCTTCAGTCCAGAATCTTGTGACAAAGGTTACCACTGTGTTAGATAATCTGATTGTTACTCCAGAGGCTGCTGATCTGGGTGTTGAGGAAGTGCGTGCCGTTGGATCCTTTAAAAAAGGAACAATGTTGCTTGGCCATCCTGTTGCCGATTTGGCTGTTATATTAAAAAACTTACCAACAGAGACCATCATCCTAACCTTAGCCACTAAAGTACAGAAATCGT…	Contig687	GGGGAGACGCCGGCGTGCAGGAGTGAACGCGAACCTTTCATTTCTTCCATTTTAAAGTTACTTGAAATCATGCGTCGTGGTCGTCCAAGAGGAATGCGTGGAGGTCCTGGTAGGATGCCTCCTTACATGCGAGGGCCACCTGGACAGAAGTTTGTTGTCAGCCATTCAACATTTGATCCAATTCTGGCTGAGAACTTTTTTCCAAGAACCGTACCTGCATCAGATGAAATAGCTTTTACACAGGCTCTTTTGAAAAGGAACCAAGAGCTTACACCGAGTGGCCAGGAACAGGCTTCAGTCCAGAATCTTGTGACAAAGGTTACCACTGTGTTAGATAATCTGATTGTTACTCCAGAGGCTGCTGATCTGGGTGTTGAGGAAGTGCGTGCCGTTGGATCC…	Interleukin enhancer-binding factor 2 OS=Pongo abelii GN=ILF2 PE=2 SV=1; Accession=ILF2_PONAB; E-value=5.0e-93	A7SMG3_NEMVE	A7SMG3_NEMVE	NA	0.0282
SEQINDEX8962_C_c	AATGGCTACACGCAAAGAAACAGACAGCTTTGGGGAAATAGAAGTACCTGGAGACAAGTATTATGGTGCCCAAACTGCACGATCAAAATTGAATTTCCCAATGGTGATGAAAGTGAAAACATGCCAGCTCCTGTGATCCGTGCCTTTGGCATCCTCAAAAAAGCTGCTGCTGAGGTTAACAAGGAGTTTGGTTTAGATGAAAATGTTGCCAATAATATCATGAAGGCAGCAGATGAGGTTATATCAGGTAAATTAAAGGACAATTTTCCACTTGTGGTTTGGCAAACTGGCTCAGGTACACAGTCTAACATGAATGTCAATGAGGTCATCAGTAACCGTGCAATTGAGCTGATGGGGGGCCAGATGGGTTCCAAGAAACCTGTACACCCTAATGACCAC…	Contig2447	GGGGGAGGTCCCAGTTTTTACTCCTCGGGAATGGCGTTCAGGTCGTGTTCCGTGTTAAGAACATTGACAAGAAATCCCCGACTTTCTCTTCGTCGAAAAAAGCTATATTGTTGCTCTGTGGCGCTATCACGAACAATGGCTACACGCAAAGAAACAGACAGCTTTGGGGAAATAGAAGTACCTGCAGACAAGTATTATGGTGCCCAAACTGCACGATCAAAATTGAATTTCCCAATAGGTGATGAAAGTGAAAACATGCCAGCTCCCGTGATCCGTGCCTTTGGCATCCTCAAAAAAGCTGCTGCTGAGGTTAACAAGGAGTTTGGTTTAGATGAAAATGTTGCCAATAATATCATGAAGGCAGCAGATGAGGTTATATCAGGTAAATTAAAGGACAAT…	Fumarate hydratase, mitochondrial OS=Macaca fascicularis GN=FH PE=2 SV=1; Accession=FUMH_MACFA; E-value=0.0e+00	A7SYK1_NEMVE	A7SYK1_NEMVE	A7SYK1_NEMVE	0.0261
SEQINDEX3044_C_c	TGTTGTGAAGGGTTTTACTCTATTTTTTCGGTGTTTTTGTATTCAATATTTTAAAAATGATGTCTCAGACAGAACTCTTAGCGTGGTCAGAGCCGGACACAAAATTTTTTGCCGACAATCTGCTTGGAGTGGAAGATTGGGGAGACTCAATTACCGAAGGAAAATTCAATCCAGACGAGTTGCTTTGGGAAAATAAAGATCAAGGTCTGGAATTTGAAAGCAAGGATGATCATTTTAATGAATTTTTATCCAGTCTCGGAACATATCCACCTTCTCCCATGCTTGAAGATGTCAATTTTACTTCTAGTGTATGCATAAAAGAAGAACCTCTCTCTCCTTCAACATCTAATTCTTCATTTACTTCGCTTCCAAGTTCACCTGAGAACCAGTTCTTATTAA…	Contig360	GGGGTTGTCCAAGTTGGTTTAACAAAACAGAAGTAAACAGGATTAATGAAGCTCTTGATGGGTGGGTTAAAAGATACGCGGATGAACGTTTGTCAAAGCAGAAAAAACAAAGACGAAGGAAAACCAAGATGGAATCAAGCATCAGGGAACTTGCTTTGAGAATTGCATCCAACTGCACTTCAGACGTGAAGCGAATGATAAGCAGGCACAAGTTTTCTCGGAAACATAATTCAGCCTCCGTGAATGCGGTTCAGCTGTTTCAAAGCGCAGACACAATCAAGTCTTTTGAAGAGGAAATTAACAGAAAATCCGATACTCTTTACGTTGTATCTTTTCGCAGAGATCATTTAGTATTGCCTGCAACGGAATTCAACTCCACTCAAAGGCCTAAGATGTCTT…	Cyclic AMP-dependent transcription factor ATF-6 alpha OS=Homo sapiens GN=ATF6 PE=1 SV=3; Accession=ATF6A_HUMAN; E-value=9.0e-21	A7SH81_NEMVE	A7SH81_NEMVE	NA	0.0195
SEQINDEX6512_C_c	TCGATGTTGGAAATGAAGTTTCTGTGTCAGATATAGATATAGATATTTATGAAGATATAAAGCAGATGTAGGATGGATTTAGAACTTCCTGCCGGCTTCACAGACCTGCTACAAGAGTTTACGGTCCAAGTTTTGCAAGAAAAGCCTGACGATATTATTGAGTTTGCTGCTAGTTATTTCATGAAGCTCAAACTAAAAGAAAAACGCTCCAAGGATGGATCAAAAGGGAAATCCAAAGGTGTTAACTTTCAAGGTGGAGAAATGAATGGCGATGGAAGCTCAGATGATGAGGAAGATGAAGACTTCGAACCACCGAAGAACCGTTACGCAAGGCGGCAATCTGTTTGTGCTGAGCCACTTAATCCAGACTCTGATGAGGATGAAAATCCGATTGTTTAT…	Contig2238	GGGGAAAGAGGTCAACGGCGAAGTCGATGTTAGAAATGAAATTTCTGTGTCAAATATAGATATAGATATTTATGAAGATATAAAGCAGATGTAGGATGGATTTAGAACTTCCTGCCGGCTTCACAGACCTGCTACAAGAGTTTACGGTCCAAGTTTTGCAAGAAAAGCCTGACGATATTATTGAGTTTGCTGCTAGTTATTTCATGAAGCTCAAACTAAAAGAAAAACGCTCCAAGGATGGATCAAAAGGGAAATCCAAAGGTGTTAACTTTCAAGGTGGAGAAATGAATGGCGATGGAAGCTCAGATGATGAGGGAGATGAAGACTTCGAACCACCGAAGAACCGTTACGCAAGGCGGCAATCTGTTTGTGCTGAGCCACTTAATCCAGACTCTGATG…	cAMP-dependent protein kinase type II regulatory subunit OS=Strongylocentrotus purpuratus PE=2 SV=1; Accession=KAPR_STRPU; E-value=2.0e-96	A7SDH8_NEMVE	A7SDH8_NEMVE	A7SDH8_NEMVE	0.2372
SEQINDEX4766_C_c	CGTTCAAAGCTATAAATCAAGGCGGACTCACATCAATTGGTCTTCGTGGGGCTGACTCAGCAGTTGTTGTCACTCAAAAAAAAGTGCCCGACAAACTCCTAGATTCTAACTCCATGACGCACTTGTTTGAATTGTCAGACAGAATTGGCTGTGTCATGACTGGATTGATAGCTGATGCTCGTTCCCAGGTTCAAAGAGCTAGATATGAGGCAGCAAATTGGAAGTACAAATATGGTTACGAAATTTCTGTTGATATGCTGTGTAAAAGAATTGCTGATATTTCACAAGTGTACACTCAGAATGCTCAGATGAGACCTCTTGGATGCAGTATGATTCTCATTGGCATTGATGAAGAAAAAGGGCCCCAGCTGTACAAAACTGATCCAGCTGGGTACTACT…	Contig11	GGGGAGCGGTGAAAGATGTCGCGTGGTACCAGTGCAGGCTTTGACCGTCATATTACTATTTTTTCTCCAGAGGGACGGCTGTATCAAGTTGAGTATGCGTTCAAGGCTATAAATCAAGGCGGACTCACATCAATTGGTCTTCGTGGGGCTGACTCAGCAGTTGTTGTCACTCAAAAAAAAGTGCCCGACAAACTCCTAGATTCTAACTCCATGACGCACTTGTTTGAATTGTCAGACAGAATTGGCTGTGTCATGACTGGATTGATAGCTGATGCTCGTTCCCAGGTTCAAAGAGCTAGATATGAGGCAGCAAATTGGAAGTACAAATATGGTTACGAAATTCCTGTTGATATGCTGTGTAAAAGAATTGCTGATATTTCACAAGTGTACACTCAGAAT…	Proteasome subunit alpha type-6 OS=Rattus norvegicus GN=Psma6 PE=1 SV=1; Accession=PSA6_RAT; E-value=9.0e-97	A7RIX7_NEMVE	A7RIX7_NEMVE	A7RIX7_NEMVE	0.2042
SEQINDEX8732_C_c	GATTGTTGATAAATTTCTTTTAGCTCGTTAAATTCGTACGAGAAAACGTGGAGTGAAATCCCTCAAATTTACACATGAATCTTGCTGCTTATGGCGGGGATGCAACGGGAAATTTACTGTGCGTCAATTTTAATCAAGACTACAGCTCTCTGGCAGTTGGATCAAAGTCCGGCTATAAATTGTTCTCTTTAAACTCAGTGGAGAAGTTAGAAGAAATTTATGACTATGGAGAGACAGAGGATGTCTGCATAGTGGAGAGATTGTTTTCTAGTAGCCTGGTAGCTATTGTTAGTTTATCTGCACCCAGAAAACTCAAAGTTTGCCATTTCAAGAAAGGCACAGAAATATGCAATTACAGTTATCCAAACACAATTTTAGCTGTCAGACTAAATAGAGTGA…	AOKF1628.b2_c_s	GGGGACAGGACAACTCCACCAACCTCGTACTGTATTGTGGGTAGTCTGTTCGCCAGTCACGCGCATGTCTTAAGCGTGTGTTGTTATTGTTGAAGTGATTGTTGATAAATTTCTTTTGCTCGTTAAATTCGTACGAGAAAACGTGGAGTGAAATCCCTCAAATTTACACATGAATCTTGCTGCTTATGGCGGGGATGCAACGGGAAATTTACTGTGCGTCAATTTTAATCAAGACTACAGCTCTCTGGCAGTTGGATCAAAGCCCGGCTATAAATTGTTCTCTTTAAACTCAGTGGAGAAGTTAGAAGAAATTTATGACTATGGAGAAACAGAGGATGTCTGCATAGTGGAGAGATTGTTTTCTAGTAGCCTTGTAGCTATTGTTAGTTTATCTGCACC…	WD repeat domain phosphoinositide-interacting protein 2 OS=Gallus gallus GN=WIPI2 PE=2 SV=1; Accession=WIPI2_CHICK; E-value=1.0e-147	A7SCQ4_NEMVE	A7SCQ4_NEMVE	Q6ZV51_HUMAN	0.1588
SEQINDEX8602_C_c	ATGTAAACTTTCTTTGAAATATTTTGACCAGGCCGTACGTAAACAAAGGAGGATTTCTTTACTACAGAAATGGCTGCCTCGCATCCGAACATTAGCTTTTATTCCCGACTATGTGGAAAGGAAGGGATCTCTTTTCTTGCGATCGGACCACATGGACTATTCCCGACCTACGCTAGTGTCGAATTGGCATCAGGCAAGAGAAGCAGAACCGAAAGACTACGATATAAAAGATTATCAACCACAGAAAAGAGATCTTCACAATTCTACATACCATCGAATTGGAAATGTCACCGATGGATCTTTCCCCAATACCACAAGTCATGAACAAATGGAACAGGCAGTGAAATTTAAAAGTGATTTTGAAACAAGGGAAACCAGACGGCAGATGGTTGACATGGA…	Contig3397	GGGGGAAACATTTTGACCAGGCCGTACGTAAACAAAGGAGGATTTCTTTACTACAGAAATGGCTGTCTCGCATCCGAATCCATTAGCTTTTATTCCCGACTATGTGGAAAGGAAGGGATCTCTTTTTTTGCGATCGGACCACATGGACTATTCCCGACCTACGCTAGTGTCGAATTGGCATCAGGCAAGAGAAGCAGAACCGAAAGACTACGATATAAAAGATTATCAACCACAGAAAAGAGATCTTCACAATTCTACATACCATCGAATTGGAAATGTCACCGATGGATCTTTCCCCAATACCACAAGTCATGAACAAATGGAACAGGCAGTGAAATTTAAAAGCGATTTTGAAACAAGGGAAACCAGACGGCAGATGGTTGACATGGACACTTTTAA…	Uncharacterized protein C9orf135 OS=Homo sapiens GN=C9orf135 PE=1 SV=1; Accession=CI135_HUMAN; E-value=5.0e-40	A7SBZ6_NEMVE	A7SBZ6_NEMVE	A7SBZ6_NEMVE	0.0779
SEQINDEX2237_C_c	TTGAGGAACCATTGACATGACGGCCATTAGAAAGAAGCTGGTGATTGTTGGTGATGGTGCCTGTGGCAAAACCTGCCTCCTGATTGTGTTCTCTAAAGATCAGTTTCCTGAAGTTTATGTGCCAACAGTTTTTGAAAATTATGTTGCCGATATTGAAGTTGATGGCAAGACTGTAGAGCTGGCATTATGGGATACAGCGGGACAAGAAGATTACGACAGACTACGTCCACTGTCCTACCCTGATACAGATGTTATTTTGATGTGCTTCTCCATCGATAGCCCCGATAGTTTAGAAAACATCCCTGAAAAATGGACTCCTGAAGTGCGGCATTTTTGTCCAAACATACCCATCATTCTGGTTGGCAACAAAAAGGATCTCAGGAATGATGAAAAAACCAA…	Contig4666	GGGGGATCAAGTCTCCGGCCATTTCCTGAAATCTGAGTTCGAGGGTTCTGGCACACAGCAAGGAATAGTTTACTTGGTTTTTGGAAGGTTGAGGAACCATTGACATGACGGCCATTAGAAAGAAGCTGGTGATTGTTGGCGATGGTGCCTGTGGCAAAACCTGCCTCCTGATTGTCTTCTCTAAAGATCAATTTCCTGAAGTTTATGTGCCAACAGTTTTTGAAAATTATGTTGCTGATATTGAAGTTGATGGCAAGACTGTAGAGCTGGCATTATGGGATACAGCGGGACAAGAAGATTACGACAGACTACGTCCACTGTCCTACCCTGATACAGATGTTATTTTGATGTGCTTCTCCATCGATAGCCCCGATAGTTTAGAAAACATCCCTGAAAAAT…	Ras-like GTP-binding protein RHO OS=Aplysia californica GN=RHO PE=2 SV=1; Accession=RHO_APLCA; E-value=7.0e-88	Q1EPR7_BRABE	Q1EPR7_BRABE	Q4JHP7_BIOGL	0.0727
SEQINDEX12738_C_c	TAACACGTTGGCAATCCTCCATGGCGGCTGTCTGTAGTTTCTCTTTCCTCGCGCGAAAGTTTACGCCTCAAATACTTCGAAGTTCTCGATACACCATCAATTCACATCACTTCAGAAAAGGCAGTCCTATAGCCAACACATTCCAGAGAGCGTTCTCTTTGCAAAGCCCAAAAATGAGCAAAGCCTTCATCCAAAAACCTGCGCCTGCATTCTCCGGCACGGCTGTCAACAAGTACGGGGAATTTATTGATATCAAACTTTCCGACTATGCAGGGAAATATCTGGTCCTGTTCTTCTATCCCCTTGATTTCACCTTTGTTTGTCCAACGGAGATCCTGGACTTCAGTAAAAAGGCTGAAGAGTTTCGTGCTATAAACTGCGAGCTTGTTGCCTGCTCTG…	Contig1931	GGGGAGTGCGGTCTGAAGTCCGCATTTGTACCCTTCTTCCTGGTCTTTTTGCAAGCCCAAAAATGAGCAAAGCCTTCATCCAAAAACCTGCGCCTGCATTCTCCGGCACGGCTGTCAACAAGTACGGGGAATTTATCGATATCAAACTTTCCGACTATGCAGGGAAATATCTGGTCCTGTTCTTCTATCCCCTTGATTTCACCTTTGTTTGTCCAACGGAGATCCTGGACTTCAGTAAAAAGGCTGAAGAGTTTCGTGCTATAAACTGCGAGCTTGTTGCCTGCTCTGTGGACTCCCAATACTCTCATCTTGCTTGGACCAATGTAGAACCCAAGAAGGGAGGTCTTGGACACATCAACATTCCTCTCCTCTCCGACATCACAAAACAAATCTCCAAAG…	Peroxiredoxin OS=Cynops pyrrhogaster PE=2 SV=1; Accession=TDX_CYNPY; E-value=2.0e-78	A7RK73_NEMVE	A7RK73_NEMVE	A7RK73_NEMVE	0.0553
SEQINDEX3875_C_c	GCACGAGGAGCAATTTACGTCTCCAAAAGCGGCTGGCAGCCAGTGTTCTCAAGTGCGGTAGGAAAAAGATATGGTTGGATCCCAATGAAACCAATGAAATTGCGAATGCAAACTCAAGGCAGAACATTCGCAAGCTTATTAAGGATGGCTTGATCATCAAAAAGCCTCAGATCATCCACAGTCGTGCCCGTGCTCGAAAGGCAGCTGAAGCCAGGAGAAAGGGACGTCACAGTGGTTATGGTAAGCGCAAGGGTACAGCCAATGCTCGTATGCCTCAAAAAGTCATTTGGATGAGGCGTATGCGAGTCCTCAGAAGGCTTCTTCGGAAATACAGAGAAATGAAGAAAATCGACCGCCACATGTATCATGAGCTTTACAAAAAGGCAAAGGGAAATGTGT…	Contig2899	GGGGGCACTACCACGTTCTTCCCTTCTATGTGGCCGCCATTATGAGCAATTTACGTCTCCAAAAGCGGCTGGCAGCCAGTGTTCTCAAGTGCGGTAGAAAGAAGATATGGTTGGATCCTAATGAAACCAATGAAATTGCAAATGCAAACTCAAGGCAGAACATTCGCAAGCTTATTAAGGATGGCTTGATCATCAAAAAGCCTCAGATCATCCACAGTCGTGCCCGTGCTCGAAAAGCAGCTGAAGCCAGGAGAAAGGGACGTCACAGTGGTTATGGTAAGCGCAAGGGTACAGCCAATGCTCGTATGCCTCAAAAAGTCATTTGGATGAGGCGTATGCGAGTCCTCAGAAGGCTTCTTCGGAAATACAGAGAAATGAAGAAAATCGACCGCCACATGT…	60S ribosomal protein L19 OS=Drosophila melanogaster GN=RpL19 PE=1 SV=2; Accession=RL19_DROME; E-value=3.0e-60	A7T1P0_NEMVE	A7T1P0_NEMVE	A8BH63_GIALA	0.0487
SEQINDEX9865_C_c	AAGAGATAGATCATGCTTGCGTTAATTAGACGCCAGTGTAACCCTGCAGGAAGACGTAACTCTAAGGTTCTGCAACGCCTCGTGTCTTACCTTCAAGGTCAATCACCATTTCCTAACTCGCGAGAGTACTTTTACTATATTGATCACCAGGGGCAGCTATTCCTTGATGACACCAAAGTAAAAAACTTCATAACATGCTTCAAAGACAAACAATTCCTCAAGTTTTTCTTCAAAAGACTAAAGAAAAACCAAACAGACAGATACAAAGAAGATTTTCCATTCATTTCACCTTGTGGCCGGGAATTGAACTACATTCGCTGCGATGATTTACCAGTTGTTTTTGCTACAATCATTGAAGATCCTGATGACATTAAAGCACCTGGACAGTTAACATTTAGC…	CCHX4824.b1_c_s	GGGGATAATGCTTTGAATAAGTCAAAACAAAGAGAAAAAAAAATATTGATGTGTTGAAAAGAGATCCTTGTTACAATTTCTTTTGCGTGGAAGAGATAGATCATGCTTGCGTTAATTAGACGCCAGTGTAACCCTGCAGGAAGACGTAACTCTAAGGTTCTGCAACGCCTCGTGTCTTACGTTCAAGGTCAATCGCCATTTCCTAACTCGCGAGAGTACTTTTACTATATTGATCACCAGGGGCAGCTATTCCTTGATGACACCAAAGTAAAAAACTTCATAACATGCTTCAAAGACAAACAATTCCTCAAGTTTTTCTTCAAAAGACTAAAGAAAAACCAAACAGACAGGTACAAAGAAGATTTTCCATTCATTTCACCTTGTGGCCGGGAATTGAAC…	UPF0598 protein OS=Homo sapiens PE=2 SV=2; Accession=U598_HUMAN; E-value=1.0e-44	A7SV11_NEMVE	A7SV11_NEMVE	NA	0.0458
SEQINDEX5503_C_c	CAGCTTTGCAGACAGCCGACTGTGCACAAAATTCATCAGTGATAACGAACGATTAACATTCCCGCTATGAATCCAGAATATGATTATTTGTTCAAGCTTCTACTTATCGGAGACTCTGGCGTTGGGAAATCATGCCTTCTTCTTCGGTTTGCGGACGACACGTACACAGAGAGCTACATAAGCACAATCGGCGTCGATTTTAAAATAAGAACCATAGAATTAGATGGCAAAACAATAAAGCTGCAAATTTGGGACACGGCAGGCCAAGAGCGATTCCGAACGATCACTTCTAGTTACTACCGGGGTGCTCATGGAATTATCGTCGTTTATGATGTTACAGATCAGGAATCCTTTAACAATGTCAAGCAGTGGTTACAGGAAATCGACCGGTATGCTTGT…	Contig2034	GGGGAACCGTACCTTGTGCCATCTTCGGTCTTCGTAGATATTTGCCGGTGTTTTACCATCATTTGAGAGGAAACTTCAGCTTTACAGCCAGCCGACTGTGCACAAAGTTCATCAGTGATAACGAACGATTAATATTCCCGCTATGAATCCAGAATATGATTATTTGTTCAAGCTTCTACTTATCGGAGACTCTGGCGTTGGGAAATCATGCCTTCTTCTTCGGTTTGCGGACGACACGTACACAGAGAGCTACATCAGCACAATTGGCGTCGATTTTAAAATAAGAACCATAGAATTAGATGGCAAAACAATAAAGCTGCAAATTTGGGACACGGCAGGCCAAGAGCGATTCCGAACGATCACTTCTAGTTATTACCGGGGTGCTCATGGAATTATCGT…	Ras-related protein ORAB-1 OS=Discopyge ommata PE=2 SV=1; Accession=RAB1_DISOM; E-value=2.0e-96	A7S806_NEMVE	A7S806_NEMVE	A7S806_NEMVE	0.034
SEQINDEX8253_C_c	GCACGAGCCAAAGTTGAGGAAGAGGATTCAGTCTCTTTGTTTGACAGACAGTTATTGAAGGAAGTTGATCTCAGGAAAGGAGAATGCAAATTACATAACTGTGGTTTAGCTGTCAATAATCCTGGTGATAATTTAGTGTTAAGGCCATTATGCAGTGATGATTATGAAAAAGGGTTTGTCACACTTTTAAGTCAGCTTACTAAGGTTGGAGATGTCACAAAGGAAATGTTTCTAAAGCGCTTCCATGCCATGAGGTCATGTGCTGGCACGTATTATCTCATTGTTCTTGAGGACACCAAGTTAGAAAAGATAGTTGCCAGTGGAACACTTATAGTAGAACAAAAATTTATCCATGAGGCTGCTGTGCGAGGAAGAATAGAAGACATTGTAGTTGACAAC…	Contig3542	GGGGACGACACGTTCCCTGGCAATTTTGACTTCCTGCAAACATGGCGAAAGTCGAGGAAGAGGATTCAGTCTCTTTGTTTGACAGACAGTTATTGAAGGAAGTTGATCTCAGGAAAGGAGAATGCAAATTACATAACTGTGGTTTAGCTGTCAATAATCCTGGTGATAATTTAGTGTTAAGGCCATTATGCAGTGATGATTATGAAAAAGGTTTTGTAACACTTTTAAGTCAGCTTACTAAGGTTGGAGATGTCACAAAGGAGATGTTTCTAAAGCGCTTCCATGCCATGAGATCATGTGCTGGCACGTATTATCTCATTGTTCTTGAGGACACCAAGTTAGAAAAGATAGTTGCCAGTGGAACACTTATAGTAGAACAAAAATTTATCCACGAGGCTG…	Glucosamine 6-phosphate N-acetyltransferase OS=Pongo abelii GN=GNPNAT1 PE=2 SV=2; Accession=GNA1_PONAB; E-value=8.0e-42	A7S7U8_NEMVE	A7S7U8_NEMVE	NA	0.0289
SEQINDEX10054_C_c	CGTAGTGAACTAACCCTTGAACATTACAGTCTCCATACACCAAGTACCTACAAGGTGACTTACCATTGCCGCTAGCCGCTCGAGTTGCGACCATCATGGCGGTCAGCCCACAGTAGGAAACGACGCTCGCAATTTTTTAATGGCACTCGATGGAGAAGAAAGCACGCCAGTGCCAAACCTGGCACTGGAAACGATTGTCAAGCCAGCACTTCGCGAGTTGGAGCCTTCCTATGACACAGAAATGGTCAAAAAGCTGGGAGCTGCTTTTGCTAAGGCTGAGAAGGAGATTCCAGGTGTCACACAACAAATTGTTGGAGAAATTATGAAATCAGCACACTTTAACTTGCCCGTAAACATGAATGAAATTCTTCTCCTTTGTGCTGCAAACAACAGTCAAGA…	Contig3574	GGGGGAGTTTAGCCATCATGGCGGTCAGCCCACAGTAGGAAACGACGCTCGCAATTTTTTAATGGCACTCGATGGAGAAGAAAGCACACCAGTGCCAAACCTGGCACTGGAAACGATTGTCAAGCCAGCACTTCGCGAGTTGGAGCCTTCCTATGACACAGAAATGGTCAAAAAGCTGGGAGCTGCTTTTGCTAAGGCTGAGAAGGAGATTCCAGGTGTCACACAACAAATTGTTGGAGAAATTATGAAATCAGCACACTTTAACTTGCCCGTAAACATGAATGAAATTCTTCTCCTTTGTGCTGCAAACAACAGTCAAGATTATTCTTTCGCTATTAAAGAACTTGAGTTTGCTTCATTGTCAAAGAAAGCAAAAGATCTGAAGGCTATCCTGGCAAA…	Programmed cell death protein 10 OS=Xenopus tropicalis GN=pdcd10 PE=2 SV=1; Accession=PDC10_XENTR; E-value=4.0e-37	A7SN69_NEMVE	A7SN69_NEMVE	A7SN69_NEMVE	0.1891
SEQINDEX19345_C_c	GCACGAGGGAGTTGTGATGGTGGGTCGCCATTTCATCGCCACTTCATGTGTTGTTTTTGTATAATATGTGGACTTGAGCAATTTCCCCTCCGCGTTTCTTGAAATGATGAATGTTAGTGTACGTGCTACGTTCATTTCGTCTTCGTTTATTCATTGATGGCGGAGGGATTGAACAATGATATGAGCGAACAACAACAACGCCAGCAGCCTCCACATGGCCAAGAGGCGGATCGCTCTCATCAAGTACAGTTTGTCGTTCCGGCGACAAATGTACAAACTGGGGTTGCAACTCAACCTAAAACAAGTTCAAATATTCTAGCATCTAACCCAGGGCACAAGAAAAAAAGTTCTTTTCAAATTACTCGTGTCATCGAGACAAAAACCCGCAATCGTGGCGAT…	CCHX12463.b1_c_s	AGGGGCGAAGAGTTGTGATGGTCGGTCGCCATTTCATCGCCACTTCATGTGTTGTTTTTGTATAATATGTGGACTTGAGCAATTTCCCCTCCGTGTTTCTTGAAATGATGAATGTTAGTGTACGTGCTACGTTCATTTCGTCTTCGTTTATTCATTGATGGCGGAGGGACTGAACAATGATATGAGCGAACAACAACAACGCCAGCAGCCCCCACATGGCCAAGAGGCGGATCGCTCTCATCAAGTACAGTTTGTCGTTCCGGCTACAAATGTACAAACTGGGGTTGCAACTCAACCTAAAACAAGTTCAAATATTCTAGCATCTAACCCAGGGCACAAGAAAAAAAGTTCTTTTCAAATTACTCGTGTCATCGAGACAAAAACCCGCAATCGTGGCGA…	NA	A7SEF8_NEMVE	A7SEF8_NEMVE	NA	0.108
SEQINDEX4315_C_c	CAAGCGGCAGAAGTATTATCCGTATGAAAGATGACCAAGATAAAATGTTCAAACTAAGCAGCAAGTTACTGATGTTAGTAACAGGTGAGGCGGGAGACACAGTACAGTTTGCTGAGTACATTGAAAAAAATATACAGCTCTACAAGATGAGAAATGGATACGAACTTACTCCACATGCTGCTGCTAACTTTACAAGACGCAACTTGGCAGATTCGTTGCGGAGCTCTTCCGCTTACCAGGTCAACATGTTGATTGCTGGATTTGATGATGCCAGTGGCCCAGCACTGTATTTCATGGATTGGCTGGCCTCACTTCAAAAGGTGCCATTTGGAGCACATGGTTATGGTTCGTTCTTTTCCTTGAGTATAATGGACAGGTATTACAAACCAGACTTAAGCC…	Contig954	GGGGAAGTCTAAGAAAGATTCAAGCCAAAATGGAGTGTTTGATTGGAATTCAAGGTCCTGACTTCGTCTTGGTAGCTAGCGATTCTGCAAGCGGCAGAAGTATTATCCGTATGAAAGATGACCAAGATAAAATGTTCAAACTAAGCAGCAAGTTACTGATGTTAGTAACAGGTGAGGCGGGAGATACAGTACAGTTTGCTGAGTACATTGAAAAAAATATACAGCTCTACAAGATGAGAAATGGATACGAACTTACTCCACATGCTGCTGCTAACTTTACAAGACGCAACTTGGCAGATTCGTTGCGGAGCTCTTCCGCATACCAGGTCAACATGTTGATTGCTGGATTTGATGATGCCAGTGGCCCAGCACTGTATTTCATGGATTGGCTGGCCTCAC…	Proteasome subunit beta type-2 OS=Homo sapiens GN=PSMB2 PE=1 SV=1; Accession=PSB2_HUMAN; E-value=1.0e-59	A7STW4_NEMVE	A7STW4_NEMVE	NA	0.1076
SEQINDEX9216_C_c	CCAGAACGAGGAAAACNCTGAAACTGCCGANCATTGCGACGTCAGACGCCAAAGGAGAAGGCACTGAGAGTAAGAGCAATCAACAAGATGAAGTCGAGAAAGAAGTGAAATTATATGTGGGAAATCTTCCCGACCAGTGTAGACGAGGGGCCTTGCAAGAGCTCTTCGAAAAATACGGCAAGGTTTCGCAGTGTGACATTGTTAAAAACTTTGCATTTGTGCACATGGTTGGAGAAAAGAATGCTAAAGATGCTCTCGAAAGTTTAGATGATTCCGAGTTTTGTGGAACTCACATCCAAGTGCAATTTGCCAAATCCAAAGGGAAGCCATCAGAGGATGAGTGCTTTTCATGTGGAAAACATGGCCACTGGGCAAAAGACTGTCCTAGGAGAAGAAGGT…	Contig1178	GGGGTTCTTCAGCGGCAGCCATCTTGTTTCCTCCATTCGCTCTCGTCTCGTTGGTGCAGTTCAGCTCTTCAGTATGGCCAGCGAAGACGTTAGTCAAGACAATCTCGCAGAAGTCAAAAACCAGAACGAGGAAAACACTGAAACTGCCGACATTGCGACGTCAGACGCCAAAGGAGAAGGCACTGAGAGTAAGAGCAATCAACAAGATGAAGTCGAGAAAGAAGTGAAATTATATGTGGGAAATCTTCCCGACCAGTGTAGACGAGGGGCCTTGCAAGAGCTCTTCGAAAAATACGGCAAGGTTTCGCAGTGTGACATTGTTAAAAACTTTGCATTTGTGCACATGGTTGGAGAAAAGAATGCTAAAGATGCCCTCGAAAGTTTAGATGATTCCGAGTT…	RNA-binding protein 4 OS=Oryctolagus cuniculus GN=RBM4 PE=2 SV=1; Accession=RBM4_RABIT; E-value=3.0e-19	A7T285_NEMVE	A7T285_NEMVE	NA	0.0937
SEQINDEX6178_C_c	ACACGTTTGTTAGATGAAAGATGGATTTTCAGAATCGTGCTGGTGGAAAGACAGGCTCGGGTGGTGTTGCGTCATGGTCAGAATCAAACAGAGATCGCCGAGAACGTCTCAGGCAGCTTGCTTTGGAGACAATCGACCTCAATAAGGATCCATATTTTATGAAAAACCATCTTGGTTCCTATGAATGCAAGCTTTGTCTTACGCTACACAACAATGAGGGAAGCTACCTTGCTCATACACAAGGAAAAAAACATCAGTCGAACCTTGCTCGTCGTGCTGCAAAAGAGGCTAAGGAAGCACCGGCCCAACCAGCACCAGAAAAACCCAGGGTGTCTATTAAGAAGTTTGTGAAGATTGGTCGTCCAGGTTACAAAGTCACAAAACAAAGAGATCCAGACT…	CCHX4405.b1_c_s	GGGGAGTACCAATCCCGCGCAATTGTTCGGCCGCCATGATTTTAAAATCACAACGCTGAAGACACGTTTGTTAGATGAAAGATGGATTTTCAGAATCGTGCTGGTGGAAAGACAGGCTCGGGTGGTGTTGCGTCATGGTCAGAATCAAACAGAGATCGCCGAGAACGTCTCAGGCAGCTTGCTTTGGAGACAATCGACCTCAATAAGGATCCATATTTTATGAAAAACCATCTTGGTTCCTATGAATGCAAGCTTTGTCTTACGCTACACAACAATGAGGGAAGCTACCTTGCTCATACACAAGGAAAAAAACATCAGTCGAACCTTGCTCGTCGTGCTGCAAAAGAGGCTAAGGAAGCACCGGCCCAACCAGCACCAGAAAAACCCAGGGTGTCTATT…	Splicing factor 3A subunit 2 OS=Homo sapiens GN=SF3A2 PE=1 SV=2; Accession=SF3A2_HUMAN; E-value=8.0e-98	A7S618_NEMVE	A7S618_NEMVE	NA	0.0743
SEQINDEX466_C_c	CTTCGACAAGATGCCAAAAGCAGTGTGTAGTAAAACCTACACTACTCCAAGGCGTCCCTTTGAAAAGGAGCGCTTGAATCAAGAATTGAAGATTATTGGAGAATATGGGCTTCGCAACAAACGTGAAGTGTGGCGTGTTAAGTATACGTTGGCCAAAATTCGTAAGGCTGCCCGAGAGTTGTTGACGCTCGAAGAGAAAGACGCTAAGAGATTGTTCGAGGGTAACGCTCTTTTACGACGTCTTGTACGCATAGGCGTTCTGGATGAGAACCGAATGAAGCTCGATTACGTGCTAGGTCTTCGAATTGAAGATTTCCTGGAGAGACGTCTTCAGACACAAGTGTTTAAGCTTGGTTTGGCGAAGAGCATACACCACGCTCGAGTACTTATCAGGCAAAG…	Contig765	GGGGCTTTCTCCTCGCCATTTTGTCTTCGACAAGATGCCAAAAGCAGTGTGTAGTAAAACCTACACAACTCCAAGGCGTCCTTTTGAAAAGGAGCGCTTGAATCAAGAATTGAAGATTATTGGAGAATATGGGCTTCGCAACAAACGTGAAGTGTGGCGTGTTAAGTATACGTTGGCCAAAATTCGTAAGGCTGCCCGAGAGTTGTTGACGCTCGAAGAGAAAGACCCTAAGAGATTGTTCGAGGGTAACGCTCTTTTACGACGTCTTGTACGCATAGGCGTTCTGGATGAGAATCGAATGAAGCTCGATTACGTGCTAGGTCTTCGAATTGAAGATTTCCTGGAGAGACGTCTTCAGACACAAGTGTTTAAGCTTGGTTTGGCGAAGAGCATACACCA…	40S ribosomal protein S9 OS=Rattus norvegicus GN=Rps9 PE=1 SV=4; Accession=RS9_RAT; E-value=4.0e-86	A7SS49_NEMVE	A7SS49_NEMVE	A5DK91_PICGU	0.0577
SEQINDEX10754_C_c	CCGGGTGGGTAGAGACGCTACGAAGGTTTAACCAAAGGAAGATCGCAGAAAAAGACGCAAAAGCTGCTGATGAAGATCAAAACTTCCCCGGTGAGACCGATCTTTTCAGCAAGTACTATAATGAGTGGAAAGGGACAGGCAAAGTCAACTCATCAAAGAACTGTAATGGCATACCAAGGTTTTATTTTAAGCTTCCCTCCGAAGATGAGGTTTTATTGCAAAAACTGCGAGAGGAGGCAAGAGCAGTGTTTCTTCAGAGAAAAAGTCGAGAACTTCTTGATAATGATGAGTTACAGAATCTGTGGTTTTTACTTGACAAACATCATACACCACCAGTTATTGGAGATGATCAGATGATTAATTATGAAGACTTTTTGAAAGTTGGAGAAAAAGCAGGTG…	CCHX14915.b1_c_s	GGGGGCATTATCTTCCAAATTAAAACATGGCGGACGGAAGATGCTGACAACCTAATTTTCTATTTATTTTTTTTTTGTCTCCGTGTTTATGAAATTCTATTCCATGAAATGAGTGAATCCGGGTGGGTAGAGACGCTACGCAGGTTTAACCAAAGGAAGATCGCAGAAAAAGACGCAAAAGCTGTGGATGAAGATCAAAACTTCCCCGGTGAGACCGATCTTTTCAGCAAGTACTATAATGAGTGGAAAGGGACAGGCAAAGTCAACTCATCAAAGAACTGTAATGGCATACCAAGGTTTTATTTTAAGCTTCCCTCCGAAGATGAGGTTTTATTGCAAAAACTGCGAGAGGAGGCAAGAGCAGTGTTTCTTCAGAGAAAAAGTCGAGAACTTCTTGAT…	Serine/threonine-protein phosphatase 2A regulatory subunit B'' subunit gamma OS=Danio rerio GN=ppp2r3c PE=2 SV=1; Accession=P2R3C_DANRE; E-value=4.0e-95	A7RNX9_NEMVE	A7RNX9_NEMVE	NA	0.0553
SEQINDEX6703_C_c	CTTCGAGTGAAAGCCGTTACCTTTCCGTAGGAGACTTTTAGCAATCAGTTTCGAGCCGCCATTCAACTTTAATCATAAATCAAAATGCGCGAGTGTATCTCAGTTCACGTTGGCCAAGCTGGTGTCCAAATTGGAAACGCTTGTTGGGAATTGTACTGCTTGGAACATGGAATTCAGCCTGATGGCCAGATGCCAAGCGACAAGACCATCGGTGGAGGAGACGATTCCTTCAACACGTTTTTCAGCGAAACCGGAGCAGGAAAGCACGTCCCTCGAGCAGTGTTCGTTGACTTGGAACCGACCGTTGTTGATGAGGTCCGCACTGGTACCTACAGACAGCTTTTCCACCCAGAGCAATTGATGACTGGCAAAGAAGATGCTGCAAACAATTATGCCCGT…	Contig1647	GGGGTTACCTTTCCGTAGGAGACTTTTAGCAATCAGTTTCGAGCCGCCAGTCAACTTTAATCATAAATCAAAATGCGCGAGTGTATCTCAGTTCACGTTGGCCAAGCTGGTGTCCAAATTGGAAACGCTTGTTGGGAATTGTACTGCTTGGAACATGGAATTCAGCCTGATGGCCAGATGCCAAGCGACAAGACCATCGGTGGAGGAGACGATTCCTTTAACACGTTTTTCAGCGAAACCGGAGCAGGAAAGCACGTCCCTCGAGCAGTGTTCGTTGACTTGGAACCGACCGTTGTTGATGAGGTCCGCACTGGTACCTACAGACAGCTTTTCCACCCAGAGCAATTGATGACTGGCAAAGAAGATGCTGCAAACAATTATGCCCGTGGACATTACACT…	Tubulin alpha-1D chain OS=Bos taurus GN=TUBA1D PE=2 SV=1; Accession=TBA1D_BOVIN; E-value=0.0e+00	A7RUT1_NEMVE	A7RUT1_NEMVE	A7RUT1_NEMVE	0.0482
SEQINDEX16285_C_c	TCGGACCNCTTGTGAGGATNCGATAAAAATGGAAGAAGAATTGTGTTTTAGCCTTTCGTTGCTGAGTTTTTCTTCTCCAGTGACACATGTTTACAATCCCTTAGAGTATGCCAAAGAAACACACAACGATTATGTGAGGAAATACTGCAAACTTGGACAAAAGGTTATTTTCTTAGGCATGAACCCTGGACCTTTTGGAATGGCGCAAAATGGGATTCCATTTGGTGACACAAATCATGTCAAGGATTGGCTTCAAATCAAGGGAACTGTTTATGTTCCTGAGAAAGAGCATAGAAAGAGGCCTATCCAAGGCCTGAACTGTCAAAGAGTAGAAGTGAGTGGAAGCCGTTTTTGGGGATTTTTCAAGGAACACAGCAAATCTCCACAGACATTGTTCTG…	Contig1865	GGGGACACTTCTAACAAATATGGCTGCAGCGGCCGCGATGTTAGACCCAGTCATCATTCCTCTCAAAAAGAGGGAGACAGGTCCTCAGTCGGACCTTTGTGAGGATGTGATAAAATTGGAAGAAGAATTGTGTTTTAGCCTTTCGTTGCTGAGTTTTTCTTCTCCAGTGACACATGTTTACAACCCCTTAGAGTATGCCAAAGAAACACACAACGATTATGTGAGGAAATACTGCAAACTTGGACAAAAGGTTATTTTCTTAGGCATGAACCCTGGACCTTTTGGAATGGCGCAAAATGGGATTCCATTTGGTGACACAAATCATGTCAAGGATTGGCTTCAAATCAAGGGAACTGTTTATGTTCCTGAGAAAGAGCATAGAAAGAGGCCTATCCAAGG…	Single-strand selective monofunctional uracil DNA glycosylase OS=Xenopus laevis GN=smug1 PE=1 SV=1; Accession=SMUG1_XENLA; E-value=3.0e-59	A7RG31_NEMVE	A7RG31_NEMVE	NA	0.0413
SEQINDEX3758_C_c	GACAAAGGAGGTATCTTTTTCGAGCGCGAAAGAAAAAAAGGAATCATTTCCCTCCACCTTGGATATTTTCGGAAGATAAACTTGGTTGGGATTTCGACGTTGCAAAGTGATGGCTGTGAATGGACATGTTGGACACGATTTCGTAGGCATGTGTGATCCCTTAGAGACAAATGATCCAAAGTTATATGAAATCTTGAAAAAAGAAAAACGGCGACAAGTTTGTGGCCTCGAATTGATCGCCTCGGAGAACTTCACAAGTAAGGCTGTCATGGAAGCTCTGGGCTCGTGTATGACCAACAAATACTCAGAAGGGCAAGTTGGACAGCGTTACTATGGAGGGAATCAGTTTATCGACGAAATGGAAAGCTTGTGCAAGACGAGGGCTCTCGAAGCTTTTCG…	Contig1297	GGGGGACGTCTTGTTATTTGACTAAACTTTTGACGCGTTGTGCGACAAAGAAGGTATTTTTTTCAAGCCCGAAAGAAAAAAAGGAATCATTTCCCTCCACCTTGGATATTTTCGGAAGATAAACTTGGTTGGGATTTCGACGTAGCAAAGTGATGGCTGTAAATGGACATGTTGGACACGATTTCGTAGGCATGTGTGATCCCTTAGAGACAAATGATCCAAAGTTATATGAAATCTTGAAAAAAGAAAAACGGCGTCAAGTTTGTGGCCTCGAATTGATCGCCTCGGAGAACTTCACAAGTAAGGCTGTCATGGAAGCTCTGGGCTCGTGTATGACCAACAAATATTCAGAAGGGCAAGTTGGACAGCGTTACTATGGAGGGAATCAGTTTATCGACG…	Serine hydroxymethyltransferase, mitochondrial OS=Homo sapiens GN=SHMT2 PE=1 SV=3; Accession=GLYM_HUMAN; E-value=1.0e-157	A7SS63_NEMVE	A7SS63_NEMVE	A7SS63_NEMVE	0.0325
SEQINDEX17810_C_c	GCACACGGACAGAGAGTGAATTTTTTAGGCTTAATTTCCGTCCTTAAATATTGATAGCTTCTTTCCCGTTCGAACTGCTATTGCACGTTTTGATTTAGCTGTAGTGTTGGACTGGTAGTTCCATGGAAGGGGCCGATTCTTTTGTGATCAAAGAAGGATGGGCAACAAAGGAAAGCGGACAAGCAGTGTTAGGTCAAACAAACTGGAGAAAGCGGTGGTGTCGCCTTTCTCGAAGCTCCGATGGGACCTTTTGGGCTTATTACAGGAAGCTGGAAGATATTGCCTTGGGACAACCTGCTGGAAGAATAGAGCTTGACTCAACTTATGCTGCTCGTGAGCTTGAAGATGGAGAGAGGAAAAAGAAACCAAACTGTTTTGCCCTTGGCCCAATGTATGATA…	CCHX14485.b1_c_s	GGGGATTCAAAATGGATGGCACACGGATAGAGAGTGAATTTTTTAGGCTTAATTTCCGTCCTTAAATATTGATAGCTTCTTTCCTGTTCGAACTGCTATTGCACGTTTTGATTTAGCTGTAGTGTTGGACTGGTAGTTCCATGGAAGGGGCCGATTCTTTTGTGATCAAAGAAGGATGGGCAACAAAGGAAAGCGGACAAGCAGTGTTAGGTCAAACAAACTGGAGAAAGCGGTGGTGTCGCCTTTCTCGAAGCTCCGATGGGACCTTTTGGGCTTATTACAGGAAGCTGGAAGATATTGCCTTGGGACAACCTGCTGGAAGAATAGAGCTTGACTCAACTTATGCTGCTCGTGAGCTTGAAGATGGAGAGAGGAAAAAGAAACCAAACTGTTTTGCCC…	NA	A7SYD9_NEMVE	A7SYD9_NEMVE	NA	0.1439
SEQINDEX8815_C_c	AGTGGTTCCTCTATGTTTCACGCATTGCGCGAATTACATGCTTTTTATCCCCGGAGGCGACGTTCGTGACCATCACAGTTAGAAGCTAAGGTGGTTGTCACTATTGTTAAAAAGCTGGTCCTATTCGGCAGCAAAATCATGCAATCTTTGAAGATCAATAAGAATGCGTTGGCATACAGTGCTACAACTCTGGCTGCCACCATGATGAATTCCGTTTTCAATTTTTACTACGTTAAGACATTTCTCAACGTTTACAAGATTTCAAACTACTGGTTCAATGTGGCACAAATTGTGTTCCTAATTTGGAATGCTATCAATGATCCTTTATTTGGGTACTTTCAAGACAGTTCTACATGGATGGTTTTGAGAAAGAGAAGGTTGGCAATATTCTATGGAGCT…	CCHX5915.b1_c_s	GGGCGGAGGCGATATTCGTGACCATCACAGTTAGAAGCTAAGGTGGTTGTCACTATTGTTAAAAAGCTGGTCCTATTCGGCAGCAAAATCATGCAATCTTTGAAGATCAATAAGAATGCGTTGGCATACAGTGCTACAACTCTGGCTGCCACCATGATGAATTCCGTTTTCAATTTTTACTACGTTAAGACATTTCTCAACGTTTACAAGATTTCAAACTACTGGTTCAATGTGGCTCAAATTGTGTTCCTAATTTGGAATGCTATCAATGATCCTTTATTTGGTTACTTTCAAGACAGTTCTACATGGATGGTTTTGAGAAAGAGAAGGTTGGCAATATTCTATGGAGCTCCCTTGTTTGCAATCAGCTTTCTCTCCCCATGGTTTCCATGGACATGG…	Transmembrane protein 180 OS=Gallus gallus GN=TMEM180 PE=2 SV=1; Accession=TM180_CHICK; E-value=9.0e-57	A7S2D5_NEMVE	A7S2D5_NEMVE	A7S2D5_NEMVE	0.1163
SEQINDEX11194_C_c	AAAATGGGACCTGGCACAATGAAATTCACCATAAGTTAACCGATCTTGTGGGCTGCTTTGACAGGCGAGAGCAAGAATTAGCTCAGTTGAGCCAAAAGCTGGCAAGTGATCGGGAGGCATTTGAGCAAGAAATGAAAAGTAAACGACAGGAGCACGACAAGATTGTTGAAGAACAATAAAAGACCTTGAGGAGACCAGGCTCAAGGTAGAAAACGAGAAGAAACGAATGCACGAAGTTCAAGAATTTCAGTCTTCGCCAGTTCATCTGAATGTTGGGGGCCATCGCTTCACCACTTCTCTTCAAACTCTGAGGCGAGATCAAGAATCCATGCTAGCTACCATGTTTTCTGGTAGACATAAGCTATTAAAAGAACCTGATGGATGTTATTTTGTGGATAG…	Contig6272	GGGCATTTGAACAAGAAATGAAAAGTAAACGACAGGAGCACGACAAGATTGTTGAAGAACAATACAAAGACCTTGAGGAGACCAGGCTCAAGGTAGAAAACGAGAAGAAACGAATGCACGAAGTTCAAGAGTTTCAGTCTTCGCCAGTTCATCTGAATGTTGGGGGCCATCGCTTCACTACTTCTCTTCAAACTCTGAGGCGAGATCAGGAATCCATGCTAGCTACCATGTTTTCTGGTAGACATAAGCTATTAAAAGAACCTGATGGATGTTATTTTGTGGATAGGGATGGAACACATTTTCGTCATATTTTAAACTATCTTCGTGATGGCTTCCACGCGGAAATGTTTCCTCAGGATAAATTGTCCTTGAGGCAAATAATCAATGAAGCACAGTATT…	BTB/POZ domain-containing protein KCTD7 OS=Mus musculus GN=Kctd7 PE=2 SV=1; Accession=KCTD7_MOUSE; E-value=5.0e-18	A7RGK4_NEMVE	A7RGK4_NEMVE	NA	0.0991
SEQINDEX4718_C_c	GATGTTAATTTCCAGCTCTTTGGAGACAACGAGGTGTGGTTCGAGACAGTTGAATTTTGACCCTTTTCCTACAATTCAGGTTTGGAATCTAGTGCTTGCTGGGGTCAGTTGATCTTATGAAATGGATGCTCTCAAGAGGAAGGCTAAGGAAACTCTGGATGACATTAAGCGGGCAGAGAACAAATATAAAGATTTGACAAGGTACCTCAGGCTTGTCAAGGAGAGGGCAGAGTTGGCTGAAGAAGAAGCAGGTGTTCTGAAAGCCAAGATTGCAGCAAAGAGAGAGGAACTGGAATCGTTTGGTGGTGTGTTGAAAGAGAAACAAATTCAACATGCAGCAAAAGAAGAGGAAATGGACGAGAGCGAGAAAATGAGAAAGGCCCTTGAAGCCAAGGAGTT…	Contig2328	GGGAGTGTTCTGAAAGCCAAGATTGCAGCAAAGAGAGAAGAACTGGAATCGTTTGGTGGTGTGTTGAAAGAGAAACAAATTCAACATGCAGCAAAAGAAGAGGAAATGGACGAGAGCGAGAAAATGAGAAAGGCCCTTGAAGCCAAGGAGTTTGAAACTGATGATCAACTAGTAGGGCTGGAGTTGAAAGTTAGAAATGAAAAAAAGAAGGCAGATGAGCTAGAAGACAAACTTGCTGAAGCAAAAGTCTTGCACAATTCAATGAAGGGTGAGCTGAGTGAACTGTTAGCACGGTTGAATACTGCAGAGTCAAAGATTGTAAAATTGAGTGAAGAAGCCGACGGTAATTTGGTGAAGTTGATTAATTTGGAGCGAAGGCACGTGCTGTATGATCAACGC…	Tropomyosin beta chain OS=Rattus norvegicus GN=Tpm2 PE=2 SV=1; Accession=TPM2_RAT; E-value=2.0e-12	Q0ZDL9_NEMVE	Q0ZDL9_NEMVE	Q0ZDL9_NEMVE	0.096
SEQINDEX14999_C_c	CTGGGATATTGAATTATTTTGCGAAAAGAACATCACAAAGAAACATGGCTATGGGTTCTCCTGCGAGGGATGTCGAGGACGAGGAATACATGAGGAAGCTCGAGACAATAGGAGATATAAGGGTCAAGTCTTCTCAACTAGACAAGTTAAAATCACAGCTTATCCATGAATTGGATGTAGCAGAGAAGGAAAGTAAACTACTGACAGATTACAAAGCAGAAATGGAAGCTCTGCTTCACGAGAAAATGGCACATGTTGAAGAGTTGAGACTCATACATGCTGACATTAATTTAATGGAAAATACAATAAAGCAGTCTGAAGCAGAGCGAGAGAGAGGGCTGGAGACTCTTAGAAGGTTACATGAAGAATACAAACCACTAAAACGAGATATTGACAAGA…	Contig3396	GGGGGCCATATTGAATTATTTTGCGAAAAGGACATCACAGAGAAACATGGCTATGGGTTCTCCTGCGAGGGATGTCGAGGACGAGGAATACATGAGGAAGCTCGAGACAATAAGAGATATAAGGGTCAAGTCTTCTCAACTAGACAAGTTAAAATCACAGCTTATCCATGAATTGGATGTAGCAGAGAAGGAAAGTAAACTACTGACAGATTACAAAGCAGAAATGGAAGCTCTGCTTCACGAGAAAATGGCACATGTTGAAGAGTTGAGACTCATACATGCTGACATTAATTTAATGGAAAATACAATAAAGCAGTCTGAAGCAGAGCGAGAGAGAGGGCTGGAGACTCTTAGAAGGTTACATGAAGAATACAAACCACTAAAACGAGATATTGACAA…	Hepatocellular carcinoma-associated antigen 127 homolog OS=Mus musculus GN=Hca127 PE=2 SV=1; Accession=HC127_MOUSE; E-value=2.0e-47	A7SXF5_NEMVE	A7SXF5_NEMVE	NA	0.0828
SEQINDEX11131_C_c	AAGAGAGGGGAGGGTGGTAGACCAGAGGAGGTAGAGCTAATGTTACGAGAGCAGCTTCAGGATGAAAAGCTGGCAGTACAGAAAGCACTGTTGCTACACGAGAGTTTGTTTGGTCGGCCAAATACTAAGAAGGATAAGGATATCATGAGACCTTTGTATGACAGGTATCGCACAATCAAACGCAAGCTCGCTGCATCTGTCTCCGAACCAGCGATCAAAGTATCTAGTGGTGGTCGCCCTCGGACCAGTTCAATTGACAGATTGGTGTCAGATTTGGCGCCAATTCACGAAGATGCCCTATTACACTCGCCTAGTGAAGCAGCGAGCTCTCCAGCTCGATTCACACAGTCACTCCCCATCACATCTGGAAGAAGCTCTCCTAGAAGTCGCTTATCAGGT…	Contig2452	GTTGAACGTCTGAATGAGACAGTACCTCCAATGAACATTGGTCAAAGTATGAAAGGAAGCCGTAGTGAGCCGCTACTGACAATCACACCTTCCAGCATAGAGGATTCTCTGGAAAGGTTACTGCACCAGTTGGACGAGAAGAGAGGGGAGGGTGGTAGACCAGAGGAGGTAGAGCTAATGTTACGAGAGCAACTTCAGGATGAAAAGCTGGCAGTACAGAAAGCACTGTTGCTACACGAGAGTTTGTTTGGTCGGCCAAATACTAAGAAGGATAAGGATATCATGAGACCTTTGTATGACAGGTATCGCACAATCAAACGCAAGCTCGCTGCATCTGTCTCCGAACCAGCGATCAAAGTATCTAGTGGTGGTCGCCCTCGGACCAGTTCAATTGACAGA…	Protein FAM13A1 OS=Mus musculus GN=Fam13a1 PE=2 SV=1; Accession=FA13A_MOUSE; E-value=7.0e-15	A7RKY8_NEMVE	A7RKY8_NEMVE	NA	0.0815
SEQINDEX3314_C_c	GGTGAAACAGCGCAAGAATGACTCGGTACTCGAGAGATCCCGATAATACAACGAAATCTTGCAAGGCACGGGGCTCCAACCTCCGCGTGCACTTTAAGAACACCCGTGAAACAGCTTTCACGCTCAAGGGAATGCACATCAGGAAGGCCAACAGATATCTCAAAGATGTTATAGCAAAGAAGCAGATAGTGCCTTTCCGCAGATTCAACGGAGGAGTTGGGCGAAAAGCTCAGGCCAAGAACTTCAAAGTGCCTGGATCACAGGGACGTTGGCCAAAGAAAAGTGCTGAGTTTCTCCTTCAGCTTCTTAAGAATGCTGAAAGCAATGCAGAGTTCAAGGGATTGGATGTGGATTCGCTTGTGATTGAGCATATTCAGGTCAATGCAGCCCCCAAGATGA…	Contig750	GGGGCTTTTACGAAGGTGAGAAGCTCTTGTCTGTGTAATTCGTATCGGCGGTTATCTCGCCGATCCTTTCTAAGACTCTTTTCAGTACAATACTTATTTTAAGAGAATATAAATTTTCTATCTGTAATGCTTTACGAAGGTGAAACAGCGCAAGAATGACTCGGTACTCGAGAGATCCCGATAATACAACGAAATCTTGCAAGGCACGGGGCTCCAACCTTCGCGTGCACTTTAAGAACACCCGTGAAACAGCTTTCACGCTCAAAGGAATGCACATCAGGAAGGCCAACAGATATCTCAAAGATGTTATAGCAAAGAAGCAGATAGTGCCTTTCCGGAGATTCAACGGAGGAGTTGGGCGAAAAGCTCAGGCCAAGAACTTCAAAGTGTCTGGATCAC…	60S ribosomal protein L17 OS=Rattus norvegicus GN=Rpl17 PE=2 SV=3; Accession=RL17_RAT; E-value=2.0e-67	A7RSF0_NEMVE	A7RSF0_NEMVE	A7RSF0_NEMVE	0.0755
SEQINDEX2587_C_c	AACGGTCTCGAGAAGAGAGAAATGGACCACCAGGAATGGACACTGAGGGAGATATCGAGTCAAACTGGGATGAGGTTGTCGACAGTTTTGATAACATGAACTTGAAAGAATCGTTACTTCGAGGCATCTATGCTTACGGGTTTGAAAAACCATCAGCTATTCAACAGAGAGCAATCGTACCCTGTTGTAAAGGACTTGACGTGATTGCTCAAGCTCAGTCTGGTACTGGGAAAACTGCAACATTCTCAATTGCCATCCTTGAGAAGATTGATGTGTCTCTTCTAGAATGCCAAGCACTTGTCTTGGCCCCAACAAGAGAGTTGGCACAACAGATTCAAAAGGTAGTTATTGCTCTTGGTGATTACATGGAGGCGAAATGCCATGCTTGCATTGGTGGTA…	Contig3516	GGGGAATGCGAAATGTCTCACGATAGTGATTTGAGGAACCCTGACTCTGAACGGTCTCGAGAAGAGAGAAATGGACCACCAGGAATGGACACTGAGGGAGATATCGAGTCAAACTGGGATGGGGTTGTCGACAGTTTTGATAACATGAACTTGAAAGAATCGTTACTTCGAGGCATCTATGCTTACGGGTTTGAAAAACCATCAGCTATTCAACAGAGAGCAATCGTACCCTGTTGCAAAGGACTTGACGTGATTGCTCAAGCTCAGTCTGGTACTGGGAAAACTGCAACATTCTCAATTGCCATCCTTGAGAAGATTGATGTGTCCCTTCTAGAATGCCAAGCACTTGTCTTGGCCCCAACAAGAGAGTTGGCACAGCAGATTCAAAAGGTAGTTATT…	Eukaryotic initiation factor 4A-II OS=Rattus norvegicus GN=Eif4a2 PE=1 SV=1; Accession=IF4A2_RAT; E-value=0.0e+00	A6M930_PIG	A6M930_PIG	A6M930_PIG	0.0701
SEQINDEX9933_C_c	ATGCTTCCTTGACCGGCATCTTGTGTTTCCTTTGCTGGAATTCCTCTCTGTCAAGGAGATATATGATGAAAAGGAATTACTGAAAGGAAAGCTAGACCTCCTAAGCAACACGAACATGGTTGATTTTGCCATGGATGTTTTTAAAAATCTTTATCCCGACCAGGATGTCCCAGATGAACTTGTGAAAAAGAGATCTGAGGTTGTTACGCAGTTAAAATACCTCCAAGCTCAGACTGAACCTATTGTTAAGTGTTTTGAAGATCCAGAGTTTAATAATCAAATCCAAACAACAAGGGATGGGAGGACACTCTTTGAATATCTTGAAACAAATCATGGGATCAAGACAGAAATGCTTGACACACTTTACAAATACGCAAAGTTTCAGTACGAATGTGGAAA…	Contig1944	GGGGAACCACGTTTCCAAAATGGCGGAGCACGATCTCACAAGTCGAATGGGATGCTTCCTTGACCGGCATCTTGTGTTTCCTTTGCTGGAATTCCTCTCTGTCAAGGAGATATATGATGAAAAGGAATTACTGAAAGGAAAGCTAGACCTCCTAAGCAACACGAACATGGTTGATTTTGCCATGGATGTTTTTAAAAATCTTTATCCCGACCAGGATGTCCCAGATGAACTTGTGAAAAAGAGATCCGAGGTTGTTACGCAGTTAAAATACCTCCAAGCTCAGACTGAACCTATTGTTAAGTGTTTTGAAGATCCAGAGTTTAATAATCAAATCCAAACAACAAGGGATGGCCGGACACTCTTTGAATATCTTGAAACAAATCATGGGATCAAGACAGA…	Eukaryotic translation initiation factor 3 subunit E OS=Xenopus tropicalis GN=eif3e PE=2 SV=1; Accession=EIF3E_XENTR; E-value=0.0e+00	A7RWP6_NEMVE	A7RWP6_NEMVE	NA	0.0562
SEQINDEX3653_C_c	AAGAATGGTGGAGTGCTGCGCCTCCTTTCAAACACCTTAGCCTGGATCCCTCATGGCTCAGATAGTCCCAAGCTTTCCTGTGCATACTCCGAAATAAAAGTACAACGGATAAGTCCTGAGGGAAGTTCCAAAATACAAATTCAGCTTGTGCTCCATGATGGCAACTCATTCACTTTTCAGTTCACAAGTGAGCCTCAATCAAATGCAAAGAAGGAGAGAGATGATGCCAAGGATTTGCTCGCTCAGCTCATCCCAGCACACAGGAAAAAATCAAACAAAGAACTAGAGGAGAAGAACAGGATGCTCAAAGATAACCCCGAATTGTTTCAACTATATAAAGATTTGGTCGTCAGCAATGTTATCACTGCTGAAGAATTTTGGGCAAACCGGGGAAAGGCT…	Contig2730	GGGGGTACACTTCAAGCCATCCTAAGATGGCGGACCGGGAAACTGTTCTCCTTGAAGTGATAAATACAAAGCATAAAAAGAATGGTGGAGTGCTGCGCCTCCTTTCAAACACCTTAGCCTGGATCCCTCATGGCTCGGATAGTCCCAAGCTTTCCTGTGCATACTCCGAAATAAAAGTACAACGGATAAGTCCTGAGGGAAGTTCCAAAATACAAATTCAACTTGTGCTCCATGATGGCAACTCATTCACTTTTCAGTTCACAAGTGAGCCTCAATCAAATGCAAAGAAGGAGAGAGATGATGCCAAGGATTTGCTCGCTCAGCTCATCCCAGCACACAGGAAAAAATCAAACAAAGAACTAGAGGAGAAGAACAGGATGCTCAAAGATAACCCCGAAT…	General transcription factor IIH subunit 1 OS=Homo sapiens GN=GTF2H1 PE=1 SV=1; Accession=TF2H1_HUMAN; E-value=1.0e-85	A7RH50_NEMVE	A7RH50_NEMVE	A7RH50_NEMVE	0.0552
SEQINDEX10968_C_c	AAAACAACATGGCTTCTAAAGCACGGGATCTCAGCAAATTTGTAGAATTTGGACGAAAATTATCGGAGTAGGGAAAAACTACCGGCCGAATGGATCACCCCAACAGCCTCCTCCAGTCGAAGATCCACTGATTTTCCTGAAGCCTTCATCCACCTACTTGAGACCAGGGGGAAAAATAAAGATTCCAACTGGCCGTGATGAAATCATCCACGAGGTGGAGCTTGGTGTGGTTATTGGTAAAACTGGGATGAACATTTCAGAGTCAGAGGCTATGGATCACGTGGGAGGATACGCTCTGGCCTTGGACATGACTGACCTTGACCTAATTTTTGATAAAAGTGAACCTAAAACTGTGCCATATCCTTGGTTGTTGGGAAAGGGCTTCGATACTGCGACGCC…	Contig2015	GGGGAATTTTCAAAACAACATGGCTTCTAAAGGACGGGATCTCAGCAAATTTGTAGAATTTGGACGAAAAATTATCGGAGTAGGGAAAAACTACCGGCCGAATGGATCACCCCAACAGCCTCCTCCAGTCGAAGATCCACTGATTTTCCTGAAGCCTTCATCCACCTACTTGAGACCAGGGGGAAAAATAAAGATTCCAACTGGCCGTGATGAAATCATCCATGAGGTGGAGCTTGGTGTGGTTATTGGTAAAACTGGGATGAACATTTCACAGTCAGAGGCTATGGATCATGTGGGAGGATATGCTCTGGCCTTGGACATGACTGACCTTGACCTAATTTTTGATAAAAGTGAACCTAAAACTGTGCCATATCCTTGGTTGTTGGGAAAGGGCTTTGA…	Fumarylacetoacetate hydrolase domain-containing protein 1 homolog OS=Dictyostelium discoideum GN=fahd1 PE=3 SV=1; Accession=FAHD1_DICDI; E-value=7.0e-46	A7RIB8_NEMVE	A7RIB8_NEMVE	A7RIB8_NEMVE	0.0556
SEQINDEX15822_C_c	CCACTGTCCAATGAAATGTCTACAAGTTTTTGAAAAACTTGATCTTCGAGCAACAAAATGAATACTTTTCTTTCGCGTTTAAACACTGTGTTTGCCTTTACCCTCACAGTGCTAGCAGCTTTGACGTTTTTATGCTTTCTTTCAACGTTTTTTAACACAAACCAAGCTACTGTGTACCTCCAAACAAAGAAAGTTTTGGTAAAAAATGTGCAAGACTTTGGCGTTAGCAAGGATAAGAATGATTTGGGTTTCGTGACGTTCGATCTCCAAAGTGATTTAAAAGGCATTTTCAACTGGAATGTGAAGCAACTCTTTCTCTATTTAACAGCAGAATATTCAACCAAGCTTAACAAATTTAATCAAGTCGTGATCTGGGACAAGATCATTCTACGGAGAGAC…	Contig1476	GGGGGGACCCAGTGCCACTGTCCAATGAAATGTTTACAAGTTTTTGAAAAACTTGATCTTCGAGCAAAAAAATGAATACTTTTCTTTCGCGTTTAAACACCGTGTTTGCCTTTACCCTCACAGTGCTAGCAGCCTTGACGTTTTTATGCTTTCTTTCAACGTTTTTTAACACAAATCAAGCTACTGTGTACCTCCAAACAAAGAAAGTTTTGGTAAAAAATGTGCAAGACTTTGGCGTTAGCAAGGATAAGAATGATTTGGGTTTCGTGACGTTCGATCTCCAAAGTGATTTAAAAGGCATTTTCAACTGGAATGTGAAGCAACTCTTTCTCTATTTAACAGCAGAATATTCAACCAAGCTTAACAAATTTAATCAAGTCGTGATCTGGGACAAGATCA…	Signal peptidase complex subunit 3 OS=Drosophila melanogaster GN=Spase22-23 PE=2 SV=1; Accession=SPCS3_DROME; E-value=8.0e-54	A7RVL8_NEMVE	A7RVL8_NEMVE	NA	0.0536
SEQINDEX13650_C_c	ACTTGATACGAAGAGAACGTGGTGTCTCGATCAATAAAAAAGTTAATTAGCCAAAATGACGGGACGGCAGCCTGCCTGTGTCATTGACAATGGAACTGGCTACACCAAAATGGGTTTTGCTGGCAATACAGAACCCCAATACATTGTACCCACAGCCATTGGAATTAAAGAATCAGCAAAAGTTGGGGACCAAGCTCAAAGAAGATCTGCAAAGGGCATTGATGATTTAGATTTTTACATTGGTGATGAAGCTATGGAGAAAGCTGGCTATGCTACAAAGTGGCCAATTAGGCATGCTATTGTGGAAGACTGGGATCTAATGGAACGTTTTTGGGAACAGTGTATATTTAAGTACCTGCGAGCAGAACCAGAAGACCATTATTTCCTTCTAACTGAACC…	Contig3950	GGGGAGGTTTGGGAGTCTTCCGCCCGGATTGTTTCACATTTGAATTCCTCCTCATCGGTCAAACTGCGCGACTTGATACGAAGAGAACGTGGTGTCTTGATCATAAAAAAGTTAATTAGCCAAAATGACGGGACGTCAGCCTGCCTGTGTCATTGACAATGGAACTGGCTACACCAAAATGGGTTTCGCTGGCAATACAGAACCCCAATACATTGTACCCACAGCCATTGGAATTAAAGAATCAGCAAAAGTTGGGGACCAAGCTCAAAGAAGATCTGCAAAGGGCATTGATGATTTAGATTTTTACATTGGTGATGAAGCTATGGAGAAAGCTGGCTATGCTACAAAGTGGCCAATTAGGCATGCTATTGTGGAAGACTGGGATCTAATGGAACGTTT…	Actin-related protein 3 OS=Rattus norvegicus GN=Actr3 PE=1 SV=1; Accession=ARP3_RAT; E-value=0.0e+00	A7S3B3_NEMVE	A7S3B3_NEMVE	NA	0.0507
SEQINDEX3591_C_c	ATATTTTGACGAGAAAGGTTTGGTTCGTCAACAGTTGGATTCCTTTGACGAGTTTATTCAAATGTCTGTGCAGCGAATTGTGGAAGACTCCCCGGAAATTGACCTGCAAGCTGAGTCACTTCACATGACTTCAGATACAGAAACACCACCAAGATATCTCCTCAAATTTGAACAAATTTATCTTTCCAAGCCTACTCACTGGGAAAAGGATGGCGCTCCAAGCCCTATGATGCCAAATGAAGCTAGGCTTAGAAATCTTACTTATTCAGCTCCTCTTTATGTTGATATAACCAAAACAATGATCAAAGAAGACGATGATTCTGCTGTAACACAACACAGCAAAATGTTCATTGGCAAGATTCCAATCATGCTGCGTTCCACTTACTGCCTGTTAAATGG…	Contig1192	GGGTCTTACACGGGTTACAATCAGGAAGATTCAGTTATCATGAACGCTTCAGCTATTGACAGGGGTTTGTACAGATCGGTGTTTTACCGTTCGTACCGCGATCAAGAGTCGAAGCGAGGAATGGATCAAGAAGAAACATTTGAAAAACCCTCAAGGGATTCTTGCCAAGGCATGCGCAATGCAGTTTATGATAAACTGGATGATGGCGGACTCATCTCTCCTGGTACGCGCGTGAGCGGTGATGACGTCATCGTTGGAAAGACAGTAACTTTACCAGAGAATGATGACGAGTTGGAGGGAACAACCCGGCGCTTTACCAAGAAAGACTCAAGCACCTTCCTTCGCCCAAGTGAAACAGGCATAGTGGATCAGGTAATGGTTACAATCAATCAAGAAGGA…	DNA-directed RNA polymerase II subunit RPB2 OS=Homo sapiens GN=POLR2B PE=1 SV=1; Accession=RPB2_HUMAN; E-value=0.0e+00	A7SHD8_NEMVE	A7SHD8_NEMVE	NA	0.0494
SEQINDEX4832_C_c	ACGGGGCTCTCTACGCGAACACACATGGCACCGAAAGGAAGGTCAAAATCTGGCCCCAAAGGAAAACGGTCCTCAGGCAAAGGGAAGAGGGCCAAGGAAAGTGAAGAAGGTGAGGCTTCTGCCAAAGTGGATGAGGTTGCCACTAAAGGAAGCAATGTTGCTTCAGTGAAAGATAGTGAAACTGCTAAGGCTCATAAAGCAAAGAAGACTATTTTGAGAGGAGTAGAAAGAACAAAGAAGAGGAAGATCCGCAGAAGTGTCTACTTCCATCCCCCGAGGACTCTGAAGCTACCCAGAAACCCAAAGTACCCACGGCGTTCTGCACCCAGGAAGACCAAACTTGATCACTTTGCCGTCATCAAGCATCCGTTGACAACAGAGTCAGCAATGAAGAAAATT…	Contig2079	GGGGTTCTTTCCTCTCTACGTGAACACACATGGCACCAAAAGGAAGGTCAAAATCTGGGCCTAAGGGAAAACGGTCCTCAGGCAAAGGGAAGAGGGCCAAGGAAAGTGAAGAAGGTGAGGCTTCTGCCAAAGTGGATGAGGTTGCCACTAAAGGAAGCAATGTTGCTTCAGTGAAAGATAGTGAAACTGCTAAGGCTCATAAAGCAAAGAAGACTATTTTGAGAGGAGTAGAAAGAACAAAGAAGAGGAAGATCCGCACAAGTGTCTACTTCCATCCCCCGAGGACTCTGAAGCTCCCTAGAAATCCAAAGTACCCGCGGCGTTCTGCACCCAGGAAGACCAAACTTGATCACTTTGCCGTCATCAAGCATCCGTTGACAACGGAGTCAGCAATGAAGA…	60S ribosomal protein L23a OS=Rattus norvegicus GN=Rpl23a PE=2 SV=1; Accession=RL23A_RAT; E-value=3.0e-56	A7RM97_NEMVE	A7RM97_NEMVE	A7RM97_NEMVE	0.0344
SEQINDEX10939_C_c	CGGTTTCTGAAATCACGTTTCCATTTATTGTGATACATATTCTAATCTTGGCTTTGCGAAATAATTTACTCCAAAAAGATGTCCGTCACGTTACACACTGAACTTGGAGACTTAAAAATCGAACTCTTCTGCGAAGATACCCCAAAGGCTTCCGAGAACTTCTTAGCTCTTTGTGCAAGTAACTACTATGACAACTGTGTTTTCCACAGGAACATAAAGGGCTTTATGGTGCAGACTGGTGACCCTACAGGAAGTGGCAAAGGGGGGAAAAGCATTTGGGGCAAAAAGTTTGCTGATGAGCTTAGTCCATCATTGAGGCACAATGCAAGAGGAACAGTGTCTATGGCAAACAATGGGCAGGATACAAATGGATCTCAGTTTTTCATCTGTTATGCAAAA…	Contig758	GGGGGAAACCGAGGGTAAAACATGGCGGAGCGACGCTGTCGGTTTCTGAAATCACGTTTCCATTTATTGTGATTCATATTCTTGGCTTTGCGAAATAAATTACTCCAAAAAGATGTCCGTCACGTTGCACACTGAACTTGGAGACTTAAAAATCGAACTCTTCTGCGAAGATACCCCAAAGGCTTCCGAGAACTTCTTAGCTCTTTGTGCAAGTAACTACTATGACAACTGTGTTTTCCACAGGAACATAAAGGGCTTTATGGTGCAGACTGGTGACCCTACAGGAAGTGGCAAAGGGGGGAAAAGCATTTGGGGCAAAAAGTTTGCTGATGAGCTTAGTCCATCATTGAGGCACAATGCAAGAGGAACAGTGTCCATGGCAAACAATGGGCAGGATAC…	Peptidyl-prolyl cis-trans isomerase-like 3 OS=Mus musculus GN=Ppil3 PE=2 SV=1; Accession=PPIL3_MOUSE; E-value=4.0e-66	A7SBP4_NEMVE	A7SBP4_NEMVE	A7SBP4_NEMVE	0.0196
SEQINDEX10010_C_c	CGCTCCTGATTGGAAATATTATGAAACGGCTGAAACTGCGGCTCTTTTTGAGCCTGTGAAACAGTATTTGCTTAAGAACTGTAAAAAGTATGTGCAAATGGAACCTCCAACAAACAAGACGTTGGCCACACTTACTGCACAGTTGTTACAGTTTCAAGAAGATAACTTTGGTAAAGATGTCAGCAAGCAAGCTCTCCTAACAAAGCTACCAATGAAGATGTTCATGGATTACTCCTCTGGTGGAAGTCTTTGTGTTATTCTTGCAAATGTATTCAAGACAAAAATGGAACAAGGGTGGAGGAGATTTGACTTCCAGTCACCTTCACGTATGGATAGGAATGTGGAACTTTTCTTGAATATTGAAAAAGCTCTGAAGGAGGCAAAGTTATTGACTGTCCC…	CCHX15481.b1_c_s	GGGGAGCTATTGTTGTTATTTTTATTATTTATTTACCTCTTCTTCCATTAATTACCTTTTCCCTCCTTTTGGTGATTTAGCATTTTTTATTTGGGATGAACCGGAGCAAAATTTTAATGGTAGAATAATCATGTTGTATTTGCTAAATCCTGGGGACGCCACAATTTGTGTAAACACTGTAGTTGTCAAACAAGAGTCCATTGGAGGCAAGAATCAAAATGGCGGCTCGTAAGAAGGATGGCGCTCCTGATTGGAAATATTATGAAACGGCTGAAACTGCGGCTCTTTTTGAGCCTGTGAAACAGTATTTACTTAAAAACTGTAAAAAGTATGTGCAAATGGAACCTCCAACGAACAAGACGTTGGCCACACTTACTGCACAGTTGTTACAGTTTCAAG…	SWI/SNF complex subunit SMARCC2 OS=Mus musculus GN=Smarcc2 PE=1 SV=2; Accession=SMRC2_MOUSE; E-value=2.0e-78	A7RGR1_NEMVE	A7RGR1_NEMVE	NA	0.0159
SEQINDEX12220_C_c	ACACATCTTCATGTGACGGTATACTACTTACGTCATTCAACAGAATAAGAGTTCCGTTTCCCTGGTGACAGACAAAATGGCTGCACGAATTCTTAAAATGTTGGGGAAAAAATAACACCTGTGAAATGGGGGCCGCTGGAAGCTGTGGAGGTGGTGACCCTGAAGTTGGAAAGACGAGCATTTTTTTACGATACACAAAAAACCAGTTTGACTACAGTTACCAGCCAAGTGTTTCTGTGAGTATCGGAAATGTGGTCAAACATGTAAATATTCCTTATGAGACCATCGTGTCATTGGCTCTCTGGGATCTTCCTGGACGCGAGGAAATGGACTTAAGAAGAAGTTATTATAAAGATGTAGATGCCGCAATTGTTGTTGTTGACATGGATGATATTGACT…	CCHX10044.b1_c_s	GGGCAAGTACAGGATTACTGGATGCCATGAATAATTTCAAGAGGGCCTGCAGTAGAGCTGGTGTAACAGGCAGTGCAAAGGCTTCCCTTGAAGAATGCATTGATGGAATAAAGCAGCTTATACGAACAGCTGATGATGAGGATGGTCTTGAGGCACATGAAGATGGAGGGTACATAAAACTGATTGTCAAAGAGGAGTGCAAAGATAGCGTCCCTGGCCCTGTACAGAGGGTACTAAAATCATTCCACACTGAACTCGGAGCTGCTTCGAAGAAGGTCCTAACTCAGGCACCTGGAGCCCTGAATAAACTGCGAGAACATGAAGAGAAAATAAACGAGCTGAAAATCACAGCATTTGACCGTGCAGTGGCTAAAGGAATGAGCCAAAGACGAGCAAAAG…	Ras-related protein Rab-38 OS=Mus musculus GN=Rab38 PE=1 SV=1; Accession=RAB38_MOUSE; E-value=3.0e-10	A7RV03_NEMVE	A7RV03_NEMVE	NA	0.2515
SEQINDEX15456_C_c	CGATCAAATTAGATTGACACCGTCAATGACAAATAAAAAAGGTTATCTATGGACAAAAAGTGGCTTTCCTCATGACTGGTGGGAGGTAGAAGTTGCTATTAAAGTGACTGGTGTAGGACGACTTGGAGGAGATGGTGTGGCTATTTGGTATACAGAAACTGCTGGAATAGAGGGTCCAGCATTTGGAAATGTCAATACTTGGAAAGGTCTTGGTATTTTCTGTGATTCATTTGACAATGATCAACAAGGGAACAATCCTTTTATTTCTGTCATGCTTAATGATGGGACACACATTTATGATCATAACAAGGATGGACAAGATCTTCAGCGTGGTGGCTGCTTAAGAGATTTTCGTAATCGGCCTAATCCTGTCAAACTGAAAATTCGTTATTACGAAAA…	Contig2515	GGGGCAAGCCAATTTCAAGATGGCTTCCATTAATCGCTGTTGTAGTGTCACAATCTTATTGCTTTTAATTCCTATCGGTCTAGCCACAGAAGCGAGTGAACGTCATGTTAAATTCCAATATAAACATAGCTTTAAAGGTCCGCATCTTGCAAATAAAGAAGGCTCCGTTCCATTTTGGGCACATGGAGGAAGTGCTATTCCTAGTGACGATCAAATTAGATTGACACCGTCAATGACAAATAAAAAAGGTTATCTATGGACAAAAAGTGGCTTTCCTCATGACTGGTGGGAGGTAGAAGTTGCTATTAAAGTGACTGGTGTAGGACGACTTGGAGGAGATGGTGTGGCTATTTGGTATACAGAAACTGCTGGAATAGAGGGTCCAGCATTTGGAAATGT…	Protein ERGIC-53 OS=Cercopithecus aethiops GN=LMAN1 PE=2 SV=1; Accession=LMAN1_CERAE; E-value=2.0e-79	A7SS96_NEMVE	A7SS96_NEMVE	NA	0.1777
SEQINDEX14902_C_c	AATGGTGAAACAAACTTGAAGGTTCGCAATGCGTTATCTAATACGGCAACAATGCAAACAGCTCAACAGTTGTCGCATTTGACCGCTTACATTGAGTGTCAGCACCCACAGGAAGATCTTTACAGTTTTACAGGAAGAATGATTATAACTCCCCGAGGAGAAAGAGAATCAGTCATAAAATCCTTGGGACCACAGAACTTACTTTAAGAGGAGCGCGGTTAAAGAATTCCTCGTACAGTTTTGGTGTAGCTNNNNNNNNNNNNACAGAGGAAAGATTGGCGATGATATTGAAGTCAGAGTGGGTGATACAATCGAAAGATACGCCCGTCTCCATGTTTTGGACTTTGATTCTACTAGAAAAAGGATGAGTGTTATAGTAAAATCGCCAAGAGCTGAATA…	CCHX16619.b1_c_s	GGGAGCCTCGACTTTACAGAGACCTGGCCAAGAATTATCGATTGTCGTGGACTGAGTTCTTCTTTTGGATCGCTTCTGGTTATTGGCATGCTTTAGTTCTGTTCTTTGGATCGTTTTTCTTTTTTCAAAGTGGTTCATTGGGTTCGGCCATGTTGCAATATGGAAACTGGTCATTTGGGACTTTTGTTTTTACAGTGTGTATTGTAGTCAGCAATCTAAAGTTGGCGCTAGTAACACATTATTGGACATGGATGACTCATGTAGCCACTTGGGGATCAATCCTTCTCTTTTTTGTATCGACCATCGCATTCAACGCAGAAACCTGGAAAGGAGCACAGCTGGCTTTCGGCGAAACGATATCTCTTGATATGTACGGAGTGTTCTATCAACTCTTGTCCA…	Probable phospholipid-transporting ATPase IF (Fragment) OS=Oryctolagus cuniculus GN=ATP11B PE=2 SV=2; Accession=AT11B_RABIT; E-value=2.0e-18	A7SEC6_NEMVE	A7SEC6_NEMVE	A7SEC6_NEMVE	0.1555
SEQINDEX1789_C_c	CGATTACTCAGCAAATCGCCACCTTGCTTTTGGTTGTGGGGAGTACATGACAAAGCGGTTTTGAAATAGAGCTGAGACAAAATTCTCTGAAGACTCGAAGAAACTCTTTTAAGGACCGCGACAATGTCAATAATGGAATACAATGGTGCCGCCATCATTGCGATGGTCGGTAAAGAATGTGTAGCTATCGCTGCAGATCGGCGTTTGGGCATTCAAGCACAGACTTTATCATGCGACTTTCAGAAAATCTTCCAGATGGGAGACAAGCTGTTTCTGGGTTTGCCTGGTTTGGCTACGGACGTGCAAACCGTATCGAACAGGCTAACATTCCGCAAGAACTTATACGAACTGCGAGAGAATCGCCAAATTAAGCCGAAAACGTTCATGAGTATGGTGTCA…	Contig1960	GGGGATCTTGCTTTTGATTGTGGAGAGTACATGACAAAGCGGTTTTGAAATAGAGCTGAGACAAAATTCTCTGAAGACTCGAAGAAACTCTTTTGAGGATCGCGACAATGTCAATAATGGAATACAATGGTGCCGCCATCATTGCGATGGTCGGTAAAGAATGCGTAGCTATCGCTGCAGATCGGCGTTTGGGCATTCAAGCACAGACTTTATCATGCGACTTTCAGAAAATCTTCCAGATGGGAGACAAGCTGTTTCTGGGTTTGCCTGGTTTGGCTACGGACGTGCAAACCGTATCGAACAGGCTAACATTCCGCAAGAACTTATACGAACTGCGAGAGAATCGCCAAATTAAGCCGAAAACGTTCATGAGTATGGTGTCAAATTTGCTTTATGAAC…	Proteasome subunit beta type-3 OS=Oncorhynchus mykiss GN=psmb3 PE=2 SV=1; Accession=PSB3_ONCMY; E-value=7.0e-94	A7S085_NEMVE	A7S085_NEMVE	NA	0.1287
SEQINDEX2236_C_c	ATGACGGAGTACAAACTAGTGGTCGTTGGAGCTGGTGGTGTTGGGAAAAGTGCGTTGACTATACAACTAATACAAAATCACTTTGTTGATGAATATGATCCAACAATTGAGGATTCTTATAGAAAACAAGTTGTGATTGATGGAGAAACATGTTTACTGGATATACTGGACACAGCAGGCCAAGAGGAGTACAGTGCAATGAGAGATCAATACATGAGAACTGGCGAGGGCTTCCTGTGTGTTTTTGCTGTCAATAACAAGAGATCCTTTGAAGAAATACATGCATTCAGACAACAGATTAAACGAGTCAAAGATGCAGATGAAGTTCCTATGGTTTTGGTTGGGAACAAATGTGACCTTCAGAGGACAGTGATGCCAATGGAAGCTCATGATCTCGCC…	Contig472	GGGGGCGCTTCTGAGTCACCGAACGTTCAATCGAAGGTTGTACTTCCTCTAATCCGGACAGGTTGGGTTGTATTGGGGATAACTGAGTCTTTTTAATTTAAAACGTTAAAATTGTAGAGATGACGGAGTACAAACTAGTGGTCGTTGGAGCTGGTGGTGTTGGGAAAAGTGCGTTGACTATACAACTAATACAAAATCACTTCGTTGATGAATATGATCCAACAATTGAGGATTCTTATAGAAAACAAGTTGTGATTGATGGAGAAACATGTTTACTGGATATACTGGACACAGCAGGCCAAGAGGAGTACAGTGCAATGAGAGATCAATACATGAGAACTGGCGAGGGCTTCCTGTGTGTTTTTGCTGTCAATAACAAGAGATCCTTTGAAGAAATAC…	GTPase HRas OS=Rattus norvegicus GN=Hras1 PE=1 SV=1; Accession=RASH_RAT; E-value=3.0e-71	Q76LV5_MOUSE	Q76LV5_MOUSE	Q80YS0_MOUSE	0.1104
SEQINDEX4041_C_c	CCATTGCCAACTCGTAAATTGCTACCTGCGTGTTGAGATTTTACGAGTTCTGAGCACGGCGAGTTGAAATGGATAGCCTTCAGGTGGAAGTCAAGATCGAACTTGGTCACAAAGCTTCGTGTAAAGAAACGTTAACTCCAGAAGGATTCACTCACGATTGGGTCGTATTTGTGCGAGGACCCGAGAGCTGTGATATTTCCCATTTCGTGGACAAAGTGGTCTTCAATTTGCACGAAAGTTTTGCGAAGCCAAGACGAGTGTTAAAAGATCCTCCATATCAAGTAGCAGAAGCTGGTTATGGGAGCTTTTTCCTGCCAATCGAGGTCTACTTTAAGAACAAAGAAGAACCAAGGAAATTGAGATTTGACTATGACTTGTTTTTGCCTGTGTATGGATCTC…	Contig6165	GGGGAATGTATGCATTTCCATAAGACCAGAGATCTTTTTTTACGTTTCATGAATTTCTGAGTGCTTATTTTCCGCTGTAGCGGTCTTGTTGGCCAATTGGCCATTGCCAACTCGTAAATTGCTACCTGCGTGTTGAGATTTTACGAGTTCTGAGCACGGCGAGTTGAAATGGATAGCCTTCAGGTGGAAGTCAAGATCGAACTTGGTCACAAAGCTTCGTGTAAAGAAACGTTAACTCCAGAAGGATTCACTCACGATTGGGTCGTATTTGTGCGGGGACCCGAGAGTTGTGATATTTCCCATTTCGTGGACAAAGTGGTCTTCAATTTGCACGAAAGTTTTGCGAAGCCAAGACGAGTGTTAAAAGATCCTCCATATCAAGTAGCAGAAGCTGGTTAT…	Protein AF-9 OS=Homo sapiens GN=MLLT3 PE=1 SV=1; Accession=AF9_HUMAN; E-value=7.0e-54	Q8IVB0_HUMAN	Q8IVB0_HUMAN	NA	0.1033
SEQINDEX15675_C_c	TGGCGGATGGAGGTGATTTAACAATTGCTGCGGCTGCAGGCGATTGGAAGGCGGTGAAGGATCTTTTAGACCAGGGTGTCTGTGTGGATTCTTGTTCTCCAGAGGGCTTCAGACCCCTATGCATTGCAGCATTCTGGGCATATAATAACATCGTACAGCAGCTGCTGGACAGAGGGGCTGACATCAATGCTTGTAACCGTGGTACAAACTGGACTGCCCTGCATTGTGCAACTTTTCAAGGACATGGAAAAGTGATCATGACATTAATGGAACACAACCCAGATTTAACAATCAGAGATAACTTAGGAAGGACAGCAGTAGATTTTGCCTCTGCACTTGATGGGATTTGGCCATTTTTTGCAGTTTCTGGTTGTAAGAGGACACCCAAAGCTGAACTTA…	CCHX6290.b1_c_s	GGGGAGAAACAAGATGGCGGATGGAGGTGATTTAACAATTGCTGCGGCTGCAGGCGATTGGAAGGCGGTGAAGGATCTTTTAGACCAGGGTGTCTGTGTGGATTCTTGTTCTCCAGAGGGCTTCAGACCCCTATGTATTGCAGCATTCTGGGCATATAATAACATCGTACAGCAGCTGCTGGACAGAGGGGCTGACATCGATGCTTGTAACCGTGGTACAAACTGGACTGCCCTGCATTGCGCAACTTTTCAAGGACATGGAAAAGTGATCATGACATTAATGGAACACAACCCAGATTTAACAATCAGAGATAACTTAGGAAGGACAGCAGTAGATTTTGCCTCTGCACTTGATGGAATTTGGCCATTTTTTGCAGTTTCTGGTTGTAAGAGGACTCC…	Ankyrin repeat domain-containing protein 50 OS=Homo sapiens GN=ANKRD50 PE=1 SV=3; Accession=ANR50_HUMAN; E-value=3.0e-08	A7RWN3_NEMVE	A7RWN3_NEMVE	A7RWN3_NEMVE	0.0946
SEQINDEX8753_C_c	GAGTTGAGTCCTTTGTGCAAACGACAGAATAGCCATCTCCTTCATCTCTTTGTGCCTAATATTCTTCTAAACGCAAATCAAGAAGGCGATTGAAGAGTAATAATGTCGAAGGTCGTGACTGTGTTCGGTGCGACTGGTGGCCAAGGAGGGGGTGTAGTTTCACGTCTTCTCAAAGCAATAAATAATGATGAAGGCGATTACCATATCCGTGCAATAACAAGGAATCCGGATGGACCAAAGGGGATAGATCTCAAAAACAAGGGATGCGAGGTCGTCAAGTGCGATATGGACGACCAGGCCTCCGTTGAAGAAGCGATTAGTGGTTCTTATGCGGTGTTCCTAGTAACAAATTACTGGGAGCATTTCAGTGCAGAAAAGGAAATTGATCAAGGGAAACGA…	CCHX11079.b1_c_s	GGGGGCAGCATTTAGGTCGTTTGTGCAAACGACAGAATAGCCATCTCCTTCATCTCTTTGTGCCTAATATTCTTCTAAACGCAAATCAAGAAGGCGATTGAAGAGTAATAATGTCGAAGGTCGTGACTGTGTTCGGCGCGACTGGTGGCCAAGGAGGGGGTATAGTTTCACGTCTTCTCAAAGCAATAAATAATGATGAAGGCGATTATCATATCCGTGCAATAACAAGGAATCCGGATGGACCAAAGGGGATAGATCTCAAAAACAAGGGATGCGAGGTCGTCAAGTGCGATATGGACGACCAGGCCTCCGTTGAAGAAGCGATTAGTGGTTCTTATGCGGTGTTCCTAGTAACAAATTACTGGGAGCATTTCAGTGCAGAAAAGGAAATTGATCAAG…	NmrA-like family domain-containing protein 1 OS=Gallus gallus GN=NMRAL1 PE=2 SV=1; Accession=NMRL1_CHICK; E-value=4.0e-58	B0BMG7_XENTR	B0BMG7_XENTR	NA	0.0788
SEQINDEX4783_C_c	CTCTCTTTCAGTGGCAATCATGGCGGAACAGACGGAGAAAGCTTTTCAGAAGCAGCCATCAATTTTTCTAAACAAGAAGCGTCTTTTGGGTCAAAAAGTAAAGAAGAATGAGCTCCGATTTGTGAAAAATGTTGGACTGGGATTTAAAACTCCTAAAGAGGCATATGAGGGAACTTACATTGACAAGAAGTGTCCTTTCACTGGAACTGTTAACATCCGTGGACGTATTTTGACTGGCATTGTCAAAAGTATGAAAATGAACCGCACCATTGTGATCAGGCGAGATTACTTGCATCACGTCAAGAAGTACAACAGGTTTGAGAAGAGACACAAGAATCTCTCTGTTCACCTGTCGCCTTGCTTCAGGGACGTTAGTGTTGGCGATACTGTTACAGTGGG…	Contig435	GGGGCTCTCTTTCAGTGGCAATCATGGCGGAACAGACGGAGAAAGCTTTTCAGAAGCAGCCATCAATTTTTCTAAACAAGAAGCGTCTTTTGGGTCAAAAAGTGAAGAAGAATGAGCTCCGATTTGTGAAAAATGTTGGACTGGGATTTAAAACTCCTAAAGAGGCATATGAGGGAACTTACATTGACAAGAAGTGTCCTTTCACTGGAACTGTTAACATCCGTGGACGTATTTTGACTGGCATTGTCAAAAGTATGAAAATGAACCGCACCATTGTGATCAGGCGAGATTACTTGCATCACGTCAAGAAGTACAACAGGTTTGAGAAGAGACACAAGAATCTCTCTGTTCACCTGTCGCCTTGCTTCAGGGACGTTAGTGTTGGCGATACTGTTACAG…	40S ribosomal protein S11 OS=Rattus norvegicus GN=Rps11 PE=1 SV=3; Accession=RS11_RAT; E-value=6.0e-59	A7RL80_NEMVE	A7RL80_NEMVE	Q59NQ3_CANAL	0.0773
SEQINDEX15346_C_c	CTTATAATATTTTTGTAGCTGACACTTTCGCTTGAGCTTGACAAGGAACTCGTATAGTGAATGTAGTTTTTGCAGTGACAATATAGTAAGACTTGACGTGAATATGGAGGAAACGTGTAAAGAAAGACAAGAAAATGAGCTCCAAGCTATTCAAGCAATTTACATGGATGATTTTCAAGACCTGCGTGAGAAGCGTGAAGACCCACCAAAAGTTTGTTTGAATTTGACCCCACTCCAAAGTGTTGTAGGCAAAGAAGTTTATGCCAGAGTGGACTTGATTGTGCAGTACACCAAACACTATCCCAATAAGAGCCCAAAGCTGTCTTTGAGCAATGCAAAAGGGATCTCAAATGAGGATGTGAGTGAACTGCAGAAAGAGCTGCAACAAATGGCTGCTGA…	CCHX10956.b1_c_s	GGGGAGGTCACCTTGGTGGCTCTTTGACAGCAACGTGTCTTCGTATTGTCGCGTGTGTTAGAAGTTCTATCGTTTTTTTTCCCTCGCGTTAACGTCTTTTAGAGCAGAAAAAATGTAGTCTAAAGGGAAAAGCCGTTCTGAGCAACGAGAAAGTTCGAAGATTCACTCGCATGCAAATTCAAGCTTATAATATTTTTGTAGCTGACACTTTCGCTTGAGCTTGACAAGGAACTCCTATAGTGAATGTAGTTTTTGCAGTGACAATATAGTAAGACTTGACGTGAATATGGAGGAAACGTGTAAAGAAAGACAAGAAAATGAGCTCCAAGCTATTCAAGCAATTTACATGGATGGTTTTCAAGACCTGCGTGAGAAGCGTGAAGACCCACCAAAAGTTTG…	Eukaryotic translation initiation factor 2-alpha kinase 4 OS=Mus musculus GN=Eif2ak4 PE=1 SV=2; Accession=E2AK4_MOUSE; E-value=6.0e-25	A2AUL9_MOUSE	A2AUL9_MOUSE	NA	0.0727
SEQINDEX12852_C_c	TTTGAAAGGCCAGGAAGACACTATTTCTCGAGGTTCAATCGAAGTGTGTCGTCTCATGCATCCCGATGATGCTAATGTAGTAGGGAACGTTCATGGGGGGACTGTGTTAAAGCTTATTGAGGAAGGAGGATTTATAATTGCGACACGCCATTGTAACAAACACGTGGTGGGCGAAAATAAACAACCCGTGATAGCCGCCTTAGCTCGCGTTGAAAGGACCGATTTTTTACAACCGATGTATATTGGTGAAGTTGCTCAAGTCCATGTGGAGCTAGGTTACGCTTCAAGGAACTCTTTGGAAGTGAGTGCATTTGTTTGGGCCGAAAATCTCACCACAGGAAGTCGGAGACTGACGAATCGTGCTCATCTCTGGTATGTTCCGGTAACCGGAAGTGAGGA…	Contig3760	GGGGGGGACGAAAGAACAACGAAAACAAGATGGCAGCAAAGAGACAAGCGGAAAGTTTGGACGAAGATTTGAAAGGCCAGGAAGACACTATTTCTCGAGGTTCAATCGAAGTGTGTCGTCTTATGCACCCCGATGATGCTAATGTAGTAGGGAACGTTCATGGGGGGACTGTGTTAAAGCTTATTGAGGAAGGAGGATTTATAATTGCGACACGCCATTGTAACAAACACGTGGTCGGCGAAAATAAACAACCCGTGATAGCCGCCTTAGCTCGCGTTGAAAGGACAGATTTTTTACAACCGATGTATATTGGTGAAGTTGCTCAAGTCCATGTGGAGCTAGGTTACGCTTCAAAGAACTCTTTGGAAGTGAGTGCATTTGTCTGGGCCGAAAATCTCA…	Uncharacterized acyl-CoA thioester hydrolase ZMO0511 OS=Zymomonas mobilis GN=ZMO0511 PE=3 SV=1; Accession=Y511_ZYMMO; E-value=7.0e-13	A7SEP0_NEMVE	A7SEP0_NEMVE	NA	0.0666
SEQINDEX15387_C_c	CCCTTTGCAATAATCTCACCGTTTTGTCATTACCGGACAAGCAATCGATTACCTATGGAGTCGTTCATAAGGCGTTTGTTTGCATTACCAACGTTACGAAGGGAACCGTTGTTAACCAAAAGCAAGTTTCTTGTAAGGGGGAAGGAGCTCATAGCAGTTCAGCTGTGCTGCAGGCAAAATGGTGTGAGCTACCGGAGAGATCAGTTCTCGTTATCACCTCTGTAAAGGGTGCACAGATGTTTGAAACCGATGGATCCATAATGATATTTTGGCAAGCACTGGGAGAGTCAGAGGAGGGAGTCTATTCACACTTTGCCAGAGGAATTAGTGCTGTGGGAGATAAATACATTTGTGTTGGACATCTGAGGGGAAGATCATGGTCTTTGATATCCCTTCACG…	Contig3989	GGGGCTCCTCGAAAGTTTATCTTCGGTCAAATGCATCAAGGCAGAGTTTGAAAATCGACCCCTCGTAATGTTCACAAGGTGTCCATCCGTAGCTCTCAAAGCCAGTGCTTCCTCCCTTTGCAATAATCTCACCGTTTTGTCATTACCGGACAAGCAATCGATTACCTATGGAGTCGTTCATAAGGCGTTTGTTTGCATTACCAACGTTACGAAGGGAAGCGTTGTTAACCAAAAGCAAGTTTCTTGTAAGGGGGAAGGAGCTCATAGCAGTTCAGCTGTGCTGCAGGCAAAATGGTGTGAGCTACCGGAGAGATCAGTTCTCGTTATCACCTCTGTAAAGGGTGCACAGATGTTTGAAACTGATGGATCCATAATGATATTTTGGCAAGCACTGGGAGA…	WD repeat-containing protein 54 OS=Mus musculus GN=Wdr54 PE=2 SV=1; Accession=WDR54_MOUSE; E-value=3.0e-56	A7S438_NEMVE	A7S438_NEMVE	A7S438_NEMVE	0.0599
SEQINDEX7049_C_c	GCACGAGCTTCAGAGAGAAGATTCAATCATGAAGACCATATTGGCAAGCCAAACGGTCAACATACCCGAGAATGTCACCGTCAAGGCTGCAAGTCGTAAAGTGACAGTCGAAGGACCTCGTGGCACCCTTGTGCGGAATTTTAGACATCTGAATGTGGAATTGCTACTTGTTGGCAAGAATAAACTGCGTGTAAACGTGTGGTTTGCAAAACGCAAAGAGCTGGCCTGTGTGAAAACTCTCTGTACCCACATCGAAAATATGATCAAGGGGGTCGTCTATGGCTACAAGTACAAAATGAAGGCGGTATATGCTCATTTTCCCATCAACATCGCAATCTCTGAGAATGGCACATTGGTGGAAGTGCGCAACTTCTTGGGTGAGAAGTTCATTAGGCGTGT…	Contig2300	GGGGTACCTTTCCGATTATCTTCAGAGAGAAGATTCAATCATGAAGACAATATTGGCAAGCCAAACGGTCAACATACCCGAGAATGTCACCGTCAAGGCTGCAAGTCGTAAAGTGACAGTTGAAGGACCTCGTGGCACCCTTGTGCGGAATTTTAGACATTTGAATGTGGAATTGCTACTTGTTGGCAAGAATAAACTGCGTGTAAACGTGTGGTTTGCAAAACGCAAAGAGCTGGCCTGTGTGAAAACTCTCTGTACCCACATTGAGAATATGATCAAGGGGGTTGTCTATGGCTACAAGTACAAAATGAAGGCGGTATATGCTCATTTTCCCATCAACATTTCAATCTCTGAGAATGGCACATTGGTGGAAGTGCGCAACTTCTTGGGTGAGAAGTT…	60S ribosomal protein L9 OS=Bos taurus GN=RPL9 PE=2 SV=1; Accession=RL9_BOVIN; E-value=4.0e-60	A7S3C2_NEMVE	A7S3C2_NEMVE	NA	0.0535
SEQINDEX9690_C_c	CCTTATGGCACTCAATACTTTGCTGAGTATGCAGAGGAAATTCCAGGTGAATCAACAAACATGCTTTCAGAAGTGGCCAAAGAGATGCAGTGTTATGTTATTGGAGGATCAATACCAGAAAGGGATTCAGGAAAGCTGTACAATACTTCTACCTCATTCGGTCCTGATGGAGCCATGCTAGCTAAACACCGAAAGGTTCATCTTTTTGACATAGATGTTCCTGGAAAAATTCGCTTTCAAGAATCAGAAGTCCTTTCTCCTGGAAATCAACTAACAATGATAGAAATTGCTTTGTGTAAAATAGGGATTGGAATTTGCTATGACATGAGGTTCCCTGAAATGGCACAAGTTTATGCTCAGCAAGGTTGTAAGCTGTTATTTTATCCTGGAGCATTTAAC…	CCHX15183.b1_c_s	GGGGACGTTTCAAAATGGCAGCTTCGTCCTTTCGTATCGCGCTCATACAACTTGCAGTTTCTTCAAACAAAGCTCAGAACTTGCTACGTGCCAAGGATAAAATAAAAGAAGCAGTGTCGAAGGGCGCGAAAATTGTTGCACTACCTGAGTGTTTCAATTCACCATATGGTACTCAATACTTTGCTGAGTATGCAGAGGAAATTCCAGGTGAATCAACAAACATGCTTTCAGAAGTGGCCAAAGAGATGCAGTGTTATGTTATTGGAGGATCAATACCAGAAAGGGATTCAGGAAAGCTGTACAATACTTCTACCTCATTCGGTCCTGATGGAGCCATGCTAGCTAAACACCGAAAGGTTCATCTTTTTGACATAGATGTTCCCGGAAAAATTCGCTTTC…	Nitrilase homolog 2-A OS=Xenopus laevis GN=nit2a PE=2 SV=1; Accession=NIT2A_XENLA; E-value=8.0e-94	A7T002_NEMVE	A7T002_NEMVE	NA	0.0379
SEQINDEX9920_C_c	AAGAAGGCGAGAGTGACGCAGCTTATCAGAAAATCCAGTTACAGCTTGCTCAGTGTGAATTTGCGATACGAAAAACTCAGACTGTATTTGAGATGAACGAACATGAGACTGAAAACTACGAGAAAGTTTATGATGAGATTGAACAAAGTATCACACATGCCTATGAAGAAATTGCAAGTTGTAAGGCAGAGCTACAGCAAGCCAAACNAATACGCAGAAACAGACAAGAATATGATGCTCTTGCAAAAGTCATTGCCAAGCACCCAGAAAGACAAGAAACACTCAAGCAAATTGAAGAACTTGATAAAGAGCTCAATTCACTCACTGGAACGAAAGAGAGTCTTTTGTCAAAGCTAGAACTTCGGCAGAAGCAGTTTCACCTTCTTATCAACACGATTC…	Contig1111	GGGGATTCGAGTTACTTGCTTTTAAAATGGCGTCCGACGATGAGATTATAAGAAAGAGGTTGTTGATCGATGGTGAAGGTGCAGGCGACGATCGCAGGATCACGACACTTTTGAAGTCATTTCTGAAATGGTGTAATTCATCCAACCTTGAAGAAGGCGAGAGTGATGCAGCTTATCAGAAAATCCAGTTGCAGCTTGCTCAGTGTGAATTTGCGATACGAAAAACTCAGACAGTATTTGAGATGAACGAACATGAGACTGAAAACTACCAGAAAGTTTATGATGAGATTGAACAAAGTATCACACATGCCTATGAAGAAATTGCAAGTTGTAAGGCAGAGCTACAGCAAGCCAAAAGAATACGCAGAAACAGACAAGAATATGATGCTCTTGCTAAAG…	THO complex subunit 7 homolog OS=Xenopus tropicalis GN=thoc7 PE=2 SV=1; Accession=THOC7_XENTR; E-value=1.0e-42	A7RX34_NEMVE	A7RX34_NEMVE	NA	0.0367
SEQINDEX5039_C_c	CATAAGTAATCAAACACTGAAGGAAAGGGGGAGACGTGTTCTTGGAACTTTTGATGCTGGTAAAAGAAAGGCTCAAATACTACCCTCTTAAAAAAATCGTAATCATGATTGCTCCAACACTCTAGGAGNAGTCTGTGACTGAACTGAAAACGTCACAATTAATGCACAAAACAAACAATGCCTCTAAACCTGATAACAATACAAGCCACACACCAAAGTGACCCTTAAAAATAGAGGTCTGGAAGAGCTACTGGATTCCTCGACGACTCAAGCGATCGACATCGCAACTCGACAGCGAAGTGATCCGTGTAAGAAACAGTTATGCAAGCAGGAAAGAGCTACTTTAACGCCGAAGTACCAGACGTCGTTGTGAGAAGTCTATTTCACAAATATGACACA…	Contig2906	GGGGGACAGACCAAAGTGACCCTTAAAAATAGAGGTCTGGAAGAGCTACTGGATTCCTCGACGACTCAAGCGATCGACATCGCAACTCGACAGCGAAGTGATCCGTGTAAGAAACAGTTATGCAAGCAGGAAAGAGCTACTTTAACGCCGAAGTACCAGACGTCGTTGTGAGAAGTCTATTTCACAAATATGACACAGATGGAAGTGGGAACCTTGGCAAAAATGAAATGCTGAAATTATTGAAAGACGACTTAGGATTGAAAGACGAACAAGCTCGCGCTTGCATCATGTTAGTCGACAAAGACGGCTGCGGAGAAGTTTCTTTCAACGAGTTTATCACATGGCTTCGCACTGAAAATGGGTTCAGAAACATCGACGACAAGTCAAGATATTATAAAG…	Troponin C, skeletal muscle OS=Anguilla anguilla PE=1 SV=1; Accession=TNNC2_ANGAN; E-value=1.0e-11	A7RJ74_NEMVE	A7RJ74_NEMVE	A7RJ74_NEMVE	0.0298
SEQINDEX11914_C_c	AAGTATTTAAACCAGGAAGAGGCTCAGAAAGNAGACCAAGAACTGTTCAACGAGTATTCGTTTAGTGTTGACCAACTAATGGAATTGGCTGGACTGAGCGTTGCAGTAGCTTTGACTAAAGCGTATCCTAAAGGTACGAACAGCCCTTCTGTTCTGGTGTGTAGCGGTCCTGGTAACAATGGAGGTGATGGCTTAGTGGCAGCAAGACATCTGAAGCTGTTTGGTTACTGTCCAGAAATTTATTATCCCAAGAGAACGGACAAACAGTTGTTTAAAAATCTTGTGACACAGTGTGAAAAGATGAACATAACTTTCCTGGATGAGATGCCATCATCAGTGCATATTGACAGTACCTATGAATTCNTAGTGGATGCAATTTTTGGTTTCAGTTTTAAGGGC…	Contig2527	GGGGAGAATATCTCTGTAGTTCTTGGTGTTTTGGTCTGTATAGGCGGTTTCATGATTTTTCGAAACACCTCGCTCTGCGGTGGCTTACCTTACCTTCTTAAAAAGTTTTGTACTGCTAGACGAACAATGAAATATTTAAACCAGGAAGAGGCTCAGAAAATAGACCAAGAACTGTTCAACGAGTATTCGTTTAGTGTTGACCAATTGATGGAATTGGCCGGACTGAGCGTTGCAGTAGCTTTGACAAAAGCGTATCCTAAAGGCACAAACAGCCCTTCTGTTCTGGTGTGTAGCGGTCCTGGTAACAATGGAGGTGATGGCTTAGTGGCAGCAAGACATCTGAAGCTGTTTGGTTACTGTCCAGAAATTTATTATCCCAAGAGAACGGACAAACAGTTG…	Apolipoprotein A-I-binding protein OS=Mus musculus GN=Apoa1bp PE=1 SV=1; Accession=AIBP_MOUSE; E-value=2.0e-82	A7RPT4_NEMVE	A7RPT4_NEMVE	NA	0.0296
SEQINDEX10091_C_c	GCTTTTCCTTNGCGGACAAGATGGCGACTGAGGAGAAATCCCAAAAGCAAAATGTGATGAGGGAACTCCGTATTCAAAAACTATGTTTGAATATTTGCGTTGGTGAGAGTGGAGACAGGCTGACAAGAGCTGCTAAAGTGTTGGAACAGCTGACTGGACAACAACCAGTGTTTTCCAAAGCCCGTTACACTGTGCGTTCATTTGGCATTCGCCGTAATGAAAAGATTGCTGTTCACTGTACTGTGAGAGGTCCTAAAGCAGAGGAGATCCTTGAGAAGGGCTTGAAAGTCCGTGAATATGAGTTGTCAAGGGACAACTTTTCCAAGAATGGAAATTTTGGCTTTGGCATCCAGGAACACATTGATCTTGGAATTAAATATGACCCCAGCATTGGAATTT…	Contig2298	GGGGCTTTTCCTTAGCGGACAAGATGGCGACTGAGGAGAAATCCCGTAAGCAAAATGTGATGAGGGAACTCCGTATTCAAAAGCTATGTTTGAATATTTGTGTTGGTGAGAGTGGAGACAGGCTGACAAGAGCTGCTAAAGTGTTGGAACAGCTGACTGGACAACAACCAGTGTTTTCCAAAGCCCGTTACACTGTGCGTTCATTTGGCATTCGCCGTAATGAAAAGATTGCAGTTCACTGTACTGTGAGAGGTCCTAAAGCAGAGGAGATCCTTGAGAAGGGCTTGAAAGTCCGTGAATATGAATTGTCAAGGGACAACTTTTCCAAGAATGGAAATTTTGGCTTTGGCATCCAAGAACACATTGATCTTGGAATTAAATATGACCCCAGCATTGGAA…	60S ribosomal protein L11 OS=Rattus norvegicus GN=Rpl11 PE=1 SV=2; Accession=RL11_RAT; E-value=3.0e-82	Q6IQI6_DANRE	Q6IQI6_DANRE	Q6IQI6_DANRE	0.029
SEQINDEX15591_C_c	CGATTTCACTTTTTCATTAACTGAGCAGGGTTTTCATGGATTTTCGTAAATGGGAGAAAAAGCTGAACAAGCTGTGGACCTCTTAGCTGTGGCAGGTGGAGTACTGTGTGAATTTCTGGAAGTTGCATTTCACCTTATCCTGTATGTGAGAGAAGTTTATCCATCTGTAGTATTTGAAAGAAGGAAAAAATACAATGTTCCAGTGCAGATGTGCTGTCACCCAGATCTTAATCAGTATATCTTAGATGTCCTTCAGACAATAAAACCCTTACTGGAAAAGGGTGATGTTCAGAGAGTTTCTTTAGTGATTTCTGACAAAAAATTTCAACCCATTGAGAGATTTGTTTTTGAGATTGGAAACCTTGAAGAAACATCTAGAGTTCAAAGTGATGACAATTT…	CCHX12053.b1_c_s	GGGGGGGAATGGTCGTGTGAACAATATGGGCCGAGAGAAAGCGCCGAGGAGGGCGATCGATTTCATTTTTTCATTAACTGAGCAGGGTTTTCATGGATTTTCGTAAATGGGAGAAAAAGCTGAACAAGCTGTGGACCTCTTAGCTGTGGCAGGTGGAGTACTGTGTGAATTTCTGGAAGTTGCATTTCACCTTATCCTGTATGTGAGAGAAGTTTATCCATCTGTAGTATTTGAAAGAAGGAAAAAATACAATGTTCCAGTGCAGATGTGCTGTCACCCAGATCTTAATCAGTATATCTTAGATGTCCTTCAGACAATAAAACCCATACTGGAAAAGGGTGATGTTCAGAGAGTTTCTTTAGTGATTTCTGACAAAAAATTTCAACCCATTGAGAGATT…	Mitotic spindle assembly checkpoint protein MAD2B OS=Homo sapiens GN=MAD2L2 PE=1 SV=2; Accession=MD2L2_HUMAN; E-value=9.0e-51	A7SC91_NEMVE	A7SC91_NEMVE	NA	0.2729
SEQINDEX14315_C_c	GCACGAGCTCATTCAAAATGGCTGGCGGCGACAAACTCACCGAAGAGGAAGAGCTTTTGTTACAAACCTTCAGCAGAAATCTGTCAGCCAAATCTTACGCGCTACTTTACGCTAATGCATTCTTTGTATCGGCCATTCCGTTATGGTTGTTTTGGAGGGTCCATCAAATGGATATTTATTCCTCTGCAATTATGTTCGTTGTAATGACTTTGATCAGTACTTGGCTTGTTGCATTCTCCTACAAGAACGTCAAATTTCAACTGAAACATAGAATTGCTCAGCGTAGAAATGCCACAGTAGCCAGGGAACTGAATATGGAGACAAGTCCCAACAAGAAACTGACCCGGCAGGAGAAAGACGAGAGGATTTTGTGGAAAAAGAACAAAGTGGCTGAAACCG…	Contig719	GGGGGATTGCCAACTCATTCAAAATGGCTGGCGGCGACAAACTCACCGAAGAGGAAGAGCTTTTGTTACAAACCTTCAGCAGAAATCTGTCAGCCAAATCTTACGCGCTACTTTACGCTAATGCATTCTTTGTATCGGCCATTCCGTTATGGTTGTTTTGGAGGGTCCACCAAATGGATATTTATTCCTCTGCAATTATGTTCGTTGTAATGACTTTGATCAGTACTTGGCTTGTTGCATTCTCCTACAAGAACGTCAAATTTCAACTGAAACATAGAATTGCTCAGCGTAGAAATGCCACAGTAGCCAGGGAACTGAATATGGAGACAAGTCCCAACAAGAAACTGACCCGGCAGGAGAAAGACGAGAGGATTTTGTGGAAAAAGAACAAAGTGGCTG…	Translocon-associated protein subunit gamma OS=Rattus norvegicus GN=Ssr3 PE=1 SV=2; Accession=SSRG_RAT; E-value=8.0e-57	A7S9J2_NEMVE	A7S9J2_NEMVE	NA	0.1451
SEQINDEX5441_C_c	TATATTTCCTTTGGTTTGCTTCGATGAAACGTCGAAAGACAGGCAGGTTTGAATGACATCCTCTGAGGGTACATTTTAGCAGAATTGGAGTGAAGGTAGCTTGCTGTCACCATGAACAGTACTTATCAGAAAGTTTCTCAAGATCCTGAGGAAAGCGATGATCACAACCGTCCATACCAACCCTACCATGATGATGAAGAAGGTCTTGAGGGCAATTACGGTTACAACTATGGTTACAATCCTTATCGACCATCACCTGGGGGAATCAAGGGAAAGGTGGAACAAAAATACTGGCACACTAAACAGACCATGATACAAAAACTGGGAAAGGAGCAGGACTCCTATGTAGTTGCTGGAGACTCAGAAGTGGATGCTCGCCTTGAGGCTTTTAGACATATA…	CCHX5096.b1_c_s	GGGGATGGCGGCCATATTTGTTCTGTGTGTGGTATGAGAGAAGTGTACTGTAGGTTTTTTTATTCATGAATATATTTCCTTTGGTTTTGCTTCGATGAAACGTCGAAAGACAGGCAGGTTTGAATGACATCCTCTGAGGGTACATTTTAGCAGAATTGGAGTGAAGGTAGCTTGCTGTCACCATGAACAGTACTTATCAGAAAGTTTCTCAAGATCCTGAGGAAAGCGATGATCACAACCGTCCATACCAACCCTACCATGATGATGAAGAAGGTCTTGAGGGCAACTACGGTTACAACTATGGTTACAATCCTTATCGACCATCACCTGGAGGAATCAAGGGAAAGGTGGAACAAAAATACTGGCACACTAAACAGACCATGATACAAAAACTGGGAA…	Islet cell autoantigen 1 OS=Rattus norvegicus GN=Ica1 PE=2 SV=2; Accession=ICA69_RAT; E-value=3.0e-51	A7RHY1_NEMVE	A7RHY1_NEMVE	NA	0.0878
SEQINDEX22641_C_c	CCAAGTCTGAGTTCGCCAAATTTCGTCGGATTAAGAAGCTGTTTTATCGTAACATTTTGATGTTCATCAGAAAGCATGCCAGAAACTACTTTAGAAGCTAGAGATGTTATGGAAACAGTCGAAGACGGCGGACGAAGAAAGAAAGCTAGATTTCCCAGTCATTGGAGTTCAACGAGCACACCACACATGCGAACGCTCGAACTCGAAGGAGTTATTGAGGTTCTTCGAGAATACGATTCCGTGGATGGTAACGATATAAATTGTTCCATTTGTGGAAAGTTGTATAAAAGCAAAGTTTGTTTCACGAAGCATTTATGGGAGCACAGTGTTTATTGGGATTTGTTCGACGCTCTGAAAAATCAAGAAAGAGTGTTGTCCATACAAGCAGCAATCATACTT…	Contig4104	GGGGGACCTCGTGGAATAGCTACAAAAAATCTTTTTTCGCGTCCCACCCACCAAGTCTGAGTTCGCCAAATTTCGTCGATTAAGAAACTGTTTTATCGTAACATTTTGATGTTCATCAGAAAGCATGCCAGAAACTACTTTAGAAGCTAGAGATGTTATGGAAACAGTCGAAGACGGCGGACGAAGAAAGAAAGCTAGATTTCCCAGTCATTGGAGTTCAACGAGCACACCACACATGCGAACGCTCGAACTCGAAGGAGTTATTGAGGTTCTTCGAGAATACGATTCCGTGGATGGTAACGATATAAATTGTTCCATTTGTGGAAAGTTGTATAAAAGCAAAGTTTGTTTCACGAAGCATTTATGGGAGCACAGTGTTTATTGGGATTTGTTCGACGC…	NA	A7SZK4_NEMVE	A7SZK4_NEMVE	NA	0.0827
SEQINDEX6760_C_c	AATGTTTTCTAACCGTAAAGCCAAAACTTTTATCTGTGCCCTAAGAAAATGTCTCTGGTATTCGGTCAATTTACACAACTATCAAGAAAGAATCACCGCGAATTTTGATCACAGGAAGTTTAGGACAGCTTGGACGCGGACTTGCTAAAATTTTAAGAGATCGATATGGAAGGGACAACGTCATCATGTCAGACATCGCAAAAGCGTCATGGGACGTTTTACAAAGTGGGCCTTATTTGTATGNCTGACATCTTGGATTTCAAAAACCTTCAATCCATTGTTGTCAATGAGCGCATTGATTGGTTGGTCCATTTCAGTGCTATTTTAAGTGCAGTGGGAGAGCAGAATGTGTCACAAGCCTTACAAGTGAATGTTGAAGGTGTCCATAATATCCTTGAA…	CCHX6144.b1_c_s	GGGGAATACATATAGGAGTCATGTATGATGGGCTTAATATAGTGCTCCAACCAATTTAAGACAGTCAGGCAAAGATCGAAGACAGGGGAACTAGGAAGAGATTTGGTGCAACTGAAAAAGGGCCTTATTTGTATGCTGACATCTTGGATTTCAAAAACCTTCAATCCATTGTTGTCAATGAGCGCATTGATTGGTTGGTCCATTTCAGTGCTATTTTAAGTGCAGTGGGAGAGCAGAATGTGTCACAAGCCTTACAAGTGAATGTTGAAGGTGTCCATAATATCCTTGAACTCTGTCACAGGAATAATTTGCGACTGTTTTGCCCAAGTACCATTGGAGCGTTTGGTCCTGAGACACCATCAAATCCAACACCAGATCTCACAATTCAGAGGCCTAAAA…	L-threonine 3-dehydrogenase, mitochondrial OS=Bos taurus GN=TDH PE=2 SV=1; Accession=TDH_BOVIN; E-value=1.0e-110	A7S4Q0_NEMVE	A7S4Q0_NEMVE	NA	0.0694
SEQINDEX5516_C_c	CCTTGGATCGACGGAGTGCAGACCCAACGTTGATTTGCCCGCCTGTAGAACGCAGAGAGCCCATCAAAACAATGTCCACTCCCATCACAAGGACCAATTTTAAGCAGCAGCTTCAACGGCAACAGCTCCAGCAGCAAGAGTTGCAGTCGTACCAAACTCAGAAACAAGGCACAAATGAGGTGCTGCAGTCTCAAGGCATTGCTGTTCCCAGAACTTCATCTCCTACCACCGTTCCCCCGGACGTCCCATCAAGTGTTCTTCAGGTGAAGACACAACTTGAAAATCCCACCCGCTACTTCATTGCACAAAAACAGAAAAGGCAACTGAAGGAGTATCTTAAAACACAAGGATCCCCTACTGCAAGTGAGTTAGCAGCAGTGGTTAGCAGTACTAGTCAAC…	Contig3585	ATAAGTCTTGGCTCGGTTCCACCTGTTACCAATAACAACATGTTTGATATTTACAATGGTGCTCTTGGTATGGCACCCTTGCTCCATGCACCCCCACCTTCATCAAGCTGCCCTGCTGTCATAAAACAAGAACCACAAGAATTATTGATGGACCCGCAATTTGCCAAAGACAGACAGAAGAAAGATAACCATAATATGATTGAAAGACGAAGAAGATTTAACATTAACGACAGAATAAAGGAATTGGGAACACTCCTTCCACGCCAAGATTCAGACATGCGCCAAAACAAGGGAACAATATTAAAGGCATCGGTAGATTACATTAGAAAGTTGAAGCGAGAACAAGAGCGCATCAGGCAACTCGAGGAGGACAAAAGAAGCACAGAGGATCTTAATCGA…	Transcription factor E3 OS=Bos taurus GN=TFE3 PE=2 SV=1; Accession=TFE3_BOVIN; E-value=1.0e-51	A7RVM3_NEMVE	A7RVM3_NEMVE	A7RVM3_NEMVE	0.0458
SEQINDEX2550_C_c	CTCGCAGCCTTCTCCTCTCCCGAACCACGTTGTGAGAAACGAAGTTGTGAAGTATTCTTTATACCATGGCCGAACAGGACGAATTTGAAGGGAAGGCTGATTCTGGTGCGTCCAACTTCTTTCCTCAGCAGTGCTCTGCACTCCGCAAAAATGGTCATGTCCTGATCAAAGGCCGTCCTTGCAAGATTGTGGAAATGACCACCTCAAAGACTGGAAAGCATGGTCATGCGAAGGTTCACTTGGTGGGCATAGACATTTTTACACAGAAGAAGTATGAAGATATTTGTCCTTCTACTCATAACATGGATGTCCCTCGTGTTAATCGCAAGGACTATCAGCTGACAAACATTGACGATGGGTATTTATGCCTTATGGATGATGGCGGAGATATGCGTGAAG…	Contig3878	GGGGTCTCCCGAACCACGTTGTGAAAAACGAAGTTGTGAAGTATTCTTTATACCATGGCCGAACAGGAAGAATTTGAAGGGAAGGCTGATTCTGGTGCGTCAAACTTCTTTCCTCAGCAGTGCTCTGCACTCCGCAAAAATGGCCATGTCCTGATCAAAGGCCGTCCTTGCAAGATTGTGGAAATGACCACCTCAAAGACTGGAAAGCATGGTCATGCGAAGGTTCACTTGGTAGGCATAGACATTTTTACACAGAAGAAGTATGAAGATATTTGTCCTTCTACTCATAACATGGATGTCCCTCGTGTTAATCGCAAGGACTATCAGCTGACAAACATCGACGATGGGTACTTATGCCTTATGGATGATGGCGGAGACATGCGTGAAGACTTGAAAATT…	Eukaryotic translation initiation factor 5A-1 OS=Oryctolagus cuniculus GN=EIF5A PE=1 SV=2; Accession=IF5A1_RABIT; E-value=2.0e-57	Q7PSR5_ANOGA	Q7PSR5_ANOGA	NA	0.0312
SEQINDEX14856_C_c	AGCTGAAGTTATCGCAAGGAAAGTTGTCGATTTTTCTGTCGGACATCTAAAATGAGTTCGAGATTGGTCAAACAAGTGTTCGAAAAATATCAAAAGGAGAGAAGTGCTTTCGTGCAAAAGGTCGCTGATCTCGCAAGCCACTCAGAAAACATCGAAACCTTGCAGAATGTTGGTGCCATGGCTCTGTTGAGACCATTACTGCTTGATGTAGCTCCTGATATTCAGCAAACAGCTGCCTTGGCTCTTGGCCGACTAGCCAACTACAATGAAGACCTGGCAGAGGCAGTTGTCAAGGGAGACATCCTTCCTCAGCTTGTATACTCACTGGCTGAGCAAAATCGCTTTTATAAGAAAGCTGCTGCATTTGTTCTTCGAGCAGTCGCGAAACACTCACCCCAG…	CCHX3668.b1_c_s	GGGGCTAAGTCAGATTGCTAAGCACTCAGTGGACTTGGCAGAAATGGTTGTGGAAGCTGAAATTTTCCCTTCTGTTTTGACATGTCTCAAAGATTCTGATTAATATGTAAAGAAGAATGTAGCAACACTGATTAGGGAAATTGCCAAACATACACCAGAGCTTGCACAGTTGATTACCAATGCTGGAGGTGTGGCAGCTGTTGTTGATTTTATTAAAGAATCTAAAGGAAATGTTCGCCTTCCCGGAATCATGATGCTTGGATATGTTGCTGCTCACTCAGAAACACTTGCTTGGTCTGTGATTGTCTCCAAGGGAGCAATCGAATTAGCTGCAATCCTAACAGAAAATGAAGAGGACCACATTAAGGCTGCTCTCGCGTGGGCCTTGGGTCAGATAGG…	Sperm-associated antigen 6 OS=Mus musculus GN=Spag6 PE=1 SV=1; Accession=SPAG6_MOUSE; E-value=0.0e+00	A7S260_NEMVE	A7S260_NEMVE	Q8T892_CIOIN	0.1389
SEQINDEX6858_C_c	CTAAACAGCTCATCTAGCGAACGTCTGTTTGATACTATGGGACTGGAAATCGAACAACTTTTATCGGAGTTAACAGAAGTGAATGACTCAATGGCTGAGTACACATCAGGTCTCAGCCTTGGCCAGCCGAATGCGACTCAACTCCACACTCTTCAGAGACACAGGGACATACTGCAGGGATATTCGCATGAATTTTCAAAAACAAAGGCAAATATACAAGCCTACAGAGATAGAGAAGATTTACTTGGATCTGTGCATAGAGATATCCATGCATACAAGACTGGAATGAACAGGCGTACAGATCTTTACCTCAAAGAAAATGAGCACATAAGAAATTCGGACCGTTTAGCAGATGATGTTATTGGGGCTGCTTTAGCCACGAAGGAGAATCTTCAGAGC…	Contig2717	GGGGAGGGTGCGACTATGAGCGACGAAGCAGAAAATATGGCTTCCTCGGTTTCCCCTATGAGATGGGAAGAATTGAGGAAGAAGGCGAGACAACTAGAGAACGAAATTGACCTAAAATTGGTATCATTTAGCAAGTTAGGGACGAATTATAGTCACCACAATGGCTTCAAAGAAAGCTCCGACACATCACCACTACTAAACAGCTCATCTAGCGAACGTCTGTTTGATACTATGGGACTGGAAATCGAACAACTTTTATCGGAGTTAACAGAAGTGAATGACTCAATGGCTGAGTACACATCAGGTCTCAGCCTTGGCCAGCCGAATGCGACTCAACTCCACACTCTTCAGAGACACAGGGACATACTGCAGGGATATTCGCATGAATTTTCAAAAACA…	Golgi SNAP receptor complex member 1 OS=Bos taurus GN=GOSR1 PE=2 SV=1; Accession=GOSR1_BOVIN; E-value=2.0e-56	A7SWH3_NEMVE	A7SWH3_NEMVE	NA	0.1208
SEQINDEX13953_C_c	TTTAGTATTTTTTAGTCTAACTNCTTAGTTTCGCAACGATCGCATCAAACTCATGGCTGGTGGCAAGGCTAGATTGATATTCCGCAGTTGTTTGACTTGGAGTCTTATACGTATACTTATTTATTGGGATGTCCCAAAACCAGAGCTGCTGTGATTATCGACCCTGTGGATACACAGGCTGAGAGGGATGCAAAACTAACAAAAGAGTTGGACCTTAATCTCATTTATGCAATGAACACACATGTGCATGCTGACCATGTGACTGGTACTGGAATTCTGAAGAATCTCACCAACTGCAAAAGCGTAATTGCTAAAATAAGTGGAGCTAAAGCTGATGTTTTGATCAAGGATGGAGATAAAATTGACTTTGGAGATCAGGCTCTTGAGGTACGCTCAACC…	Contig1067	CGGGGGAGAGATGTTATGGTGATGAAATGAGCATGTGGATTGACTCAAGTTTTAGTATTTTTTTTGTCTAATACTTAGTTTCGCAACGATCGCATCAAACTCATGGCCGGTGGCAAGGCTAGATTGATATTCCGTCAGTTGTTTGACTTGGAGTCTTATACGTATACTTATTTATTGGGATGTCCCAAAACCAGAGCTGCTGTGATTATCGACCCTGTGGATACACAGGCCGAGAGGGATGCAAAACTAACAAAAGAGTTGGACCTTAATCTCATTTATGCAATGAACACACATGTGCATGCTGACCATGTGACTGGTACTGGAATTTTGAAGAATCTCACCAACTGCAAAAGCGTAATTGCTAAAATAAGTGGAGCTAAAGCTGATGTTTTGATCAAG…	Putative hydroxyacylglutathione hydrolase 3, mitochondrial OS=Arabidopsis thaliana GN=GLY3 PE=1 SV=2; Accession=GLO2O_ARATH; E-value=3.0e-71	A7S2J6_NEMVE	A7S2J6_NEMVE	A7S2J6_NEMVE	0.1134
SEQINDEX5777_C_c	CTGCAGCCTAAAGGCTTGCAAGCTGGACATCTGCCATCACTGTGTCGTGCTCTTGCTGGCATTCGCCTTTCGTCAACAGCTGCAACCTCAACACCAGCAAAAACGTCGTTTGGAAATATGAAGGATGAAGATCGCATCTTTACAAACTTATATGGAAGACATGATTGGAAGCTAACTGGAGCTATGCAAAGGGGTGACTGGTATAAAACCAAGGAGATCATATTGAAGGGAAAAGATTGGATCATCAAGGAAATCACAAAGTCTGGACTCAGAGGAAGAGGTGGAGCAGGTTTCCCAACTGGCATGAAATGGGGATTTATGAACAAGCCATCTGATGGAAGGCCAAAGTATCTTGTGGTTAATGCTGATGAAGGGGAACCAGGAACATGTAAAGACAGA…	Contig714	GGGGAATCATTCGCCATTTTGTTTGTTATGTAAGCCGGCCTCTGGAAGTTGTGTATTTGGAAGCTGCGTATTTGATCAACTTACGCAAATCATGGCAAAGTCTTTGGCCAAACTGCAACCTAAAGGCTTGCAAGCTGGACATCTGCCATCACTGTGTCGTGCTCTTGCTGGCATTCGCCTTTCGTCAACAGCTGCAACCTCAACACCACCAGCAAAAACGTCGTTTGGAAATATGAAGGATGAAGACCGCATCTTTACAAACTTATATGGAAGACATGATTGGAAGCTAGCTGGAGCTATGCAAAGGGGCGACTGGTATAAAACCAAGGAGATCATATTAAAGGGAAAAGATTGGATCATCAAGGAAATCACAAAGTCTGGACTTAGAGGAAGAGGTGG…	NADH dehydrogenase [ubiquinone] flavoprotein 1, mitochondrial OS=Pan troglodytes GN=NDUFV1 PE=2 SV=1; Accession=NDUV1_PANTR; E-value=0.0e+00	A7RST7_NEMVE	A7RST7_NEMVE	A7RST7_NEMVE	0.087
SEQINDEX8762_C_c	GACTTCCAACAGAAAAAGCAACATGGCGGGCACTGGTGACGTGGATGAACTTTTCGAAATAAGGAATTCCTTCTTTATTGGCAATTACCAGTTCTGCATAAACGAAGCCCAGAAGTTGCACCCGTCTTCTANGGAACTGTCCATCGAAAAGGATGTTTATATGTACAGAGCATACACTGCACAGGGTAAACACAGAGTTGTTCTTGATGAGGTGTCATCATCTTCACCCTCAGAGGTCCAACCAGTGAGGATGTTGGCCGACTATCACCAGAATCCAAGCAAAAGGGATGCAATTTTGAAGTCAATTGAAAAGAAATTGAATTCCAGTGATCTCAATGACTATGACCTGCTAGTAGCAGCTTCCATCTATTTCAATGAACAAAATTTCGAGTCTGCATT…	Contig1386	GGGGGACTTCCAACAAGAAAAGCAACATGGCGGGCACTGGTGACGTGGATGAACTTTTCGAAATAAGGAATTCCTTCTTTATTGGCAATTACCAGTTCTGCATAAACGAAGCTCAGAAGTTGCACCCGTCTTCTAGGGAACTATCCATCGAAAAGGATGTTTATATGTACAGAGCATACACTGCACAGGGTAAACACAGAGTTGTTCTTGATGAGGTGTCATCATCTTCACCCTCAGAGGTCCAACCAGTGAGGATGTTGGCCGACTATCACCAGAATCCAAGCAAAAGGGATGCTATTTTGAAGTCAATTGAAAAGAAATTGAATTCCAGTGATCTCAATGACTATGACCTGCTGGTAGCAGCTTCCATCTATTTCAATGAACAAAATTTCGAGTCTG…	Coatomer subunit epsilon OS=Gallus gallus GN=COPE PE=2 SV=1; Accession=COPE_CHICK; E-value=1.0e-44	A7SPR7_NEMVE	A7SPR7_NEMVE	A7SPR7_NEMVE	0.0729
SEQINDEX9439_C_c	TATTGAAACTGATCGATTGATTCCTTTCGTTGTGTTCCAGTGTTCTAAATCGGTGAAATGAAGGCCCTTATTCTTGTAGGAGGTTACGGAACGAGGCTTCGTCCTTTAACTTTGTCAAAACCGAAGCCACTGGTGGAATTCTGTAACAAGCCTATGGTTATGCATCAAATTGAAGCATTGGTCGAGCAGGCTGGAGTAAAGCATATAATTCTGGCAGTTAGTTATCGTGCAGAGATGTTGGAAAATGAAATGAAAGAACAACAGAAAAGGTTAGGAATCACGATTACCATATCTCACGAGAAGGAACCTTTAGGCACTGCTGGTCCCTTGGCACTGGCCAGAGACCATCTAACCGTTGATGAGGAGCCATTCTTCGTCCTAAACAGTGATGTTGTGTGT…	Contig3476	GGGGAAAAAAGGAAGATAGTTCGACTTCATTCGACACGTTGCATGAGATTCAGGAGTGACAGTGTTTCTATTGAAACTTATCGATTGATTCCTTTCGTTGTGTTCCAGTGTTCTAAATCGGTGAAATGAAGGCCCTTATTCTTGTAGGAGGTTACGGAACGAGGCTTCGTCCCTTAACTTTGTCAAAACCGAAGCCACTGGTGGAATTCTGTAACAAGCCTATGGTTATGCATCAAATTGAAGCATTGGTCGAGCAGGCTGGAGTAAAGCATATAATTCTGGCAGTTAGTTATCGTGCAGAGATGTTGGAAAATGAAATGAAAGAACAACAGAAAAGGTTAGGAATCACGATTACCATATCTCACGAGAAGGAACCTTTAGGCACTGCTGGTCCCTTGG…	Mannose-1-phosphate guanyltransferase beta OS=Danio rerio GN=gmppb PE=2 SV=1; Accession=GMPPB_DANRE; E-value=1.0e-152	A7RT58_NEMVE	A7RT58_NEMVE	NA	0.0716
SEQINDEX11962_C_c	GGGAAATGAAAACCGAGAGAGGGGTCAGTATTGACAATCCAAATGAGTCGTGGCTGGAAAGCAAGGGAACATGGTTTACATATGTTCTCCTCATCACACTCGGCCATCTAGTAATCCTTAGCGTTCCTTTTTTAAAAACGTCCACAGCCTGGACATTAACGAACATGTTCCATAACATGAGCATGTTTATTTTCTTGCATTACCTAAAAGGGACTCCATTTCAGACAGGTGATCAGGGGAAATCACGTCGTCTCACTCACTGGGAACAGCTAAACAATGGGGAACAGTTCACAGGAACAAGAAAATTCTTCACACTTGTACCAATATTCTTATTCATGTTGACAAGCTTTTACACAAACTATGATGGAATTCACTTTGTTTTCAATGNATTATCACTTC…	Contig3334	GGGGAGAACTGAGAGAGAAAGACAAATGAAGAGTCGACTTCAAGGGAAATGAAAACTGAGAGAGGGGTCAGTATTGACAATCCAAATGAGTCGTGGCTGGAAAGCAAGGGAACATGGTTTACATATGTTCTGCTCATCACACTCGGCCATCTAGTAATCCTTAGCGTTCCTTTTTTAAAAACGTCCACAGCTTGGACATTAACCAACATGTTCCATAACATGAGCATGTTTATTTTCTTGCATTACCTAAAAGGGACTCCATTTCAGACAGCTGATCAGGGGAAATCACGTCGTCTCACTCACTGGGAACAGCTAAACAATGGGGAACAGTTCACAGGAACAAGAAAATTCTTCACACTTGTACCAATATTCTTATTCATGTTGACAAGCTTTTACACA…	ORM1-like protein 3 OS=Homo sapiens GN=ORMDL3 PE=2 SV=1; Accession=ORML3_HUMAN; E-value=2.0e-47	A7RY87_NEMVE	A7RY87_NEMVE	NA	0.0587
SEQINDEX7514_C_c	CTGGTAATGGGACCCGCTGGAAGTGGAAAGTCAACTTACTGCAGTACAATACTGCAACACTGTGAAAATGTACAACGTTCTGTTCAAGTGGTGAATCTTGATCCAGCTGCAGAGCAGTTTGGTTATCCAGTTTTAGCTGATGTTAGGGAGTTGGTTGAGCTGGATGATGTTATGGAAGCTGCAGATTTACAGCTTGGACCCAATGGAGGACTTGTTTTCTGCATGGAATATTTGGTGCAGAATTTTGATTGGTTGGAAGAAAAATTGGGAGATGTTGAAGATGACTACATCCTGTTTGATTGCCCAGGCCAGATTGAGCTGTACACCCACATGCCTGTTATGCGGCAACTAGTGGAAACATTGCATCAATGGAATTTCCGAGTTTGCGGTGTTTTCCTT…	CCHX12001.b1_c_s	GGGGAAGCAGGGAAAAGATATTTCAAGATGGCGGATCGTCAGCATTCGAATAGAATTGGAAGGGATAAGGTTTGAATATTTAACGGAGATTTGTCCGAGATCATAAAGATGAGGTATGCACAGCTGGTAATGGGACCCGCTGGAAGTGGAAAGTCAACTTACTGCAGTACAATACTGCAACACTGTGAAAATGTACAACGTTCTGTTCAAGTGGTGAATCTTGATCCAGCTGCAGAGCAGTTTGGTTATCCAGTTTTAGCTGATGTCAGGGAGTTGGTTGAGCTGGATGATGTTATGGAAGCTGCAGATTTACAGCTTGGACCCAACGGAGGACTTGTTTTCTGCATGGAATATTTGGTGCAGAATTTTGATTGGTTGGAAGAAAAATTGGGAGATGTT…	GPN-loop GTPase 3 OS=Xenopus laevis GN=gpn3 PE=2 SV=1; Accession=GPN3_XENLA; E-value=1.0e-100	A7SY87_NEMVE	A7SY87_NEMVE	A7SY87_NEMVE	0.0574
SEQINDEX13732_C_c	GAACACTCTTGCTTTAGCATAATCAGATGGTGTTCGGTTCATCTTGGACGATTTAAACAAAGATCGGGGATCTTAGTCCGCAAATTTTGCATACATCATGATAGCCTTGCGGTGTCAAGATTATCGCCGGCTGTAGCATTTGAAGGATCTATTTTTCATTAATTTTTTTGGAAGTTAACTCGAAATGAGAGCAGCGTGAAGTCTCAAATAGAGCATCATGGCTGAAGCAGTTAAAGTCATTGTTCGTTGTCGGCCACTAAACCGACGTGAAAAAGATTTGAATTGTGAAGTAGTCGTTCAAATGGACTCATCTTCTGGACAGTGTGCACTAAGTAAGCCTGGGGATAAAAGCCAGCCTCCAAAGACATTTACTTTTGATGGTGCTTATTTTATGGACTC…	CCHX15544.b1_c_s	GGGGAGTGAACATCATTGCACAAGAAGATGGCGATCGAAGCAGCAATCTTTACGTTTCTACTTTTTTCTTTAAGACGAGCGAACACTCTTGCTTTAGCATAATCAGATGCTGTTCGGTTCATCTTGGGCGATTTAAACAAAGATCGGGGATCTTAGTCCGTAAATTTTGCATACATCATGATAGCCTTGCGGTGTCAAGATTATGGCCGGCTGTAGCATTTGAAGGATCTATTTTTCATTAATTTTTTGGAAGTCAACTCGAAATGAGAGCAGCGTGAATTCTCAAATAGAGCATCATGGCTGAAGCAGTTAAAGTTATCGTTCGTTGTCGGCCACTAAACCGACGTGAAAAAGATTTGAATTGTGAAGTAGTCGTTCAAATGGACTCATCTTCTGGAC…	Kinesin-like protein KIF17 OS=Mus musculus GN=Kif17 PE=1 SV=1; Accession=KIF17_MOUSE; E-value=1.0e-156	A7SFN7_NEMVE	A7SFN7_NEMVE	A7SFN7_NEMVE	0.0557
SEQINDEX4938_C_c	CGTGGGCTCCTGGAGGAAGTGATTATGATCCAAACCTCCCTTATGGACCTAAGGTCTACTTAGCAAGGCGGAAAAAGCCGGATCCTTGGTGGGTTACTACAATTGAGGTTTGTGTGGTGGTCGGGGTCCTGCTGTTTTTCGTGTATATGTATTATTGTATGGATCATCTTCATTTTCATGTTTTGAATGCTTATGCTAATGTTGGAGTTTCACATGCACAGCATCATGTTGCCCATAAATACCTGAATGGAAAAGGAGTTGCAAAAGATGAAAAAATGGCATTTTATTGGTTCAGGGAGGCAGCAAACAATGGGCATGGACATGGAGCTTACAATCTTGTGGCTGGACATTTACAAGGATATGATACAGATGTCGAGGAGCATGAGGTGGAACCTCTTC…	Contig4057	GGGGACATATCAAACATGCACACGGTTGTCGACTTAATGGCGGAACGCAAAGAGGACGAAGTACGAAAGAGAAGCAAGGAAACCCCTTCGTGGGCTCCTGGAGGAAGTGATTATGATCCAAACCTCCCTTATGGACCTAAGGTCTACTTAGCAAGGCGGAAAAAGCCGGATCCTTGGTGGGTTACTACAATTGAGGTTTGTGTGGTGGTCGGGGTCCTGCTGTTTTTCGTGTATATGTATTATTGTATGGATCATCTTCATTTTCATGTTTTGAATGCTTATGCTAATGTTGGAGTTTCACATGCACAGCATCATGTTGCCCATAAATACCTGAATGGAAAAGGAGTTGCAAAAGATGAAAAAATGGCATTTTATTGGTTCAGGGAGGCAGCAAATAAT…	NA	A7SMY9_NEMVE	A7SMY9_NEMVE	NA	0.0459
SEQINDEX15718_C_c	GTCATGGTGGCGGAAAAGTTGATGCGTAGATTACTCTGTTTATATTTATTTACTGTGAAATCGTTTCCGTAATCTCGATAGCCATACAGTGAAACTGCTCTCTCTAAGAACGCAGATTTGTATATATGAACGTGACAGCTACGAGTTGACTGGCAATGGCATCTAATATGTATCTGGAACATTACCTTGATAGTATTGAGAACCTTCCATTTGAACTTCAAAGAAACTTCACCCTCATGAGAGAACTTGATCAGAGAACTCAAGATCTATCAAAGGAAATCAGTACAATGTCTGAAGAATATATGGCTAATGTGAGGAGCATGGATTCTGCAAAAAGGACTTCACACCTGAAAAAGATTGAAAATGCATTTGTGAAGAGCAGAGAATATGGTGATGACA…	Contig3525	GGGGAATGCATGCATCTTGTCATGGCGGCGGAAAAGTTGATGCGTAGATTACTCTGTTTATATTTATTTACTGCGAAATCGTTTCCGTTGTCTCAATAACCATACGGTGAAACTGCTCTCTCTAAGAACGCAGATTTGTATATATGAACGTGACAGCTACGAGTTGACTCGCAATGGCATCTAATATGTATCTGGAACATTACCTTGATAGTATTGAGAACCTTCCATTTGAACTTCAAAGAAACTTCACCCTCATGAGAGAACTTGATCAGAGAACTCAAGATCTATCAAAGGAAATCAGTACAATGTCTGAAGAGTATATGGCTAATGTGAGGAGCATGGATTCTGCTAAAAGAACTTCACATCTGAAAAAGATTGAAAATGCATTTGTGAAGAGCA…	Inhibitor of growth protein 4 OS=Homo sapiens GN=ING4 PE=1 SV=1; Accession=ING4_HUMAN; E-value=8.0e-48	A7SFP0_NEMVE	A7SFP0_NEMVE	NA	0.0255
SEQINDEX13271_C_c	AAACTTTCAGTTTCTTAGACCTTGTACCCAAAAAAGGTGAAACTAAGGACTTGACAAAGTATGGCAGAGATGGAATTCGACGATTCCTCGTTCTATNGTTCCCGACCACTGGAAGAAAGATGGCCACCGCTCGGAGCTGCCGGCGATAATATCGCTGAAAATGGGGTAAAGAGCAGCGAACCTCAACAAAAGTCAGACCATGAAAGACTGCAAGATCTTGAAGAGGAACAAGAGGAACTGAATGGCTCTTTGTTGGCACTCACCAGCCATTTTGCTCAGGTGCAGTTCCGTTTGAAACAAGTTGTTTCTGCTCCAGTGGAGACCAGAGAGCGTTTGCTGATGGAGCTTGAAGAGTTTGCTTTTCAAGGATGCCCAGATGTGCGTGGCCCCCATTCAAAG…	CCHX5173.b1_c_s	GGGGTGCCCACAACGCGGACATCTTTACCGAAACGAATGCACATCTGGGAACTGTTCAACGAGTATTACGGAATGAAGCGTGGGAAGGAGTACAATTCCACTCCTGCCAGGCGGTTGTCGGAGGCGTTTGGTATTGAAGTGCATGGAGAAAATGTTGCTACAGCGAAACAGACATTGCTGAGAACTCTTCACAAAATAAAAGCGACACATGAGCCTTGTCGACGGAGCATGGATGCGATGTTTAAGTCTTTGGTTTGCGCAGGATTAAATCAAAGAAGACTTGTTCACTGGTGCCGACTCATAACGAAATGTTCGTCCCTTGTGGAAGAACATTATCAGTCTTGGTCCTTCGTTCTTAAAACAGGAATGAACGAGGCCACAGAGCATCTAGAGCGCTTA…	RUN domain-containing protein 1 OS=Homo sapiens GN=RUNDC1 PE=2 SV=2; Accession=RUND1_HUMAN; E-value=1.0e-48	A7RKZ4_NEMVE	A7RKZ4_NEMVE	NA	0.3091
SEQINDEX8303_C_c	CGAGTTTCCGAAGAGAAAGCGGAGAATAAAAAGCACCGGGGTATACCCGAAGCGCTTTTTCTGGAGGATGTCGACGAATTCATGAAAAAGGGCGGCCATGATGCTGCTGAGTCAGTACTCAAAGAATTGGATGAAAACCACCAGAAGTATAAATTTATGGAATTGAATTTGCTTTCAAGAAAAAAAAGGTTACAAATTCAAGTCCCCGATTTGAATTCAAGTTTAGAAATGGTCAAGTTATTGTCATCAAGGAAGGACAGTTCTAAGCCACTGCAGAGCAGGTTTTTACTCTCTGATCAGCTTTACTGCACTGCTGATGTGCCACCAACAGAAAAAGTCATGCTTTGGCTTGGGGCAAATGTTATGTTAGAATACAGCATCGCAGAAGCAGAAGCCTTA…	Contig6477	GGGGGTCATTGGGAGAAAACAAACATGGCGTCGGAACAGAAGTCATCCGAGCGAGTTTCCGAAGAGAAAGCGGAGAATAAAAAGCACCGGGGTATACCCAAAGCGCTTTTTCTGGAGGATGTTGACGAATTCATGAAAAAGGGCGGCCATGATGCTGCTGAGTCAGTACTCAAAGAATTGGATGAAAACCACCAGAAGTATAAATTTATGGAATTGAATTTGCTTTCAAGAAAAAAAAGGTTACAAATTCAAGTCCCCGATTTGAATTCAAGTTTAGAAATGGTCAAGTTATTGTCATCAAGGAAGGACAGTTCTAAGCCACTGCAGAGCAGGTTTTTACTCTCTGATCAGCTTTACTGCACTGCTGATGTGCCACCAACAGAAAAAGTCATGCTTTGG…	Prefoldin subunit 3 OS=Pongo abelii GN=VBP1 PE=2 SV=1; Accession=PFD3_PONAB; E-value=2.0e-59	A7T0Y5_NEMVE	A7T0Y5_NEMVE	NA	0.2808
SEQINDEX10405_C_c	GGTGAAGGTGACACTTCCTCTCCTTCTGTGACACGACAAGCAGTTTTCAAATGAGCGAACAGAACACATTGACTGTGTTAGAGAACTCTTGCAATCGTGAAGATGAGGACACCAAGGATCTTCCGACTGAAGATGAAAGTGGCGTGTTGTTTTATGTAAATAAAGATGGATTTCCCATCAAGGAAAAAACCTGGGAAAGAATGTGGCAACATGTTGAAAAGATTCATCCCAAGGGACCTCAAATAGCACAGAGTATAAGAGATAATCAGAAGTTAGACAAGGTCCCATATGTGAGTGCACCTGTGTTCACATCTTTCATGTCAGTTGAAGAAAAGCTGGGACTAGTGCAGAACTATTTGCAACAACTGCAATATAATCATACGGGCACTCAATTTTTTG…	Contig530	GGGCAGCTTTAAGACAAACTTCAATGGTCGCTTCTACAGGCATGTGGTTCTGGGGGTACATTATTACGGAAAATTTGGAACATTGGGACTCAGCAGGAGAAATGATCTAATGTTCAAATCACTTAAATTCAAGAGCCTTTTTGACCTACTTGAAGATTTCACAGTGTCCTACAACAATTATCATCACATTCTGAAGAAGATTAAACTGAGTTTACCTGTTGTCCATGATACTCATAGCTGTGAGAGGATTCAGTGGAAGTACTTGACACTCAGTCCTTTGAAGACGTGTCAGCTGGACATGAAAAAGGTGCTGGACAAGTTTACACGAGAGATTAGAATCACATTTCATCAGTACCAAATTAGCTCGCCAAGAAAGTCTGACAATCAAACATCCGATAA…	Vasohibin-1 OS=Homo sapiens GN=VASH1 PE=1 SV=1; Accession=VASH1_HUMAN; E-value=3.0e-63	A7S7P4_NEMVE	A7S7P4_NEMVE	NA	0.1836
SEQINDEX3365_C_c	GGAATCGATTTTAAAGTGAAGACGGTCTTTCGCAACGACAAGCGAGTCAAACTACAAATATGGGACACAGCTGGACAAGAAAGGTATCGCACCATAACAACTGCATATTACCGTGGGGCGATGGGTTTTATACTCATGTACGACATTTCCAATGAAGAGTCTTTCCAGGCAGTTCAAGACTGGTCAACACAAGTGAAGACATACTCCTGGTCAAACGCTCAGGTAATACTTGTTGGCAACAAGTGCGACATGGAGGAAGACAGAGTGGTGTCGTATGATAGAGGCAAACAGCTAGCTGATCAGCTAGGGCTGGAGTTCTTTGAGACAAGTGCCAAAGATAACGTAAATGTCAAGCAGGTGTTTGAACGACTGGTGGACATCATATGTGATAAGATGTCA…	Contig1413	GGGGGGGCGAAGGGAAACATGGCGAACGCGAACGATAAGCAGTGGCAGAAGGATGCAGCCGATCAAAATTTCGATTACATGTTCAAGCTCTTGATCATTGGTAATTCTGCTGTGGGGAAGACGTCATTTCTTTTCCGCTACGCCGATGATTCCTTCACCTCAGCATTCGTTTCCACGGTGGGAATCGATTTTAAAGTGAAGACGGTCTTTCGCAACGACAAGCGAGTCAAACTACAAATATGGGACACAGCTGGACAAGAAAGGTATCGCACCATAACAACTGCATATTACCGTGGGGCGATGGGTTTTATACTCATGTACGACATTTCCAATGAAGAGTCTTTCCAGGCAGTTCAAGACTGGTCAACGCAAGTGAAGACATACTCCTGGTCAAATGCT…	Ras-related protein Rab-3 OS=Drosophila melanogaster GN=Rab3 PE=1 SV=1; Accession=RAB3_DROME; E-value=3.0e-73	A7SMW8_NEMVE	A7SMW8_NEMVE	A7SMW8_NEMVE	0.1242
SEQINDEX10895_C_c	ATAAACCGACGATCGCCATTTTTGACAGAGTATATTGAAAAGATGGGACAAGATTATTACGCAGTTTTGGGCCTCACGAAAAGTGCCAATGATGCAGATATCAAAAAAGCTTATCGTAAGTTGTCCTTGAAATTTCACCCTGACAAAAACCAAGAACCGGGAGCAGATTTGAGATTCAAACAAGTCGCAGAAGCATATGATATACTGAGTGATCCCAAAAAGAGAGCAATTTATGACCAATTTGGTGAAGAAGGACTGAAAGGAGGAGTTCCAGAAAAAGACGGTTGGACATCTGGTTACACTTTTCATGGAGATGCAGCCAGAGTGTTTACAGAGTTTTTTGGTGGAGAAAATCCTTTTGCAGAGTTATTTGATTCACATGATCCAGAAGTTGGATTT…	Contig4551	GGGGAAAGCGACGATCGCCATTTTTGACAGAGTATATTGAAAAGATGGGACAAGATTATTACGCAGTTTTGGGCCTCACGAAAAGTGCCAATGATGCAGATATCAAAAAAGCTTATCGTAAGTTGTCCTTGAAATTTCACCCTGACAAAAACCAAGAACCGGGAGCAGATTTGAGATTCAAACAAGTCGCAGAAGCATATGATATACTGAGTGATCCCAAGAAGAGAGCAATTTATGACCAATTTGGTGAAGAAGGACTGAAAGGAGGAGTTCCAGAAAAAGACGGTTGGACATCTGGTTACACTTTTCATGGAGATGCTGCCAGAGTGTTTACAGAGTTTTTTGGTGGAGAGAATCCTTTTGCAGAGTTATTTGATTCACATGATCCAGAAGTTGGAT…	DnaJ homolog subfamily B member 13 OS=Mus musculus GN=Dnajb13 PE=2 SV=1; Accession=DJB13_MOUSE; E-value=1.0e-114	A7SC61_NEMVE	A7SC61_NEMVE	A7SC61_NEMVE	0.1167
SEQINDEX3550_C_c	AGGAATGGAAAGATGTAACACCTGTAGAACAAGATGACGGGCCTTATCCAGTTGTGGCCATCGCATACTCTGAGAAATTCAAAGATGTGTTTGACTACTTCCGTGCTGTGCTTATGGCAGATGAGAGAAGTGAACGAGCCTTCACACTTACTGAAGATGCAATTAGCCTGAATGCTGCTAATTACACAGTTTGGCATTTCCGCAGAGTTCTCCTAAAGTCTCTCAACAAGAATTTAGTGGAGGAGTTACATTTTGTTGGGGAAGTTATAAGTGGACAACCAAAAAATTATCAAGTGTGGTATCACAGAAAAGTCATAGTGGAATGGCTGAAAGATCCCAGTGCTGAACTCCAATTTACTGAAAATATCTTGGAACTTGATGCAAAGAACTACCATGCGT…	CCHX8228.b1_c_s	GGGGACCTTGCCTCGTTTAAAGATGGCGGAGAGTTCGGGCGATGAGGATTGTACAGAAACTGATTTTGTGTTTTATCGTGATCGAGAGGAATGGAAAGATGTTACACCTGTAGAACAAGATGACGGGCCTTATCCAATTGTGGCCATCGCATACTCTGAGAAATTCAAAGATGTGTTTGACTACTTCCGTGCTGTGCTTATGGCAGATGAGAGAAGTGAACGAGCCTTCACACTTACTGAAGATGCAATTAGCCTGAATGCTGCTAATTACACAGTTTGGCATTTCCGCAGAGTTCTCCTAAAGTCTCTCAACAAGAATTTAGTGGAGGAGTTACATTTTGTTGGGGAAGTTATAAGTGGACAACCAAAAAATTATCAAGTGTGGTATCACAGAAAAGT…	Protein farnesyltransferase/geranylgeranyltransferase type-1 subunit alpha OS=Bos taurus GN=FNTA PE=2 SV=2; Accession=FNTA_BOVIN; E-value=1.0e-106	A7RH36_NEMVE	A7RH36_NEMVE	A7RH36_NEMVE	0.1148
SEQINDEX19360_C_c	GGACTCAGACTAATGAACGGAACTCGAGAAACTATGAATAGTACCATGTCCGAAACTAAGTCAGGTTATTTGGTATTAACTCCGGACGCCGATTGCAATCATCAGATACGATTGATGGCATGTGCTTATACCAAGATTTCAGAGCCGTTTGTAGTATTTTACAGTGAATCTGCCTGGATTTGGAAAAAGCCATGCGCGTTTTTGCGGCTGAAGTCGTGTCAGATCACAGAAAACAGCGATGTTTCATTTACTCTGACTCCACAAGGAGAGAGGATGGGAAATTCAACAGGAACGCTTTGCTTTAGTGCAGAGAACCCCAAAGAGAAACAAGAATGGGTGAAAGTTTTAAATGTCTGTCAGAGAGGGAACGAAAAGACTGTCACGAAAATGAACAACAAC…	Contig274	GGGGACAGTTGTAGGTTGGCATATTGGACTCGATACCGTGACTGACTCCACAGCTTATAAAATCGAGAAACAAAACTGAATTTGTCACCCAGACTAATGAACGGAACTCGAGAAACTATGAATAGTACCATGTCCGAAACTAAGTCAGGTTATTTGGTATTAACTCCGGACGCCGATTGCAATCATCAAATACGACTGATGGCATGTGCTTATACCAAGATTTCAGAGCCGTTTGTAGTATTTTACAGCGAATCTGCCTGGATTTGGAAAAAGCCATGCGCGTTTTTGCGGCTGAAGTCGTGTCAGATCACAGAAAACAGCGATGTTTCATTTACTCTGACTCCACAAGGAGAGAGGATGGGAAATTCAACAGGAACGCTTTGCTTTAGTGCAGAGAAC…	NA	A7SE94_NEMVE	A7SE94_NEMVE	A7SE94_NEMVE	0.1157
SEQINDEX14527_C_c	TCATTCTAAGATGGATGAAAAACTTCAAGAGAATACAATGGATCCAGAGGATACTTTTCCAAAAATTGATGTGAATCGAAGCCGCTTTCCTTACTGCATTGTATGGACTCCAATCCCTGTCCTTACATGGATCTTTCCCTTCATTGGACACATGGGGATTGGCATGTCTTCTGGTGTAATTAGGGATTTTGCTGGCCCATACTATGTTTCGGAGGATGACATGGCCTTTGGGAAGCCTACAAAGTTTTGGCGCTTGAATCCATCAAAAACTGCAAGCTTACAGAACAGTTGGGATGTCGCTATCTCTTCTGCCTCAGAAGAATACAAACACAGAATGCACAATCTTTGTTGTGACAACTGCCACTCTCATGTTGCTATGGCCCTAAATACCATGCAATA…	Contig3618	GGGGGAATTGTTCGCAAAAATCAACAAGGCGAATAGGGCAGAAATTGTCGTGAAACAAAATTAACCATGTTATCATTCTAAGATGGATGAAAAACTTCAAGAGAGTACAATGGATCCAGAGGATACTTTTCCAAAAATTGATGTGAATCGAAGCCGCTTTCCTTACTGCATTGTGTGGACTCCAATCCCTGTTCTTACATGGATCTTTCCCTTCATTGGACACATGGGGATTGGCATGTCTTCTGGTGTAATTAGGGATTTTGCTGGCCCATACTATGTTTCGGAGGATGACATGGCCTTTGGGAAGCCTACAAAGTTTTGGCGCTTGAATCCATCAAAAACTGCAAGCTTACAGAACAGTTGGGATGTCGCTATCTCTTCTGCCTCAGAAGAATACAA…	Transmembrane protein C1orf160 OS=Homo sapiens GN=C1orf160 PE=1 SV=2; Accession=CA160_HUMAN; E-value=9.0e-66	A7RLA6_NEMVE	A7RLA6_NEMVE	A7RLA6_NEMVE	0.1126
SEQINDEX16349_C_c	GCAGTGTTGTCGCTCAACACAAATATTAACAATGTCTACATCGGCGAGAAGACGTTTAATGAGGGATTTTAAAAGACTTCAGGAAGATCCACCAGCAGGAGTTAGTGGTGCTCCATCTGAAAATAATATTATGATTTGGAATGCCGTTATATTCGGGCCTCAAGATACGCCATTTGAGGACGGGACCTTTAAATTACAGATGGAATTTACAGAAGAATATCCTAACAAACCACCGACTGTTAGGTTCGTCTCGAAAATGTTTCACCCAAATGTGTATGCTGATGGAGGCATCTGCTTAGATATTCTTCAAAATCGCTGGAGCCCTACATATGATGTGTCATCAATTCTCACTTCAATACAATCCCTACTAGATGAACCAAACCCGAATAGTCCAGCCAA…	Contig3716	GGGGGAGATTGCAGTGTTGTCGCTCAACACAAATATTAACAATGTCTACACCGGCGAGGAGACGTTTAATGAGGGATTTTAAAAGACTTCAGGAAGATCCACCAGCAGGAGTTAGTGGTGCTCCATCTGAAAATAATATTATGATTTGGAATGCCGTTATATTCGGGCCTCAAGATACGCCATTTGAGGACGGGACCTTTAAATTACAGATGGAATTTACAGAAGAATATCCTAACAAACCACCGACTGTTAGGTTCGTCTCGAAAATGTTTCACCCAAATGTGTATGCTGATGGAGGCATCTGCTTAGATATTCTTCAAAATCGCTGGAGCCCTACATATGACGTGTCATCAATTCTCACGTCAATACAATCCCTACTAGATGAACCAAACCCGAATA…	Ubiquitin-conjugating enzyme E2 A OS=Mus musculus GN=Ube2a PE=2 SV=1; Accession=UBE2A_MOUSE; E-value=1.0e-77	Q6PB14_XENLA	Q6PB14_XENLA	Q6PB14_XENLA	0.1043
SEQINDEX8701_C_c	ATCGTTTGCATCTGAGATTGTAACGTTTATTAAATCTCTTTCTTCCCCTGTGCAAATCCTTGGACTGATTATTATTGCATTTCTCATTCGAAAGATTGTGCAGTCCAAATTTCGCAAACCACCTCCCCCGCCCCGAGAAAAGCCGCTTGAACCCATGAAGAAGCGCGATTTCACTCCCCAAGAGCTATTAGAATACGATGGCGTGAAGCAAAAGCGAGTTCTCCTTGCTGTAAACTTCAAGGTGTTTGATGTCACCCGTGGGAAAGATTTCTATGGTCCTGGGGGTCCATACAGCGTGTTTGCTGGGCATGATGCCAGCAGAGGTCTTGCAACTTTTTCTGTGGGACCTGATGCTGTCAAGGCTGAATGTGACGATTTGTCGGATTTGAATAACATGCA…	Contig6784	GGGGGCGCTATTGTTAGCTGCTTTCTTTCAAAATGGTCCTCGCATCGTTTGCATCTGAGATTGTAACGTTTATTAAATCTCTTTCTTCCCCTGTGCAAATCCTTGGACTGATTATTGTTGCATTTCTCATCCGAAAGATTGTGCAGTCCAAATTTCGCAAACCACCTCCCCCGCCCCGAGAAAAGCCGCTTGAACCCATGAAGAAGCGCGATTTCACTCCCCAAGAGCTATTAGAATACGATGGCGTGAAGCAAAAGCGAGTTCTCCTTGCTGTAAACTTCAAGGTGTTTGATGTCACCCGTGGGAAAGATTTCTATGGTCCTGGGGGTCCATACAGCGTGTTTGCTGGGCATGATGCCAGCAGAGGTCTTGCAACTTTTTCTGTGGGACCTGATGCTG…	Membrane-associated progesterone receptor component 2 OS=Rattus norvegicus GN=Pgrmc2 PE=1 SV=1; Accession=PGRC2_RAT; E-value=1.0e-34	A7RN50_NEMVE	A7RN50_NEMVE	NA	0.0993
SEQINDEX4046_C_c	ACTTTGTAAAGAGAGCACAGATCTGAGGAGATCTCCGAACTTAATCACAGCGCTTGGGACAGAGAATGCTTCGTATGAAGCTGACTCCACAGAAAAGCTTGATTCAGAAGACTTTATCCATGAAGACAGCGTTGAATTACAGACGGAAATTCCAAGTACAAAAAAGCGAAAGCGACGAGTGTTATTCTCTAAAGCGCAGATTTACGAACTCGAGCGACGCTTTCGACAGCAGAGATACCTGTCGGCACCGGAACGCGAACAACTCGCAAGGCTGATAAATCTCTCGCCAACGCAAGTCAAAATATGGTTTCAGAATCATCGATACAAATACAAAAAGCAAGTGGGAGAAAAAGGACATTTACATTTCACAACCGGTGAGGGATTGCCAGCCTATGCAGG…	Contig1214	GGGGACGCGCGCATATTTTATGGAATCAATGCGCAGCTTATAACAAGACCTAAACTATTCTATCTTTCAAATCCGGATGAAGGCCCTGCGATGTCTTCGTTTTCGATAAATAGTCTCCTCGATCTACAAGAAAGTGAGTATGGCTCTTCCTCGCTTAATCGAGCGCGGAAACAGACGTTCACTCTACAGAAACCAGCTTCACTTTGTAAAGAGAGCACAGATCTGAGGAGATCTCCGAACTTAATCACAGCGCTGGGGACAGAGAATGCTTCGTATGAAGCTGACTCCACAGAAAAGCTTGATTCAGAAGACTTTATCCATGAAGACAGCGTTGAATTACAGACGGAAATTCCAAGTACAAAAAAGCGAAAGCGACGAGTGTTATTCTCTAAAGCGCAG…	Homeobox protein XENK-2 OS=Xenopus laevis PE=2 SV=1; Accession=HNK2_XENLA; E-value=2.0e-29	A0MV35_ACRMI	A0MV35_ACRMI	A0MV35_ACRMI	0.0967
SEQINDEX15751_C_c	AGGGTGGAAATCATTCGTATTTCTGAAGTTGGTCATTTTCAGCAGCATCTCATCACAACCCGGAGGCGTAACGAAGGCCTGGACCTTGGGACTTTATCGACGGTGTTGGTTGATTTAGTAATCAACCATGCCGCTCATAAAGCGGTCTGTAAATCCGACCGAGCTAAGCCGTGGCAAGTTAGCCGATGGGCTAAAGAGTGAGCTAGAGGCAGTGTCGGTCAATACGTTGTGCGGGATAATGCGACAACTAAGCAGCATTTCAAAGCATGCCGAGGACTTGTTTGGAGAATTATGCGCAGAGACAAACAACGTCTTTCAGAGAACAAACTCTCTTCAAGAGAGAATTCAGAATTTGTCGCACAAGGTGACCCAGTTAGATTCAAATGTGGAGGAGGTTTC…	CCHX7234.b1_c_s	GGGGGAGTGAGGGTGGAAATCATTCGTATTTCTGAAGTTGGTCATTTTCAGCAGCATCTCATCACAACCCGGAGGCGTAACGAAGGCCTGGACCTTGGGACTTTATCGACGGTGTTGGTTGATTAGAAATCAACCATGCCGCTCATAAAGCGGTCCGTAAATCCGACCGAGCTAAGCCGTGGGAAGTTAGCCGATGGGCTAAAGAGTGAGCTGGAGGCAGTGTCGGTCAATACGTTGTGCGGGATAATGCGACAACTAAGCAGCATTTCAAAGCATGCCGAGGACTTGTTTGGAGAATTATGCGCAGAGACAAACAACGTCTTTCAGAGAACAAACTCTCTTCAAGAGAGAATTCAGAATTTGTCGCACAAGGTGACCCAGTTAGATTCAAATGTGGAG…	Wiskott-Aldrich syndrome protein family member 3 OS=Homo sapiens GN=WASF3 PE=2 SV=2; Accession=WASF3_HUMAN; E-value=3.0e-52	A7SRY9_NEMVE	A7SRY9_NEMVE	NA	0.0927
SEQINDEX5539_C_c	AGTAACGTAGGTGGTGTGTGGGACATATAATCCACCACACGGAACAGATGTCGACGTTCTTGTAAAGTGTTACTGGTTTCACGTCATACTCATATCAAAGAGAGAGATCAGGAGGCATCCTACCTGTTTGCTTGGTTAATCCAGCTGAAAAGAGGGAATTGTTCATGAGTAACGCAAGGTTATCCACTATACATAATCACTTAACTACAAGGAAGCATTCGTGCAGCGACAAAGTCTTGATGACAGGAAGCCCCCTTACAACTCATGTGTTGGATACAGCAAGAGGCATTCCAGCCAGGAATGTGCAGATACAGCTGTACTTTGAAGAACTCAGACCAGATAGTCGAATGTGGAAACACATTGCCTCAGGAGTTACCAATACTGATGGGAGAGTTACTG…	Contig1655	GGGGGACAGAGTTTTGTTATTCTACATTCTGAGGAGTAACGTAGGTGGTGTGTGGGACATATAATCCACCACGCTGAACAGAAGTCGACATTCTTGTAAAGTGTTACTGGTTTCACGTCATACTCATATCAAAGAAAGAGATCAAGAGGCATCCCACCTGTTTGCTAGGTTAATCCAGCTGAAAAGAGGGAATTGTTCATGGGTAACGCAAGGTTATCCACTATACATAATCACTTAACTACAAGGAAGCATTCTTGCAGTGACAAAGTCTTGATGACAGGAAGCCCCCTTACAACTCATGTGTTGGATACAGCAAGAGGCATTCCAGCCAGGAATGTGCAGATACAGCTGTACTTTGAAGAACTGAGACCAGATAGTCGAATGTGGAAACACATTGCC…	5-hydroxyisourate hydrolase OS=Danio rerio GN=urah PE=1 SV=1; Accession=URAH_DANRE; E-value=3.0e-29	B2B9J9_CERAE	B2B9J9_CERAE	NA	0.0908
SEQINDEX14619_C_c	TGGTTTGGCAGTTCGATGGAATCATTTTGAAATGCGTTCTAGAAAATTGGCATTTTTAGTGATTTGGCCGTATTAGAAAGCTTAGCATGGATGTTGATTGCGACTTCGACAGCGATCTTTTGTCAAAGTTTAGTTGTCTTGGAACAACGGACCGCGATGTTCTTATAAATGAGCTTCAACGGTTGTTAGATTTTCAACTGAATCCCACAGGATGCGCTTTCTTTCTTGACATGACAAATTGGAACCTTCAGGCGGCAATTGGGGCATATTATGACTTTAATAGTACTCAGGACAAGTTACCAAGTATGACATTTGTTCGTGATGTGACCATCGGTGAAGGGGAATCTGTCCCACCCAACACAACATTTGTGAAAACTTGGAGAATTCAAAATAATGGTA…	Contig4171	GGGGGACAGCATCTTGGTTTGGCAGTTCGATGGAATCATTTTGAAATGTGTTCTAGAAAATTGGCGTTTTTAGTGATTTGGCCGCATTAGAAAGCTTAGCATGGATGTTGATTGCGACTTCGACAGTGATCTTTTGTCAAAGTTTAGTTGCCTTGGAACAACGGACCGCGATGTTCTTATAAATGAGCTTCAACGGTTGTTAGATTTTCAACTGAATCCCACAGGATGCGCTTTCTTTCTTGACATGACAAATTGGAACCTTCAGGCGGCAATTGGGGCATATTATGACTTTAATAGTACTCAGGACAAGTTACCAAGTATGACATTTGTTCGCGATGTGACCATTGGTGAAGGGGAATCTGTCCCACCCAACACAACATTTGTGAAAACTTGGAGAAT…	Uncharacterized protein C6orf106 OS=Homo sapiens GN=C6orf106 PE=2 SV=2; Accession=CF106_HUMAN; E-value=1.0e-71	A7RLM7_NEMVE	A7RLM7_NEMVE	NA	0.0585
SEQINDEX4550_C_c	GACACACTCGTCGTTCTCTATAATCATACATTACATCAACTCAGGCCACAAGTTGTCAGCGTGAAAATGTCCAAGCCAACGCAAGAGGAAATAGATGAGTATAGAGACGCATTCAGTCTCTTTGACACTGAAGGTGACGGGAAAATTGATGTCGAGCAGATTGGAAGCGTTCTTCGTTCACTGAACCTAAATCCTGCTGACGAAGATATCCTTAAGATAGAAAAAGACGTCGGTGATCGACGTGTGTCATTTGAGGAGTTCTTGTCAATTTTCCTGGAGGAGAAAAAGAATGCTAAGAAAGTGTCGGTTGAAGAGTTCATAGACACACTGAGCGCCTTTGACAAAGATAACGCTGGCAAAGTGTCATCCGGGGAATTACGTCACGTCCTAACTTTGCTA…	Contig1763	GGGGGACACACTCGTCGTTCTCTTTAATCATACATTACATCAACTCAGGCCACAAGTTGTCAGCGTGAAAATGTCCAAGCCGACGCAAGAGGAAATAGATGAGTATAGAGACGCTTTCAGTCTCTTTGACACTGAAGGTGACGGGAAAATTGATGTCGAGCAGATTGGAAGCGTTCTTCGTTCATTGAACCTAAATCCTGCTGACGAAGATATCCTTAAGATAGAAAAAGACGTCGGTGATCGACGTGTGTCGTTTGAGGAGTTCTTGTCAATTTTCTTGGAGGAGAAGAAGAATGCTAAGAAAGTGTCGGTTGAAGAGTTCATAGACACACTGAGCGCCTTTGACAAAGATAACGCTGGCAAAGTGTCATCCGGGGAATTACGTCACGTCCTAACTTT…	Myosin-2 essential light chain OS=Drosophila melanogaster GN=Mlc-c PE=1 SV=1; Accession=MLC2_DROME; E-value=4.0e-25	A7RGK2_NEMVE	A7RGK2_NEMVE	O96949_GEOCY	0.0546
SEQINDEX6813_C_c	TTTTGAAGCACATATCCTGGAAGTAAAATATTTGTCAAAGAAATGTCTGGTTACGACGACCCCATTTCAGACGCAGAAAAGGTGCGGATAGCATCTGACTTCATCAAACACGCCCCACCAGGGGAATTCAACGAAGTGTTCAACGATGTCCGCATTTTGTTGAACAATGACAAGTTACTGAAAGAAAAAGCCGCAAGCTCTTTCTCAGAGTACAACAAGGAGCAGTTTACTCCGGTGAAGCTTGAAGGTGCTTCTGAGCAAGTGTTGGTGACCAAATATGGTGAGCTGCCTGATGGAAAGTTTTATGATCCCAAAAGTAAGAAGAGCTTTTATTATGATCACTTGAGGAAGGAAGCAAGTGAACCTGGTCCTTATGATGCTAACCCAACAGCTGAACCA…	Contig3648	GGGGAGGCGATCGTTGCAACAGCCGCCATTTTGAAGCACATATCCTGGAAGTAAAATATTTGTCAAAGAAATGTCTGGTTACGACGACCCCATTTCAGACGCAGAAAAGGTGCGGATAGCATCTGACTTCATCAAGCACGCCCCACCAGGGGAATTCAACGAAGTGTTCAACGATGTCCGTATTTTGTTGAACAATGACAAGTTACTGAAAGAAAAAGCCGCAAGCTCTTTCTCAGAATACAACAAGGAGCAGTTTACTCCGGTGAAGCTTGAAGGTGCTTCTGAGCAAGTGTTGGTGACCAAATATGGTGAGCTGCCTGATGGAAAGTTTTATGATCCCAAAAGTAAGAAGAGCTTTTATTATGATCACTTGAGGAAGGAAGCAAGTGAACCTGGTCC…	F-actin-capping protein subunit alpha-2 OS=Didelphis marsupialis virginiana GN=CAPZA2 PE=3 SV=3; Accession=CAZA2_DIDMA; E-value=1.0e-109	A7S181_NEMVE	A7S181_NEMVE	NA	0.0508
SEQINDEX2222_C_c	GCACGAGCAGAGCCACGTCGAAGGAAGTTCAAACAGTAGAGGCATCCCAAGATCTCATCATGTCGGGTTCTATTGACACAAACTGTATGACACTGACCCGGTTCGTTCTTCAAGAACAACGTAAAATTCCTGGGGCTACAGGCGACCTCAGTCAGTTACTTAATGCCATTTGCTGCGCTATCAAAGCAGTTTCTTCAGCTGTAAGAAAGGCAGGGATAGCTAAACTGTATGGCATTGCAGGAGATGTCAATGTATCCGGTGACCAACAGCAAAAGCTGGATGTCATGGCAAATGAATTGTTTGTCAACATGTTGAAATCTTCCTACTCAACTTGTCTACTAGTTTCAGAGGAAGACGAACAAGTAATTGAGGTTGAAACTGAAAAGCAAGGCAAATACT…	Contig2363	GGGGAATTTGGGAGTTCACAGAGCCACGTCGAAGGAAGTTTAAACAGTAGAGGCATCCCAAGATCTCATCATGTCGGGTTCTATTGACACAAACTGTATGACACTTACCCGGTTCGTTCTTCAAGAACAACGTAAAATTCCTGGGGCTACAGGCGACCTCAGCCAGTTGCTAAATGCCATTTGCTGCGCTATCAAAGCAGTTTCCTCAGCTGTAAGAAAGGCAGGGATAGCTAAACTGTATGGCATTGCAGGAGATGTCAATGTATCAGGCGACCAACAGCAAAAGCTGGATGTCATGGCAAATGAATTGTTTGTCAACATGTTGAAATCTTCCTACTCAACTTGTCTGCTAGTTTCAGAGGAAGACGAACAAGTAATCGAAGTTGAAACTGAAAAGCA…	Fructose-1,6-bisphosphatase 1 OS=Oryctolagus cuniculus GN=FBP1 PE=1 SV=3; Accession=F16P1_RABIT; E-value=1.0e-114	A7SNH7_NEMVE	A7SNH7_NEMVE	NA	0.0467
SEQINDEX10830_C_c	CAAAGCTGAGAAAGGGTTGTTATCCTACCAGAATTTCATAGAGATCATGAAGGAGACAATGCAGGCTATGACACATTGGGGGAAATTGAAAACTGTTTTGGAAGGCTACGTAGGTTTTGACACTGTGCAAGAGCAGATTCGGAAGAAGTCACTCAAACGAGGCTTTGAATTCAACCTTATGGTTGTTGGTGCAACTGGTCTTGGCAAGTCCACTATGGTAAACACGTTGTTCAAAGGACGGCTAAGTAGAATTTCATCCACTGGAACTGCTGCTGCAATACCCAAGACAGTAGAAGTCAAATCAGTTAGTCATGTGATTGAGGTGAAAGGTGTACGATTAAAGCTCACAATTACAGATACTCCAGGATTTGGTGACCAGATAAACAATGAAAGCTGTTG…	Contig6284	GGGAAGTCATATGATGTCTTTTATTGCCGAAACCGCGTGCATGATTTACTTAATATACTTGACAACAGCAAGTCAATACGCTTCACTTGGATCGGCATTTCACACTCATGGATTCGGAAATTCCTGAAAATTCTACATTTTTTGAGTCATTGTCTAAGGTCTTCAAGTTTGCTGATGTTGAAGAGACGGGATTTGTTGATGTGGCAACAATCTCCACCCTGGCTGTCCAACTTCTGGGAGCACAACTTAGTGAAAGTGAAAAAGAGACAATAAACAGCAAAGCTGAAAACAAAGCTGAGAAAGGGTTGTTATCCTACCAGAATTTCATAGAGATCATGAAGGAGACAATGCAGGCTATGACACACTGGGGAAAATTGAAAACTGTTTTAGAAGGCTATG…	Septin-9 OS=Mus musculus GN=Sept9 PE=1 SV=1; Accession=SEPT9_MOUSE; E-value=5.0e-43	A7RKG1_NEMVE	A7RKG1_NEMVE	A7RKG1_NEMVE	0.0346
SEQINDEX4827_C_c	TTGGAGAGATGTTTTATCACATATCATTGGAGCACGAGATTTTGCTTCATCCTCGATATTTTGGACCGAACCTTCTGCAAACAGTGAAGCAGAAACTGTTCACAGAAGTTGAAGGGACTTGCAGTGGAAAGTATGGCTTCATCATAGCAGTCACAACAATTGACAATATTGGAGTGGGACACATTCAGCCTGGAAGAGGGTTCGTGGTTTACCCTGTGAAATATAAGGCCATTGTTTTCAGACCATTTAAGGGAGAAGTTTTGGATGCTGTTGTTACACAAGTAAATAAAGTTGGGCTGTTTACAGAGATTGGTCCCTTGTCTTGTTTTGTGTCAAGACATTCAATCCCGTCAGATATGGAGTTTGCCCCAAACTCCAATCCACCTTGTTACAAGACTA…	Contig718	GGGGACACCAATTAGTACCCCACCGCTTGCATGTGTCTTTGAGAGATGTTTTATCACATATCATTGGAGCACGAGATTTTGCTTCATCCTCGATATTTTGGACCAAACCTTCTGCAGACAGTGAAGCAGAAACTCTTTACAGAGGTTGAAGGGACTTGCAGTGGAAAGTATGGCTTCATCATAGCAGTCACAACAATTGACAATATTGGAGTGGGGCACATTCAACCTGGGAGAGGGTTTGTTGTCTACCCTGTGAAATATAAGGCCATTGTTTTCAGGCCATTTAAGGGAGAAGTTTTGGATGCTGTTGTTACACAAGTAAATAAAGTTGGGCTGTTTACAGAGATTGGTCCCTTGTCTTGTTTTGTGTCAAGACATTCAATCCCGTCAGATATGGAG…	DNA-directed RNA polymerase II subunit RPB7 OS=Rattus norvegicus GN=Polr2g PE=2 SV=1; Accession=RPB7_RAT; E-value=1.0e-80	A7SAY0_NEMVE	A7SAY0_NEMVE	NA	0.0262
SEQINDEX11628_C_c	TCTTTGGCTGCCATCATGGCCCTTGTAATTCCCGAGAAATTTCAACACATTTTGCGTGTGCTCAACACCAACATTGATGGAAAGCAAAAAATTATGTTTGCGTTGACAAATATAAAGGGTGTGGGGCGAAGGTATGCCAACATTGTATGCAAAAAGGCGGACATTGACATGAACAAACGAGCAGGAGAATTGACAGATGATGAGGTGGAACGAGTGGTTACCATCATGCAAAACCCTCGTCAATACAAGATTCCAGATTGGTTCCTTAACAGGCAAAAGGACATTAGGGATGGAAAGTACTCTCAGTTGCTGTCCAACAATCTTGAAAGTAAGCTTCGAGAAGATCTCGAGAGATTAAAGAAGATACGTGCGCACCGTGGGCTACGTCATTACTGGGGC…	Contig3673	GGGGCTCTCTTTGGCTGCCATCATGGCCCTGGTAATTCCCGAGAAATTTCAACACATTTTGCGTGTGCTCAACACTAATATTGATGGAAAGCAAAAAATTATGTTTGCGTTGACTAATATAAAGGGTGTAGGGAGAAGGTATGCCAACATTGTATGCAAAAAGGCAGACATTGACATGAACAAACGTGCAGGAGAATTGACAGATGATGAGGTGGATCGAGTGGTTACCATCATGCAAAACCCTCGTCAATACAAGATTCCAGATTGGTTCCTTAACAGGCAAAAGGACATTAGGGATGGAAAGTATTCTCAGTTGCTGTCCAATAACCTTGAAAGTAAGCTTCGAGAAGATCTTGAGAGATTAAAGAAGATACGTGCGCACCGTGGGCTACGTCATTA…	40S ribosomal protein S18 OS=Branchiostoma belcheri GN=RPS18 PE=2 SV=1; Accession=RS18_BRABE; E-value=2.0e-67	A7SH82_NEMVE	A7SH82_NEMVE	A7SH82_NEMVE	0.0209
SEQINDEX9880_C_c	TGTAATGCTCCACTGTCCAACAGAAGCGAGGCTGTTCAGTTATTATCCGATAAAGCATGCTGTTCTGATGCAGCTTCGGTTTGATGGTCGGTTTGGGTTTCCTGGGGGCTTTGTGGATGGCAATGAAGATCTGGAGACAGCTTTAAACAGAGAGGTTGTTGAAGAGTTGGGCAAGACATCTGAACCAGTAAACATCACCAAAGATGACTATGTCATTTCTCACAGATATGAAGAACATGTTTCTCAATTAAGCATGACCAAGAGACTTTGCCTACATTTTTTTGCAAAGAGAATACCTTTGAAACAGTTCTTGGAGCTTGAGAAGAGAAAGCCAGAGGGATCTAATGTAGACTACGAGGTTCTGGGTATTGTGCGCTGCCCCCTTTACGTCATGCGTGA…	CCHX9806.b1_c_s	GGGGACTGGTGGATTCAAAATGGCTGCCAAACCTTCCCAGGAGATAGCCCATTTCACTGCAAGAGTTATATCCCGGGCTAGTGCGTTTGCTCTTCAAGGATACAAACATTGTTGTCATGTAATGCTCCACTGTCCAACAGAAGCGAGGCTGTTCAGTTATTATCCGATAAAGCATGCTGTTCTGATGCAGCTTCGGTTTGATGGTCGGTTTGGGTTTCCTGGGGGCTTTGTGGATGGCAATGAAGATCTGGAGACAGCTTTAAACAGAGAGGTTGTTGAAGAGTTGGGCAAGACATCTGAACCAGTAAACATCACCAAAGATGACTATGTCATTTCTCACAGATATGAAGAACATGTTTCTCAATTAAGCATGACCAAGAGACTTTGCCTACATTTTTT…	U8 snoRNA-decapping enzyme OS=Xenopus laevis GN=nudt16 PE=1 SV=1; Accession=NUD16_XENLA; E-value=1.0e-23	A7RVT3_NEMVE	A7RVT3_NEMVE	NA	0.1793
SEQINDEX11098_C_c	ATCCTTTTCTACACGCCGTGCGCGGCGCTGCGATATCAGAAGCAAGCAGTTTATATTCCGCGAAAGAGTTCCTCAAGGCTGAACACGCTCATTTAAGCCCGCACTATCCGAGCACCGAAGAGGAACGACTGCGTTTAGTGTCATACGTTTCTCGTGCCGATCCGGGAAATAATATGAACAGAGTTGTCGTCAATTCGCGATCAAAACGCATCCGAACTGCGTACACCAGTATGCAATTACTGGAACTTGAAAAAGAATTCAGCCAAAACAGATATCTGTCTCGTCTTCGAAGAATACAGATTGCAGCGTTGTTAGATCTTTCCGAGAAGCAAGTCAAGATTTGGTTTCAGAATCGCCGAGTGAAATGGAAGAAGGACAAAAAAGCTGCCCAGCACCCAA…	Contig2093	GGGGATCGCACAACTCATTGGCTGTCCTCGCACTCGCGTCAACATGAGTTCCTCATTCTACATTGAGTCGCTGATTCAAAGCAGCAAGCCTAAGACTGCAGTGGCGGAAGCAAGACATAGCTATGAGCCAACCGTTCCTTGTTCTTGCTGCTGGACGCCGTCTCAATCTGAAGCTTCGGGATTATGCCAATTATGCATCCCGCCGTCGGCAAGTGCCGTTCATCCTTTTCTACACGCCGTGCGCGGCGCTGCGATATCCGAAGCAAGCAGTTTATATTCCGCGAAAGAGTTCCTCAAGGCTGAACACGCTCATTTAAGCCCGCACTATCCGAGCACCGAAGAGGAACGACTGCGTTTAGTGTCATACGTTTCTCGTGCCGATCCGGGAAATAATATGAA…	Homeobox protein Hox-A3a OS=Fugu rubripes GN=hoxa3a PE=3 SV=1; Accession=HXA3A_FUGRU; E-value=3.0e-18	Q9BKI8_ACRMI	Q9BKI8_ACRMI	Q9BKI8_ACRMI	0.1203
SEQINDEX4425_C_c	ACTCATCGCCATCTTCTTTTTGAGAGGCTTCTTCTGTGCTTGTGAATCATAATGCCTGGACCAGAGGAACCGATCACCAAAGTCGTCGTTCATCCAATTGTACTTCTAAGCGTTGTTGACCACTTTTACCGAATGGGAAAAGTTGGAAACCAGAAGAGAGTTGTCGGAGTCTTGTTGGGTTCAAGGCGAAAAGGTGTTCTTGATGTTGCGAACAGTTTTGCTGTTCCTTTTGATGAAGATGACAAGGATCAAACTGTCTGGTTTTTGGATCATGATTATCTTGAAAACATGTATGGAATGTTCAAGAAAGTGAATGCTAGAGAGCGAATTGTAGGTTGGTATCACACTGGTCCAAAACTGCACCAAAATGATGTTAAAGTGAATGAGCTGATAAGAAGA…	Contig1529	GGGGGTGCTTGTGAATCATAATGCCTGGACCAGAGGAACCGATCACCAAAGTCGTCGTTCATCCAATTGTACTTCTAAGCGTTGTTGACCACTTTTACCGAATGGGAAAAGTTGGAAACCAGAAGAGAGTTGTCGGAGTCTTGTTGGGTTCAAGGCGAAAAGGTGTTCTTGATGTTGCGAACAGTTTTGCTGTTCCATTTGATGAAGATGACAAGGACCAAACTGTCTGGTTTTTGGATCATGATTATCTTGAAAACATGTATGGAATGTTCAAGAAAGTGAATGCTAGAGAGCGAATTGTAGGTTGGTATCACACTGGTCCAAAACTGCACCAAAATGATGTTAAAGTGAATGAGCTGATAAGAAGATATTGCGCTAACTCAGTTCTAGTCATTATTG…	26S proteasome non-ATPase regulatory subunit 7 OS=Homo sapiens GN=PSMD7 PE=1 SV=2; Accession=PSD7_HUMAN; E-value=1.0e-116	A7RRK5_NEMVE	A7RRK5_NEMVE	NA	0.108
SEQINDEX13970_C_c	CGGCAAAGTAGAGAAGCTTACTTCGGATGCTAAGTATGATTTGTCAGACGTGAAAGCCTCGATCGCGGCACTATCATTTATACTTTCCAGTGCTGCCAAGTACAGAGTAGATGGTGATTCATTGTCTAATGAGCTTCAGCAGCTTGGCTTGCCAAAGGAACATTCCGTGGCTCTTTGCAAAACGTACGCAGATAATTTAGTGAAGTTACAAGGAGCTTTCTTACAAAGAAGTTTGAAGGTAAACAAACTGTCAGAGCTCCAGTGGCGTGTAGATTACGTATTGGGATCCAGTGAGCTTCACGAAATCAAAGAACCAGAGGTGCAACTTAGGTTTGATAACATGGATGTCAGCAGTGGTGCAAAGGAATTTATATCGTTCTCGCTGACAGCTCGGAAGTT…	Contig2428	GGGGAACGAAGGTGTTTGCCTTGGAGGACGAGGATGAAGTTTCGGTTTTGCGGAGAACTAGATTGCCCCGATTGGGTACTTGCAGAAATAAGTACCCTTTCCAAGATAACATCCGTTAAGATGAGGCTTCTATGTGGTCAGGTGATCAAAGATTTGTTGGGAGAGTGCATCGACTACGGCAAAGTAGAGAAGCCTACTTCGGATGCTAAGTATGATTTGTCAGACGTGAAAGCCTCGATCGCGGCACTATCATTTATACTTTCCAGTGCTGCCAAGTACAGGGTAGATGGTGATTCATTGTCTAATGAGCTTCAGCAGCTTGGCTTGCCAAAGGAACATTCCGTGGCTCTTTGCAAAACGTACGCTGATAATTTAGTCAAGTTACAAGGAGCTTTCTTA…	COMM domain-containing protein 4 OS=Mus musculus GN=Commd4 PE=2 SV=1; Accession=COMD4_MOUSE; E-value=2.0e-29	Q6WRH8_BRABE	Q6WRH8_BRABE	Q6WRH8_BRABE	0.0486
SEQINDEX5324_C_c	CCCCCAGAGAATGATTGGAAGGGATTCAAACGTGATTGGCCAGACGATGGGTACGGGCTGGGGGATTATCCTAACCTCCCTGATATCTCCTATCAAAGAAGACAGCACAAGGGATGGTGGGACTGGCAGGATCGCAGGAACTTCAATGAACCTATTCATGAAGACGAAGATGGTTTGAATATTTGGATGATGCAAGAAGTTGAATGCAATGATACTTACACACCGCATCAGGCATTGATGCATATGACAGTTGCTTTTGCCATCGTTGGCTTTATTGGATTTTTATCATACCTTTATGATAAGACAGACCGTAATCCAGCGATTCCAAAGGAATACCCCTTCAATAACTTGTACCTGGAAAGAGGAGGTGATCCAAACAAAGATCCCACAGAGGAGAAG…	Contig1376	GCCGGGGAGTGTCAAGATGGCGGCCCACAGAGGGTTTTGTTTGGGACAAGCTCTTCTTCGCCGCACTGTTTTACATAGACCACAGGCCCTCACAGGGATAAGAAACGCTTATGATGATTACAAGAAGTTTCCAATCCCGACCCCAGAGAATGATTGGAAAGGATTCAAACGTGATTGGCCAGACGATGGGTACGGGCTGGGGGATTATCCTAACCTCCCTGATATCTCCTATCAAAGACGACAGCACAAGGGATGGTGGGACTGGCAGGATCGCAGGAACTTCAATGAACCTATTCATGAAGACGAAGATGGTTTGAATATTTGGATGATGCAAGAAGTTGAATGCAATGATACTTACACACCGCATCAGGCATTGATGCATATGACAGTTGCTTTTGC…	NADH dehydrogenase [ubiquinone] 1 beta subcomplex subunit 8, mitochondrial OS=Bos taurus GN=NDUFB8 PE=1 SV=1; Accession=NDUB8_BOVIN; E-value=2.0e-17	A7SD20_NEMVE	A7SD20_NEMVE	NA	0.0466
SEQINDEX15542_C_c	GGGGCGCTCGTCGAAAGACAAAAGAGATATTTATTACAGACTTGCCAAAGAGGAAGGTTGGAGAGCGAGAAGTGCCTATAAGTTGTTACAACTCAACGATGATTTCGACCTTTTGAGTGGAGTAAACCGTGTTGTGGATTTGTGTGCTGCTCCTGGAAGCTGGAGTCAAGTACTGAGCAGGAAACTGATCAACGAGCGTCCACAAGCTGATGACGAAGTAAAAATCGTAGCAGTTGACTTGCAGTCCATGGCACCTCTTCCTGGTGTTGTCCAAATACAGGGGGACATCACGAAAATCTCAACTGCTCAAGAAATTATCAGCCACTTTAAAGGACAGGCAGCAGATTTGGTCATTTGTGATGGTGCACCAGATGTGACTGGGCTTCATGATATTGATGA…	Contig4584	GGGGGATATAGCAACCGTACCGTCGAGCAGTTTCGTAACCTTTGTTAAATTGTGAAGTATATATGGGGCGCTCGTCGAAAGACAAAAGAGATATTTATTACAGACTTGCCAAAGAGGAAGGTTGGAGAGCGAGAAGTGCCTATAAGTTGTTACAACTCAACGATGATTTCGACCTTTTGAGTGGAGTAAACCGTGTTGTGGACTTGTGTGCTGCTCCTGGAAGCTGGAGTCAAGTACTGAGCAGGAAACTGATCAACGAGCGTCCACAAGCTGATGACGAAGTAAAAATCGTAGCAGTTGACTTGCAGTCCATGGCACCTCTTCCTGGCGTTGTCCAAATACAGGGAGACATCACGAAAATCTCAACTGCTCAAGAAATTATCAGCCACTTTAAAGGAC…	Putative ribosomal RNA methyltransferase 1 OS=Homo sapiens GN=FTSJ1 PE=2 SV=2; Accession=RRMJ1_HUMAN; E-value=1.0e-103	A7SLJ2_NEMVE	A7SLJ2_NEMVE	A7SLJ2_NEMVE	0.0467
SEQINDEX16072_C_c	CCAATAAGTTCCTGAGAAAAGATCATGGCTAAGATACAGATCGTGAACGTGGTAGTTTGCGAAAACCCGTCGCCGTTTTCAAGCAATTTTCAATTTCAAATCACGTTCGAGTGCACAGAGGAATTAAACGAAGATTTAGAATGGAAAATCATTTACGTTGGATCGGCGGAAAACGATTCGTATGATCAAGTTTTGGACTCTGTTTGGGTCGGACCAGTGCCTGTTGGAACCCACACATTCCTCTTTGAGGCCAAATCGCCCGATCCAAGTCAAATTCTAGATGAGGATGTGGTTGGAGTGACTGTGGTTCTCTTGACTTGCTCCTATAGAGACAAAGAATTTGTCCGAGTAGGTTATTATGTTAACAATGAATACACTGAGGAGGAAATGAAAGAAAAC…	Contig4680	GGGGCAGATTGAAAAATTTCCGCCATAAGTGAACAATGTCGTAAAACGTTCAAAATCCTCTAGTGCTTTGACGAATCTCTGCGATCTCCTTCCTATCCGATGCCATTAAGTTGCTGAGAAAAGATCATGGCTAAAATACAGATCGTAAACGTGGTTGTTTGCGAAAACCCGTCGCCGTTTTCAAGCAATTTTCAATTTCAAATCACGTTCGAGTGCACAGAGGAATTAAACGAAGATTTAGAATGGAAAATCATTTACGTTGGATCGGCGGAAAACGATTCGTATGATCAAGTCTTGGACTCTGTTTGGGTTGGACCAGTGCCTGTTGGTACCCACACATTCCTCTTTGAGGCCAAATCGCCCGATCCAAGTCAAATTCCAGATGAGGATGTGGTTGGA…	Histone chaperone ASF1 OS=Gallus gallus GN=ASF1 PE=1 SV=1; Accession=ASF1_CHICK; E-value=9.0e-60	A7RJZ7_NEMVE	A7RJZ7_NEMVE	NA	0.0446
SEQINDEX8244_C_c	TGAGTTCTGTAATGCTATCCGTGAAGTTTATGAGCATGTCTATGAGACAGTTGACATTCAAGGCAATCCAGAAGTTCGAGCTCAGGCTACCGCAAAGGCTACCATTGCAGCTTTCGCTGCCAGTGAGGGATATGCTCACCCACGTGTAGTTGAACTTCCCAAAACTGAAGAAGGACTTGGGTTTAATGTTATGGGTGGAAAAGAGCAAAATTCACCTATTTACATTTCTCGCATTATTCCTGGTGGTATGGCTGATAGGCATGGAGGATTAAAACGAGGAGATCAGCTACTGTCTGTCAATGGAGTGAGTGTTGAAGGAGAAAATCATGAAAAAGCAGTTGACCTTTTAAAGGCTGCTGAAGGAAGTGTCCGTCTTGTGGTCAAATATACTCCAAAGTT…	CCHX10916.b1_c_s	GGGGAAAGATGGCTGGGTACGAGCCACTTACGCTTGCCAGAGATGTCAACCGCGCAGTTGAATTGATTGAAAAGTTGCTAGCCAGTGGGGATATTCCACCCAAGAAACTCCAAGCTTTGCAAAAAGTGTTGCAGAGTGAGTTCTGTAATGCTATTCGTGAAGTTTATGAGCATGTCTATGAGACAGTTGACATTCAAGGCAATCCAGAAGTTCGAGCTCAGGCTACTGCCAAGGCTACCATTGCAGCTTTCGCTGCCAGTGAGGGATATGCTCACCCACGTGTAGTTGAACTTCCCAAAACTGAAGAAGGACTTGGGTTTAATGTTATGGGTGGAAAAGAGCAAAATTCACCAATTTACATTTCTCGCATTATTCCTGGTGGTATGGCTGATAGGCATG…	Lin-7 homolog C OS=Rattus norvegicus GN=Lin7c PE=1 SV=1; Accession=LIN7C_RAT; E-value=1.0e-59	A7RLN6_NEMVE	A7RLN6_NEMVE	NA	0.0295
SEQINDEX2248_C_c	CCCGATGAATTCGAAAAGACCATCTCTCAGGCTCTTTTAGAGCTTGAAGTGAACTCCTCTGATCTGAAAGTAAGTCTCAGAGAACTGTATCTAACTGGAGCAAAGGAGGTTGATGTGGCAGGGAAGAAAGCTATTGTCTTGTTTGTACCAGTGCCACAACTAAGAGCGTATCAGAAGATCCAGACCCGTCTTGTACGTGAACTAGAAAAGAAGTTCAGTGGAAAGCATGTAGTTATTGTTGCTCGGCGGAGAATTATTCCAAAACCATCCAGACATACAAGAAATGACAAGCAGAAAAGACCTAGAAGTCGAACTCTGACGTCGGTGCACGATGCAATCCTTGAAGATTTGGTTTTCCCCAGTGAAATTGTGGGAAAGAGAATACGTATCAAGTTGGAT…	Contig4496	GGGGGCTCTTTCGGCTGCCTACATGTCTTCGTAGTGATACCAGGCATGCTTACAACCAAAATCGTGAAACCCCAAGATGCGGGTGAACCCGATGAATTCGAAAAGACCATCTCTCAGGCTCTTTTAGAGCTTGAAGTGAGCTCCTCTGATCTGAAAGTAAGTCTCAGAGAACTGTATCTAACTGGAGCAAAGGAGGTTGATGTGGCAGGAAAGAAAGCTATTGTCTTGTTTGTACCGGTGCCACAACTAAGAGCGTATCAGAAGATCCAGACCCGTCTTGTACGTGAACTAGAAAAGAAGTTCAGTGGAAAGCATGTAGTTATTGTTGCTCGGCGGAGAATTATTCCAAAACCATCCAGACATACAAGAAATGACAAGCAGAAAAGACCTAGAAGTCGA…	40S ribosomal protein S7 OS=Xenopus laevis GN=rps7 PE=2 SV=2; Accession=RS7_XENLA; E-value=8.0e-72	Q8ITA9_AEQIR	Q8ITA9_AEQIR	NA	0.1908
SEQINDEX5149_C_c	TGAAGTGGGCCCTTACCCAATGGACGTTGCAACCTCAATGTACGATCACGGTCGTTCCGGAGCTCCAATGCAGCATTTAAACCATACAAGCGCTACTTCTCGTACCATCACCCGCCTGCCGCTGGAGGAGGAGTGTCGAGTGCTATGAGCGCTGTTTCAGATATTCAGAAACGAGATAAGGAGTTAATATATGGGCATTCACTGTTCCCGCTCCTCGCACTTATCTTTGAGAAATGCGAATTGGCAACATGCACTCCTCGCGAACCAGGAGCAGTTGGAGGTGATGTGTGTTCTTCTGCCTCATTCAACGAGGATATCCAGGTTTTTTCGAAGCAGTTCAGAAGCGACAAGACGATTTTTTCGTCCAACCACGAAGTCGATAGTCTGATGATTCAGTCG…	CAOI1032.b2_c_s	GGGGGGGATTGTGAAGTGAAAAACAAAGAGGAACGAGCTCTGCGAAATTAGGGCACAAAACTTCTTGGGTAGGTCCGCGTTTACGCCTGTAATCGCCCCCCATTTCAAAGGATTTTTTGTTAAGTGGTTTTGGAATTCTTACATCCTATGCCCTCGCGAAGATGCCCCACGGAAAACAGTTTCAAGAGCTCTATTGCTGTCACGAGCGCATAACAGACCCTTCGTTAAACACGTCTGTTGGTTCAGAAGATGGCACGGGTGACAATACGGACGATGAACAGTCAAAGAAAAGTCAGAAGAAACGAGGGATCTTCCCGAAAGCAGCGACAAATATCATGAAGGCATGGCTCTTCCAGCATTTAACGCATCCTTACCCATCGGAAGAGCAAAAGAGGTCTT…	Homeobox protein Meis2 OS=Mus musculus GN=Meis2 PE=2 SV=2; Accession=MEIS2_MOUSE; E-value=1.0e-98	A7SIN3_NEMVE	A7SIN3_NEMVE	NA	0.1787
SEQINDEX4176_C_c	TCCTACTACAGTGCCTAATTCGCATCCCGATACAACCCCGGCCAATTCGCTGCCGATGCGATTACGGAAGCTGCCTCCTTCGTTCTTTAAGCAGCCCCCGATTGATGGAGGATTGTCTCCTGAAACGGACCATCCCTCGGGGCTCCAGATCAGCCACTCGCGAGCACATTCTTCGCCGGCTTCAATAACAGTTCCTTCGAGTCTTAAAGGTCCTCCAAACCACTCCTTGAGCTCTGTTGTTCATCAGCGTTCAACGTCATTTGATAACACCGCTTTACTTGAGGAACCCGCACAAATGCCGCCTGGATGGGAAATACGCTCCACACCGAACGGACAACACTATTTTATGAATCATTTCGATCAAATAACTACATGGCAAGACCCGAGGAAAACACAGTC…	CCHX3874.b1_c_s	GGGGACTACCCATGCAGCATAACAGTCTCTCTGATTACCGCGCGATCGAACAATAATATTTGATGCGCCAGGGACTGTAAAGGCAAAGCGTACAACGTAACGGCACACAGTTCACTGATAATGGAAAGGACAAACAGTAACTGCGTGGTCCACGTTCGACAGGACTCGGACACCGATTTAGAGGCACTTTTTCATGTTGTGAATCCTACTACAGTGCCTAATTCGCATCCCGATACAACCCCGGCCAATTCGCTGCCAATGCGATTACGGAAGCTGCCTCCTTCGTTCTTTAAGCAGCCCCCGATTGATGGAGGATTGTCTCCTGAAACGGACCATCCCTCGGGGCTCCAGATCAGCCACTCGCGAGCACATTCTTCGCCGGCTTCAATAACAGTTCCT…	65 kDa Yes-associated protein OS=Mus musculus GN=Yap1 PE=1 SV=1; Accession=YAP1_MOUSE; E-value=1.0e-38	A7SLN5_NEMVE	A7SLN5_NEMVE	A7SLN5_NEMVE	0.1509
SEQINDEX1123_C_c	GTAGTAAATCTTCAAGTCTTTTTAACGGCGCTTGATTCATATTTACAACTACGAAGAAACTAGAACGGGCGACAAAAGTCACAAAGTCACTTCATTGAAGCTTCAAGACTTAACATAACATGGATCATCGATTTTCCGACTGTGGTATGTGTTAGTTGTACTGGCGATGTTATTTCCAATGAGAAGTGATGTCGGAAACGTTAATAGTAAGGAGCTCTTGGAAAGCCGTAAAGACCCTTTATCCACAAAGAAATAAGCCCATTTGAATAGGAAACAACACATGCAAGATGGCGACAAGCAATTATAATTCCTCCTTTCGCGGTCCTACTGATCACGAAACCGCTCGCTCTTCCAAAACGGTCACGTTTTACATCAATGGTGACCGAAATTTCCATGGCC…	CCHX3066.b1_c_s	GGGGGGATCAAAAAATACGAGTGATGGTCACGGAGGGAAAGGAAAACAAAGGAAGAAAGATTCCGTGAGTAAGAATCAAACTTCTAGCAGCAACAAAACCCTCACTAAATCTTCAAGAGATGATAGTGGAATTGTAGCTGAGGACGATGTGAAATACGGTACTGTCACGGACAAAAACGTCGAAGATGTCTATCACATGGGAAAGAAAATTGGAGATGGTAATTTCGCTGACGTAAGAGAGTGTGTGGATAAAATAACAAAGAAAGAATTTGCGTTAAAAATTGTGGACAAGAACAAGATTCGAGGCAAAGAGCAAATGATAAAGGAGGAGATAGAGATCATGCGGAGATGCAAACACCCAAACATTGTTCAAATGTACGAAGATTATGACACACCACG…	Serine/threonine-protein kinase DCLK1 OS=Homo sapiens GN=DCLK1 PE=1 SV=2; Accession=DCLK1_HUMAN; E-value=8.0e-26	A7S1C2_NEMVE	A7S1C2_NEMVE	A7S1C2_NEMVE	0.1444
SEQINDEX2967_C_c	TTCCTGGCTTTTATTTATGGAAAACGTCATAGCTGTGGATTAGTTCCTGAGTTGCATCGATGTTTGATTCAATACGCGAGAAGGTTTTGGAGTGTTTCAAAATTTAACAGCGTTTGAGGTCTGTTCAGCATGGCAAGCAGTTGCGCTTCTGCATCGAAGAAGAAAGACAAACGAACAACACTGGTCGACTTTGAGTTGTCCACAACGTTAGGCACTGGAACTTTTGGCCGGGTCCTCTTGTGCCGCGATAGGATAACTTCGGAATATCATGCGCTGAAGATAATGAATATCCGAGAAGTGATCAGACTTAAACAAGTTGAACATGTTCAAAACGAAAAGAGTATTTTATCCAAGATAGAACATCCTTTCATCGTCAATTTGTTGTGGACACACCATGAC…	CCHX8847.b1_c_s	GGGTATCCAAGATAGAACATCCTTTCATCGTCAATTTGCTGTGGACACACCATGATAACACGTTCTTGTATATGCTCCTGGAATATGTATGTGGGGGAGAACTTTTTACATACCTTCGCACAGCTGGTCGATTTAACAATGGAACAGGATTATTTTTTGGTGCAGAAATAGTGTCTGCCTTGGATTATTTGCATGGCAATAATATTGTTTACCGTGACTTGAAGCCGGAGAATATTTTGCTGGACAGAGAGGGGCATGTAAAACTTACAGATTTTGGATTTGCCAAAGAAGTACAAGACAAAACATGGACTCTCTGTGGTACTCCAGAATATCTTGCTCCAGAAATTATCCAAAGCAAAGGTCATAACAAAGCTGTGGATTGGTGGGCACTAGGAATTC…	Protein kinase DC2 OS=Drosophila melanogaster GN=Pka-C3 PE=1 SV=2; Accession=KDC2_DROME; E-value=1.0e-124	A7SM62_NEMVE	A7SM62_NEMVE	A7SM62_NEMVE	0.1218
SEQINDEX13242_C_c	AGAAAAGGNACATAACGCCAGTTGAATTGTCACGATCTGTCCTTGGATTGTTTGTGGAAAGTTATAAATACTCTTTGGATATCTAACAAGGAATACAACCTAAAAATGCTCTTCCACGGTTTGTTTTGGGAGCCGTTCGCACTTCTTGATCTCAGGCTCTAGCTTTGCCAATGATGAGTAAAAAGAGGTAGCTCAATTGAACCATTAATTTTTCTGGCGATGCAGTCGTTACAAACGATGTCTAAAGCTCCTACACAGTCTGCTAACCTTCCTCCTCTTCAAAATCTTCCTTCGTGGACAAGGAACTCTTTGTTGAGGAAGAAACAACCACGGCAGATAATTCGTGATCATTTGGAACCCATAAATCCAATCGTTGAAGAAATGGATAACAGCAGAGCC…	CCHX8736.b1_c_s	GGGGAGAAAAGGAATATAACGTCAGTTGAATTGTCACGATCTGTCCTTGGATTGTTTGTGGAAAGTTATAAATACTCTTTGGATATCTAACAAGGAATACAACCTAAAAATGCTCTTCCACGGTTTGTTTTGGGAGCCGTTCGCACTTCTTGATCTCAGGCTCTAGCTTTGCCAATGATGAATAAAAAGAGGTAGCTCAATTGAATGAACCATTAATTTTTCTGGCGATGCAGTCGTTACAAACGATGTCTAAAGCTCCTACACAGTCTGCTAACCTTCCTCCTCTTCAAAATCTTCCTTCGTGGACAAGGAACTCTTTGTTGAGGAAGAAACAACCACGACAGATAATTCGTGATCATTTGGAACCCATAAATCCGATCGTTGAAGAAATGGATAACA…	Coiled-coil domain-containing protein 74A OS=Homo sapiens GN=CCDC74A PE=2 SV=1; Accession=CC74A_HUMAN; E-value=1.0e-08	A7SXS9_NEMVE	A7SXS9_NEMVE	NA	0.1213
SEQINDEX1045_C_c	GTTCTCTTCGTGCTATATGAGCATGCTTCGGGCTATGCTGTCTTCAAAGTCATTGCACAAGAAGAAATCGGTGTGTTGTTGCCAGAAGTTCAAGAATCAGTGAATGATCTTGCGCGGTTCGGAAAACTGATCAAACTCTCTGCGTTTTCACCCTTCAAATCGGGAACGAATGCACTAGATAACACCAATTGCGTATCGGAAGGTGTTGTTCATGATGACCTCAAGACTTTTTTGGAGGCAAATGTACCAACTGGAAAGAAGAAGAAAAAGGTTGCATTGGGTGTAGCTGATCCAAAACTTGGCGCCGCCATTCAGGAGTCTGTGAGCATCTTTTGTGAATCTGGGGAGTGGTGCTGGAAGTCCTCAGGGGAATTCGATGTCACTTTGCGAAGATGATTA…	Contig2078	GGGGGAGGCTGCGAAATTGCAAGAAAATGGTTCTCTTCGTGCTATATGAGCATGCTTCGGGCTATGCTGTCTTCAAAGTCATTGCACAAGAAGAAATCGGTGTGTTGTTGCCAGAAGTTCAAGAATCAGTGAATGATCTTGCGCGGTTCGGAAAACTGATCAAACTCTCTGCGTTTTCACCCTTCAAATCGGGAACGAATGCACTAGATAACACCAATTGCGTATCGGAAGGTGTTGTTCATGATGATCTCAAGACTTTTTGGAGGCAAATGTACCAACTGGAAAGAAGAAGAAAAAGGTTGCATTGGGTGTAGCTGATCCAAAACTTGGCGCCGCCATTCAGGAGTCTGTGAGCATCTTTTGTGAATCTGGCGGAGTGGTGCTGGAAGTCCTCAGGGG…	Nucleolar protein 5A OS=Homo sapiens GN=NOL5A PE=1 SV=4; Accession=NOL5A_HUMAN; E-value=1.0e-163	A7SGM6_NEMVE	A7SGM6_NEMVE	A7SGM6_NEMVE	0.1139
SEQINDEX450_C_c	CAATCGCGGTGAGCACTCTCTCCGATGATTCCGGCCGAGCAAATCCAAAAATGGCCACTGCCATACCTCCATACAACGGGCAAAAAGACAAACACGCTAAAGGATATTTTGAAAAGCCTGTCGTTCAAAAGCTTTTGAATAAGACAGAACAGAAAGCACCTGGAGATTCAATAAGTGGCAAGCAGATGGATAAATTTTATAACACAGGCATGATGGGCACCTACATGAAACTTCGCAACAGTGCTGGCGCCGGACACTCAAAAAGTCAAGTGGGTGGTCATGGCTTGTTTATGGAAAACATCCCACCGCTAAATGGATATCACGGTTCTTTTGGTTTTAGAAGGAACACTCCTTCACTGCGAAACCACCCATCAGTATTCACAGGGAAAATTGACAGTC…	Contig742	GGGGCTTGGTTACCTTGCAGACCAAAGAGGCGAATTGCACCCTCTGTCCACACGAATGCAAAACAAAAGAAAATGCCGCACGACCAAGACTATAAATTAGCAAGATTTGCAAAGTATGGGCCACCTCCTCTGACATCCGAGGAGAAAACAAAGCAAGAGAAGGGATTTATTCTCGATGCAATCGCGGTGAGCACTCTCTCCGATGATTCCGGCCGAGCAAATCCAAAAATGGCCACTGCCATACCTCCATACAACGGGCAAAAAGACAAACACGCTAAAGGATATTTTGAAAAGCCTGTCGTTCAAAAGCTTTTGAATAAGACAGAACAGAAAGCACCTGGAGATTCAATAACTGGCAAGCAGATGGATAAATTTTATAACACAGGCATGATGGGCACC…	Uncharacterized protein LOC388381 OS=Homo sapiens PE=4 SV=1; Accession=YQ031_HUMAN; E-value=2.0e-25	A7SFG2_NEMVE	A7SFG2_NEMVE	NA	0.1112
SEQINDEX8030_C_c	AATCGTTCAAAATAAATGCTATTTTGAAATGAAAATACAATCAGGAGGTGCATGGGGTGTAGGACTTGCCACAAAGAAATGTAATCTAAGCAAAGTACCCTTAGGCAATGATAATGAAAGCTGGGTTTTGAGATCTGATGGCACTGTTGCGCACAATGGAACCATAAGACACAGACTGCGAGACATTCCAGAAGAGGGAGACATGATTGCTTGCACATATGATCATGTAGAACTAAACTTTTATCACAATGGAAAGCACCTTCATAGTCCATTAACAGGAATAAAAGGAACAGTATACCCTGTCTTTTACGTTGATGATGGGTCCATTATTGATGTCAATTTCTCTGAATTTGTCTATCATGCACCAGAGGGATTTCAGAAGATAATGTTTGAAAAAAA…	Contig2562	GGGGGCGGCCGAAGAGGAAATAAGCTATGTGGCGGATTCGCAAGAGCTAAGAGATGAAATGAAAAACAATTCTTCTTCAAAGATACGCAATGGAAGCTTGTGGATTGGGTGTTTTGTGTTGCTTGAGGCGATACCATCAGCCTAGAAATCCTCCGGAGAGGGAGGCACCTCAAGTGCAGCTTGACACGGGACAAATGGGAAATGAGGTTGTCATTGTGAAATCTGGGAAAAGAATTTGTGGATCCGGGGCAGCATTGGCTAATGCAGGAATCGTTCAAAATAAATGCTATTTTGAAATGAAAATACAATCAGGAGGTGCATGGGGTGTTGGACTTGCCACAAAGAAATGTAATCTAAGCAAAGTACCCTTAGGCAATGATATTGAAAGCTGGGTTTTGA…	Chronic lymphocytic leukemia deletion region gene 6 protein homolog OS=Rattus norvegicus GN=Clld6 PE=2 SV=1; Accession=CLLD6_RAT; E-value=8.0e-41	A7S8G3_NEMVE	A7S8G3_NEMVE	NA	0.0969
SEQINDEX7451_C_c	GGACCCTTCTACAAAAGAATTTATCTTTCAACAAACGATGTTTCGGATAAAAGACCCGAAAGCATCCTTGGACTTCTACACACGTGTGATGGGTATGAGACTTTTAGCAAAATTCCATTTCTCAGCAAAGAAGTTTTCACTTTATTTCCTGGGATTTGAGGATCCTCTGAACATCCCACAAGATGCAGATGAAAGGATCAAGTGGCTTTGTGCACAAAAAGCTAGTTTGGAGCTGACTCACAACTGGGGGAGTGAAAATGACCAAGATCTCAAATACCACTCTGGAAATTCTGAACCAAAGGGATTTGGGCACATTGGTCTTGCTGTTCCGGATGTGGGCAAGGCTTGTGAGCGATTTGAGAAGCTAGGTGTGACTTTTGTCAAGAAACCAAGTGATGA…	Contig1995	GGGGACAGCATTTTTGTTTTTTTACGAATCATGGCTCTATCAGAGGAAGAAATAGCTTCTTGCCTTCGTGAACCGGACCCTTCTACAAAAGAATTTATCTTTCAACAAACGATGTTTCGGATAAAAGACCCGAAAGCATCGTTGGACTTCTACACACGTGTGATCGGTATGAGACTTTTAGCAAAATTCCATTTCTCAGCAAAGAAGTTTTCACTTTATTTCCTGGGATTTGAGGATCCTCTAAACATCCCACAAGATGCAGATGAAAGGATCAAGTGGCTTTGTGCACAAAAAGCTAGTTTGGAGCTGACTCACAACTGGGGGAGTGAAAATGACCAAGATCTCAAATACCACTCTGGAAATTCTGAACCAAAGGGATTTGGGCACATTGGTCTTGCT…	Lactoylglutathione lyase OS=Macaca fascicularis GN=GLO1 PE=2 SV=3; Accession=LGUL_MACFA; E-value=2.0e-49	A4FUZ1_BOVIN	A4FUZ1_BOVIN	NA	0.0958
SEQINDEX47816_C_c	TATGTCAGGGAATNAGAAAAGGTTCAGAGATATATGGCATCGTCTGGACCTTTGCGCTTTCAAGGGCGTGACAGTAAACAGACTTTCACAAAAACTAGCGACAAAAAGTCGAATGTTTCGTTTAGACACAAATTTCAGTGCAACCCAAACGTGTCGTCGACGGCGGTCAATGGGCCTTCCCTTCTAAATGTGCGTTCAACAAAGATCAATCCAAAGGAAAAACGGTCACTACATCCTTTTAACAGCGAGAGGGTCAGAAAACAAGGGGATAGTGATCACGAAACAAAGAGGATGAAATCTAAAAATGATCCTTCGTCTTTGATGAATCACACTCGGTTGCTAGTAAATGATAGCGAGTGCAGAGACGAGCGCACAAGGCGAAATTCACCTAATCTTTCG…	Contig3746	GGGGGGGCTACGTAGTATCGAAGTCGAAGGGTGAAGACTATAAGCGTTTGGCGTTTTTCTGTGAATATGTCAGGGAATCAAGAAAAGGTTCAGAGATATATGGCATCGTCTGGACCTTTGCGCTTTCAAGGGCGTGACAGTAAACAGACTTTCACAAAAACTAGCGACAAAAAGTCGAATGTTTCGTTTAGACACAAATTTCAGTGCAACCCAAACGTGTCGTCGACGGCGGTCGATGGGCCTTCCCTTCTAAATGTGCGTTCAACAAAGATCAATCCAAAGGAAAAACGGTCATTACATCCTTTTAACAGCGAGAGGGTCAGAAAACAAGGGGATAGTGATCACGAAACAAAGAGGATGAAATCTAAAAATGATCCTTCGTCTTTGATGAATCACACT…	NA	A7SIY4_NEMVE	A7SIY4_NEMVE	NA	0.0821
SEQINDEX6086_C_c	GGTTTCTCTAAGGACGCCATCTTGAGCCTGTGAGGGTAGAAGGGTTGCGAATCCGCCTTCATCGCCTCTGTCAGACAAATGAGTTGAATTTTTTGAAGTGAAAACGAAAACACAAGGATTCATAATGTGGCGAATTCGTGAATTACAGGATAGAGTGACGAATGTGGTTATGAATTATACTGAAATTGAAGCAAAAGTGAGGGAAGCGACAAATGATGATACTTGGGGTCCGCACGGCTCCATTATGGCAGAAATTGCACGGTGTACGTTTACGTACGAGCATTTTCCAGAAGTTATGTCAATGCTATGGAAGAGGATGCTCCACGAAGGCAAAAAGAATTGGCGGAGAATTTACAAGTCTTTGCTTCTCCTCACCTACCTAGTAAAGAATGGGTCTGA…	Contig4609	GGGGGTCAGACAAATGAGTTGAATTTTTTGAAGTGAAAACGAAAACACAAGGATTCATTATGTGGCGAATTCGTGAATTACAGGATAGAGTGACGAATGTGGTTATGAATTATACTGAAATTGAAGCAAAAGTGAGGGAAGCGACAAATGATGATACTTGGGGTCCGCACGGCTCCATTATGGCAGAAATTGCACGGTGTACGTTTACGTACGAGCATTTTCCAGAAGTTATGTCAATGCTATGGAAGAGGATGCTCCACGAAGGCAAAAAGAATTGGCGGAGAATTTATAAGTCTTTGCTTCTCCTCACCTACCTAGTTAAGAATGGGTCTGAACGAGTAGTCACTAACACAAGGGATCATATTTATGACCTGAGGCAACTGGAAAATTATAGTCATT…	Clathrin interactor 1 OS=Homo sapiens GN=CLINT1 PE=1 SV=1; Accession=EPN4_HUMAN; E-value=2.0e-79	A7RIC8_NEMVE	A7RIC8_NEMVE	A7RIC8_NEMVE	0.0813
SEQINDEX14089_C_c	AGATGGCGACTCCAGTGGTCCGATATGTTTATCGAGCGAATTTCTGTCGTTTTCTTCGTCCGTTGGGGGGATCTCGCCAACTATATTCTACAGAATCAACGCCATCTGTAGTTGAAACACAGCATAAGGAATTGGAAGTTATAGATGAGGATGGAAAGGAAGTCATTTATCCTACAACAGGTGTGCCAGACTGGCTTGTCAAGGAACGGAAAGCAAGGATCTTTGTCCCCTCTAGAAATGCCATGCAATCTGGGACATTTAACACTCACAACTGGCATCTTGAGTTTGACACCATGGAACGATGGGAAAATCCATTAATGGGTTGGGCCTCAAATGCTGATCCTCTGTCTAATATGTGCCTAAAGTTCAGTTCTAAGGAGGCCGCTGTTAATTATGCTG…	Contig3652	GGGGAAGAGAAATTTCAAGATGGCGACTCCAGTGGTCCGATATGTTTATCGAGCGAATTTCTGTCGTTCTCTTCGTCCGTTGGGGGGATCTCGTCAACTATATTCTACAGAATCAACGCCATCTGTAGTTGAAACACAGCATAAGGAATTGGAAGTTATAGATGAGGATGGAAAGGAGGTCATTTATCCTACAACAGGTGTGCCAGACTGGCTCGTCAAGGAACGGAAAGCAAGGATCTTTGTCCCCTCTAGAAATGCCATGCAATCTGGGACATTTAACACTCACAACTGGCATCTTGAGTTTGACACCATGGAACGATGGGAAAACCCATTAATGGGTTGGGCCTCAAATGCTGATCCTCTGTCTAATATGTGCCTAAAGTTCAGTTCTAAGGAGGC…	NADH dehydrogenase [ubiquinone] iron-sulfur protein 4, mitochondrial OS=Mus musculus GN=Ndufs4 PE=1 SV=3; Accession=NDUS4_MOUSE; E-value=9.0e-44	A7SYP5_NEMVE	A7SYP5_NEMVE	NA	0.0779
SEQINDEX11258_C_c	GAAACCAAAGTGAGTGCCGTCCCTCTGATGATGAAGTAAAGGGAAAGTCTCTCTTTTTGCAGACGTAGGAAAGAAATAGAGGACTTAATTGCTGCCTGCCTTTAGTTTCTTGCTGGTGACCTGTCATGGCGACAACCCGTGAACAACCTTCCATTGGCACTCCTCATCTTCCTGCCGGTTCGGGCGCCCATCCCGCAAAATCGGTGTTGAAAGAAGCGGTTGACGCTGTACTTAATTCATTTGCCAAGCATACGCATGGTTATGGCAGAGTGAACGTGATTGAAGCTTTGCAAGAGTTTTGGCAAATGAAAGAATCACGTGAAGTCCCTCTGAAGAGTGGTTCAGCCATTCTCTATGAACCTGAGGCATCCGAGAAGCCACCATATGTTTGCTTTGTCA…	Contig4857	GGGGAAGGACCATGAATCTATCAGTTGACAGCTCCCGAGATCCCACTACTGGTGTTGGAGCATTTCGATTCATGTTGGAATCAAATAAGGGCAAAAGCATGTTGGAATTCCAAGACCTCATGACCATTTTTCAACTTCTACATTGGAACGGAAGTTTAAAGGCAATGAGGGATAGAAACTGCTCCCGGCAAGAAGTGCTGGAGCATTATTCAGATAGAACTATTGACGATGGGATGCGGAGTCAAATGGCTTTGGACTGGATTTCTCGGGAACAGGAGCAACAAGGTTTGATCAAGAGAGAACTGGATAAGGCCTGCAAAGAGCTTGATCAATGTCGGTTGAGTGGGCGTGAGCTTAGGTTCCCAAAGGAGAAAAGAGACATATTGAGGCTAGCTTGGA…	LIX1-like protein OS=Mus musculus GN=Lix1l PE=2 SV=2; Accession=LIX1L_MOUSE; E-value=1.0e-103	A7S9K0_NEMVE	A7S9K0_NEMVE	NA	0.077
SEQINDEX1238_C_c	GTATAGCATTATGATCTCTAAGAACGGCGTTCCCGTNCGAAATGTTCCCAACCTTCACGAAGCTGCATTTACAGGTGATTTAAGAGAAGCTACACAGGCGCTAGAGAATGGCCAGAGCCCTAAAGCATTTGATGAGTCAGGGTCAACAGCATTACACAAAGCATCTGCAAATGGACATTTAGAAGTACTGAAACTCCTCATCCAGCATGACGGTGATGTTGAACTTGCAGATATGTCAGGTTGTACACCACTACATCTGGCAGCAAGAAATGGCCACCTAACTTGTGTTAAGTTCCTGATATTGCAAGGAGCAGACTTTCGCGTCAAATCAAAGAAAGGCAATACAGCCATGTCCATGGCAAAGGCAAACTGTCAGCCCAAGGTAGCAGAGTACCTCTC…	Contig1585	GGGGGAGGTTGAAATGTCGTCTGCAATATGGCGGACGAAATAGAATAAATTACAACTTTACCTCTTTTCGTAACCGCTAGCATTATGATCTCTAAGAACGGCGTTCCCGTGCGAAATGTTCCCGACCTTCACGAAGCTGCATTTACAGGTGATTTAAGAGAAGCCACCCAGGCGCTAGAGAATGGCCAGAGCCCTAAAGCATTTGATGAGTCAGGGTCAACAGCATTACACAAAGCATCTGCAAATGGACATTTAGAAGTACTGAAACTCCTCATCCAGCATGACGGTGATGTTGAACTTGCAGATATGTCAGGTTGTACACCACTACATCTGGCAGCAAGAAATGGCCACCTAACTTGTGTTAAGTTCCTGATATTGCAAGGAGCTGACTTTCGAGTC…	Ankyrin repeat domain-containing protein 28 OS=Mus musculus GN=Ankrd28 PE=1 SV=1; Accession=ANR28_MOUSE; E-value=3.0e-15	A7SNN7_NEMVE	A7SNN7_NEMVE	A7SNN7_NEMVE	0.0662
SEQINDEX8111_C_c	GCGGGAGATATTTTTTGCCTCGTGGCTGCAGTGAAGTCCATTCAGTTGAGAATTTTTTCGTCTGCAAACGCCATCCGTGAAAGTTTCACAGTACCAGTATGTCAAACTCTTGCTGCGAAGAAGATCAAGCATGCTGCTCACCTCCAAGTGACACTGCTGCTGCAATCCTGCAGAATCCAGGAACCTTGGCTGCTTTGCAGGCAGGTTTAAATAGAATCATCGGACAGCAATCAGGATATATACAGAGTTTGCCCAAGCCTGTAAAAAGAAGAATCAAGGCTCTTAAAAATATACAGGTGGAATGTGCTAAAGTGGAAGGATTGTTTTATGAAAAGGTCCATGCCCTCGAGTGTGAATTTGCTGAAAAATTCAAGCCATTATTTGATAAACGGCGTAACA…	Contig3921	GGGTGGCTGCAGTGAATTCCCTTCATTTGAGAATTTTTTCGTCTACAAACGCCATCCGTGAAAGTTTCACAGTACCAGTATGTCAAACTCTTGCTGCGAAGAAGATCAAGCATGCTGCTCACCTCCAAGTGACACTGCTGCTGCAATCCTGCAGAATCCAGGAACCTTGGCTGCTTTGCAGGCAGGTTTAAATAGAATCATCGGACAGCAATCAGGATATATACAGAGTTTGCCCAAGCCTGTAAAAAGAAGAATCAAGGCTCTTAAAAATATACAGGTGGAATGTGCTAAAGTGGAAGGATTGTTTTATGAAAAGGTCCATGCCCTCGAGTGTGAATTTGCTGAAAAATTCAAGCCATTATTTGATAAACGGCGTAACATCGTGAATGGTACTGTGGA…	Nucleosome assembly protein 1-like 1 OS=Pongo abelii GN=NAP1L1 PE=2 SV=1; Accession=NP1L1_PONAB; E-value=2.0e-89	A7RZK7_NEMVE	A7RZK7_NEMVE	NA	0.0629
SEQINDEX13643_C_c	AACATCTTCCAAACCATCTCATTATTTCAAAGTGCTACAAAATGCCAGTTGAAAATCTCGAAGAAGAAGGTCTACCTAAAAATCCTAACCTTGAGCTAGCAGCCTGGCGTTTTACTCTTAATAATCCAGAAGGAAAAGATAAAGAAGATGCGAAGAAAAAGCTTTTGGAAGCCATCAAAGAAAATGATATGGCTCCACTTTATGAAGAAGTCTGTGCTGAACTCAAGTGGCCGGTAGACAAAGCTCTGTTGGCAAAAATGCAATCAAAAAACCAGGAAAAGCTTGAAAAGCTTGATGAAACACTGAAAGATACTGAAGAAAATTTAGGAGAGACAGAAGTTAGAGATGCTCTCTATGATAAGGCTGAGTATCTGTGCAAGATTGGGGAGAAGGAGAAGG…	Contig4048	GGGGGGCGAGTACAGCGTGAAAGGTGAAGTCATTTATTTTGAAAAGCTAGAAAAAAAAACACGTTTTAAAGAGCAAAAATTACATAGCTCTATCTTGAAGTTCACACTTCCTCCTTTTAGAAAGAGTGTGATTTCAAATAAGCCTGAAAAACTTATCAGAGGTCGCTAAGTAATTGAGGCCAGGTTACCAAGAGTTAAGAACCAACAACTTCGAAACCATCTCATTATTTCAAAGTGCTACAAAATGCCGGTTGAAAATCTCGAAGAAGAGGGTCTACCAAAAAATCCTAACCTTGAGCTAGCAGCCTGGCGTTTTACTCTTAATAATCCAGAAGGAAAAGATAAAGAAGATGCGAAGAAAAAGCTTTTGGAAGCCATCAAAGAAAATGATATGGCTCC…	26S proteasome non-ATPase regulatory subunit 6 OS=Mus musculus GN=Psmd6 PE=2 SV=1; Accession=PSMD6_MOUSE; E-value=4.0e-97	A7SZN8_NEMVE	A7SZN8_NEMVE	NA	0.0526
SEQINDEX9559_C_c	ATTTTACCAAATTTCGCTCAAGATGAGCGGTTTACCAAGGGAAATACTGAAATGGATCCAGAGTTTGGATCTTTCTCATCCTGTTAGGAATACTAGAAGAGATTTTTCAAATGGATATCTCGTAGCAGAGATCTTCTCGTGGTATTTTCCAGAGGAAATCGAAATGCATTCGTACGATAATGGAACATCGTTACCGAGCAGACAAGGGAACTGGAGTCAACTGCAGAGATTCTTTCAGAGACATGAATTTGACATTCCAAAAGAGGTGATAGATGGCACTATTCACTGTAAGCCAAATGCTGCTGCACTTTTGATGGAAAGGATTTACTCTCTTTTGACAAATAGAAAAATAAAAAACTCTCCTGGGGCAGCTGAACACGAATTTGACTTCACTGACAA…	Contig3953	GGGGATTTTAACAAATTTCGCTCAAGATGAGCGGTTTACCAAGGGAAATACTGAAATGGATCCAGAGTTTGGATCTTTCTCATCCTGTTAGGAATACTAGAAGAGATTTTTCAAATGGATATCTCGTAGCAGAGATCTTCTCGTGGTATTTTCCAGAGGAAATCGAAATGCATTCCTACGATAATGGAACATCGTTACCGAGCAGACAAGGGAACTGGAGTCAACTGCAGAGATTCTTTCAGAGACATGAATTTGACATTCCAAAAGAGGTGATAGAGGGCACTATTCACTGTAAGCCAAATGCTGCTGCGCTGTTGATGGAAAGGATTTATTCTCTTTTGACAAATAGGAAAATAAAAAACTCTCCTGGGGCAGCTGAACACGAATTTGACTTCACTG…	Spermatogenesis-associated protein 4 OS=Pan troglodytes GN=SPATA4 PE=2 SV=1; Accession=SPAT4_PANTR; E-value=7.0e-33	A7S652_NEMVE	A7S652_NEMVE	NA	0.0401
SEQINDEX16393_C_c	GGATACAAGCCAAGCTGAAAGCACAAATGGTCTCACTAGAAATAGCCAAACCTCAACTGGCAGTAGAATATTACACTCAGGAGGAAATGGTCAAGTTTAAGAAACCCAAGAAGAAACGAAAAATCAAGAAGAGGGAAACCCTAAAGGCAGATGATCTTGAAGAACTGCCAGGTCAAACAGATTTGAGCAGTGATCGTGGATCAAGAAGTGTGAAGTCAATCCTGAAGAATGCACCAAGGAGACATGAAAGAGAAAAAGCTGATGATGATGATGATGATATGATGGAATTGGATCCTTTGGTTCCAGATGAAGAAGAACAAGTTGTGGATGATGGAGATCACTCTGTGATAGTTGAAGAAGATGAAGCTCAGCTGGAACTTCAGCTAGCATTAGAGAGAT…	Contig3047	GGGTTGTACAGAAATGTCCTTTGATCATCTTTACGTTATTTGTAGAGAGGAAGAGAGAGAACGAGGCGTAAGATCATCAAGAGATTTCGACAGGGAACGAGACAGAGATCGTGATAGAGACAGATATGGTGGATCATCCAAGAACAAACAGGTGTACAAACCAGATGTGAAGCTTGAGTATTATGATGACAATGGTCGCTCGCTGACGCCGAAAGAGGCTTTTCGCTACTTGTCGCATAAGTTTCATGGTAAAGCATCGGGGAAGATGAAGTCAGAGAAAAGAAATAAGAAACGTCAAGATGAAGTGGCGCTTCAGAAGATGAACTCGGGGGATACGCCACTGAACTCTACCGCGCTACTCATAGAGAAACAGAAAAACGCCCAGTCCCCCTACGTCAT…	U4/U6.U5 tri-snRNP-associated protein 1 OS=Homo sapiens GN=SART1 PE=1 SV=1; Accession=SNUT1_HUMAN; E-value=3.0e-35	A7SFV2_NEMVE	A7SFV2_NEMVE	NA	0.0325
SEQINDEX13852_C_c	TTTATTGTCCACCGCAGAATTTCCAGATCAATTGGAGGAAATTCGTGCCGTTTTATTGAAGGTTGATGAGCTGCATTCTGTGAGACAGAAGCTGACAGCAGAGATGGCGGACCACTCCAACTTGATCAGAAGTCTAGTTGTGAGAGCTGAAGATGCCAGACTAATGGGAGACATGAAGAATATGAGAAAAGGCTACATGGAACTGTACGACTTGAACAGAGATTTAATCAATGGGTACAAGATCAGATGTAACAACCACAATGAACTACTGTCCTGTTTAAAACTTGTTAATCAGGCTATTCAGCGAGCTGGCAAGCTGCGAGTTGGCAAGGCAAAAGCTCAGGTTATTGCAGGATGCCGACAAGCTATCAAAAACAACAATGTCAATGGCTTGTTCAA…	Contig1888	CCGCATGTAGAACTCTCCATCTTGACCACTAATGAAACCGTCATTCGCACCGTCATGATATTTGCTGAAGGAGTGTTTGAAGGGGAAAGCCATGTTGTACATCCTTCGCAGCAAAATCTCAAATCAACGCTACAACTCCCAGTTTTTCCTCCAAAGGATATACCCGTGGACCTGCACATCAAAGCTTTTGTTGGCTACAAATCCAGTTCTCATTTTCACGTGTTTGAGCTTACAAGACAACTTCCAAGGTTCACTTTGTACATACCATGCCCCGATGGTTATGCCGAGCCGAAATCTTACTGCACCTTTCATATAAACGAAAGAATCAACCGGGTTGTAATGTGGCTCAATCAGAATTTTCTTCTCCCCGAGGAGATTGAAGGCAAAGATGCTGCACTG…	Bardet-Biedl syndrome 2 protein OS=Homo sapiens GN=BBS2 PE=1 SV=1; Accession=BBS2_HUMAN; E-value=1.0e-50	A7S9V7_NEMVE	A7S9V7_NEMVE	NA	0.2959
SEQINDEX15673_C_c	TGGGACCTCAGTTGGGTCAATTGAGCACCATGGGAGCANTGAACCAAATGCCACAGGTGAACCCAGGAGGACACATGTCACAAATGACTCCAGCCTCACAAATACCACCAGTGAACCAGGTGCCACCAGTAGGGGTGTATGGATCACATATGCCACAACAAGGAAATCGTCCAATGGCCAGACGGCGCAAGAGTCAGTATCAGAACTCGCCATTGGCAAATGCTTTATCTCCTCCAGTCACACCTGGACCTATACCAAGCCCTTACATGAGTATTAGTGATGTTGGAAATAGTCCTGCAAATTGTTATGATATAAAGCCGCAAGTTGTTCCCAGTACTGCATCACCACAGGCTTATGAGGATATCAAACCTCCAAGGTTAAATATACCTGAAAATGATG…	Contig5346	GGGCAAACCTCCAAGGTTAAATATACCTGAAAATGATGTTATCAGGCTAACATTTCCAGTACGAGATGGTATCGTTCTGCCGCCGTTCCGACTGGAGCACAATTTAGCTGTTAGCAACCACGTTTTCCATCTTCGAGACTCTGTTCACCAGACGCTCATGATGAGACCTGATCTCGAGCTACAATTTAAGTGTTATCATCATGAAGATAAACAAATGTACACCAACTGGCCGGCATCGGTCACTGTTAGTGTGAATGCTAATCCGCTAATGATAGAGAGGCAAGGAGATAACAAGACGTCGCACAAGCCCCTTCATCTGAAGAATGTGTGCAAACCAGGAAGAAATACCATCCAGATAACAGTCACAGCATGTTGCTGTTCTCATCTCTTCGTCCTCCA…	Zinc finger MIZ domain-containing protein 1 OS=Homo sapiens GN=ZMIZ1 PE=1 SV=3; Accession=ZMIZ1_HUMAN; E-value=1.0e-113	A9JRY4_DANRE	A9JRY4_DANRE	NA	0.1996
SEQINDEX4786_C_c	CAACCCAATTGATGTCTTTTCAGGAACTACTTTTTAATGTGGATACAGGCTATCTGGAAGCATTGGTAAGAGGATTCAGATCAGGGATCCTTACTCAAAGTGATTACCTCAATCTGTCACAATGTGAGACGTTGGAAGATCTTAAGCTGCACCTTCAGAGCACTGATTATGGAAACTTTCTTCAAAATGAAGCTGGACCCCTGAATGTTTCAGTTATTGATGACAGGCTGAGAGAGAAGCTGGTTACAGAGTTCCGGCATTTACGTAATCAAGCTCTGGAACCAATGGCAACTTTCATGGACTTCATCACTTACAGTTATATGATTGACAACATCATTCTTCTAATAACTGGGACATTACATCAGCGGCCAATCACAGAGCTGGTTCCCAAGTGTCATC…	CCHX9117.b1_c_s	GGGGACAGTAGCGTTCATCGCCGCCATCTTGAATTTACTTACTTGTACGTCATGGCGGAGACAACCCAATTGATGTCTTTTCAGGAACTACTTTTTAATGTGGATACAGGCTATCTGGAAGCATTGGTAAGAGGGTTCAGATCAGGGATCCTTACTCAAAGTGATTACCTCAATCTGTCACAATGTGAGACGTTGGAAGATCTTAAGCTGCACTTTCAGAGCACTGATTATGGAAACTTTCTTCAAAATGAAGCTGGACCCCTGAATGTTTCAGTTATTGATGACAGGCTGAGAGAGAAGCTGGTTACAGAGTTCCGGCATTTACGTAATCAAGCTCTGGAACCAATGGCAACTTTCATGGACTTCATCACTTACAGTTATATGATTGACAACATCATT…	Vacuolar ATP proton pump d 1 OS=Pongo abelii GN=ATP6V0D1 PE=2 SV=1; Accession=VA0D1_PONAB; E-value=1.0e-168	A7SQT8_NEMVE	A7SQT8_NEMVE	A7SQT8_NEMVE	0.1319
[truncated: 2,202 more rows]
